# Supplementary material for: One-pot Nazarov cyclization/oxidative 1,2-carbon rearrangement/Ritter reaction to access 5-quaternary-4-amidocyclopent-2-enones and 2-quaternary-3-amidoindanones
Source: Royal Society of Chemistry journal article supplement (doi:10.1039/d4cc06597b), 2025-01-01

$^1\text{H}$  NMR (400 MHz,  $\text{CDCl}_3$ )

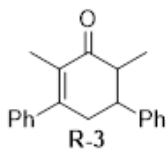

7.384  
7.368  
7.348  
7.325  
7.309  
7.259  
7.234  
7.214

3.092  
3.065  
3.043  
3.035  
2.973  
2.928  
2.901  
2.789  
2.752  
2.739  
2.723  
2.707  
1.803

1.023  
1.007

0.084  
-0.000

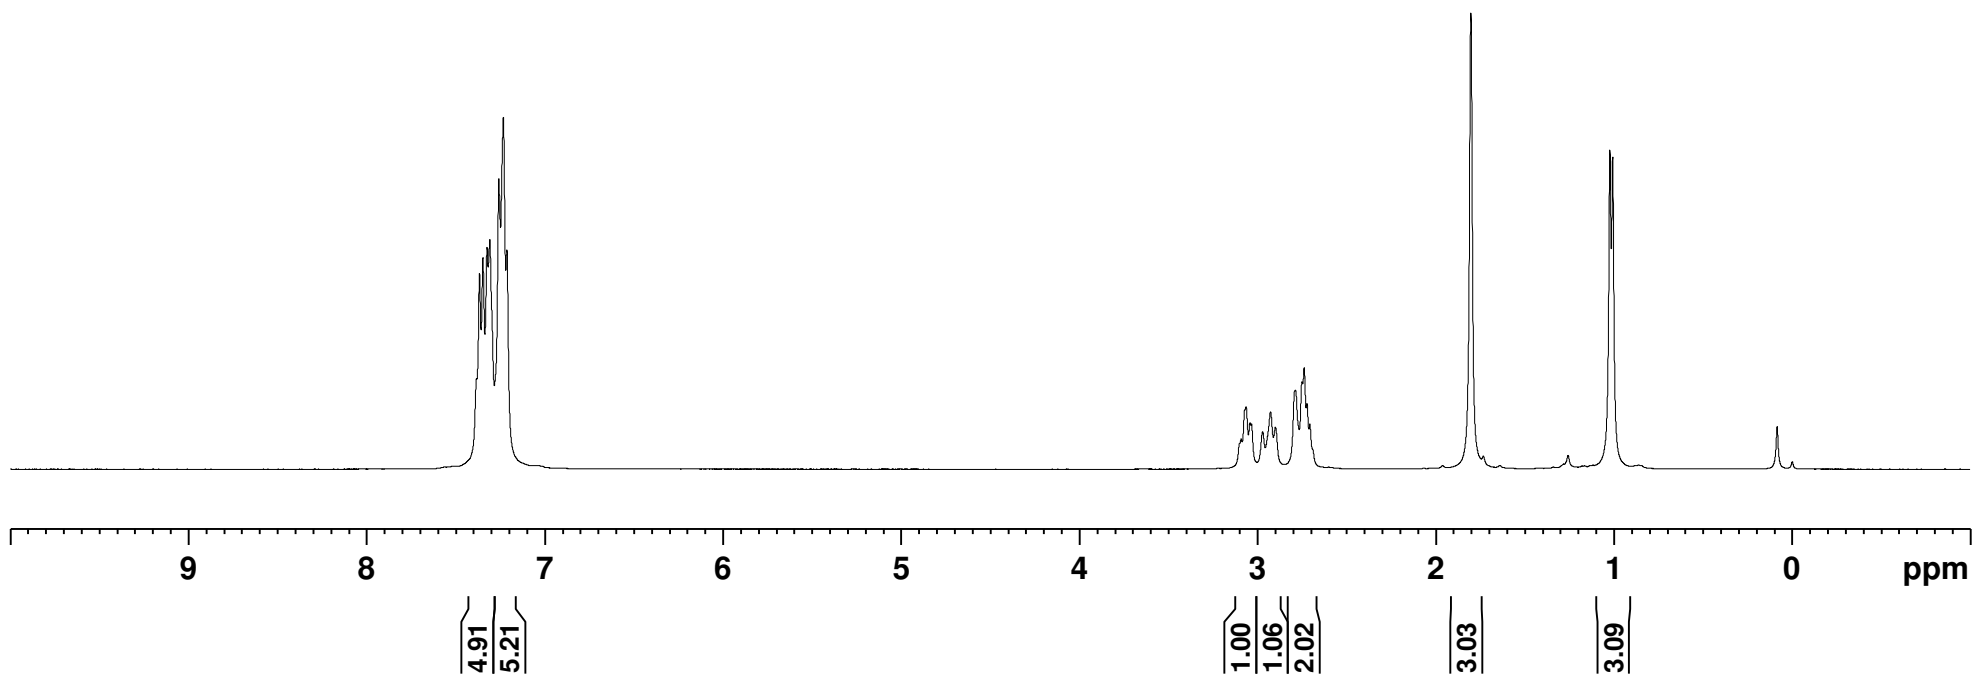

<sup>13</sup>C NMR (100 MHz, CDCl<sub>3</sub>)

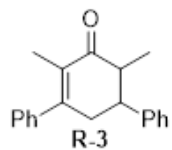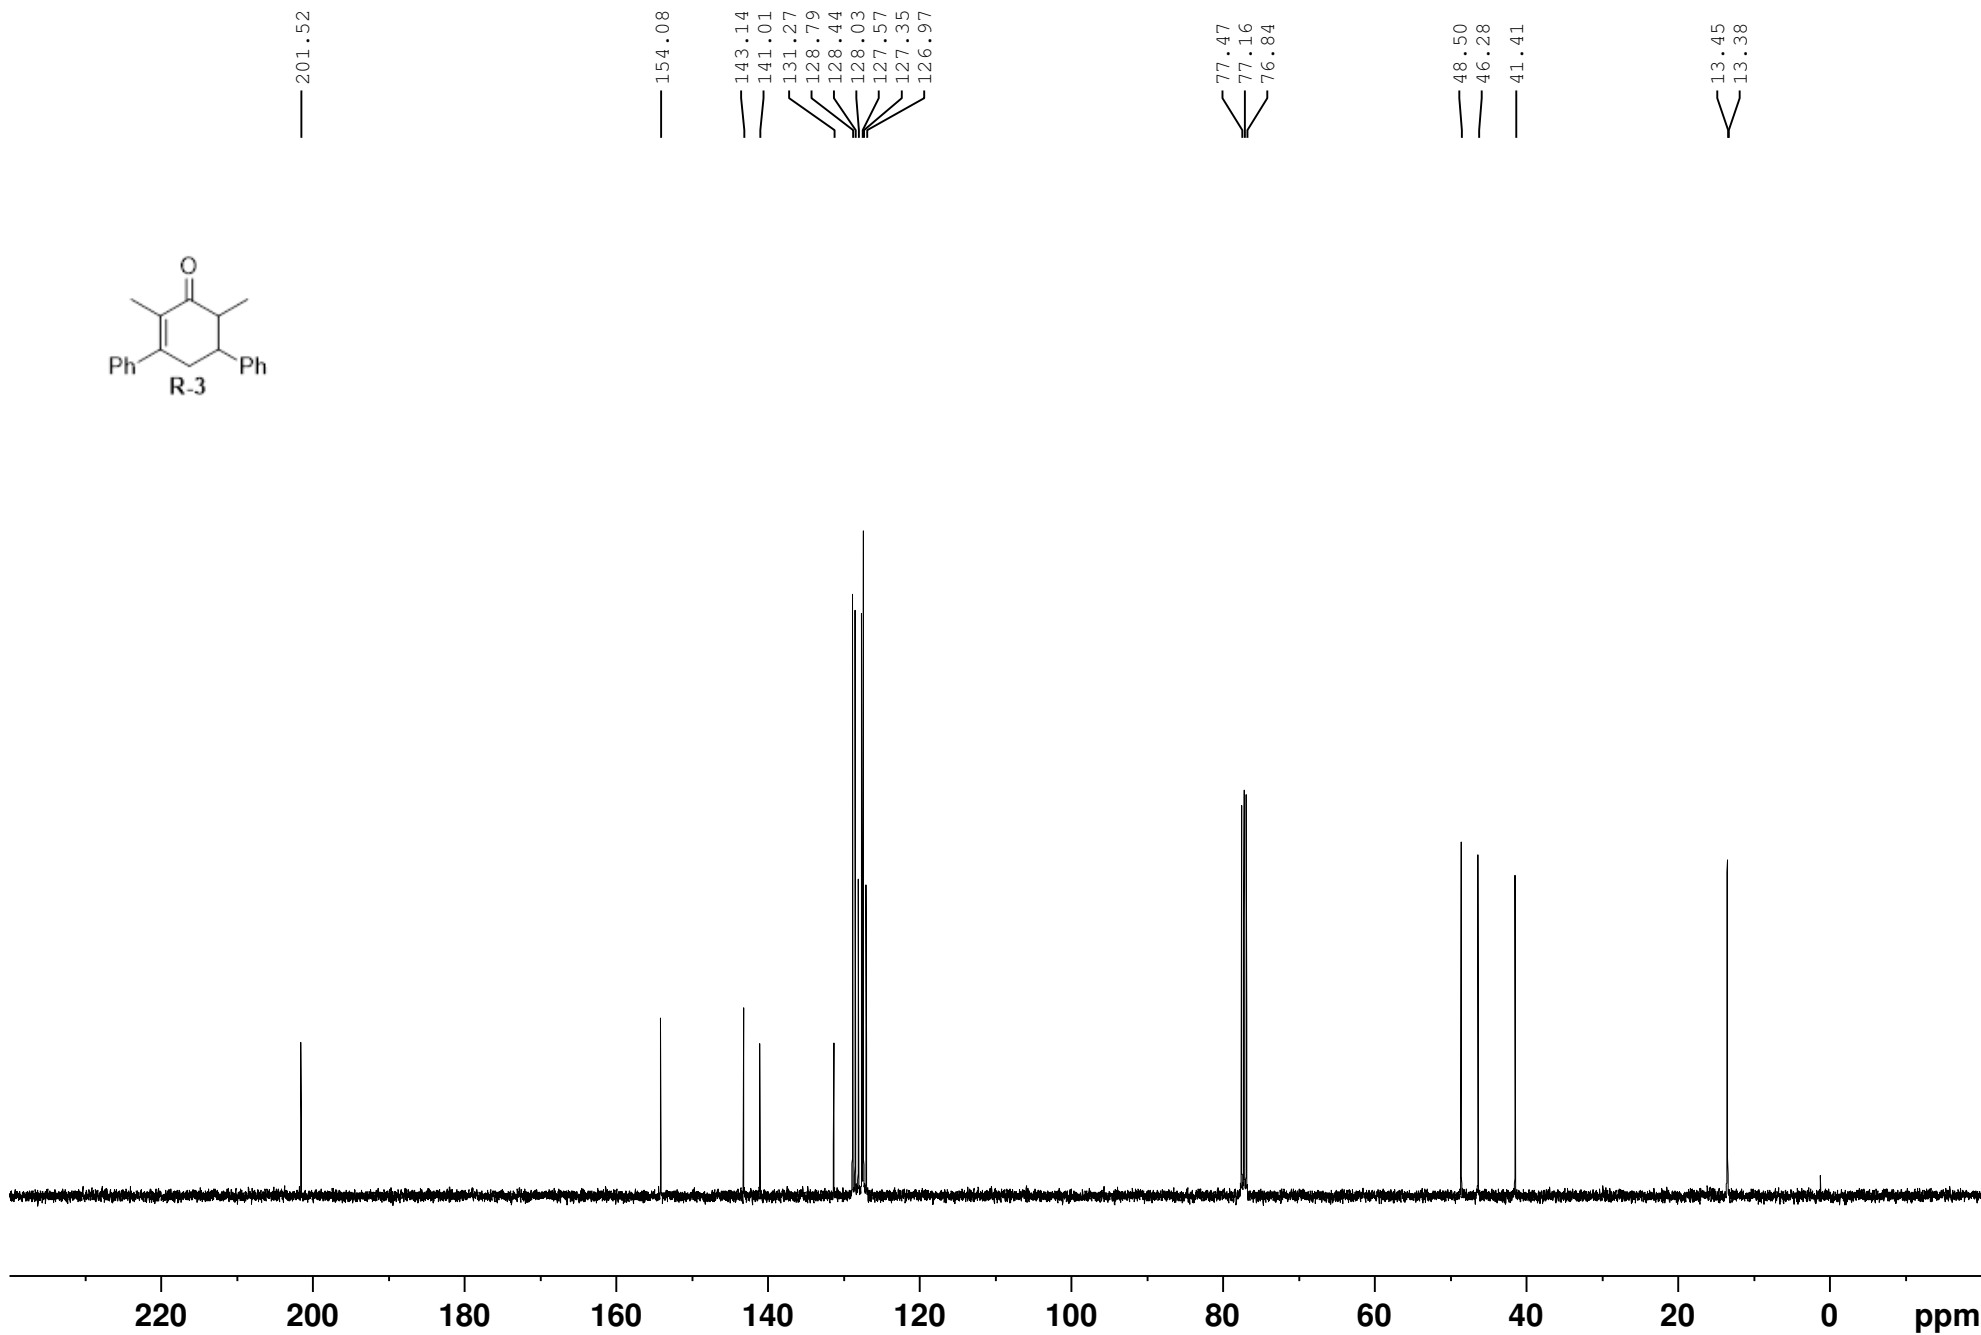

$^1\text{H}$  NMR (400 MHz,  $\text{CDCl}_3$ )

7.414  
7.397  
7.378  
7.363  
7.358  
7.341  
7.327  
7.311  
7.294  
7.276  
7.264  
7.249  
7.227  
7.208  
7.072  
7.069  
7.052  
5.922  
5.899  
5.323  
5.126  
5.117  
5.107  
5.103  
5.093  
5.084  
4.606  
4.594  
4.574  
4.563  
3.251  
3.245  
3.219  
3.212  
3.205  
3.199  
3.172  
3.167  
2.827  
2.821  
2.817  
2.811  
2.793  
2.781  
2.774  
2.770  
2.764  
2.747  
2.738  
2.594  
2.590  
2.546  
2.542  
2.010  
1.985  
1.883  
1.838  
1.836  
1.455  
1.233  
-0.000

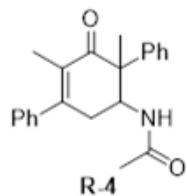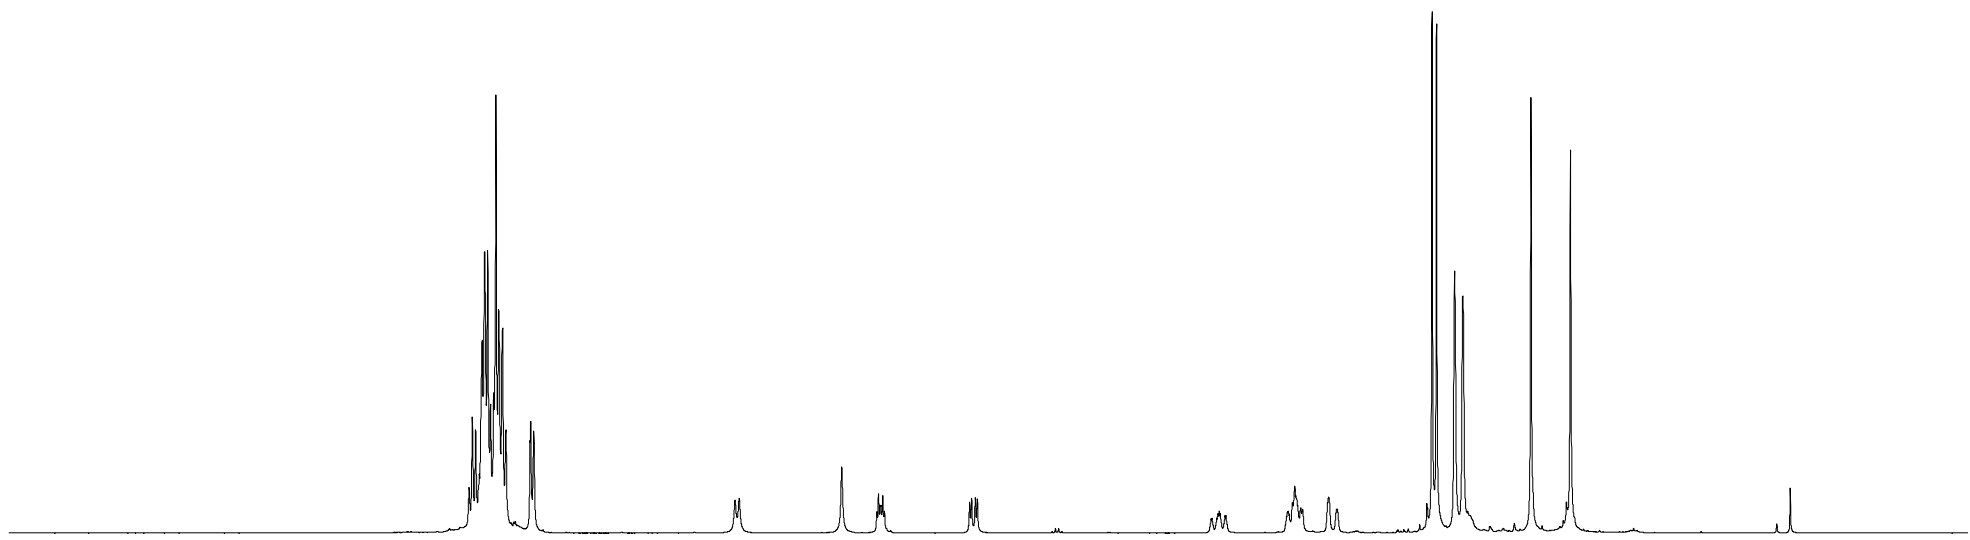

9 8 7 6 5 4 3 2 1 0 ppm

2.27  
18.24  
2.04  
1.01  
0.95  
1.02  
0.95  
0.97  
2.01  
1.01  
2.91  
3.10  
3.04  
3.10  
3.00  
2.87

$^{13}\text{C}$  NMR (100 MHz,  $\text{CDCl}_3$ )

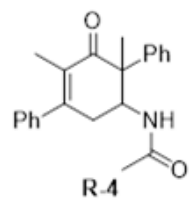

202.13  
197.67

170.22  
169.62

154.11  
151.68  
142.41  
140.94  
140.08  
139.28  
131.85  
130.54  
129.28  
128.79  
128.50  
128.42  
128.23  
128.17  
127.40  
127.26  
126.30

77.47  
77.16  
76.84

62.24

54.16  
53.23

43.88

36.58  
35.62

23.61  
23.50  
22.46  
18.23  
13.82  
13.69

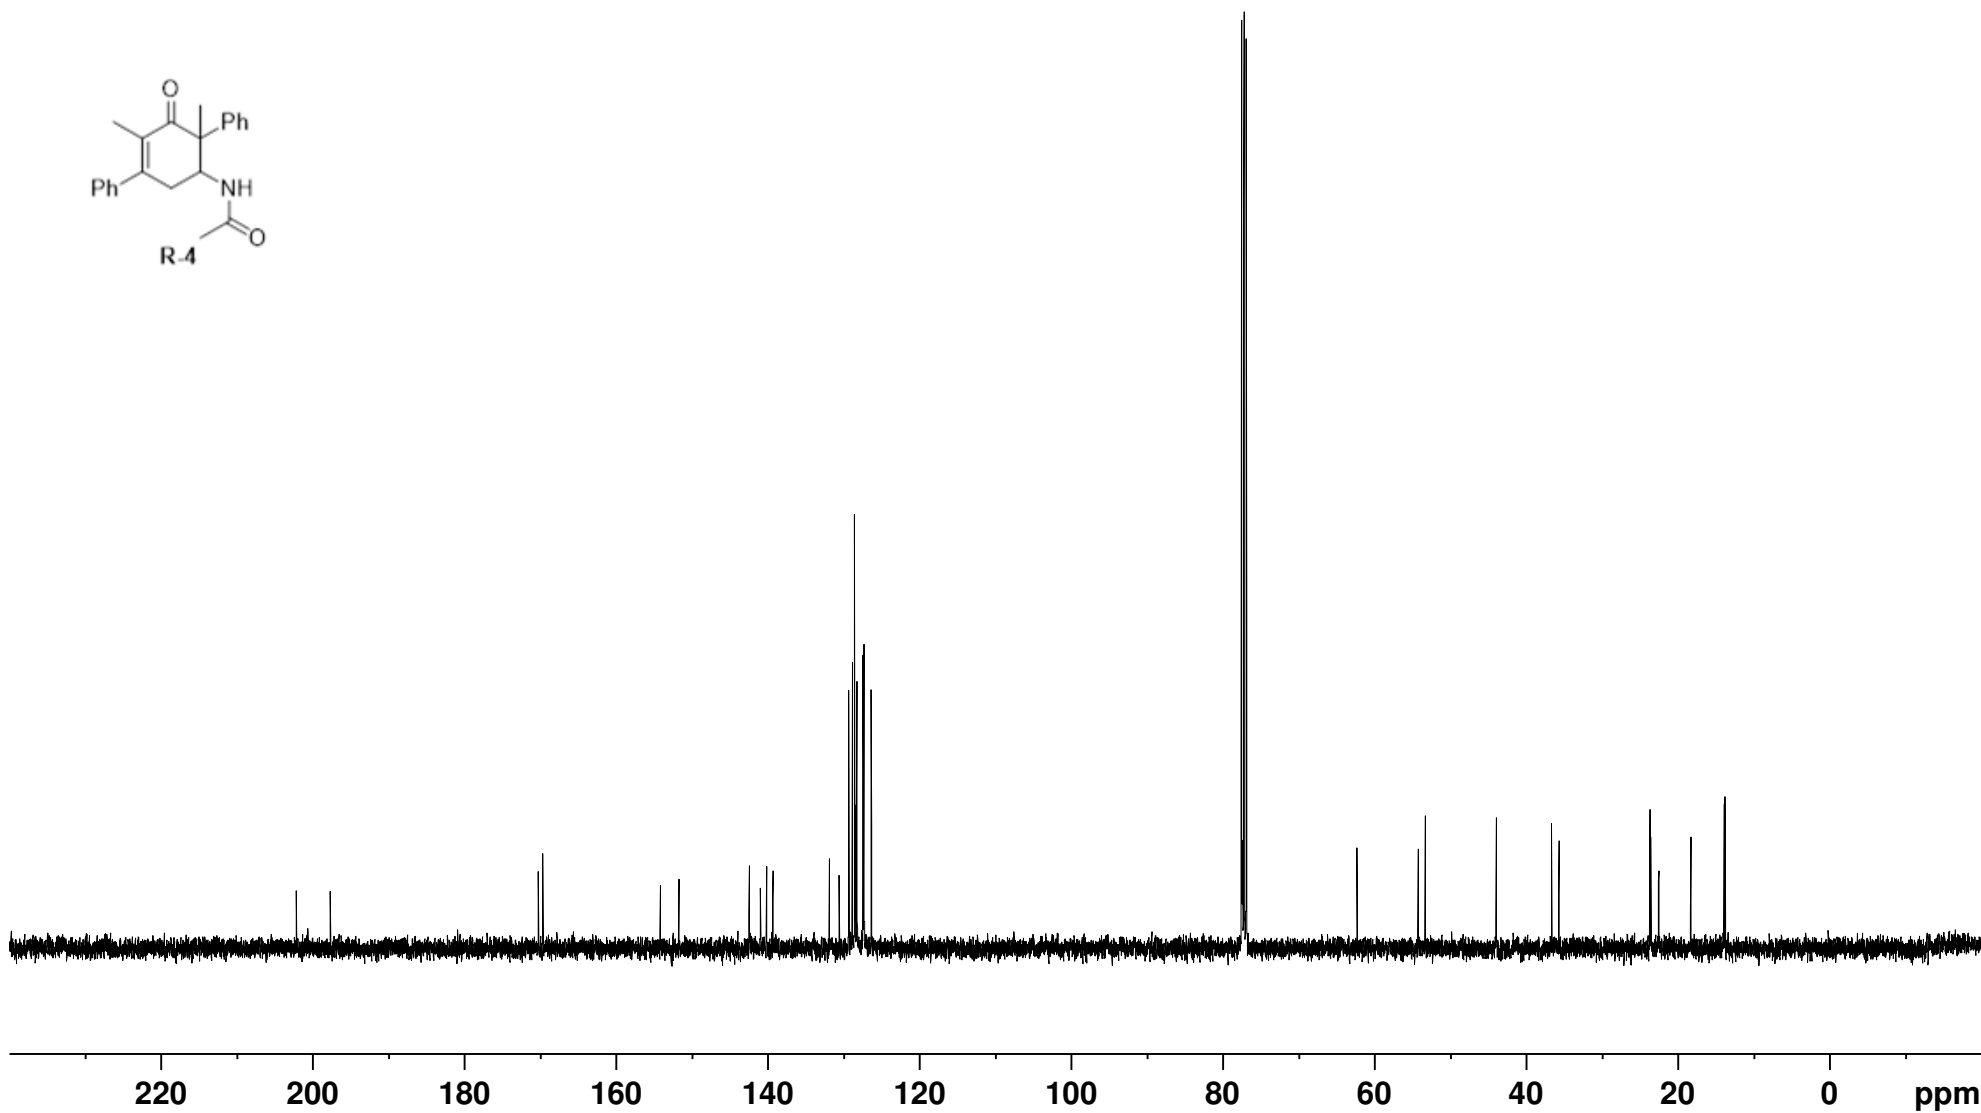

$^1\text{H}$  NMR (400 MHz,  $\text{CDCl}_3$ )

7.714  
7.693  
7.473  
7.461  
7.453  
7.445  
7.428  
7.408  
7.357  
7.351  
7.335  
7.317  
7.295  
7.275  
7.259  
7.238  
7.222  
7.219  
7.074  
7.058  
7.042  
7.039  
7.023  
5.362  
5.353  
5.344

2.956  
2.950  
2.908  
2.902  
2.800  
2.752  
2.439

1.838

1.398

0.072  
-0.000

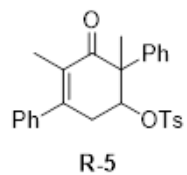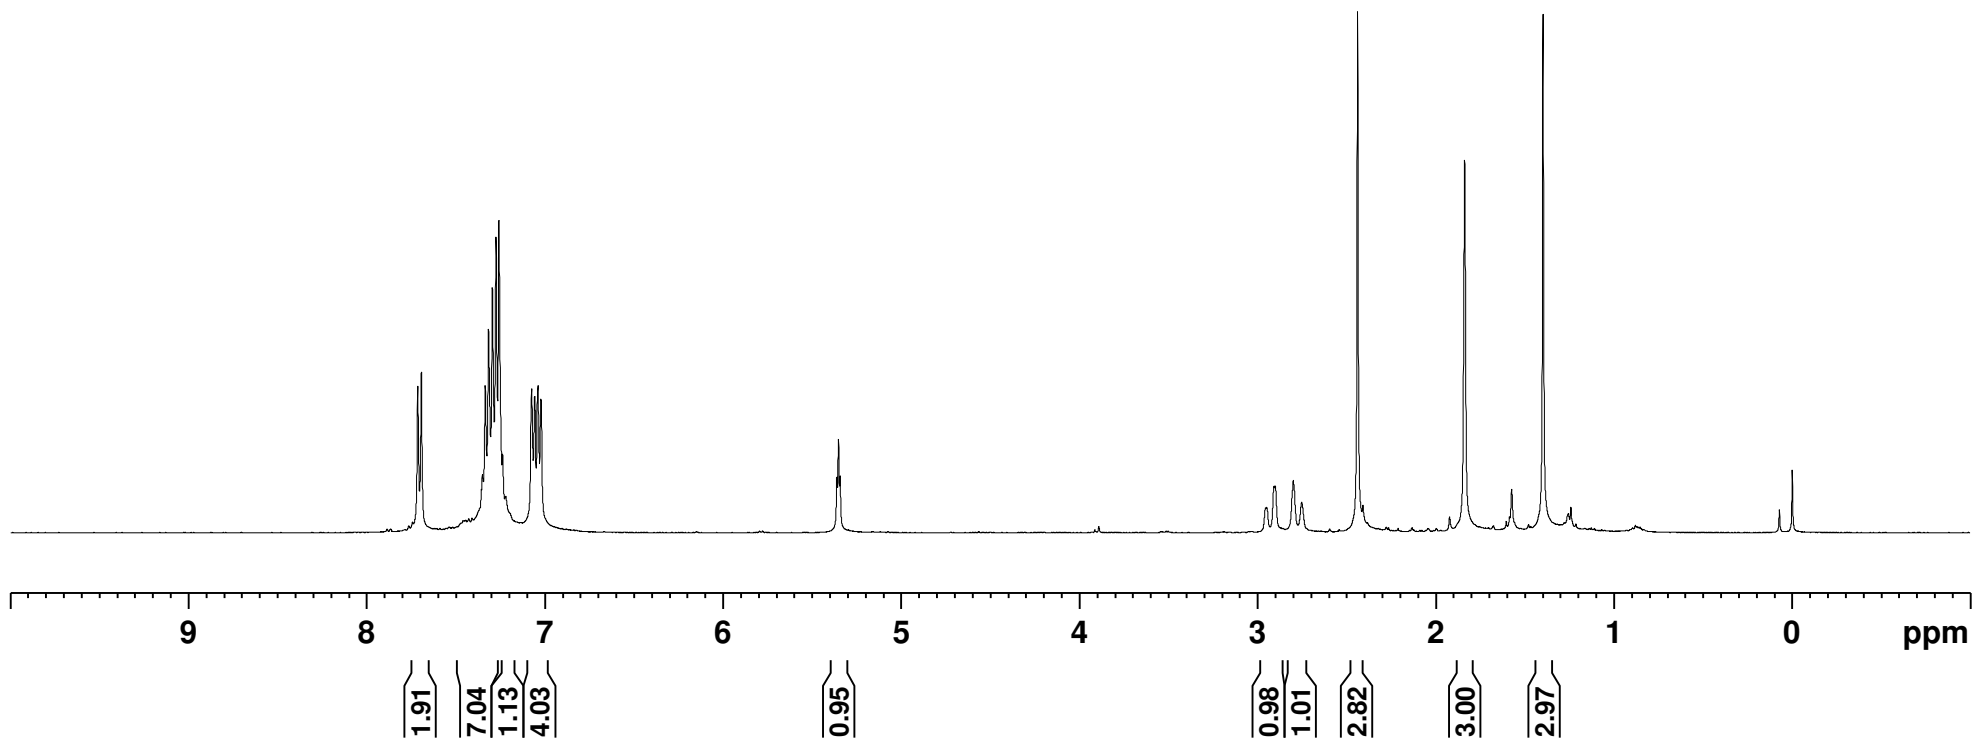

$^{13}\text{C}$  NMR (100 MHz,  $\text{CDCl}_3$ )

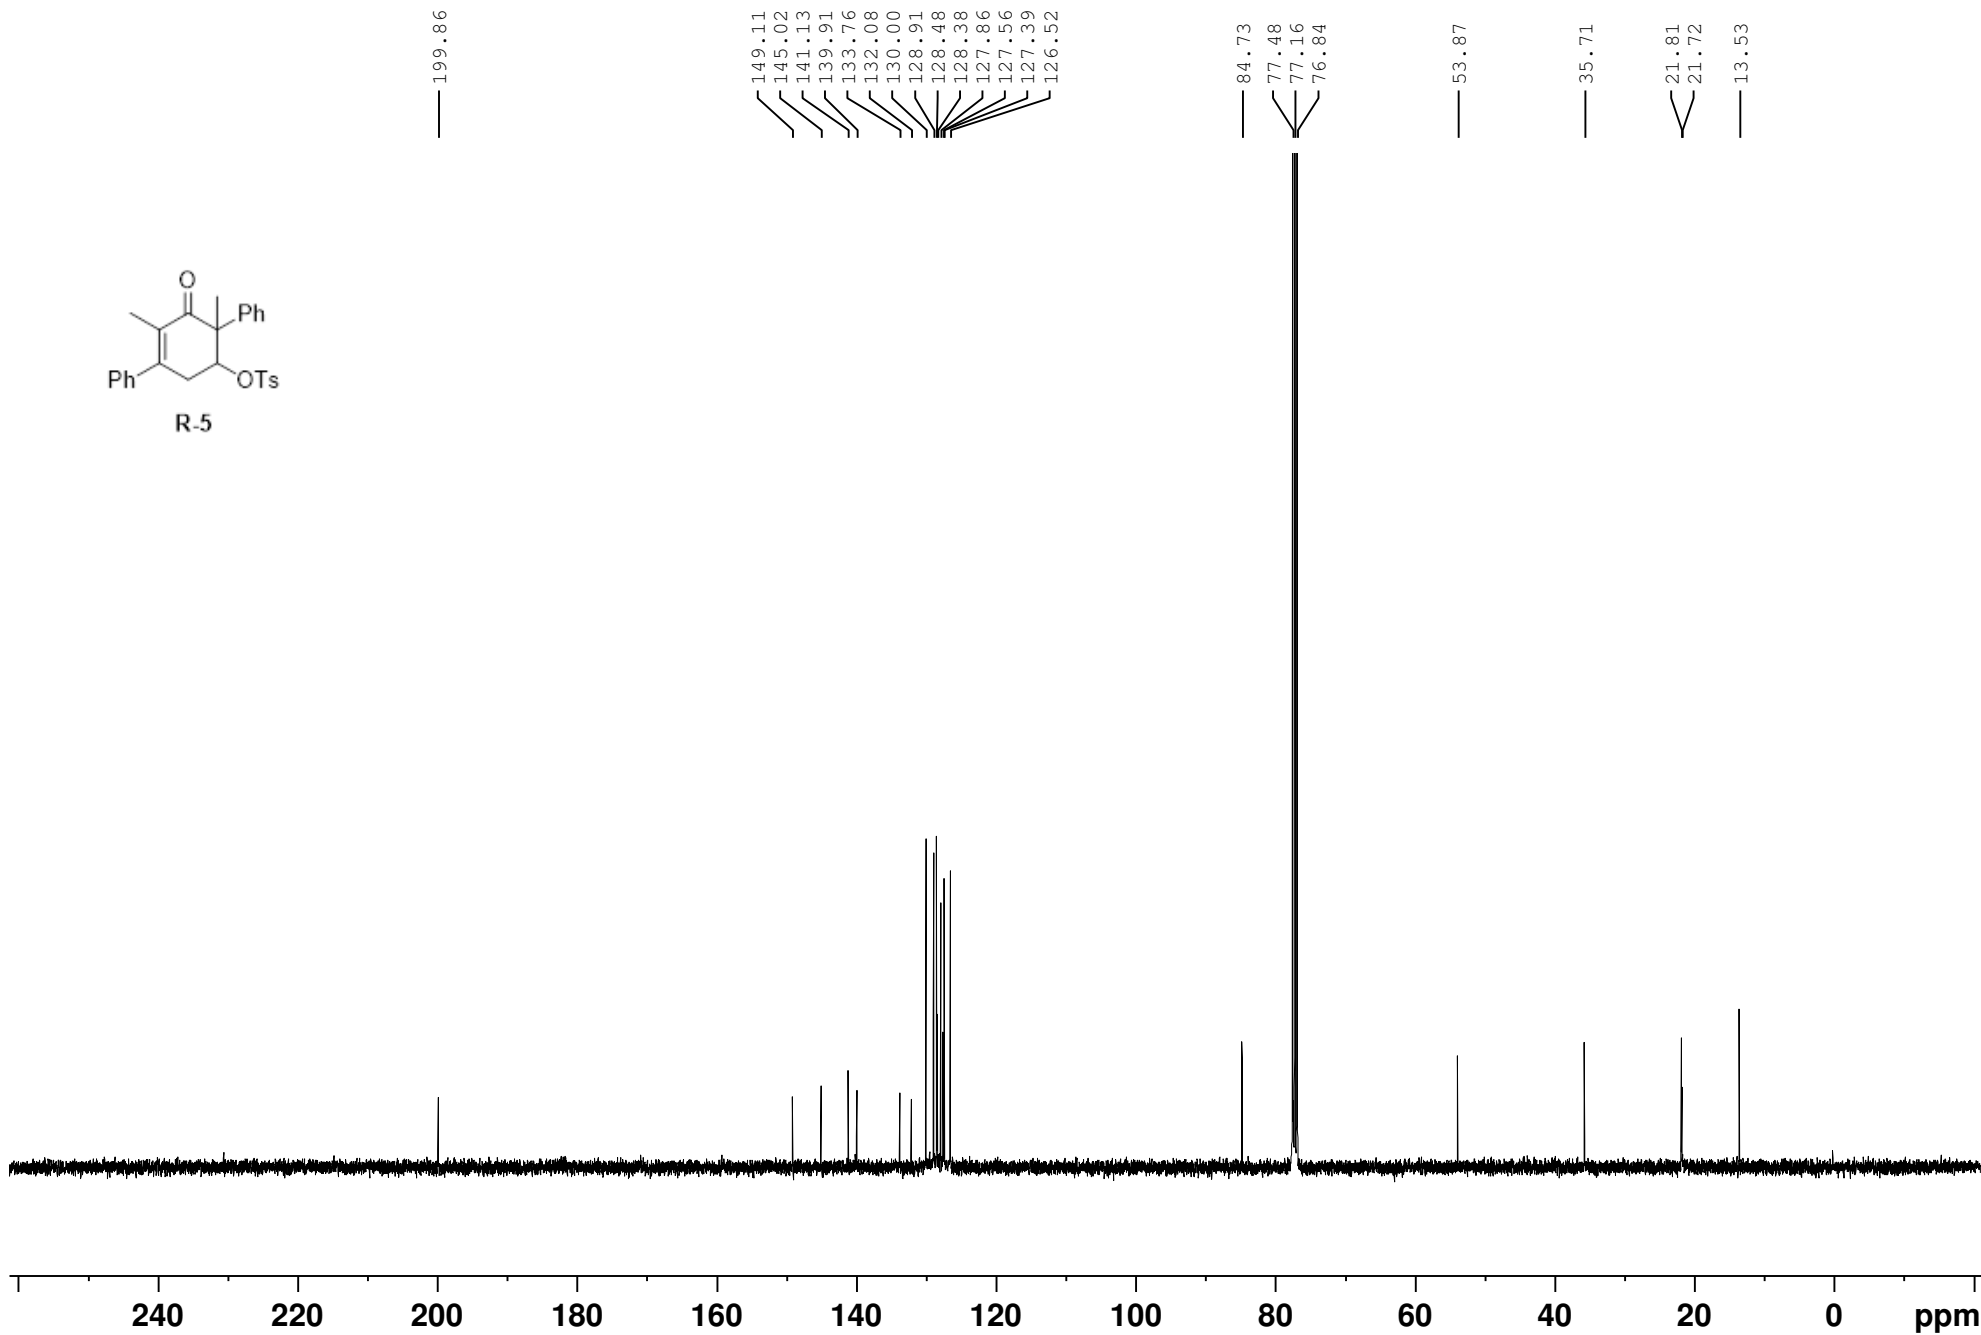

<sup>1</sup>H NMR (400 MHz, CDCl<sub>3</sub>)

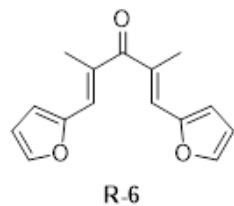

7.543  
7.540  
7.263  
6.956  
6.614  
6.606  
6.524  
6.520  
6.516  
6.512

2.256  
2.255

— 0.000

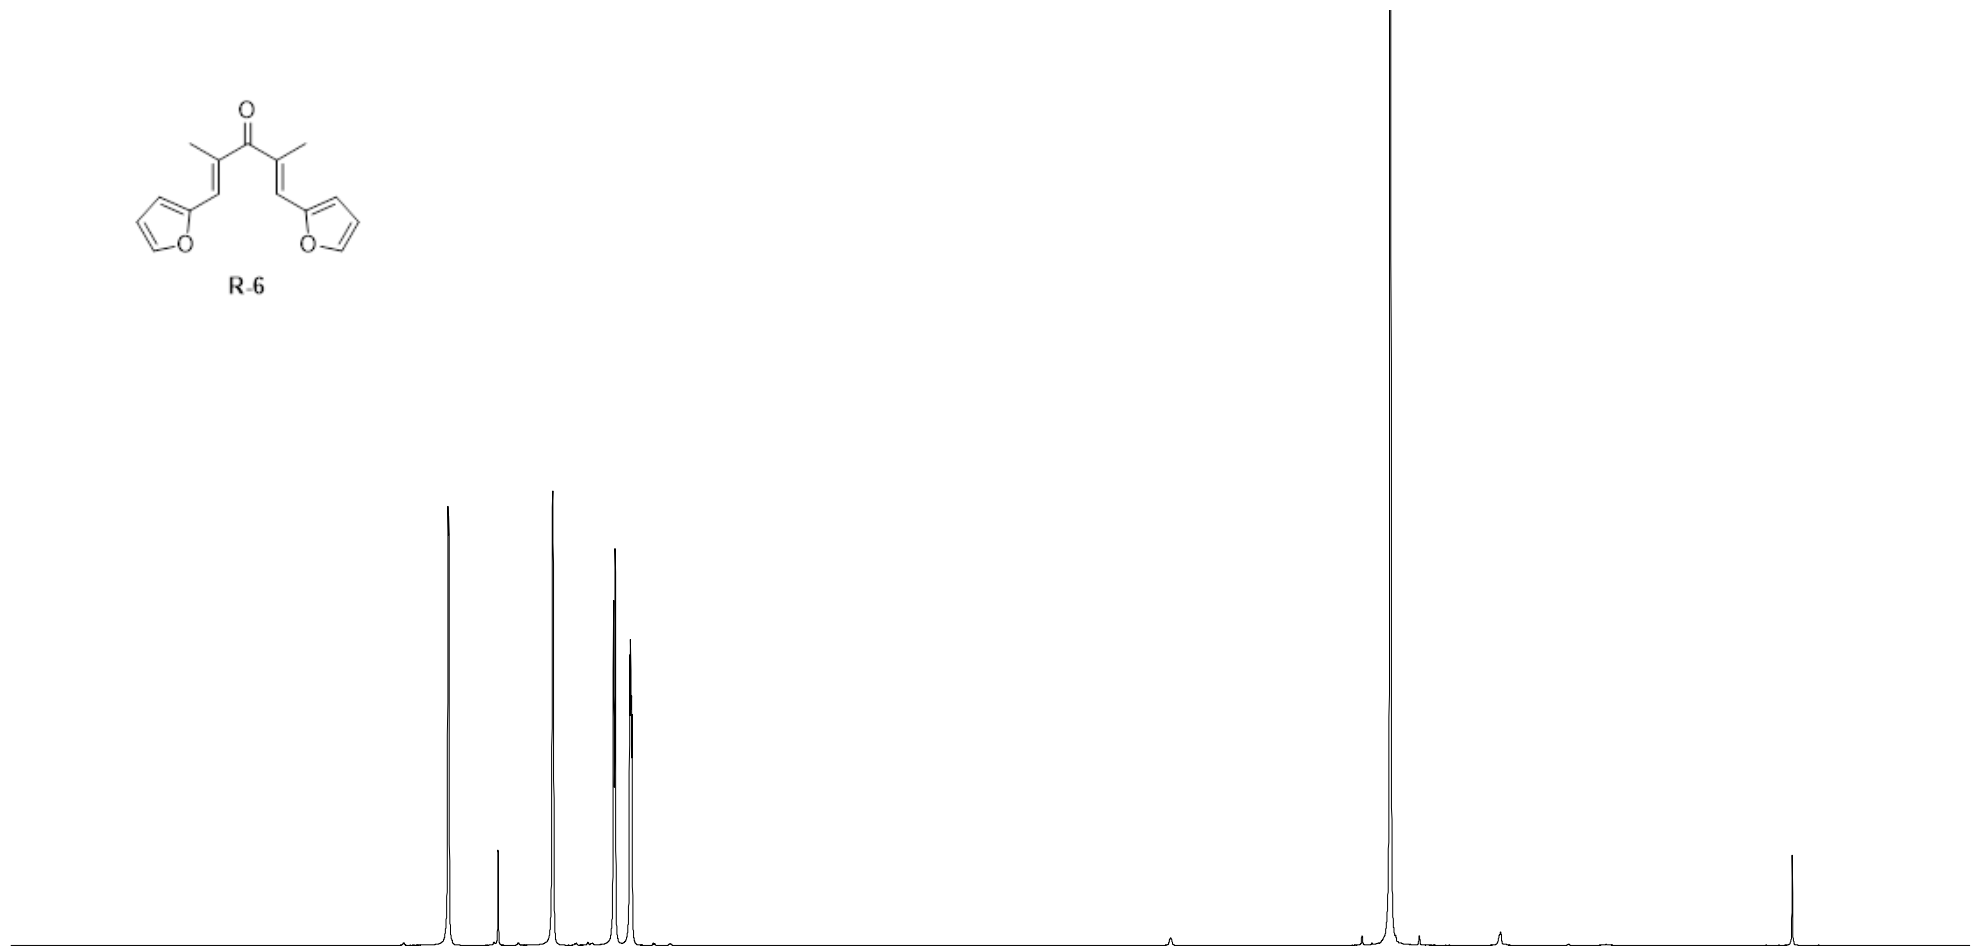

9

8

7

6

5

4

3

2

1

0

ppm

1.86

1.94

1.94

1.90

6.00

<sup>13</sup>C NMR (100 MHz, CDCl<sub>3</sub>)

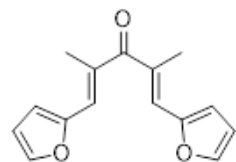

R-6

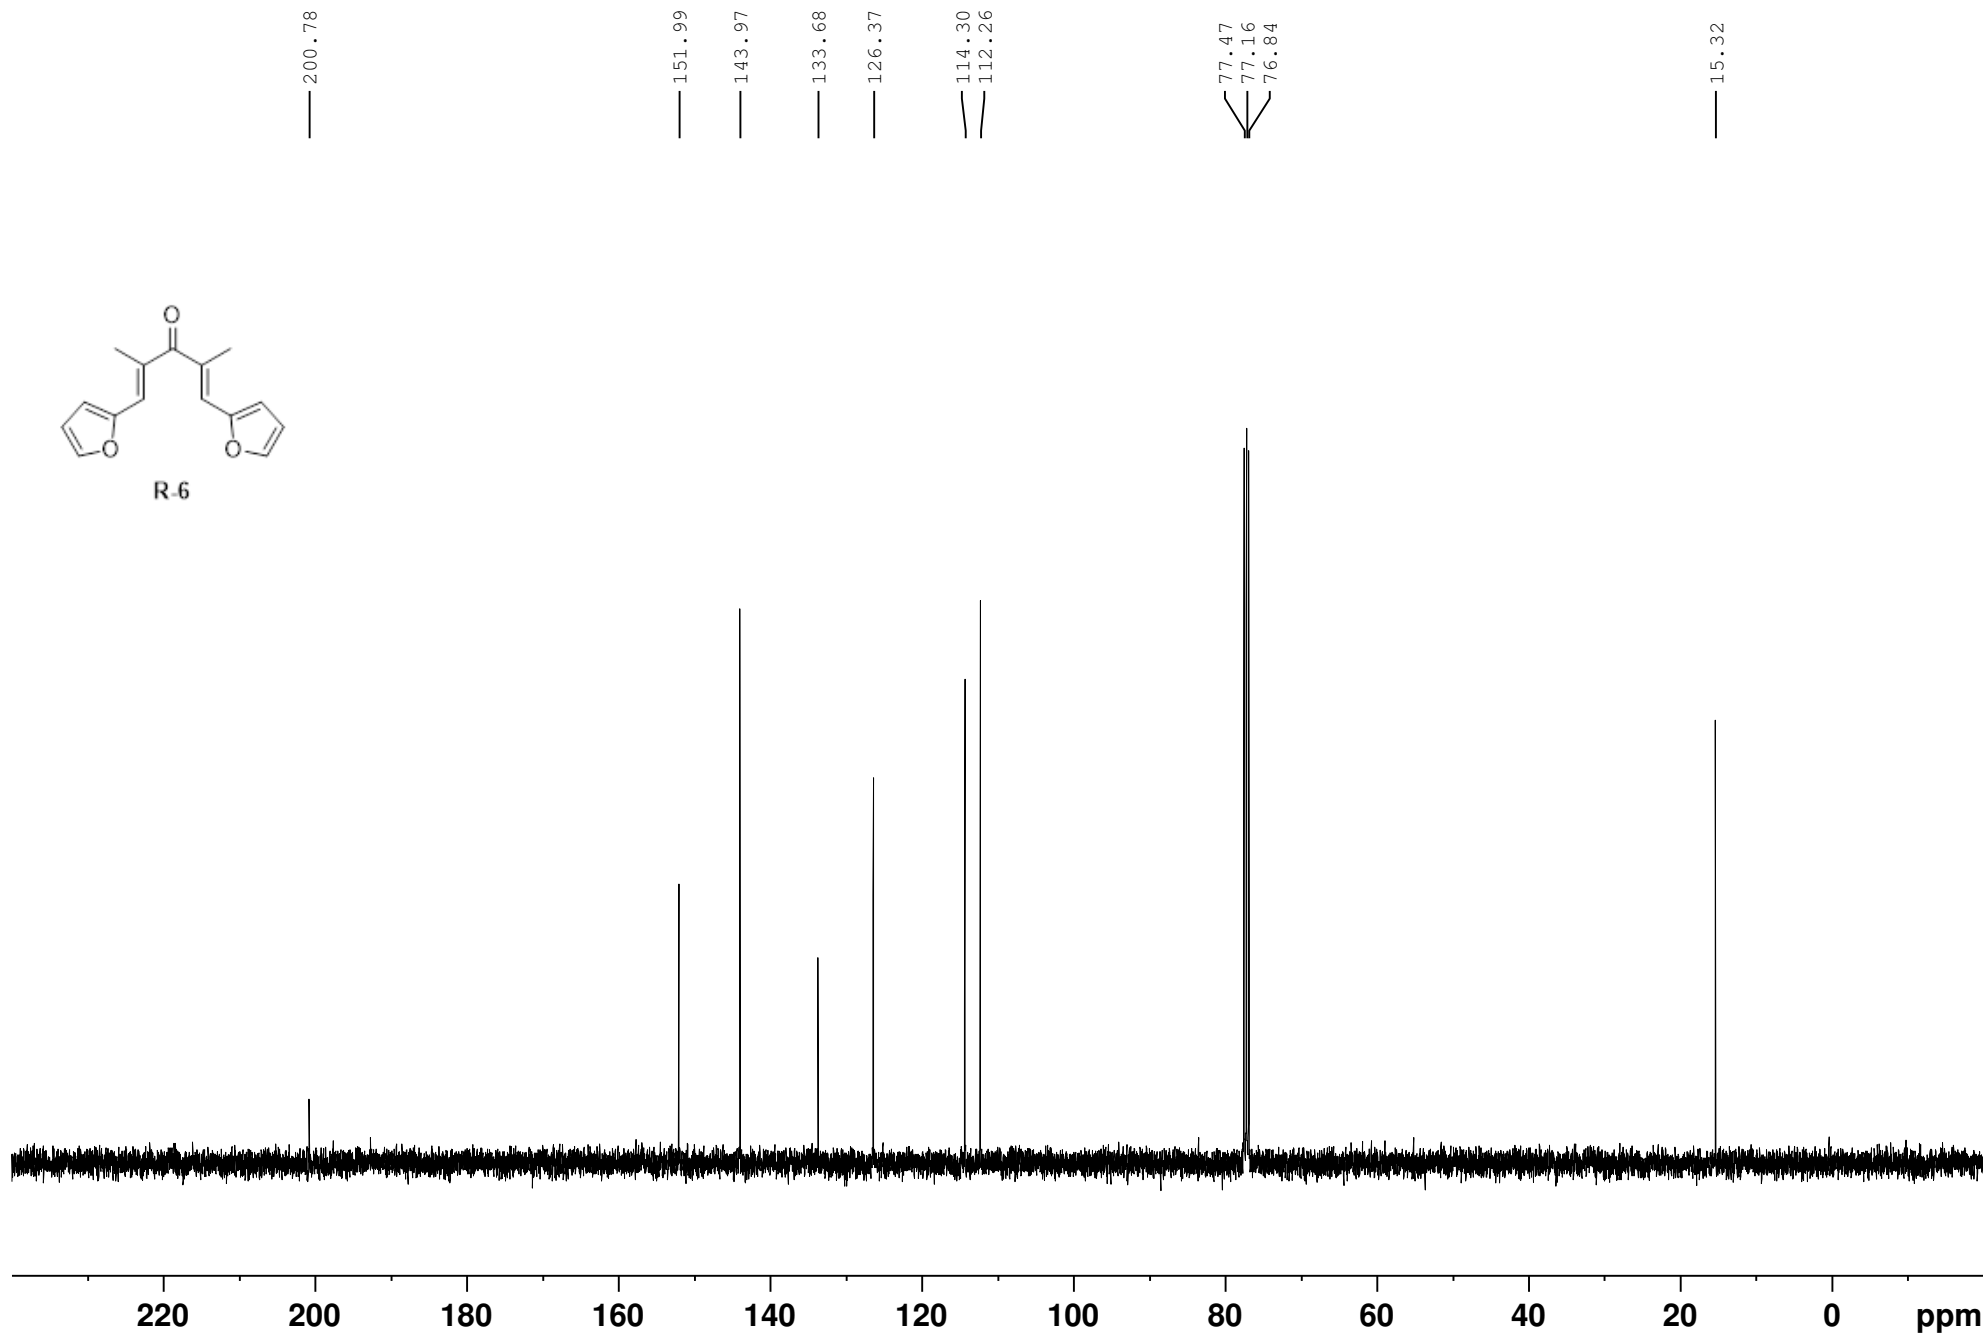



$^1\text{H}$  NMR (400 MHz,  $\text{CDCl}_3$ )

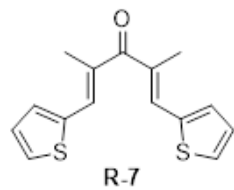

7.517  
7.504  
7.355  
7.247  
7.238  
7.136  
7.126  
7.123  
7.114

2.277

-0.000

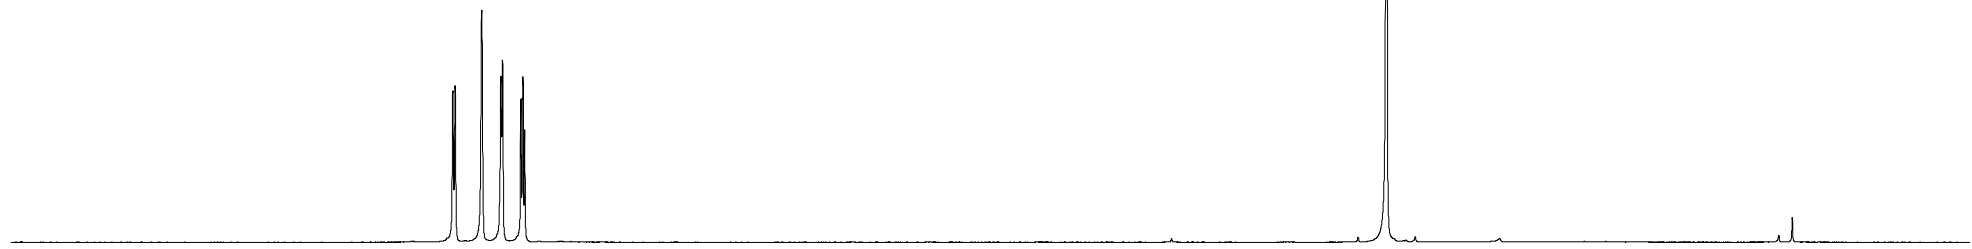

9

8

7

6

5

4

3

2

1

0

ppm

1.88  
2.00  
2.08  
1.98

6.14

$^{13}\text{C}$  NMR (100 MHz,  $\text{CDCl}_3$ )



200.92

139.54  
133.73  
132.02  
131.42  
129.21  
127.53

77.47  
77.16  
76.84

15.63

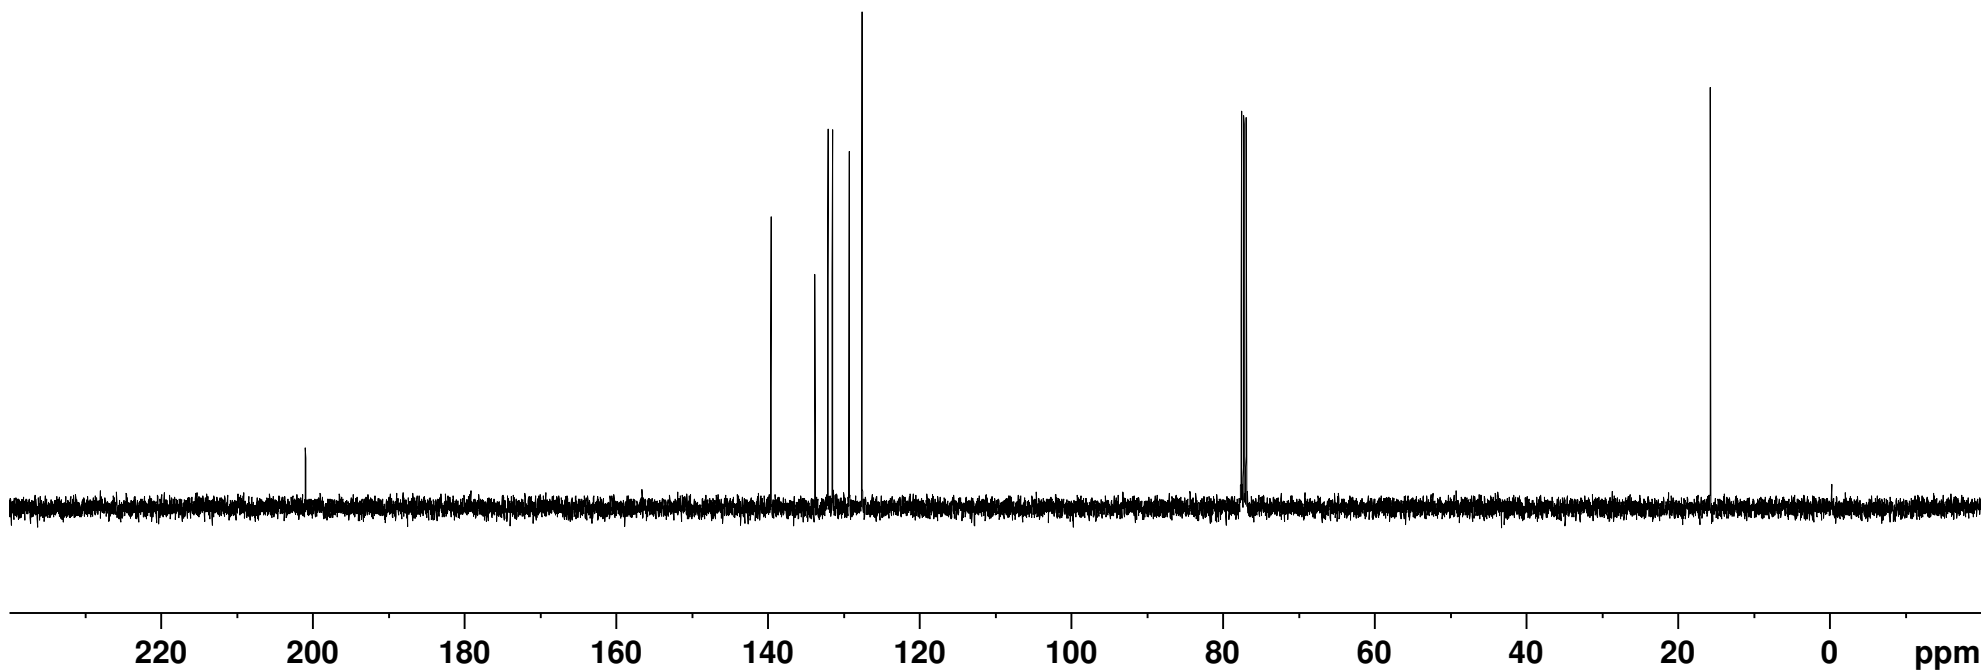

$^1\text{H}$  NMR (400 MHz,  $\text{CDCl}_3$ )

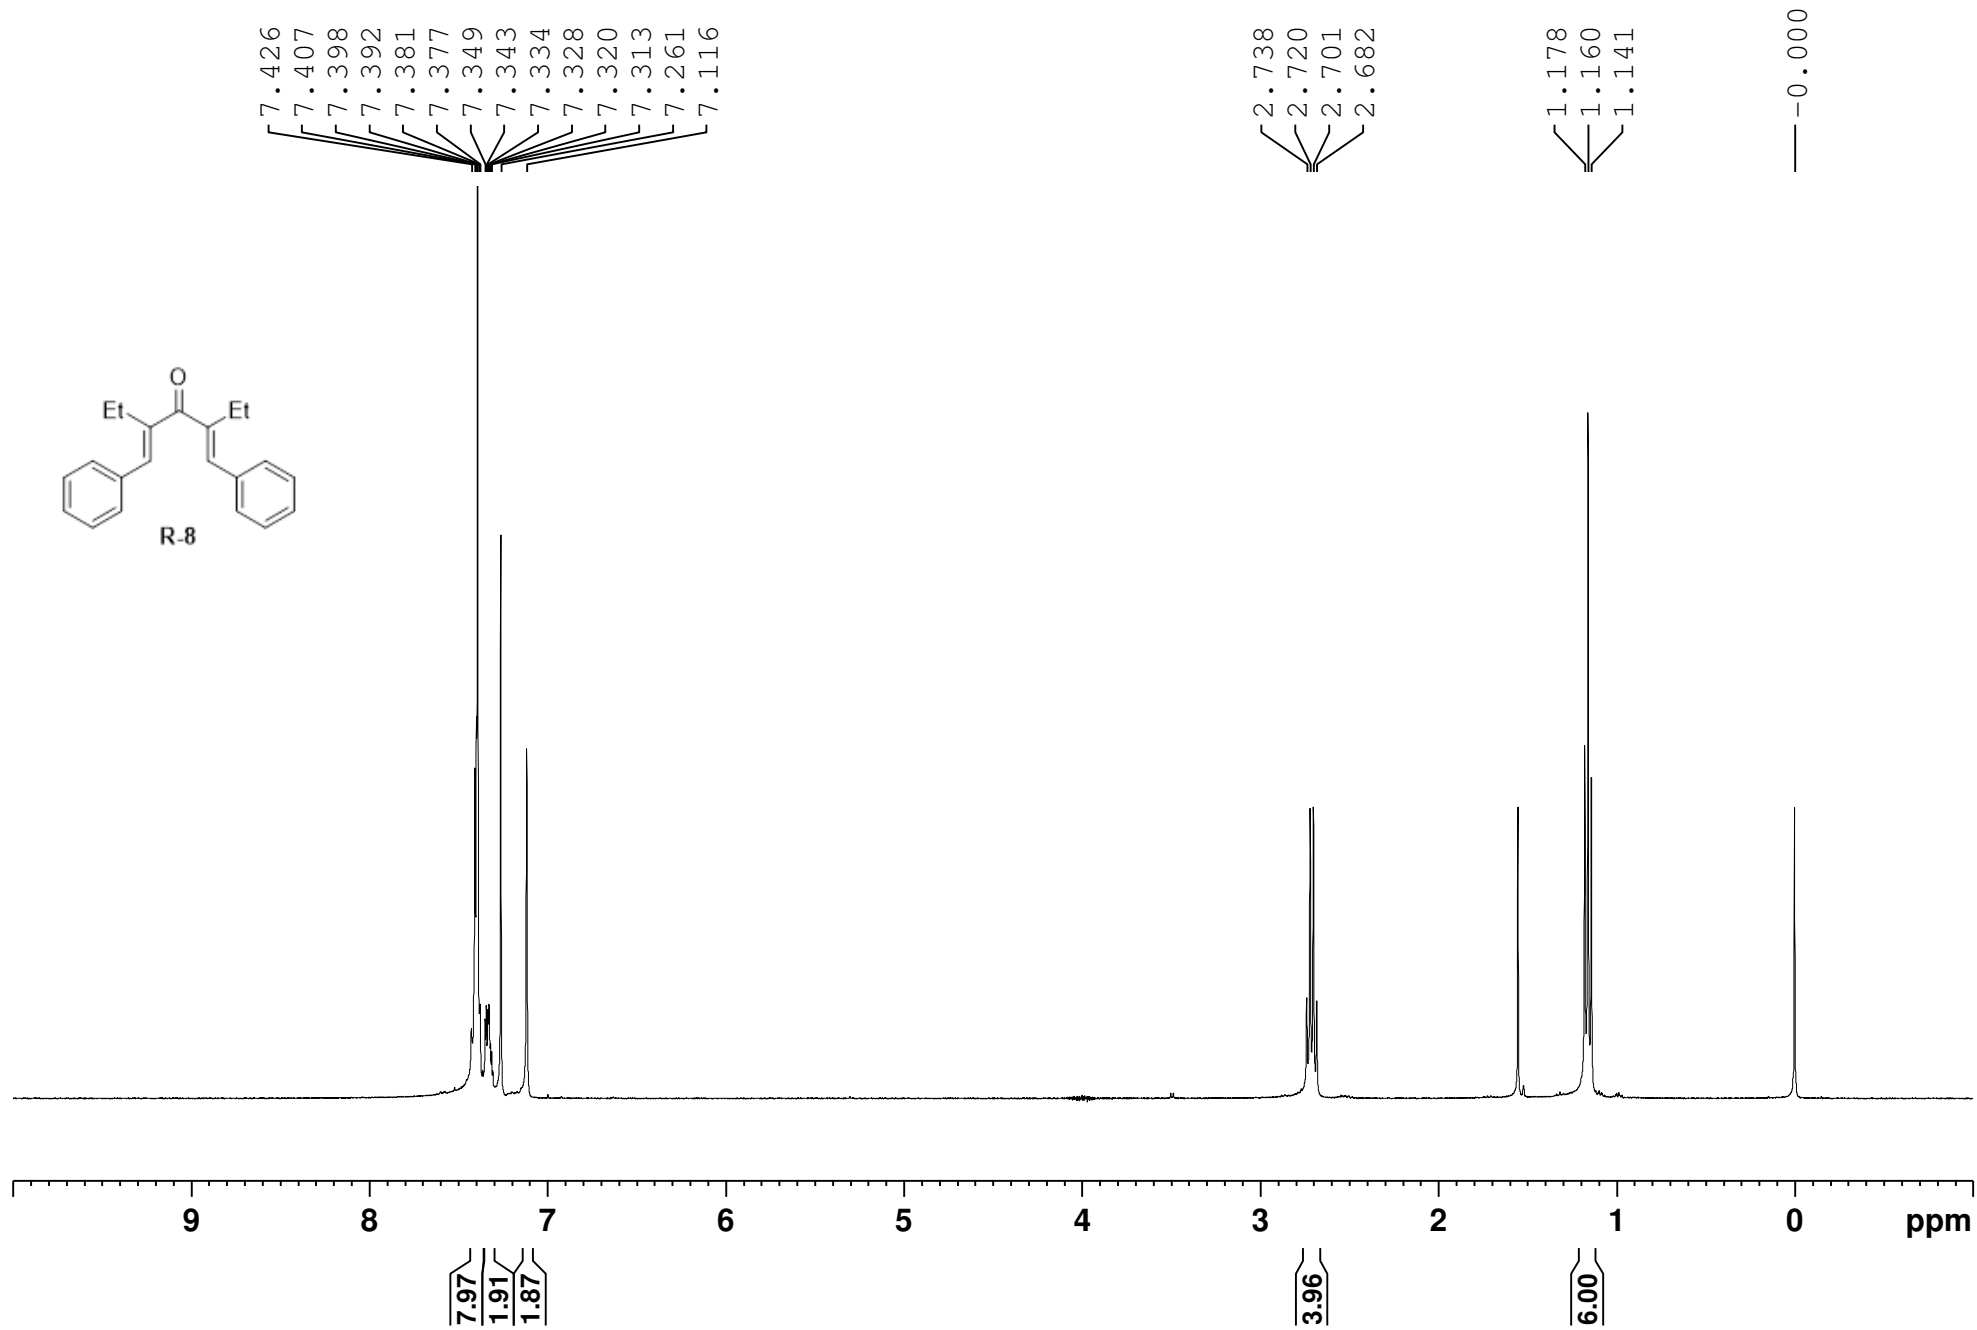

$^{13}\text{C}$  NMR (100 MHz,  $\text{CDCl}_3$ )

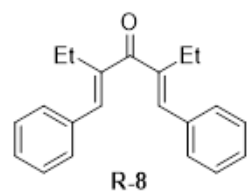

201.79

144.35  
138.17  
135.97  
129.25  
128.61  
128.33

77.48  
77.16  
76.84

21.30  
13.26

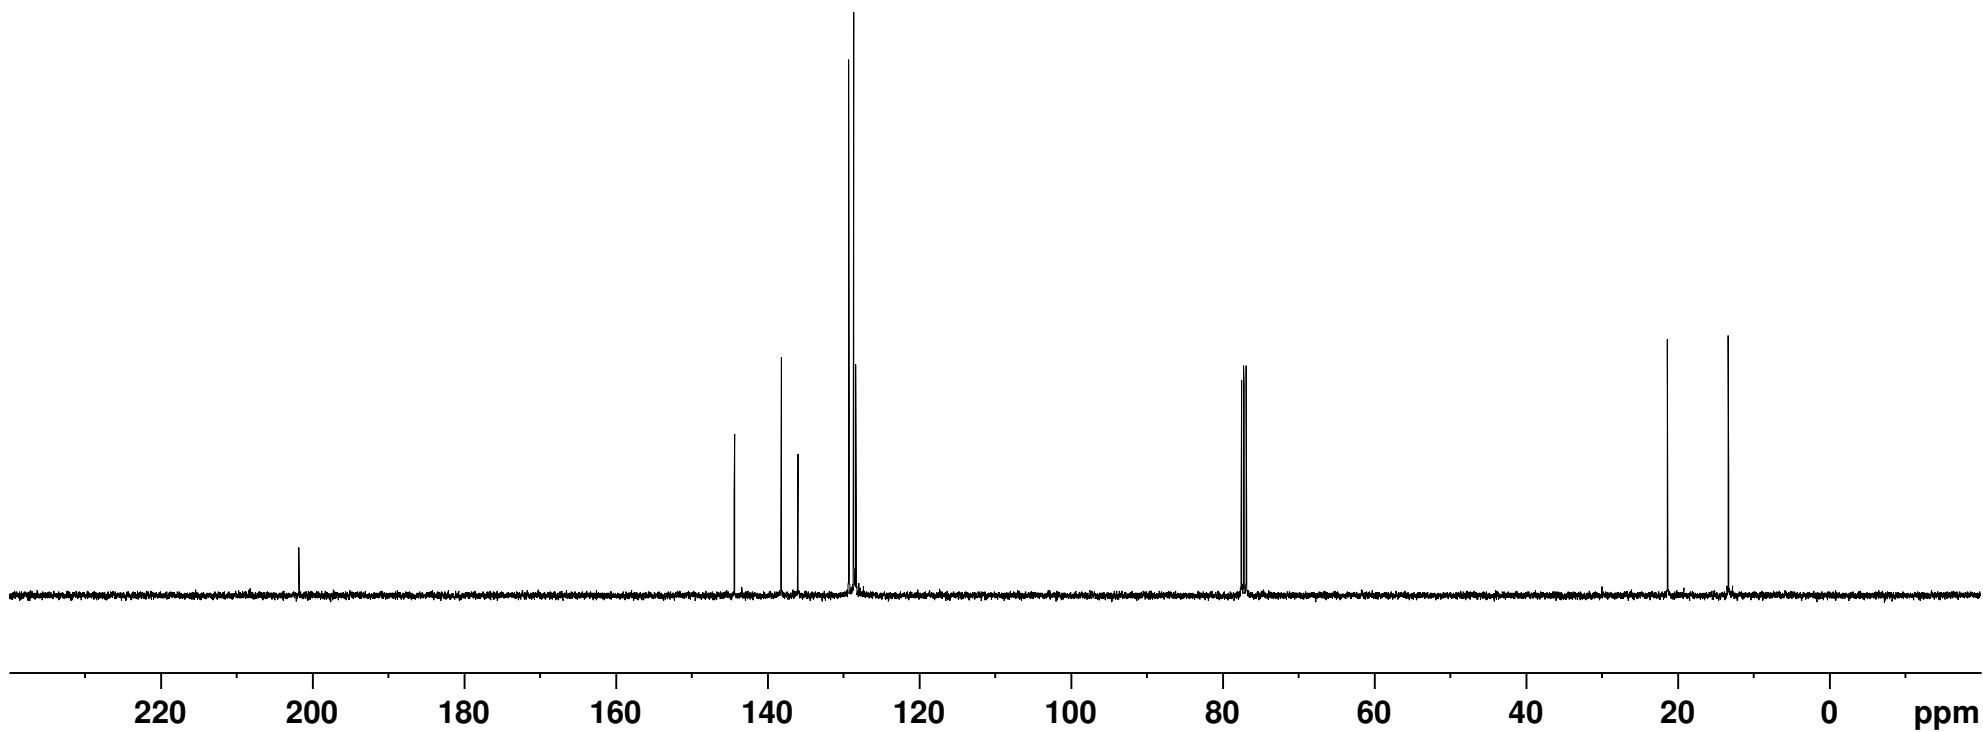

**<sup>1</sup>H NMR (400 MHz, CDCl<sub>3</sub>)**

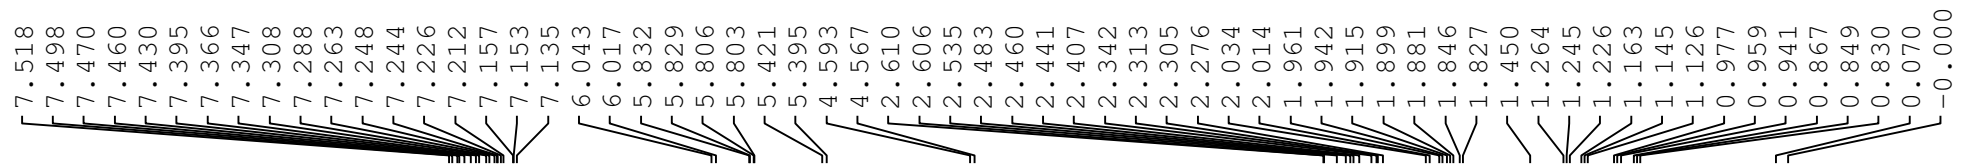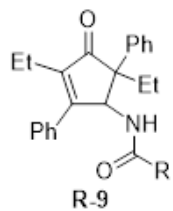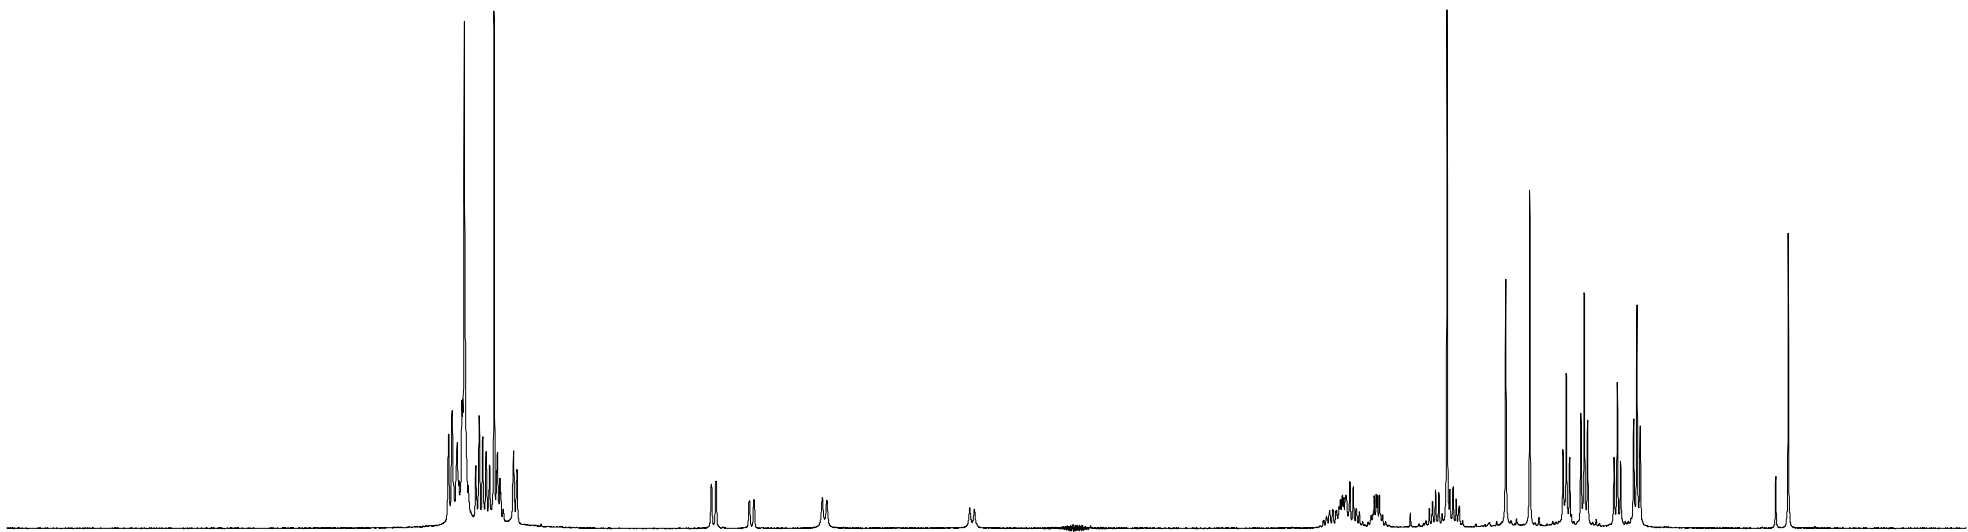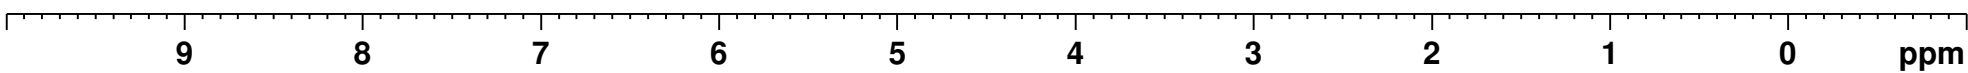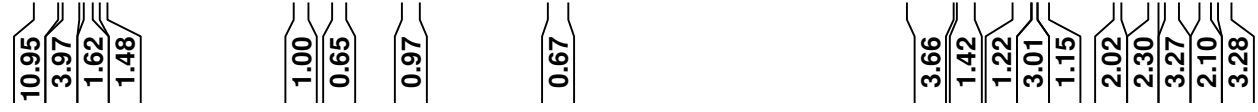

<sup>13</sup>C NMR (100 MHz, CDCl<sub>3</sub>)

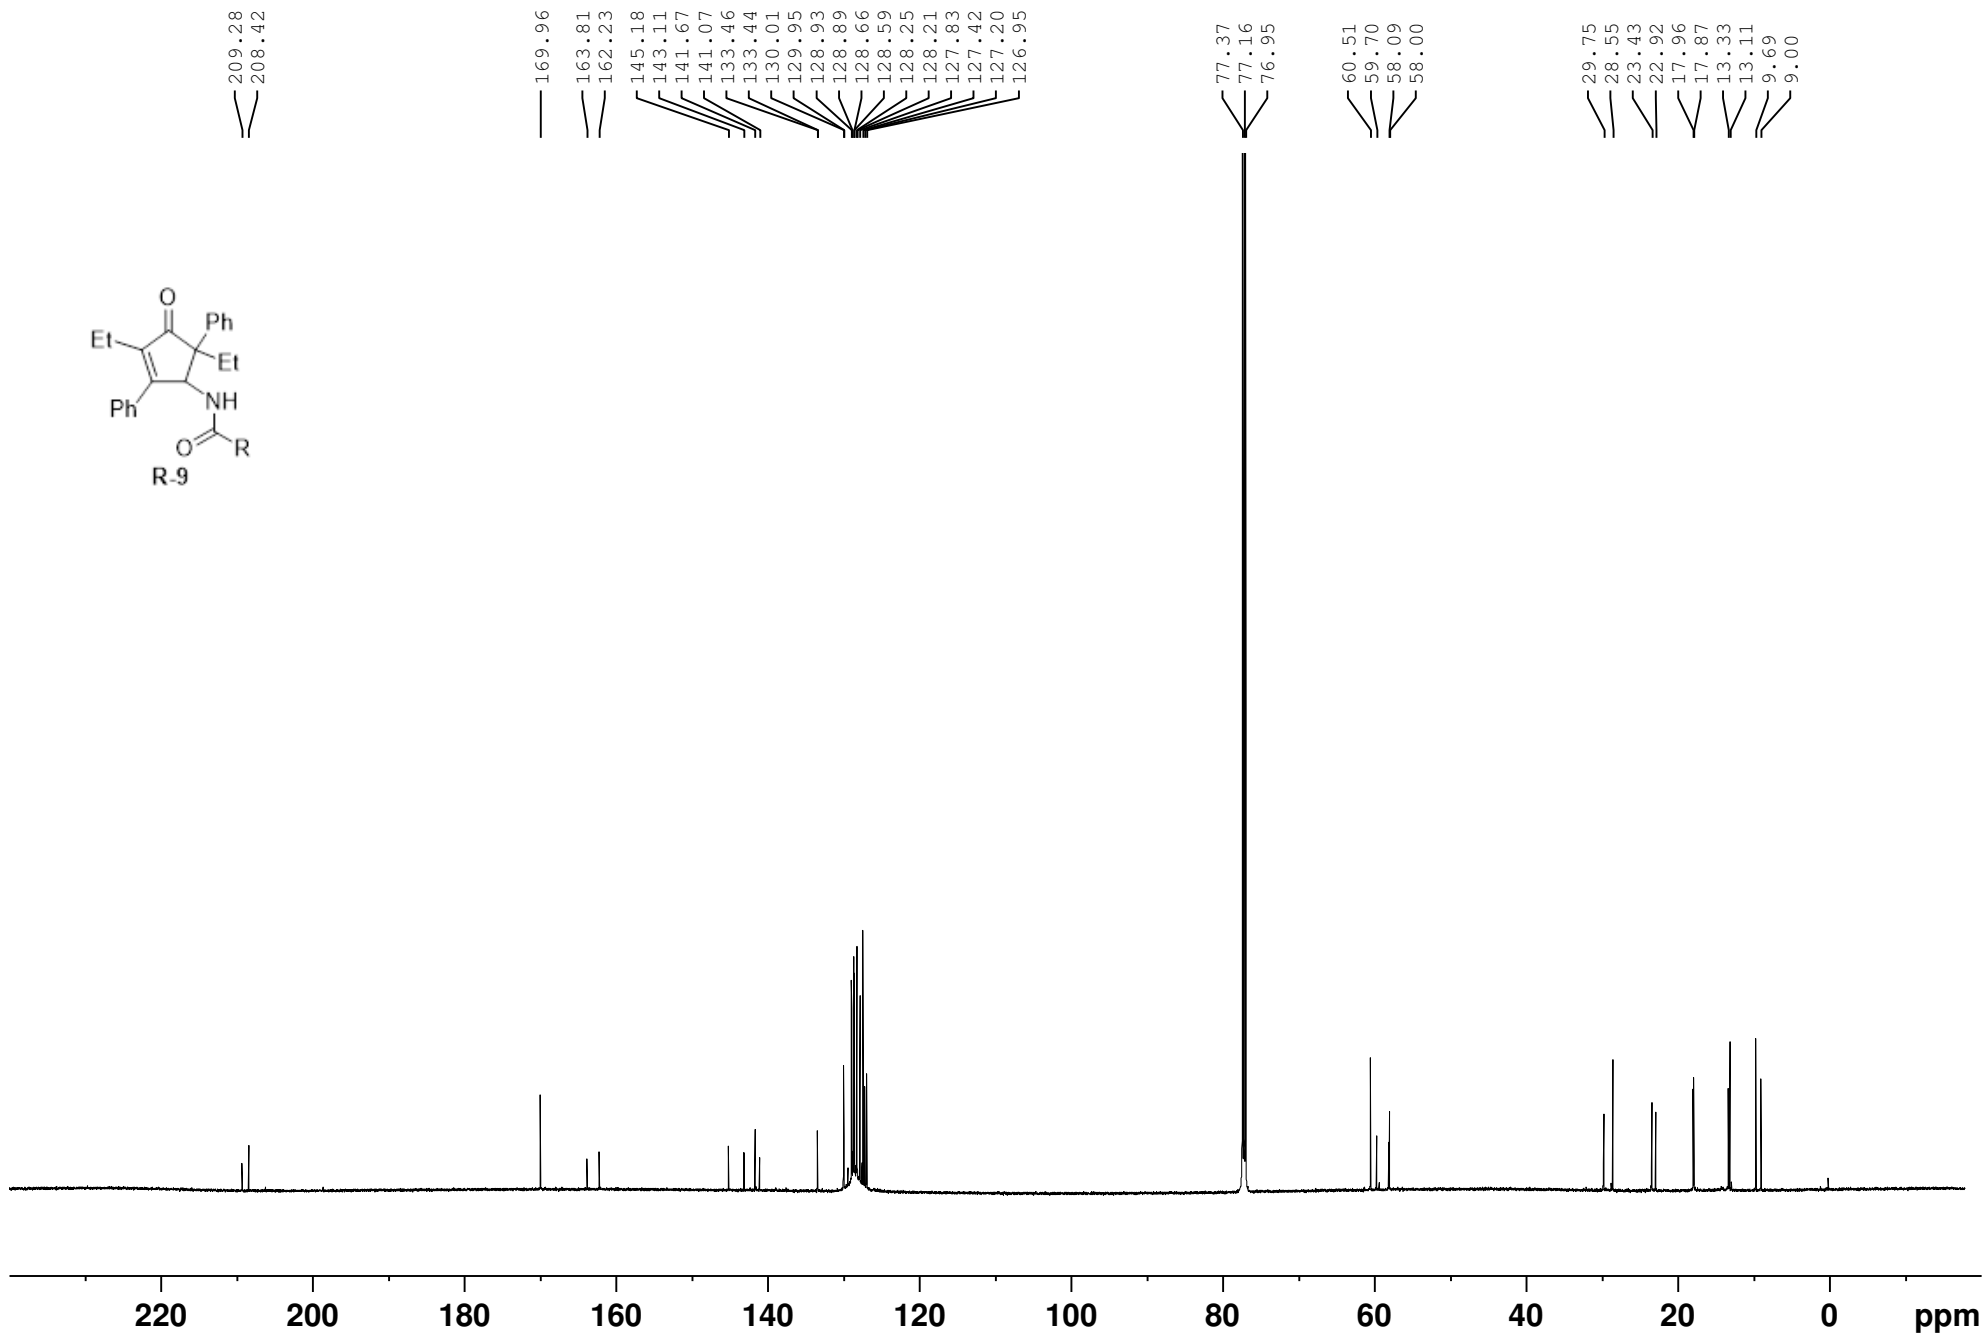

Supplement: d4cc06597b1.pdf [file d4cc06597b1.pdf]
