# Supplementary material for: One-pot Nazarov cyclization/oxidative 1,2-carbon rearrangement/Ritter reaction to access 5-quaternary-4-amidocyclopent-2-enones and 2-quaternary-3-amidoindanones
Source: Royal Society of Chemistry journal article supplement (doi:10.1039/d4cc06597b), 2025-01-01

## Supplementary Information

### **One-pot Nazarov cyclization/oxidative 1,2-carbon rearrangement/Ritter reaction to access 5-quaternary-4-amidocyclopent-2-enones and 2-quaternary-3-amidoindanones**

Yue-Hong Hu,<sup>a</sup> Yu-Ting Chen,<sup>a</sup> Zhi-Juan He,<sup>a</sup> Zhang-Yan Gan,<sup>a</sup> Ling-Hui Zhang,<sup>a</sup> Wen-Jie Xi,<sup>a</sup> Baosheng Li,<sup>b,\*</sup> and Fu-Min Zhang<sup>a,c,\*</sup>

<sup>a</sup> *State Key Laboratory of Applied Organic Chemistry & College of Chemistry and Chemical Engineering, Lanzhou University, Lanzhou 730000, China. Email: zhangfm@lzu.edu.cn.*

<sup>b</sup> *School of Chemistry and Chemical Engineering, Chongqing University, 174 Shazheng Street, Chongqing, 400044, China. E-mail: libs@cqu.edu.cn.*

<sup>c</sup> *Key Laboratory of Medicinal Chemistry for Natural Resource (Ministry of Education), Yunnan University, Kunming, 650091, China*

## Table of contents

|                                                                                             |    |
|---------------------------------------------------------------------------------------------|----|
| 1. General Information.....                                                                 | 1  |
| 2. Preparation of substrates .....                                                          | 2  |
| 2.1 General procedure for the preparation of divinyl ketones.....                           | 2  |
| 2.2 General procedure for the preparation of chalcone derivatives.....                      | 4  |
| 3. Experimental details and characterization data.....                                      | 6  |
| 3.1 Construct 2,3-disubstituted-5-quatarnary-4-amidocyclopent-2-enones from divinyl ketones | 6  |
| 3.1.1 General procedure A .....                                                             | 6  |
| 3.1.2 The details for the optimization of reaction conditions.....                          | 7  |
| 3.2 Construct 2-quatarnary-3-amidoindanones from chalcone derivatives.....                  | 9  |
| 3.2.1 General procedure B .....                                                             | 9  |
| 3.2.2 The details for the optimization of reaction conditions.....                          | 10 |
| 3.3 Some control experiments.....                                                           | 11 |
| 3.3.1 Quenching the reaction at different time.....                                         | 11 |
| 3.3.2 The Nazarov reaction of substrate <b>2a</b> .....                                     | 11 |
| 3.3.3 The reaction of compound <b>4</b> under standard reaction conditions.....             | 12 |
| 3.3.4 The reaction of byproduct <b>8</b> under standard reaction conditions .....           | 12 |
| 3.4 Explanation of the structure assignment for the two diastereoisomer.....                | 13 |
| 3.5 Characterization data of products.....                                                  | 16 |
| 4. X-Ray crystallography Data .....                                                         | 44 |
| 4.1 X-Ray crystallography of compound <b>5aa</b> .....                                      | 44 |
| 4.2 X-Ray crystallography of compound <b>5ea</b> .....                                      | 45 |
| 4.3 X-Ray crystallography of compound <b>5ga'</b> .....                                     | 46 |
| 4.4 X-Ray crystallography of compound <b>7ea</b> .....                                      | 47 |
| 4.5 X-Ray crystallography of compound <b>7ia</b> .....                                      | 48 |
| 5. References.....                                                                          | 49 |
| 6. Copies of <sup>1</sup> H and <sup>13</sup> C NMR spectra of products .....               | 49 |

## 1. General Information

Unless otherwise stated, all reagents were purchased from commercial sources and were directly used without further purification.

Dichloromethane (DCM) was purified by distillation over the CaH<sub>2</sub> indicated.

Tetrahydrofuran (THF) were dried by distillation over the Na indicated.

All reactions were monitored by thin-layer chromatography (TLC) on silica gel GF<sub>254</sub> plates using UV light as visualizing agent (if applicable), and a solution of phosphomolybdic acid (50 g/L) in EtOH followed by heating as developing agents. The products were purified by flash column chromatography on silica gel (200-300 meshes) produced by Yantai Xinnuo Chemicals Co., LTD (China).

<sup>1</sup>H NMR, <sup>13</sup>C NMR and <sup>19</sup>F NMR spectra were recorded in CDCl<sub>3</sub> solution on a Bruker AM 400 MHz instrument or 600 MHz NMR instrument. Chemical shifts were denoted in ppm ( $\delta$ ) and calibrated by using residual undeuterated solvent [CDCl<sub>3</sub> (7.26 ppm) or tetramethylsilane (0.00 ppm)] as internal reference for <sup>1</sup>H NMR and the deuterated solvent [CDCl<sub>3</sub> (77.16 ppm) or (CD<sub>3</sub>)<sub>2</sub>SO (39.52 ppm)] as internal standard for <sup>13</sup>C NMR. The following abbreviations were used to explain the multiplicities: s = singlet, d = doublet, t = triplet, br = broad, dd = double doublet, dt = doublet of triplets, m = multiplet.

The high-resolution mass spectral (HRMS) analysis data were measured on Thermo Fisher Orbitrap Elite Mass Spectrometer or a LCT Premier XE (Waters) mass spectrometer (Waters, Milford, MA, U.S.) by means of the ESI technique. Electron ionization mass spectra (EI-MS) were measured on a Shimadzu GCMSQP2010SE spectrometer by direct inlet at 70 eV and the corresponding signals were given in *m/z* with relative intensity (%) in brackets.

**Melting points** (m.p.) were measured on a Kolfer melting point apparatus (Beijing Tech Instrument Co., LTD) without calibration.

The **IR** spectra were recorded on Nicolet Nexus 670 FT-IR spectrometer.

The **X-ray** single-crystal determination were performed on an Agilent Super Nova single crystal X-ray diffractometer.

## 2. Preparation of substrates

All the nitrile substrates were commercially available. Substrates **2a**<sup>1</sup>, **2b**<sup>2</sup>, **2f**<sup>3</sup>, **2g**<sup>2</sup> were synthesized according to the previously reported methods.

### 2.1 General procedure for the preparation of divinyl ketones.

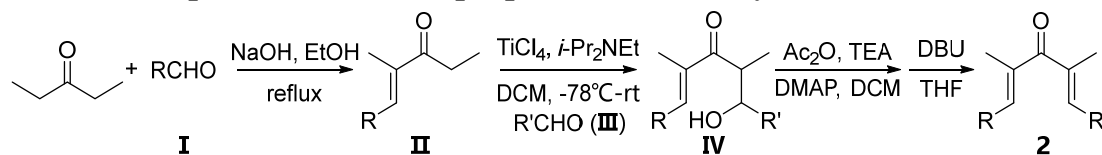

The aldehyde **I** (10 mmol) and 3-pentanone (40 mmol) were dissolved in EtOH (10 mL) and then NaOH aq. (1.3 mL, 10%) was added dropwise. The mixture was stirred at reflux for 48 h, then it was poured in ice water (100 mL), neutralized with aq. HCl (1 mol/L) and extracted with EtOAc (3 × 25 mL). The combined organic phase was washed with NaHCO<sub>3</sub> aq. (25 mL) and brine (25 mL) dried with Na<sub>2</sub>SO<sub>4</sub>, filtered, and concentrated. The crude residue was purified by column chromatography to afford the unsaturated ketone **II**.

Unsaturated ketone **II** was dissolved in dry CH<sub>2</sub>Cl<sub>2</sub> (0.15 M), and then TiCl<sub>4</sub> (1.0 equiv) and *t*Pr<sub>2</sub>NEt (1.2 equiv) was sequentially added dropwise at -78 °C. After stirring at -78 °C for 1.5 h, aldehyde **III** (1.5 equiv) was added dropwise. The solution was stirred at -78 °C for 2 h, and then allowed to slowly warm to room temperature until the starting material was disappeared completely (monitored through TLC). The reaction mixture was diluted with DCM and H<sub>2</sub>O, and the aqueous layer was extracted with DCM. The combined organic phase was successively washed with water and brine, dried with Na<sub>2</sub>SO<sub>4</sub>, filtered, and concentrated in vacuum to give the crude product. Purification of the crude product by flash column chromatography with petroleum ether/ethyl acetate as eluent to afford the hydroxy ketones **IV**.

To a solution of hydroxy ketones **IV** in DCM (0.15 M), DMAP (0.1 equiv), TEA (1.5 equiv) and Ac<sub>2</sub>O (1.2 equiv) were successively added. The reaction mixture was stirred at room temperature for 1 h and then quenched with 1 mol/L HCl solution. The aqueous layer was extracted with DCM. The organic layers were combined and successively washed with 1 mol/L HCl, water, NaHCO<sub>3</sub> solution, and brine. The organic layer was then filtered and concentrated. The crude material was then purified by flash column

chromatography to afford the corresponding acetates.

DBU (1.5 equiv) was added to a solution of the resulting acetates in THF (0.1 M), and the reaction mixture was stirred at room temperature until the starting material was disappeared completely (monitored through TLC). The reaction was quenched with 1 mol/L HCl solution. The aqueous layer was extracted with EtOAc. The organic layers were combined, successively washed with water and brine, dried with Na<sub>2</sub>SO<sub>4</sub>. The organic layer was filtered, concentrated in vacuum and purified by column chromatography to yield divinyl ketones **2**.

**Characterization data of divinyl ketones.**

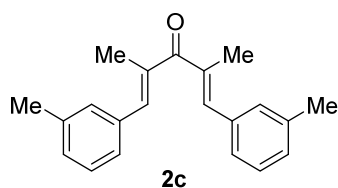

**2c**: yellowish solid, m.p. = 55.0-57.2 °C. <sup>1</sup>H NMR (400 MHz, CDCl<sub>3</sub>): δ 7.30-7.23 (m, 6 H), 7.18 (brs, 2 H), 7.12 (d, *J* = 7.2 Hz, 2 H), 2.36 (s, 6 H), 2.21 (d, *J* = 1.2 Hz, 6 H); <sup>13</sup>C NMR (100 MHz, CDCl<sub>3</sub>): δ 202.2, 139.3, 138.1, 136.8, 136.0, 130.4, 129.1, 128.4, 126.7, 21.5, 15.0; HRMS (ESI) *m/z* calculated for C<sub>21</sub>H<sub>23</sub>O [M+H]<sup>+</sup> 291.1743 found 291.1736; MS (EI) *m/z* (%): 290 (12), 155 (100), 133 (54), 105 (61), 71 (90); IR (KBr plate): 3026, 2959, 1703, 1632, 1451, 1295, 695 cm<sup>-1</sup>.

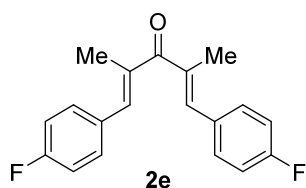

**2e**: white solid, m.p. = 119.0-121.8 °C. <sup>1</sup>H NMR (400 MHz, CDCl<sub>3</sub>): δ 7.43-7.40 (m, 4 H), 7.16-7.08 (m, 6 H), 2.19 (s, 6 H); <sup>13</sup>C NMR (100 MHz, CDCl<sub>3</sub>): δ 201.8, 162.6 (d, *J* = 247 Hz), 137.9, 136.79, 136.78, 132.1 (d, *J* = 4 Hz), 131.6 (d, *J* = 8 Hz), 115.7 (d, *J* = 22 Hz), 15.0; <sup>19</sup>F NMR (376 MHz, CDCl<sub>3</sub>): δ -112.30; HRMS (ESI) *m/z* calculated for C<sub>19</sub>H<sub>17</sub>F<sub>2</sub>O [M+H]<sup>+</sup> 299.1242 found 299.1234; MS (EI) *m/z* (%): 298 (25), 155 (27), 133 (32), 85 (85), 71 (100); IR (KBr plate): 1608, 1440, 1381, 1097, 784 cm<sup>-1</sup>.

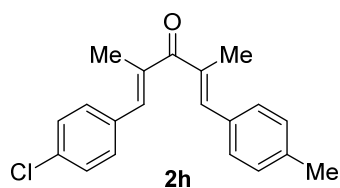

**2h:** white solid, m.p. = 67.8-69.2 °C.  $^1\text{H NMR}$  (400 MHz,  $\text{CDCl}_3$ ):  $\delta$  7.38-7.33 (m, 6 H), 7.24-7.21 (m, 3 H), 7.08 (d,  $J = 1.2$  Hz, 1 H), 2.38 (s, 3 H), 2.21 (d,  $J = 1.2$  Hz, 3 H), 2.18 (d,  $J = 1.2$  Hz, 3 H);  $^{13}\text{C NMR}$  (100 MHz,  $\text{CDCl}_3$ ):  $\delta$  201.9, 139.9, 138.7, 137.7, 136.9, 136.0, 134.5, 134.1, 133.1, 130.9, 129.8, 129.3, 128.8, 21.4, 15.2, 14.9; **HRMS** (ESI)  $m/z$  calculated for  $\text{C}_{20}\text{H}_{20}\text{ClO}$   $[\text{M}+\text{H}]^+$  311.1197 found 311.1190; **MS** (EI)  $m/z$  (%): 312 (3), 310 (11), 115 (100), 91 (35); **IR** (KBr plate): 2921, 1635, 1444, 1357, 1044, 736  $\text{cm}^{-1}$ .

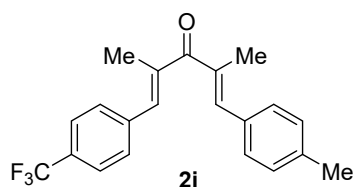

**2i:** white solid, m.p. = 39.5-40.2 °C.  $^1\text{H NMR}$  (400 MHz,  $\text{CDCl}_3$ ):  $\delta$  7.65 (d,  $J = 8.4$  Hz, 2 H), 7.51 (d,  $J = 8.4$  Hz, 2 H), 7.36 (d,  $J = 8.0$  Hz, 2 H), 7.28 (brs, 1 H), 7.23 (d,  $J = 8.0$  Hz, 2 H), 7.11 (brs, 1 H), 2.38 (s, 3 H), 2.23 (d,  $J = 0.8$  Hz, 3 H), 2.21 (d,  $J = 0.8$  Hz, 3 H);  $^{13}\text{C NMR}$  (100 MHz,  $\text{CDCl}_3$ ): 201.6, 140.6, 139.7, 139.3, 138.9, 135.8, 133.0, 129.88 (q,  $J = 33$  Hz), 129.89, 129.7, 129.3, 125.4 (q,  $J = 4$  Hz), 124.1 (q,  $J = 270$  Hz), 21.4, 15.4, 14.7;  $^{19}\text{F NMR}$  (376 MHz,  $\text{CDCl}_3$ ):  $\delta$  -62.56; **HRMS** (ESI)  $m/z$  calculated for  $\text{C}_{21}\text{H}_{20}\text{F}_3\text{O}$   $[\text{M}+\text{H}]^+$  345.1461 found 345.1452; **MS** (EI)  $m/z$  (%): 344 (2), 145 (6), 91 (74), 85 (100); **IR** (KBr plate): 2924, 1639, 1390, 1244, 1044, 749  $\text{cm}^{-1}$ .

## 2.2 General procedure for the preparation of chalcone derivatives.

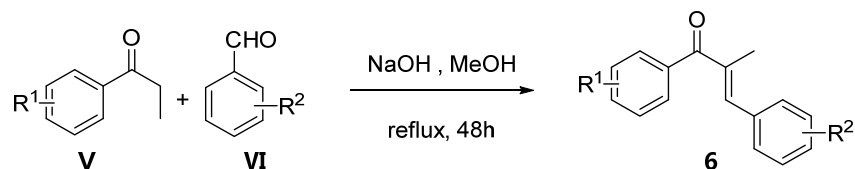

To a stirred solution of ketone **V** (10 mmol) in methanol (5 mL), a solution of sodium hydroxide (13 mmol) in methanol (10 mL) was added dropwise. After stirring at room temperature for 15 minutes, substituted benzaldehydes **VI** (10 mmol) was added and the mixture was heated to reflux for 48 h. The reaction was quenched with water (40

mL) and extracted with ethyl acetate (40 mL×3). The combined organic layer was dried over Na<sub>2</sub>SO<sub>4</sub>, concentrated, and purified through silica gel column chromatography using a mixture of ethyl acetate and petroleum ether as eluent to afford the corresponding chalcone derivatives **6**.

The NMR spectra data of compound **6a**<sup>4</sup>, **6b**<sup>4</sup>, **6c**<sup>5</sup>, **6d**<sup>4</sup>, **6e**<sup>4</sup>, **6f**<sup>6</sup>, **6h**<sup>5</sup>, **6i**<sup>4</sup>, **6k**<sup>4</sup>, **6m**<sup>4</sup>, **6n**<sup>7</sup>, are consistent with the literatures, respectively.

#### Characterization data of chalcone derivatives.

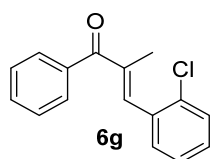

**6g**: White solid, m.p. = 43.1-45.0 °C. <sup>1</sup>H NMR (400 MHz, CDCl<sub>3</sub>): δ 7.86-7.84 (m, 2 H), 7.58-7.54 (m, 1 H), 7.49-7.39 (m, 4 H), 7.33-7.26 (m, 3 H), 2.13 (d, *J* = 1.6 Hz, 3 H); <sup>13</sup>C NMR (100 MHz, CDCl<sub>3</sub>): δ 199.2, 138.7, 138.4, 138.0, 134.5, 134.2, 132.2, 130.4, 129.8, 129.72, 129.66, 128.4, 126.7, 14.4; HRMS (ESI) *m/z* calculated for C<sub>16</sub>H<sub>13</sub>ClNaO [M+Na]<sup>+</sup> 279.0547 found 279.0550; MS (EI) *m/z* (%): 256 (4), 221 (83), 115 (49), 105 (100), 77 (85); IR (KBr plate): 2924, 1650, 1468, 1260, 1055, 766 cm<sup>-1</sup>.

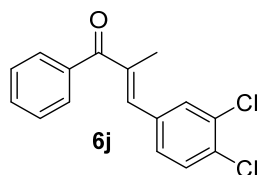

**6j**: White solid, m.p. = 68.2-70.0 °C. <sup>1</sup>H NMR (400 MHz, CDCl<sub>3</sub>): δ 7.74-7.72 (m, 2 H), 7.56-7.52 (m, 1 H), 7.47-7.44 (m, 4 H), 7.23 (dd, *J* = 8.4 Hz, 2.0 Hz, 1 H), 7.02 (s, 1 H), 2.23 (d, *J* = 1.2 Hz, 3 H); <sup>13</sup>C NMR (100 MHz, CDCl<sub>3</sub>): δ 198.7, 138.7, 138.5, 137.9, 135.8, 132.7, 132.5, 132.0, 131.3, 130.5, 129.5, 128.8, 128.4, 14.6; HRMS (ESI) *m/z* calculated for C<sub>16</sub>H<sub>13</sub>Cl<sub>2</sub>O [M+H]<sup>+</sup> 291.0338 found 291.0333; MS (EI) *m/z* (%): 290 (13), 133 (63), 85 (100), 77 (28); IR (KBr plate): 2961, 1648, 1447, 1261, 1076, 750 cm<sup>-1</sup>.

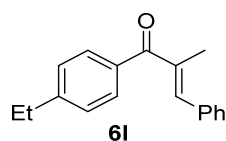

**6i**: Slightly yellow liquid. <sup>1</sup>H NMR (400 MHz, CDCl<sub>3</sub>): δ 7.72-7.70 (m, 2 H), 7.43-7.38

(m, 4 H), 7.34-7.30 (m, 1 H), 7.28 (d,  $J = 8$  Hz, 2 H), 7.17 (s, 1 H), 2.72 (q,  $J = 7.6$  Hz, 2 H), 2.27 (s, 3 H), 1.28 (t,  $J = 7.6$  Hz, 3 H);  $^{13}\text{C}$  NMR (100 MHz,  $\text{CDCl}_3$ ):  $\delta$  199.3, 148.7, 141.4, 137.1, 136.03, 136.60, 130.0, 129.8, 128.6, 127.8, 29.0, 15.4, 14.7; HRMS (ESI)  $m/z$  calculated for  $\text{C}_{18}\text{H}_{18}\text{ONa}$   $[\text{M}+\text{Na}]^+$  273.1250 found 273.1249; MS (EI)  $m/z$  (%): 250 (21), 127 (68), 105 (11), 85 (100), 71 (82); IR (KBr plate): 2962, 1645, 1450, 1262, 1076, 764  $\text{cm}^{-1}$ .

### 3. Experimental details and characterization data

#### 3.1 Construct 2,3-disubstituted-5-quaternary-4-amidocyclopent-2-enones from divinyl ketones

##### 3.1.1 General procedure A

Unless otherwise stated, the general procedure is as follows: to a 10 mL sealed tube containing a magnetic stir bar were added sequentially divinyl ketones (0.2 mmol), *p*-TsOH $\cdot$ H<sub>2</sub>O (114.1 mg, 0.6 mmol) and nitrile (1 mL) at room temperature, then the mixture was placed in a preheated oil bath at 60 °C and stirred for the indicated time. After the indicated time, the reaction mixture was cooled down to room temperature, HTIB ([hydroxy(tosyloxy)iodo]benzene, 156.9 mg, 0.4 mmol) was added and the mixture was stirred at 60 °C and stirred for the indicated time. The reaction mixture was cooled to room temperature, diluted with DCM (15.0 mL) and H<sub>2</sub>O (15.0 mL), and the aqueous layer was extracted with DCM. The combined organic phase was successively washed with water and brine, dried with  $\text{Na}_2\text{SO}_4$ , filtered, and concentrated in vacuum. The residues were purified by flash column chromatography on silica gel (DCM/ $\text{CH}_3\text{OH}$  or petroleum ether/ethyl acetate) to afford the desired product.



### 3.1.2 The details for the optimization of reaction conditions

**Table S1** The screening of acid<sup>a</sup>

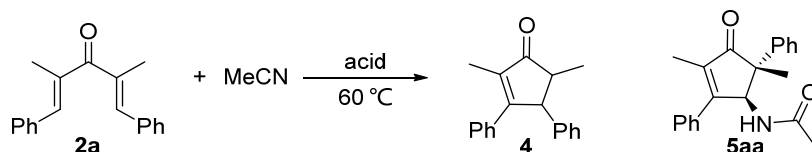

| Entry | Acid                               | T/ °C        | Solvent            | dr of <b>4</b> | Yield of <b>4</b> <sup>b</sup> /% | Yield of <b>5aa</b> /% |
|-------|------------------------------------|--------------|--------------------|----------------|-----------------------------------|------------------------|
| 1     | <i>p</i> -TsOH                     | 60 (30 min)  | CH <sub>3</sub> CN | 6.4:1          | 93 <sup>c</sup>                   | ND                     |
| 2     | TfOH                               | 60 (30 min)  | CH <sub>3</sub> CN | 5.6:1          | 40                                | ND                     |
| 3     | HBF <sub>4</sub> ·H <sub>2</sub> O | 60 (40 min)  | CH <sub>3</sub> CN | 3.7:1          | 86                                | ND                     |
| 4     | HCl                                | 60 (30 min)  | CH <sub>3</sub> CN | 7.7:1          | 99                                | ND                     |
| 5     | H <sub>2</sub> SO <sub>4</sub>     | 60 (40 min)  | CH <sub>3</sub> CN | 7.7:1          | 56                                | ND                     |
| 6     | BF <sub>3</sub> ·Et <sub>2</sub> O | 60 (2.5 min) | CH <sub>3</sub> CN |                | 4                                 | ND                     |
| 7     | TMSOTf                             | 60 (30 min)  | CH <sub>3</sub> CN | 5.9:1          | 43                                | ND                     |
| 8     | Fe(OTf) <sub>3</sub>               | 60 (24 h)    | CH <sub>3</sub> CN |                | trace                             | trace                  |
| 9     | TiCl <sub>4</sub>                  | 60 (40 min)  | CH <sub>3</sub> CN | 6.3:1          | 72                                | ND                     |

<sup>a</sup>Otherwise specified, the reactions were performed using **2a** (0.2 mmol), acid (2.0 equiv.), in 1.0 mL CH<sub>3</sub>CN at the noted temperature. <sup>b</sup>NMR yield. <sup>c</sup>Isolated yield.

**Table S2** The screening of Oxidant<sup>a</sup>

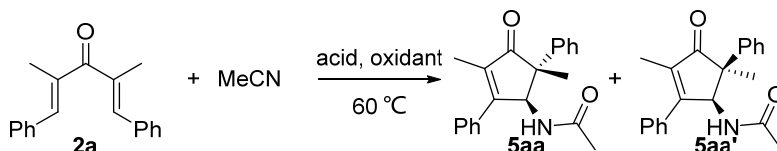

| Entry | Acid                 | T/ °C     | Solvent            | Oxidant     | dr    | Yield <sup>b</sup> /% |
|-------|----------------------|-----------|--------------------|-------------|-------|-----------------------|
| 1     | Fe(OTf) <sub>3</sub> | 60 (24 h) | CH <sub>3</sub> CN | Selectfluor |       | 2                     |
| 2     | Fe(OTf) <sub>3</sub> | 60 (24 h) | CH <sub>3</sub> CN | DDQ         |       | decomposition         |
| 3     | Fe(OTf) <sub>3</sub> | 60 (24 h) | CH <sub>3</sub> CN | PIDA        |       | 12                    |
| 4     | Fe(OTf) <sub>3</sub> | 60 (24 h) | CH <sub>3</sub> CN | PhIO        |       | 13                    |
| 5     | Fe(OTf) <sub>3</sub> | 60 (24 h) | CH <sub>3</sub> CN | PIFA        |       | 12                    |
| 6     | Fe(OTf) <sub>3</sub> | 60 (24 h) | CH <sub>3</sub> CN | HTIB        |       | 18                    |
| 7     | HCl                  | 60 (48 h) | CH <sub>3</sub> CN | HTIB        |       | ND                    |
| 8     | <i>p</i> -TsOH       | 60 (48 h) | CH <sub>3</sub> CN | HTIB        | 4.8:1 | 31 <sup>c</sup>       |

<sup>a</sup>Otherwise specified, the reactions were performed using **2a** (0.2 mmol), acid (2.0 equiv.) and oxidant (2.0 equiv.) in 1.0 mL CH<sub>3</sub>CN at the noted temperature. <sup>b</sup>NMR yield. <sup>c</sup>Isolated yield.

**Table S3** The details of the optimal reaction conditions<sup>a</sup>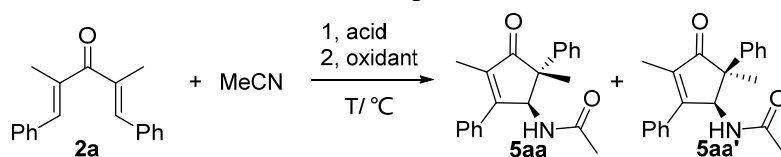

| Entry           | Acid                                  | T <sub>1</sub> / °C (time) | Oxidant                                        | T <sub>2</sub> / °C (time) | dr                 | Yield <sup>b</sup> /% |
|-----------------|---------------------------------------|----------------------------|------------------------------------------------|----------------------------|--------------------|-----------------------|
| 1               | <i>p</i> -TsOH <sup>c</sup>           | 60 (20 min)                | <b>HTIB</b>                                    | 60 (48 h)                  | 5.3:1              | 60                    |
| 2               | <i>p</i> -TsOH                        | 60 (20 min)                | <b>HTIB</b>                                    | 60 (48 h)                  | 5.2:1              | 64                    |
| 3               | <i>p</i> -TsOH                        | 60 (20 min)                | <b>PIDA</b>                                    | 60 (48 h)                  | 4.9:1              | 60                    |
| 4               | <i>p</i> -TsOH                        | 60 (20 min)                | <b>PhIO</b>                                    | 60 (48 h)                  | 6:1                | 60                    |
| 5               | <i>p</i> -TsOH                        | 60 (20 min)                | <b>PIFA</b>                                    | 60 (48 h)                  | 5.2:1              | 63                    |
| 6               | <i>p</i> -TsOH                        | 60 (20 min)                | <b>DMP</b>                                     | 60 (48 h)                  | 3.8:1              | 19                    |
| 7               | <i>p</i> -TsOH                        | 60 (20 min)                | <b>IBX</b>                                     | 60 (48 h)                  | 4.8:1 <sup>d</sup> | 12                    |
| 8               | <i>p</i> -TsOH                        | 60 (20 min)                | <b>DDQ</b>                                     | 60 (48 h)                  |                    | 0                     |
| 9 <sup>d</sup>  | <i>p</i> -TsOH                        | 60 (20 min)                | <b>CAN</b>                                     | 60 (48 h)                  |                    | 0                     |
| 10              | <i>p</i> -TsOH                        | 60 (20 min)                | <b>Oxone</b>                                   | 60 (48 h)                  |                    | 4                     |
| 11              | <i>p</i> -TsOH                        | 60 (20 min)                | <b>K<sub>2</sub>S<sub>2</sub>O<sub>8</sub></b> | 60 (48 h)                  |                    | 6                     |
| 12              | <b>HBF<sub>4</sub>·H<sub>2</sub>O</b> | 60 (30 min)                | HTIB                                           | 60 (48 h)                  | 5.3:1              | 44                    |
| 13              | <b>TfOH</b>                           | 60 (20 min)                | HTIB                                           | 60 (30 h)                  | 5.0:1              | 45                    |
| 14              | <b>Cu(OTf)<sub>2</sub></b>            | 60 (20 min)                | HTIB                                           | 60 (48 h)                  |                    | 9                     |
| 15              | <b>AlCl<sub>3</sub></b>               | 60 (7 h)                   | HTIB                                           | 60 (48 h)                  |                    | 0                     |
| 16              | <b>TiCl<sub>4</sub></b>               | 60 (20 min)                | HTIB                                           | 60 (48 h)                  |                    | 0                     |
| 17              | <i>p</i> -TsOH                        | <b>50 (30 min)</b>         | HTIB                                           | <b>50 (48 h)</b>           | 6:1                | 56                    |
| 18              | <i>p</i> -TsOH                        | <b>70 (20 min)</b>         | HTIB                                           | <b>70 (48 h)</b>           | 5.1:1              | 59                    |
| 19              | <i>p</i> -TsOH                        | <b>80 (20 min)</b>         | HTIB                                           | <b>80 (48 h)</b>           | 4:1                | 57                    |
| 20 <sup>e</sup> | <i>p</i> -TsOH                        | 60 (2.5 h)                 | HTIB                                           | 60 (48 h)                  | 5.8:1              | 51                    |

<sup>a</sup>Otherwise specified, reactions were performed using **2a** (0.2 mmol), acid (3.0 eq.), and oxidant (2.0 eq.) in 1.0 mL CH<sub>3</sub>CN at the noted temperature in a 10 mL sealed tube. <sup>b</sup>Isolated yield. <sup>c</sup>acids (2.0 eq.). <sup>d</sup>diastereomeric ratio after isolated. <sup>e</sup>acid (0.2 eq.).

**Table S4** The screening of equivalent of CH<sub>3</sub>CN <sup>a</sup>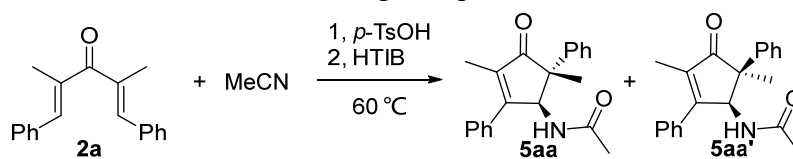

| Entry          | Acid           | T <sub>1</sub> / °C (time) | Oxidant | T <sub>2</sub> / °C (time) | Solvent | CH <sub>3</sub> CN | Yield <sup>b</sup> /% |
|----------------|----------------|----------------------------|---------|----------------------------|---------|--------------------|-----------------------|
| 1              | <i>p</i> -TsOH | 60 (20 min)                | HTIB    | 60 (48 h)                  | HFIP    | 10 eq              | trace                 |
| 2              | <i>p</i> -TsOH | 60 (20 min)                | HTIB    | 60 (48 h)                  | HFIP    | 20 eq              | 2                     |
| 3              | <i>p</i> -TsOH | 60 (20 min)                | HTIB    | 60 (48 h)                  | HFIP    | 30 eq              | 3                     |
| 4 <sup>c</sup> | <i>p</i> -TsOH | 60 (20 min)                | HTIB    | 60 (48 h)                  | HFIP    | 0.5 ml             | 10                    |

<sup>a</sup>Otherwise specified, the reactions were performed using **2a** (0.2 mmol), *p*-TsOH·H<sub>2</sub>O (3.0 equiv.) and HTIB (2.0 equiv.) in 1.0 mL HFIP at the noted temperature. <sup>b</sup>NMR yield. <sup>c</sup>CH<sub>3</sub>CN:HFIP = 0.5mL:0.5mL.

## 3.2 Construct 2-quaternary-3-amidoindanones from chalcone derivatives

### 3.2.1 General procedure B

Unless otherwise stated, the general procedure is as follows: to a 10 mL sealed tube containing a magnetic stir bar were added sequentially chalcone derivatives (0.2 mmol), TfOH (53  $\mu$ L, 0.6 mmol) and nitrile (1 mL) at room temperature, then the mixture was placed in a preheated oil bath at 60 °C and stirred for the indicated time. After the indicated time, the reaction mixture was cooled down to room temperature, HTIB (156.9 mg, 0.4 mmol) was added and the mixture was stirred at 60 °C for the indicated time. The reaction mixture was cooled to room temperature, diluted with DCM (15.0mL) and H<sub>2</sub>O (15.0 mL), and the aqueous layer was extracted with DCM. The combined organic phase was successively washed with water and brine, dried with Na<sub>2</sub>SO<sub>4</sub>, filtered, and concentrated in vacuum. The residues were purified by flash column chromatography on silica gel (DCM/CH<sub>3</sub>OH or petroleum ether/ethyl acetate) to afford the desired product.

### 3.2.2 The details for the optimization of reaction conditions

**Table S5** The details of the optimal reaction conditions<sup>a</sup>

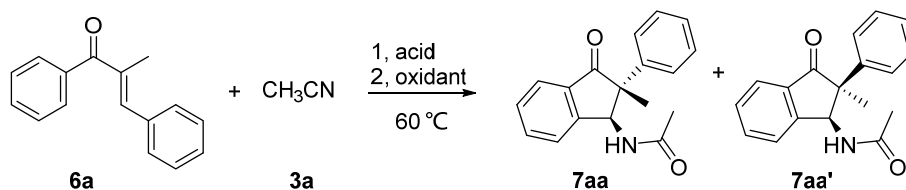

| Entry          | Acid                               | Oxidant | T <sub>1</sub> / °C<br>(time) | T <sub>2</sub> / °C(time) | dr     | Yield <sup>b</sup> /% |
|----------------|------------------------------------|---------|-------------------------------|---------------------------|--------|-----------------------|
| 1              | <i>p</i> -TsOH                     |         |                               |                           |        | NR                    |
| 2 <sup>c</sup> | HBF <sub>4</sub> ·H <sub>2</sub> O |         |                               |                           |        | NR                    |
| 3              | TiCl <sub>4</sub>                  |         |                               |                           |        | complex               |
| 4              | Cu(OTf) <sub>2</sub>               |         |                               |                           |        | NR                    |
| 5              | BF <sub>3</sub> ·Et <sub>2</sub> O | HTIB    | 60 (12 h)                     | 60 (24 h)                 | 11.0:1 | 51                    |
| 6              | TfOH                               | HTIB    | 60 (1.5 h)                    | 60 (8 h)                  | 10.9:1 | 70                    |
| 7              | TfOH                               | HTIB    | 60 (1.5 h)                    | 60 (4 h)                  | 11.8:1 | 64                    |
| 8              | TfOH                               | PhIO    | 60 (1.5 h)                    | 60 (8 h)                  | 12.8:1 | 40                    |
| 9              | TfOH                               | PhIO    | 60 (1.5 h)                    | 60 (3 h)                  | 11.5:1 | 50                    |
| 10             | TfOH                               | PhIO    | 60 (1.5 h)                    | 60 (1.25 h)               | 12.0:1 | 41                    |
| 11             | TfOH                               | PIDA    | 60 (1.5 h)                    | 60 (8 h)                  | 11.7:1 | 33                    |
| 12             | TfOH                               | PIDA    | 60 (1.5 h)                    | 60 (4 h)                  | 11.0:1 | 32                    |
| 13             | TfOH                               | DMP     | 60 (1.5 h)                    | 60 (3 h)                  |        | 44                    |
| 14             | TfOH                               | PIFA    | 60 (1.5 h)                    | 60                        |        | decomposition         |

<sup>a</sup>Otherwise specified, the reactions were performed using **6a** (0.2 mmol), acids (3.0 equiv.), and oxidant (2.0 equiv.) in 1.0 mL CH<sub>3</sub>CN at the noted temperature; <sup>b</sup>Isolated yield; <sup>c</sup>50 wt. % in H<sub>2</sub>O.

### 3.3 Some control experiments

#### 3.3.1 Quenching the reaction at different time

Following the general procedure A, quenching the reaction at different times after adding oxidant was performed, and the result was shown in Figure S1. The yields of **4**, **8** and **5aa** were determined by  $^1\text{H}$  NMR.

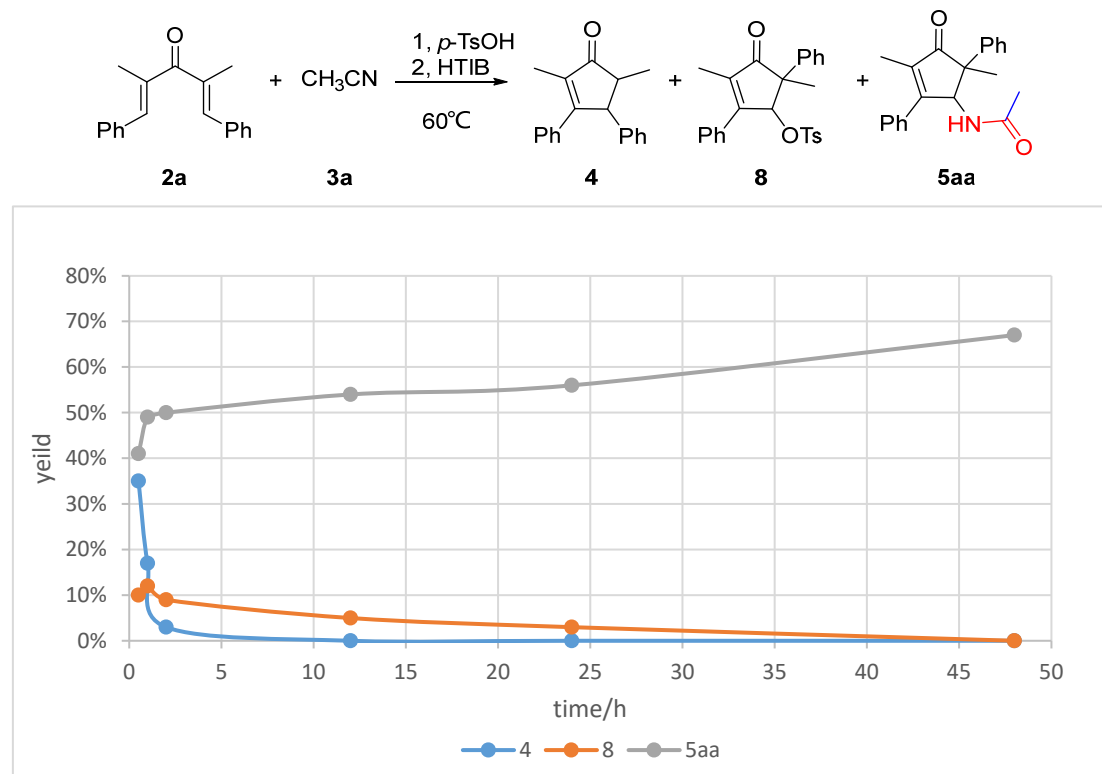

Figure S1 Quenching the reaction at different time

#### 3.3.2 The Nazarov reaction of substrate **2a**

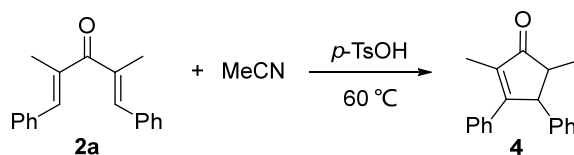

To a 10 mL sealed tube containing a magnetic stir bar were added divinyl ketone **2a** (52.5 mg, 0.2 mmol), *p*-TsOH·H<sub>2</sub>O (114.1 mg, 0.6 mmol) and nitrile (1 mL) at room temperature, then the mixture was placed in a preheated oil bath at 60 °C and stirred for the 20 min. The reaction mixture was cooled to room temperature, diluted with DCM (15.0 mL) and H<sub>2</sub>O (15.0 mL), and the aqueous layer was extracted with DCM. The combined organic phase was successively washed with water and brine, dried with Na<sub>2</sub>SO<sub>4</sub>, filtered, and concentrated in vacuum. The residues were purified by flash

column chromatography on silica gel (petroleum ether/ethyl acetate = 15:1) to afford the desired compound **4** (48.7 mg, 93%, 6.8:1).

### 3.3.3 The reaction of compound **4** under standard reaction conditions

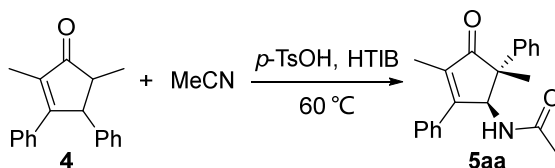

compound **4**, *p*-TsOH·H<sub>2</sub>O (3 eq.), HTIB (3 eq.) and nitrile (1 mL) were added to a 10 mL sealed tube fitted with a magnetic stirring rod at room temperature, then the mixture was placed in a preheated oil bath at 60 °C and stirred for the 48 h. The reaction mixture was cooled to room temperature, diluted with DCM (15.0 mL) and H<sub>2</sub>O (15.0 mL), and the aqueous layer was extracted with DCM. The combined organic phase was successively washed with water and brine, dried with Na<sub>2</sub>SO<sub>4</sub>, filtered, and concentrated in vacuum. The residues were purified by flash column chromatography on silica gel to afford the desired product **5aa**.

### 3.3.4 The reaction of byproduct **8** under standard reaction conditions

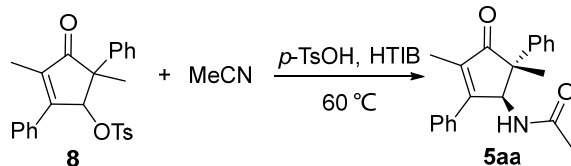

Byproduct **8** (18 mg, 0.04 mmol), *p*-TsOH·H<sub>2</sub>O (23.7 mg, 0.12 mmol), HTIB (32.6 mg, 0.08 mmol) and nitrile (0.4 mL) were added to a 10 mL sealed tube fitted with a magnetic stirring rod at room temperature, then the mixture was placed in a preheated oil bath at 60 °C and stirred for the 50 h. The reaction mixture was cooled to room temperature, diluted with DCM (15.0 mL) and H<sub>2</sub>O (15.0 mL), and the aqueous layer was extracted with DCM. The combined organic phase was successively washed with water and brine, dried with Na<sub>2</sub>SO<sub>4</sub>, filtered, and concentrated in vacuum. The residues were purified by flash column chromatography on silica gel to afford the desired product **5aa** (5.3 mg, 40%).

### 3.4 Explanation of the structure assignment for the two diastereoisomer

**Table S6** Comparison of H-4 NMR data of two diastereoisomer

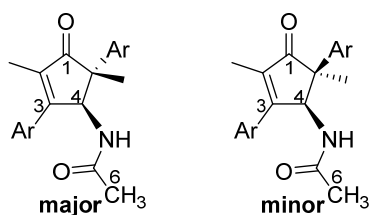

| Compounds       | Major H-4                        | Minor H-4                        | $\Delta\delta$ (ppm) |
|-----------------|----------------------------------|----------------------------------|----------------------|
| <b>5aa/5aa'</b> | 5.96 (d, $J = 9.6$ Hz)           | 5.72 (dd, $J = 10.4$ Hz, 2.0 Hz) | 0.24                 |
| <b>5ba/5ba'</b> | 5.89 (d, $J = 9.6$ Hz)           | 5.68 (dd, $J = 10.4$ Hz, 1.6 Hz) | 0.21                 |
| <b>5ea/5ea'</b> | 5.89 (dd, $J = 10.0$ Hz, 2.0 Hz) | 5.67 (dd, $J = 10.4$ Hz, 2.0 Hz) | 0.22                 |
| <b>5ga/5ga'</b> | 5.87 (dd, $J = 9.6$ Hz, 2.0 Hz)  | 5.67 (dd, $J = 10.0$ Hz, 1.6 Hz) | 0.20                 |
| <b>5ab/5ab'</b> | 5.97 (dd, $J = 9.6$ Hz, 1.6 Hz)  | 5.73 (dd, $J = 10.0$ Hz, 2.0 Hz) | 0.24                 |
| <b>5ai/5ai'</b> | 6.16 (dd, $J = 9.6$ Hz, 1.6 Hz)  | 5.95 (dd, $J = 10.2$ Hz, 2.4 Hz) | 0.21                 |

**Table S7** Comparison of H-6 NMR data of two diastereoisomer

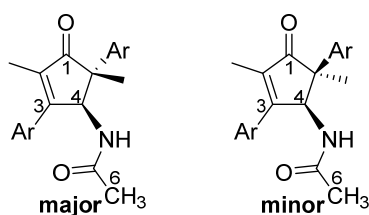

| Compounds       | Major H-6 | Minor H-6 | $\Delta\delta$ (ppm) |
|-----------------|-----------|-----------|----------------------|
| <b>5aa/5aa'</b> | 1.92 (s)  | 1.46 (s)  | 0.46                 |
| <b>5ba/5ba'</b> | 1.88 (s)  | 1.49 (s)  | 0.39                 |
| <b>5ca/5ca'</b> | 1.89 (s)  | 1.48 (s)  | 0.41                 |
| <b>5ea/5ea'</b> | 1.92 (s)  | 1.51 (s)  | 0.41                 |
| <b>5fa/5fa'</b> | 1.92 (s)  | 1.53 (s)  | 0.39                 |
| <b>5ga/5ga'</b> | 1.92 (s)  | 1.53 (s)  | 0.39                 |

**Table S8** Comparison of H-4 NMR data of two diastereoisomer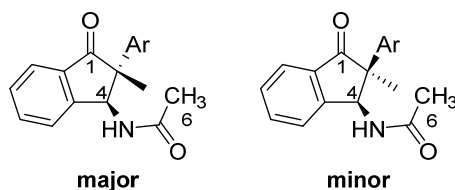

| Compounds       | Major H-4              | Minor H-4              | $\Delta\delta$ (ppm) |
|-----------------|------------------------|------------------------|----------------------|
| <b>7da/7da'</b> | 5.92 (d, $J = 9.2$ Hz) | 5.66 (d, $J = 9.6$ Hz) | 0.26                 |
| <b>7ea/7ea'</b> | 5.92 (d, $J = 9.2$ Hz) | 5.66 (d, $J = 9.6$ Hz) | 0.26                 |
| <b>7ga/7ga'</b> | 6.14 (d, $J = 9.2$ Hz) | 5.57 (d, $J = 9.2$ Hz) | 0.57                 |
| <b>7ia/7ia'</b> | 5.89 (d, $J = 9.2$ Hz) | 5.53 (d, $J = 9.2$ Hz) | 0.36                 |
| <b>7ja/7ja'</b> | 5.89 (d, $J = 9.2$ Hz) | 5.66 (d, $J = 9.2$ Hz) | 0.23                 |

**Table S9** Comparison of H-4 NMR data of two diastereoisomer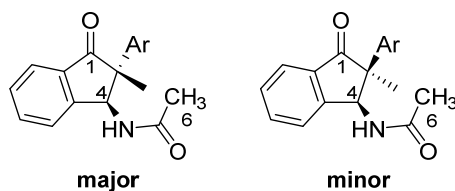

| Compounds       | Major H-6 | Minor H-6 | $\Delta\delta$ (ppm) |
|-----------------|-----------|-----------|----------------------|
| <b>7da/7da'</b> | 2.13 (s)  | 1.75 (s)  | 0.38                 |
| <b>7ea/7ea'</b> | 2.13 (s)  | 1.74 (s)  | 0.39                 |
| <b>7ga/7ga'</b> | 2.04 (s)  | 1.56 (s)  | 0.48                 |
| <b>7ia/7ia'</b> | 2.08 (s)  | 1.55 (s)  | 0.53                 |
| <b>7ja/7ja'</b> | 2.13 (s)  | 1.77 (s)  | 0.36                 |



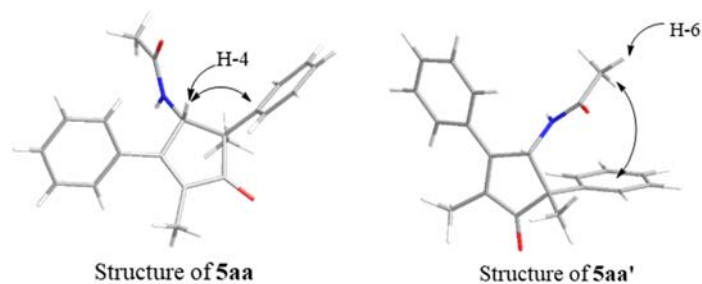

Figure S2 The Chem 3D chemical structure of major product **5aa** and minor product **5aa'**.

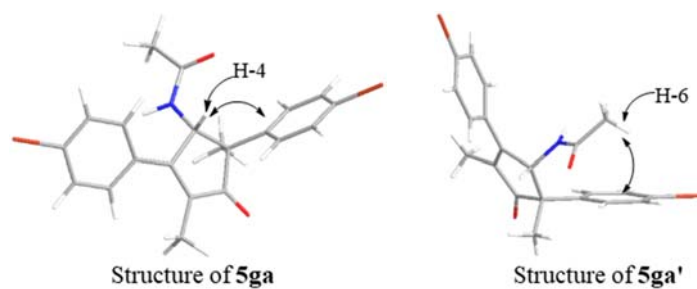

Figure S3 The Chem 3D chemical structure of major major product **5ga** and minor product **5ga'**.

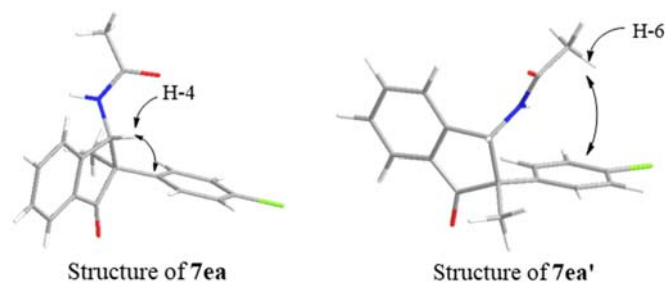

Figure S4 The Chem 3D chemical structure of major major product **7ea** and minor product **7ea'**.

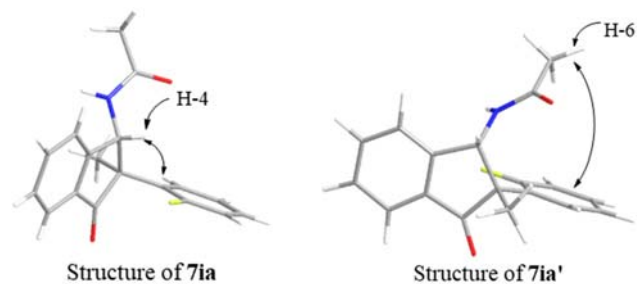

Figure S5 The Chem 3D chemical structure of major major product **7ia** and minor product **7ia'**.

### 3.5 Characterization data of products

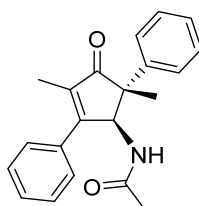

**5aa**

**5aa:** Following the general procedure A, reaction time: 20 min, 48h; 40.7 mg, 64% yield; dr: 5.2:1.

**5aa:** DCM/MeOH (300:1–150:1) as the eluent, white solid, m.p. = 195.8-197.7 °C. **<sup>1</sup>H NMR** (400 MHz, CDCl<sub>3</sub>): δ 7.52-7.42 (m, 7 H), 7.34 (dd, *J* = 8.0 Hz, 8.0 Hz, 2 H), 7.26-7.22 (m, 1 H), 5.96 (d, *J* = 9.6 Hz, 1 H), 5.38 (d, *J* = 9.6 Hz, 1 H), 2.08 (s, 3 H), 1.92 (s, 3 H), 1.45 (s, 3 H); **<sup>13</sup>C NMR** (100 MHz, CDCl<sub>3</sub>): δ 209.7, 170.1, 162.4, 143.8, 137.0, 133.4, 130.2, 128.9, 128.8, 128.6, 127.0, 126.5, 61.0, 54.7, 23.1, 20.9, 10.6; **HRMS** (ESI) *m/z* calculated for C<sub>21</sub>H<sub>21</sub>NO<sub>2</sub>Na [M+Na]<sup>+</sup> 342.1465, found 342.1464; **MS** (EI) *m/z* (%): 319 (100), 276 (15), 261 (28), 260 (71), 107 (6); **IR** (KBr plate): 3293, 2954, 2850, 1700, 1650, 1445, 1278, 1013, 733 cm<sup>-1</sup>.

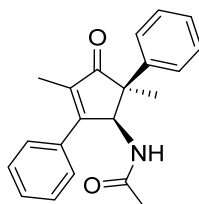

**5aa'**

**5aa':** DCM/MeOH (300:1–150:1) as the eluent, white solid, m.p. = 201.3-203.2 °C. **<sup>1</sup>H NMR** (400 MHz, CDCl<sub>3</sub>): δ 7.53-7.50 (m, 2 H), 7.48-7.40 (m, 3 H), 7.33-7.29 (m, 2 H), 7.25-7.22 (m, 1 H), 7.15-7.13 (m, 2 H), 5.72 (dd, *J* = 10.4 Hz, 2.0 Hz, 1 H), 4.67 (d, *J* = 10.0 Hz, 1 H), 2.13 (d, *J* = 2.0 Hz, 3 H), 1.78 (s, 3 H), 1.46 (s, 3 H); **<sup>13</sup>C NMR** (100 MHz, CDCl<sub>3</sub>): δ 209.7, 170.0, 163.3, 141.1, 138.2, 133.3, 130.1, 128.8, 128.7, 128.6, 127.5, 127.3, 60.6, 56.0, 23.4, 22.9, 10.6; **HRMS** (ESI) *m/z* calculated for C<sub>21</sub>H<sub>21</sub>NO<sub>2</sub>Na [M+Na]<sup>+</sup> 342.1465, found 342.1466; **MS** (EI) *m/z* (%): 319 (32), 262 (29), 261 (9), 107 (9), 57 (100); **IR** (KBr plate): 3292, 2956, 2851, 1736, 1649, 1443, 1262, 1016, 746 cm<sup>-1</sup>.

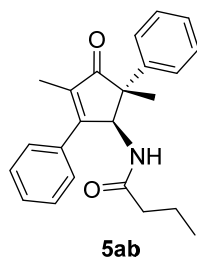

**5ab:** Following the general procedure A, reaction time: 30 min, 48 h; 32.1 mg, 46% yield; dr: 4.5:1.

**5ab:** Petroleum ether/ethyl acetate (6:1) as the eluent, white solid, m.p. = 179.0-180.6 °C. <sup>1</sup>H NMR (400 MHz, CDCl<sub>3</sub>): δ 7.51-7.48 (m, 2 H), 7.45-7.39 (m, 5 H), 7.35-7.31 (m, 2 H), 7.25-7.21 (m, 1 H), 5.97 (dd, *J* = 9.6 Hz, 1.6 Hz, 1 H), 5.47 (d, *J* = 9.6 Hz, 1 H), 2.15-1.99 (m, 5 H), 1.57-1.48 (m, 2 H), 1.44 (s, 3 H), 0.79 (t, *J* = 7.2 Hz, 3 H); <sup>13</sup>C NMR (100 MHz, CDCl<sub>3</sub>): δ 209.7, 173.0, 162.5, 143.8, 137.0, 133.4, 130.2, 128.9, 128.8, 128.6, 127.0, 126.6, 60.8, 54.6, 38.6, 21.1, 19.2, 13.7, 10.6; HRMS (ESI) *m/z* calculated for C<sub>23</sub>H<sub>25</sub> NO<sub>2</sub>Na [M+Na]<sup>+</sup> 370.1778, found 370.1763; MS (EI) *m/z* (%): 347 (75), 262 (100), 115 (40), 107 (6), 71 (62); IR (KBr plate): 3291, 2956, 2871, 1703, 1642, 1453, 1086, 751 cm<sup>-1</sup>.

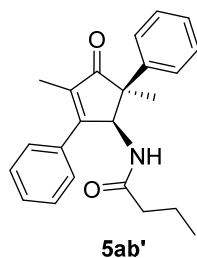

**5ab':** Petroleum ether/ethyl acetate (6:1) as the eluent, white solid, m.p. = 138.8-140.4 °C. <sup>1</sup>H NMR (400 MHz, CDCl<sub>3</sub>): δ 7.52-7.50 (m, 2 H), 7.47-7.39 (m, 3 H), 7.31-7.28 (m, 2 H), 7.24-7.21 (m, 1 H), 7.15-7.13 (m, 2 H), 5.73 (dd, *J* = 10.0 Hz, 2.0 Hz, 1 H), 4.67 (d, *J* = 10.4 Hz, 1 H), 2.12 (d, *J* = 2.0 Hz, 3 H), 1.78 (s, 3 H), 1.61 (td, *J* = 7.6 Hz, 2.0 Hz, 2 H), 1.23-1.14 (m, 2 H), 0.61 (t, *J* = 7.2 Hz, 3 H); <sup>13</sup>C NMR (150 MHz, CDCl<sub>3</sub>): δ 209.8, 172.7, 163.7, 141.1, 138.1, 133.3, 130.1, 128.8, 128.7, 127.5, 127.3, 60.3, 55.9, 38.3, 23.3, 18.7, 13.6, 10.6; HRMS (ESI) *m/z* calculated for C<sub>23</sub>H<sub>25</sub> NO<sub>2</sub>Na [M+Na]<sup>+</sup> 370.1778, found 370.1767; MS (EI) *m/z* (%): 347 (89), 262 (100), 115 (35), 107 (3), 71 (30); IR (KBr plate): 3285, 2958, 1702, 1642, 1460, 1341, 1076, 749 cm<sup>-1</sup>.

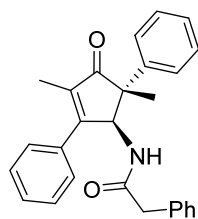

**5ac**

**5ac:** Following the general procedure A, reaction time: 30 min, 48 h; 37.4 mg, 47% yield; dr: 4.5:1.

**5ac:** Petroleum ether/ethyl acetate (8:1) as the eluent, white solid, m.p. = 159.0-160.3 °C. <sup>1</sup>H NMR (400 MHz, CDCl<sub>3</sub>): δ 7.43-7.36 (m, 7 H), 7.33-7.29 (m, 2 H), 7.24-7.14 (m, 4 H), 6.90-6.88 (m, 2 H), 5.89 (dd, *J* = 9.6 Hz, 2.0 Hz, 1 H), 5.42 (d, *J* = 9.6 Hz, 1 H), 3.48 (d, *J* = 15.6 Hz, 1 H), 3.42 (d, *J* = 15.6 Hz, 1 H), 1.98 (d, *J* = 1.6 Hz, 3 H), 1.27 (s, 3 H); <sup>13</sup>C NMR (100 MHz, CDCl<sub>3</sub>): δ 209.4, 170.9, 162.6, 143.6, 136.9, 134.4, 133.3, 130.0, 129.2, 129.1, 128.81, 128.76, 128.4, 127.4, 127.0, 126.5, 61.1, 54.5, 43.7, 20.9, 10.4; **HRMS** (ESI) *m/z* calculated for C<sub>27</sub>H<sub>25</sub>NO<sub>2</sub>Na [M+Na]<sup>+</sup> 418.1778, found 418.1764; **MS** (EI) *m/z* (%): 395 (91), 262 (74), 115 (31), 91 (100), 77 (11); **IR** (KBr plate): 3291, 2954, 2851, 1703, 1642, 1452, 1340, 1076, 764 cm<sup>-1</sup>.

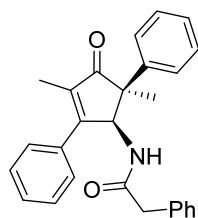

**5ac'**

**5ac':** Petroleum ether/ethyl acetate (8:1) as the eluent, white solid, m.p. = 163.6-165.6 °C. <sup>1</sup>H NMR (400 MHz, CDCl<sub>3</sub>): δ 7.43-7.36 (m, 5 H), 7.25-7.23 (m, 3 H), 7.11-7.07 (m, 1 H), 7.03-6.99 (m, 4 H), 6.45 (d, *J* = 7.2 Hz, 2 H), 5.64 (dd, *J* = 10.0 Hz, 2.0 Hz, 1 H), 4.59 (d, *J* = 10.0 Hz, 1 H), 3.13 (d, *J* = 16.4 Hz, 1 H), 3.04 (d, *J* = 16.4 Hz, 1 H), 2.04 (d, *J* = 2.0 Hz, 3 H), 1.75 (s, 3 H); <sup>13</sup>C NMR (150 MHz, CDCl<sub>3</sub>): δ 209.5, 170.5, 163.8, 140.9, 138.2, 133.8, 133.2, 129.9, 129.2, 128.8, 128.73, 128.72, 128.5, 127.21, 127.19, 127.1, 60.6, 55.7, 43.4, 23.1, 10.4; **HRMS** (ESI) *m/z* calculated for C<sub>27</sub>H<sub>25</sub>NO<sub>2</sub>Na [M+Na]<sup>+</sup> 418.1778, found 418.1761; **MS** (EI) *m/z* (%): 395 (2), 115 (14), 91 (100), 77 (4); **IR** (KBr plate): 3295, 2955, 2853, 1703, 1642, 1442, 1339, 1016, 764 cm<sup>-1</sup>.

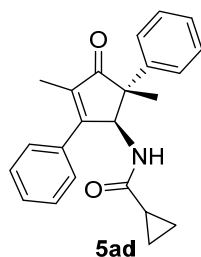

**5ad**: Following the general procedure A, reaction time: 30 min, 72 h; 32.6 mg, 47% yield; dr: 4.3:1.

**5ad**: Petroleum ether/ethyl acetate (8:1) as the eluent, white solid, m.p. = 194.6-196.5 °C.  $^1\text{H NMR}$  (400 MHz,  $\text{CDCl}_3$ ):  $\delta$  7.53-7.51 (m, 2 H), 7.46-7.44 (m, 5 H), 7.32 (dd,  $J = 7.6$  Hz, 7.6 Hz, 2 H), 7.24-7.20 (m, 1 H), 5.96 (d,  $J = 9.6$  Hz, 1 H), 5.50 (d,  $J = 8.8$  Hz, 1 H), 2.10 (s, 3 H), 1.47 (s, 3 H), 1.27-1.22 (m, 1 H), 1.00-0.88 (m, 2 H), 0.75-0.64 (m, 2 H);  $^{13}\text{C NMR}$  (100 MHz,  $\text{CDCl}_3$ ):  $\delta$  209.8, 173.8, 162.4, 143.9, 137.0, 133.4, 130.1, 128.83, 128.75, 128.7, 126.9, 126.5, 61.1, 54.9, 20.9, 14.7, 10.7, 7.6, 7.3; **HRMS** (ESI)  $m/z$  calculated for  $\text{C}_{23}\text{H}_{23}\text{NO}_2\text{Na}$   $[\text{M}+\text{Na}]^+$  368.1621, found 368.1606; **MS** (EI)  $m/z$  (%): 345 (100), 262 (91), 115 (45), 77 (18), 69 (78); **IR** (KBr plate): 3307, 295, 2851, 1701, 1639, 1446, 1340, 1076, 765  $\text{cm}^{-1}$ .

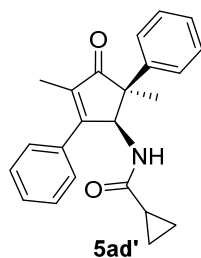

**5ad'**: Petroleum ether/ethyl acetate (8:1) as the eluent, white solid, m.p. = 196.5-198.3 °C.  $^1\text{H NMR}$  (400 MHz,  $\text{CDCl}_3$ ):  $\delta$  7.53-7.50 (m, 2 H), 7.48-7.40 (m, 3 H), 7.32-7.28 (m, 2 H), 7.25-7.21 (m, 1 H), 7.15-7.13 (m, 2 H), 5.72 (dd,  $J = 10.4$  Hz, 2.0 Hz, 1 H), 4.83 (d,  $J = 10.4$  Hz, 1 H), 2.13 (d,  $J = 2.4$  Hz, 3 H), 1.76 (s, 3 H), 0.76-0.68 (m, 2 H), 0.66-0.61 (m, 1 H), 0.49-0.41 (m, 2 H);  $^{13}\text{C NMR}$  (100 MHz,  $\text{CDCl}_3$ ):  $\delta$  209.9, 173.6, 163.6, 141.0, 138.1, 133.3, 130.1, 128.84, 128.77, 128.5, 127.6, 127.2, 60.6, 56.0, 23.3, 14.5, 10.6, 7.4, 6.8; **HRMS** (ESI)  $m/z$  calculated for  $\text{C}_{23}\text{H}_{23}\text{NO}_2\text{Na}$   $[\text{M}+\text{Na}]^+$  368.1621, found 368.1609; **MS** (EI)  $m/z$  (%): 345 (100), 262 (85), 115 (43), 77 (17), 69 (72); **IR** (KBr plate): 3311, 2956, 2870, 1701, 1640, 1444, 1339, 1014, 764  $\text{cm}^{-1}$ .

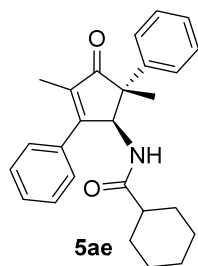

**5ae:** Following the general procedure A, reaction time: 30 min, 72 h; 34.5 mg, 45% yield; dr: 3.3:1.

**5ae:** Petroleum ether/ethyl acetate (10:1) as the eluent, white solid, m.p. = 168.5-170.1 °C. <sup>1</sup>H NMR (400 MHz, CDCl<sub>3</sub>): δ 7.51-7.48 (m, 2 H), 7.46-7.41 (m, 5 H), 7.34-7.30 (m, 2 H), 7.24-7.20 (m, 1 H), 5.94 (dd, *J* = 9.6 Hz, 1.6 Hz, 1 H), 5.42 (d, *J* = 9.6 Hz, 1 H), 2.08 (d, *J* = 1.6 Hz, 3 H), 2.04-1.95 (m, 1 H), 1.76-1.70 (m, 2 H), 1.65-1.52 (m, 3 H), 1.42 (s, 3 H), 1.37-1.23 (m, 2 H), 1.21-1.10 (m, 3 H); <sup>13</sup>C NMR (100 MHz, CDCl<sub>3</sub>): δ 209.7, 176.0, 162.5, 143.9, 136.9, 133.4, 130.1, 128.82, 128.78, 128.7, 127.0, 126.6, 60.6, 54.7, 45.5, 29.8, 29.5, 25.71, 25.66 25.6, 21.1, 10.6; HRMS (ESI) *m/z* calculated for C<sub>26</sub>H<sub>29</sub>NO<sub>2</sub>Na [M+Na]<sup>+</sup> 410.2091, found 410.2080; MS (EI) *m/z* (%): 387 (89), 276 (21), 262 (100), 115 (30), 77 (10); IR (KBr plate): 3293, 2926, 2853, 1701, 1642, 1447, 1339, 1076, 765 cm<sup>-1</sup>.

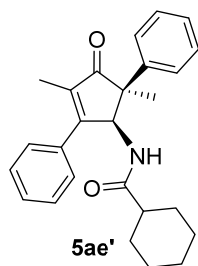

**5ae':** Petroleum ether/ethyl acetate (10:1) as the eluent, white solid, m.p. = 168.1-169.8 °C. <sup>1</sup>H NMR (400 MHz, CDCl<sub>3</sub>): δ 7.52-7.39 (m, 5 H), 7.33-7.21 (m, 3 H), 7.14-7.12 (m, 2 H), 5.70 (dd, *J* = 10.0 Hz, 2.0 Hz, 1 H), 4.73 (d, *J* = 10.0 Hz, 1 H), 2.13 (d, *J* = 2.0 Hz, 3 H), 1.77 (s, 3 H), 1.57-1.50 (m, 4 H), 1.26-1.14 (m, 2 H), 0.97-0.83 (m, 5 H); <sup>13</sup>C NMR (100 MHz, CDCl<sub>3</sub>): δ 210.0, 175.6, 163.7, 141.1, 137.9, 133.2, 130.1, 128.8, 128.7, 128.6, 127.5, 127.2, 59.9, 55.7, 45.1, 29.1, 29.0, 25.6, 25.5, 25.4, 23.3, 10.6; HRMS (ESI) *m/z* calculated for C<sub>26</sub>H<sub>29</sub>NO<sub>2</sub>Na [M+Na]<sup>+</sup> 410.2091, found 410.2090; MS (EI) *m/z* (%): 387 (7), 276 (7), 115 (62), 83 (100), 77 (30); IR (KBr plate): 3336, 2927, 2854, 1699, 1642, 1446, 1340, 1013, 754 cm<sup>-1</sup>.

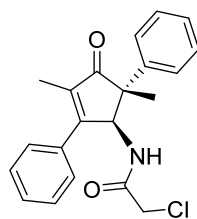

**5af**

**5af:** Following the general procedure A, reaction time: 30 min, 48 h; 34.0 mg, 48% yield; dr: 7.7:1.

**5af:** Petroleum ether/ethyl acetate (7:1) as the eluent, white solid, m.p. = 182.6-185.1 °C. <sup>1</sup>H NMR (400 MHz, CDCl<sub>3</sub>): δ 7.48-7.44 (m, 5 H), 7.41-7.39 (m, 2 H), 7.37-7.33 (m, 2 H), 7.27-7.24 (m, 1 H), 6.48 (d, *J* = 9.6 Hz, 1 H), 5.93 (d, *J* = 9.6 Hz, 1 H), 4.06 (d, *J* = 15.2 Hz, 1 H), 3.94 (d, *J* = 15.2 Hz, 1 H), 2.09 (s, 3 H), 1.48 (s, 3 H); <sup>13</sup>C NMR (100 MHz, CDCl<sub>3</sub>): δ 209.0, 166.0, 161.9, 143.4, 137.6, 133.1, 130.2, 128.94, 128.88, 128.4, 127.2, 126.4, 61.2, 54.6, 42.5, 20.8, 10.6; HRMS (ESI) *m/z* calculated for C<sub>21</sub>H<sub>20</sub>ClNO<sub>2</sub>Na [M+Na]<sup>+</sup> 376.1075, 378.1045, found 376.1058, 378.1021; MS (EI) *m/z* (%): 353 (30), 318 (100), 276 (10), 115 (33), 77 (19); IR (KBr plate): 3285, 2954, 2852, 1702, 1658, 1460, 1377, 1086, 750 cm<sup>-1</sup>.

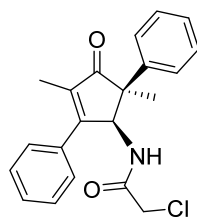

**5af'**

**5af':** Petroleum ether/ethyl acetate (7:1) as the eluent, white solid, m.p. = 134.6-136.2 °C. <sup>1</sup>H NMR (400 MHz, CDCl<sub>3</sub>): δ 7.52-7.50 (m, 2 H), 7.48-7.42 (m, 3 H), 7.34-7.30 (m, 2 H), 7.27-7.24 (m, 1 H), 7.16-7.13 (m, 2 H), 5.79 (d, *J* = 10.4 Hz, 1 H), 5.66 (dd, *J* = 10.4 Hz, 2.0 Hz, 1 H), 3.64 (d, *J* = 15.2 Hz, 1 H), 3.52 (d, *J* = 15.2 Hz, 1 H), 2.13 (d, *J* = 2.0 Hz, 3 H), 1.78 (s, 3 H); <sup>13</sup>C NMR (150 MHz, CDCl<sub>3</sub>): δ 209.3, 165.9, 162.8, 140.4, 138.7, 133.1, 130.2, 128.91, 128.89, 128.6, 127.6, 127.3, 60.8, 55.8, 42.2, 23.3, 10.6; HRMS (ESI) *m/z* calculated for C<sub>21</sub>H<sub>20</sub>ClNO<sub>2</sub>Na [M+Na]<sup>+</sup> 376.1075, 378.1045, found 376.1060, 378.1035; MS (EI) *m/z* (%): 353 (5), 318 (2), 115 (9), 105 (32), 71 (100); IR (KBr plate): 2955, 2850, 1657, 1452, 1076, 750 cm<sup>-1</sup>.

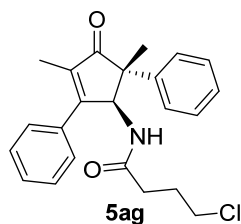

**5ag:** Following the general procedure A, reaction time: 30 min, 48 h; 34.3 mg, 45% yield; dr: 4.6:1.

**5ag:** Petroleum ether/ethyl acetate (6:1) as the eluent, white solid, m.p. = 156.8-158.4 °C. <sup>1</sup>H NMR (400 MHz, CDCl<sub>3</sub>): δ 7.50-7.47 (m, 2 H), 7.46-7.40 (m, 5 H), 7.35-7.32 (m, 2 H), 7.26-7.22 (m, 1 H), 5.96 (dd, *J* = 9.6 Hz, 1.6 Hz, 1 H), 5.75 (d, *J* = 9.6 Hz, 1 H), 3.47-3.41 (m, 1 H), 3.35-3.29 (m, 1 H), 2.36-2.29 (m, 1 H), 2.25-2.18 (m, 1 H), 2.06 (d, *J* = 2.0 Hz, 3 H), 2.02-1.95 (m, 2 H), 1.45 (s, 3 H); <sup>13</sup>C NMR (100 MHz, CDCl<sub>3</sub>): δ 209.5, 171.7, 162.5, 143.7, 137.1, 133.3, 130.2, 128.93, 128.85, 128.6, 127.1, 126.5, 61.0, 54.6, 44.2, 33.2, 28.0, 21.0, 10.6; HRMS (ESI) *m/z* calculated for C<sub>23</sub>H<sub>24</sub>ClNO<sub>2</sub>Na [M+Na]<sup>+</sup> 404.1388, 406.1358, found 404.1370, 406.1340; MS (EI) *m/z* (%): 381 (69), 262 (100), 115 (40), 105 (27), 77 (26); IR (KBr plate): 3291, 2956, 2853, 1703, 1642, 1445, 1340, 1051, 765 cm<sup>-1</sup>.

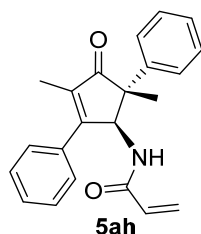

**5ah:** Following the general procedure A, reaction time: 30 min, 48 h; 36.3 mg, 55% yield; dr: 5.0:1.

**5ah:** Petroleum ether/ethyl acetate (5:1) as the eluent, white solid, m.p. = 196.4-198.4 °C. <sup>1</sup>H NMR (400 MHz, CDCl<sub>3</sub>): δ 7.51-7.49 (m, 2 H), 7.44-7.40 (m, 5 H), 7.35-7.31 (m, 2 H), 7.25-7.22 (m, 1 H), 6.24 (d, *J* = 16.8 Hz, 1 H), 6.03-5.94 (m, 2 H), 5.69 (d, *J* = 9.6 Hz, 1 H), 5.60 (d, *J* = 10.4 Hz, 1 H), 2.08 (d, *J* = 1.6 Hz, 3 H), 1.44 (s, 3 H); <sup>13</sup>C NMR (100 MHz, CDCl<sub>3</sub>): δ 209.6, 165.6, 162.1, 143.8, 137.2, 133.2, 130.2, 130.1, 128.9, 128.8, 128.6, 127.7, 127.1, 126.5, 61.1, 54.9, 20.9, 10.7; HRMS (ESI) *m/z* calculated for C<sub>22</sub>H<sub>21</sub>NO<sub>2</sub>Na [M+Na]<sup>+</sup> 354.1465, found 354.1450; MS (EI) *m/z* (%): 331 (20), 276 (14), 260 (10), 115 (100), 77 (50); IR (KBr plate): 3275, 2954, 2854, 1702, 1657, 1445, 1340, 1075, 765 cm<sup>-1</sup>.



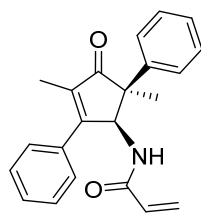

**5ah'**

**5ah'**: Petroleum ether/ethyl acetate (5:1) as the eluent, white solid, m.p. = 174.4-176.8 °C. <sup>1</sup>H NMR (400 MHz, CDCl<sub>3</sub>): δ 7.53-7.50 (m, 2 H), 7.46-7.38 (m, 3 H), 7.30-7.26 (m, 2 H), 7.24-7.20 (m, 1 H), 7.15-7.13 (m, 2 H), 5.83-5.78 (m, 2 H), 5.50 (dd, *J* = 17.2 Hz, 10.4 Hz, 1 H), 5.37 (dd, *J* = 10.4 Hz, 1.2 Hz, 1 H), 4.84 (d, *J* = 10.4 Hz, 1 H), 2.14 (d, *J* = 2.0 Hz, 3 H), 1.79 (s, 3 H); <sup>13</sup>C NMR (100 MHz, CDCl<sub>3</sub>): δ 209.6, 165.6, 163.3, 140.9, 138.3, 133.2, 130.2, 130.1, 128.8, 128.74, 128.71, 127.40, 127.36, 126.7, 60.3, 56.1, 23.2, 10.6; HRMS (ESI) *m/z* calculated for C<sub>22</sub>H<sub>21</sub>NO<sub>2</sub>Na [M+Na]<sup>+</sup> 354.1465, found 354.1451; MS (EI) *m/z* (%): 331 (100), 276 (25), 260 (63), 117 (16), 77 (22); IR (KBr plate): 3311, 2956, 2854, 1702, 1657, 1443, 1339, 1014, 749 cm<sup>-1</sup>.

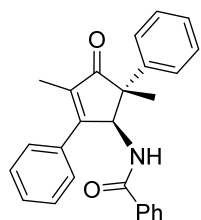

**5ai**

**5ai**: Following the general procedure A, reaction time: 30 min, 48 h; 38.2 mg, 50% yield; dr: 4.3:1.

**5ai**: Petroleum ether/ethyl acetate (8:1) as the eluent, white solid, m.p. = 186.6-187.8 °C. <sup>1</sup>H NMR (400 MHz, CDCl<sub>3</sub>): δ 7.59-7.55 (m, 4 H), 7.50-7.48 (m, 2 H), 7.46-7.34 (m, 8 H), 7.27-7.23 (m, 1 H), 6.16 (dd, *J* = 9.6 Hz, 1.6 Hz, 1 H), 6.09 (d, *J* = 9.6 Hz, 1 H), 2.12 (d, *J* = 1.6 Hz, 3 H), 1.52 (s, 3 H); <sup>13</sup>C NMR (100 MHz, CDCl<sub>3</sub>): δ 209.6, 167.7, 162.2, 143.9, 137.4, 134.1, 133.3, 131.9, 130.3, 129.0, 128.9, 128.8, 128.6, 127.1, 127.0, 126.6, 61.6, 55.1, 21.0, 10.8; HRMS (ESI) *m/z* calculated for C<sub>26</sub>H<sub>23</sub>NO<sub>2</sub>Na [M+Na]<sup>+</sup> 404.1621, found 404.1608; MS (EI) *m/z* (%): 381 (31), 276 (9), 260 (23), 115 (10), 105 (100), 77 (40); IR (KBr plate): 3310, 2955, 1700, 1639, 1445, 1341, 1076, 696 cm<sup>-1</sup>.

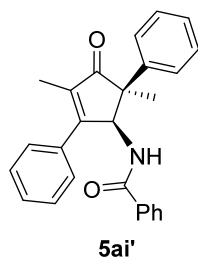

**5ai'**: Petroleum ether/ethyl acetate (8:1) as the eluent, white solid, m.p. = 214.8-216.4 °C. <sup>1</sup>H NMR (600 MHz, CDCl<sub>3</sub>): δ 7.59-7.58 (m, 2 H), 7.44-7.42 (m, 2 H), 7.39-7.37 (m, 1 H), 7.33-7.28 (m, 3 H), 7.24-7.20 (m, 3 H), 7.18-7.16 (m, 2 H), 6.95-6.94 (m, 2 H), 5.95 (dd, *J* = 10.2 Hz, 2.4 Hz, 1 H), 5.32 (d, *J* = 10.2 Hz, 1 H), 2.16 (d, *J* = 2.4 Hz, 3 H), 1.85 (s, 3 H); <sup>13</sup>C NMR (100 MHz, CDCl<sub>3</sub>): δ 209.6, 167.6, 163.6, 141.2, 138.4, 134.3, 133.2, 131.5, 130.2, 128.94, 128.85, 128.8, 128.4, 127.44, 127.39, 126.6, 60.7, 56.1, 23.3, 10.7; **HRMS** (ESI) *m/z* calculated for C<sub>26</sub>H<sub>24</sub>NO<sub>2</sub> [M+H]<sup>+</sup> 382.1802, found 382.1793; **MS** (EI) *m/z* (%): 381 (1), 260 (1), 115 (16), 105 (100), 77 (79); **IR** (KBr plate): 3322, 2955, 1702, 1640, 1534, 1340, 1016, 748 cm<sup>-1</sup>.

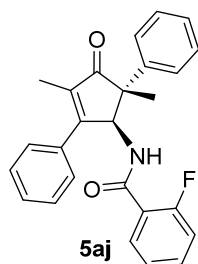

**5aj**: Following the general procedure A, reaction time: 30 min, 48 h; 43.4 mg, 54% yield; dr: 4.0:1.

**5aj**: Petroleum ether/ethyl acetate (10:1) as the eluent, white solid, m.p. = 167.3-169.0 °C. <sup>1</sup>H NMR (400 MHz, CDCl<sub>3</sub>): δ 8.00 (ddd, *J* = 8.0 Hz, 8.0 Hz, 2 Hz, 1 H), 7.57-7.54 (m, 2 H), 7.51-7.48 (m, 2 H), 7.44-7.33 (m, 6 H), 7.28-7.19 (m, 2 H), 7.01 (ddd, *J* = 12.0 Hz, 8.4 Hz, 0.8 Hz, 1 H), 6.65 (dd, *J* = 12.4 Hz, 9.6 Hz, 1 H), 6.21-6.18 (m, 1 H), 2.10 (d, *J* = 1.6 Hz, 3 H), 1.53 (s, 3 H); <sup>13</sup>C NMR (100 MHz, CDCl<sub>3</sub>): δ 209.4, 163.5 (d, *J* = 3 Hz), 162.3, 160.5 (d, *J* = 245 Hz), 143.8, 137.4, 133.7 (d, *J* = 9 Hz), 133.4, 132.1 (d, *J* = 1 Hz), 130.1, 128.9, 128.8, 128.5, 127.0, 126.5, 125.0 (d, *J* = 3 Hz), 120.6 (d, *J* = 12 Hz), 116.1 (d, *J* = 24 Hz), 61.6, 55.0, 20.9, 10.6; <sup>19</sup>F NMR (376 MHz, CDCl<sub>3</sub>): δ -113.65; **HRMS** (ESI) *m/z* calculated for C<sub>26</sub>H<sub>22</sub>FNO<sub>2</sub>Na [M+Na]<sup>+</sup> 422.1527 found 422.1508; **MS** (EI) *m/z* (%): 399 (1), 123 (100), 115 (22), 95 (34), 77 (14); **IR** (KBr plate): 3326, 2955, 1702, 1640, 1450, 1341, 1076, 757 cm<sup>-1</sup>.

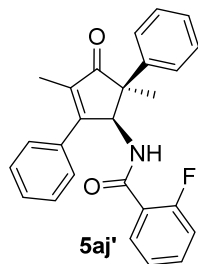

**5aj'**: Petroleum ether/ethyl acetate (10:1) as the eluent, white solid, m.p. = 168.2-170.1 °C. <sup>1</sup>H NMR (400 MHz, CDCl<sub>3</sub>): δ 7.71 (ddd, *J* = 7.6 Hz, 7.6 Hz, 1.6 Hz, 1 H), 7.58-7.56 (m, 2 H), 7.45-7.38 (m, 3 H), 7.31-7.28 (m, 1 H), 7.24-7.22 (m, 2 H), 7.19-7.14 (m, 3 H), 7.11-7.08 (m, 1 H), 6.80 (dd, *J* = 12.0 Hz, 8.8 Hz, 1 H), 5.97-5.93 (m, 2 H), 2.14 (s, 3 H), 1.85 (s, 3 H); <sup>13</sup>C NMR (100 MHz, CDCl<sub>3</sub>): δ 209.6, 163.7, 163.4 (d, *J* = 3 Hz), 160.3 (d, *J* = 247 Hz), 140.8, 138.5, 133.3 (d, *J* = 1 Hz), 133.2, 131.6 (d, *J* = 1 Hz), 130.1, 128.8, 128.69, 128.68, 127.3, 126.5, 124.6 (d, *J* = 4 Hz), 120.5 (d, *J* = 11 Hz), 116.0 (d, *J* = 24 Hz), 61.2, 56.1, 23.2, 10.6; <sup>19</sup>F NMR (376 MHz, CDCl<sub>3</sub>): δ -114.14; HRMS (ESI) *m/z* calculated for C<sub>26</sub>H<sub>23</sub>FNO<sub>2</sub> [M+H]<sup>+</sup> 400.1707 found 400.1698; MS (EI) *m/z* (%): 399 (1), 123 (100), 115 (23), 95 (38), 77 (9); IR (KBr plate): 2955, 2851, 1702, 1641, 1452, 1340, 1015, 753 cm<sup>-1</sup>.

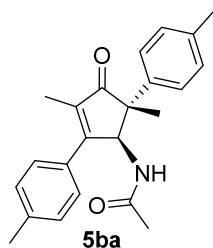

**5ba**: Following the general procedure A, reaction time: 20 min, 96 h; 29.1 mg, 42% yield; dr: 6.1:1.

**5ba**: DCM/MeOH (300:1–150:1) as the eluent, white solid, m.p. = 181.6-182.4 °C. <sup>1</sup>H NMR (400 MHz, CDCl<sub>3</sub>): δ 7.39 (d, *J* = 8.0 Hz, 2 H), 7.27 (d, *J* = 8.0 Hz, 2 H), 7.23 (d, *J* = 8.0 Hz, 2 H), 7.11 (d, *J* = 8.0 Hz, 2 H), 5.89 (d, *J* = 9.6 Hz, 1 H), 5.73 (d, *J* = 9.6 Hz, 1 H), 2.38 (s, 3 H), 2.30 (s, 3 H), 2.04 (s, 3 H), 1.88 (s, 3 H), 1.40 (s, 3 H); <sup>13</sup>C NMR (100 MHz, CDCl<sub>3</sub>): δ 209.8, 170.1, 162.3, 140.9, 140.5, 136.5, 136.2, 130.5, 129.6, 129.4, 128.6, 126.3, 60.9, 54.3, 23.1, 21.5, 21.0, 20.8, 10.7; HRMS (ESI) *m/z* calculated for C<sub>23</sub>H<sub>25</sub>NO<sub>2</sub>Na [M+Na]<sup>+</sup> 370.1778, found 370.1764; MS (EI) *m/z* (%): 347 (43), 289 (15), 107 (9), 91 (22), 57 (100); IR (KBr plate): 3292, 2924, 1701, 1655, 1460, 1121, 1014, 824 cm<sup>-1</sup>.

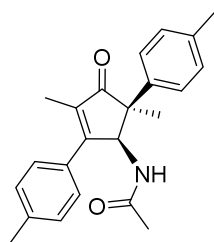

**5ba'**

**5ba'**: DCM/MeOH (300:1–150:1) as the eluent, white solid, m.p. = 191.9-193.8 °C. **<sup>1</sup>H NMR** (400 MHz, CDCl<sub>3</sub>): δ 7.41 (d, *J* = 8.0 Hz, 2 H), 7.25 (d, *J* = 9.2 Hz, 2 H), 7.10 (d, *J* = 8.0 Hz, 2 H), 7.01 (d, *J* = 8.0 Hz, 2 H), 5.68 (dd, *J* = 10.4 Hz, 1.6 Hz, 1 H), 4.67 (d, *J* = 10.4 Hz, 1 H), 2.39 (s, 3 H), 2.30 (s, 3 H), 2.11 (d, *J* = 1.6 Hz, 3 H), 1.73 (s, 3 H), 1.49 (s, 3 H); **<sup>13</sup>C NMR** (100 MHz, CDCl<sub>3</sub>): δ 209.8, 170.0, 163.4, 140.5, 138.1, 137.4, 136.9, 130.5, 129.5, 129.3, 128.8, 127.3, 60.4, 55.7, 23.4, 23.0, 21.6, 21.1, 10.7; **HRMS** (ESI) *m/z* calculated for C<sub>23</sub>H<sub>25</sub>NO<sub>2</sub>Na [M+Na]<sup>+</sup> 370.1778, found 370.1764; **MS** (EI) *m/z* (%): 347 (29), 289 (9), 107 (12), 91 (26), 57 (100); **IR** (KBr plate) 3321, 2923, 1701, 1649, 1459, 1376, 1075, 823 cm<sup>-1</sup>.

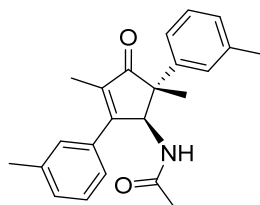

**5ca**

**5ca**: Following the general procedure A, reaction time: 20 min, 96 h; 27.7 mg, 40% yield; dr: 4.2:1.

**5ca**: DCM/MeOH (300:1–150:1) as the eluent, white solid, m.p. = 137.6-139.3 °C. **<sup>1</sup>H NMR** (400 MHz, CDCl<sub>3</sub>): δ 7.34-7.28 (m, 3 H), 7.24-7.18 (m, 4 H), 7.05-7.03 (m, 1 H), 5.89 (dd, *J* = 9.6 Hz, 1.6 Hz, 1 H), 5.55 (d, *J* = 9.6 Hz, 1 H), 2.38 (s, 3 H), 2.33 (s, 3 H), 2.06 (d, *J* = 1.6 Hz, 3 H), 1.89 (s, 3 H), 1.42 (s, 3 H); **<sup>13</sup>C NMR** (100 MHz, CDCl<sub>3</sub>): δ 209.9, 170.1, 162.7, 143.8, 138.6, 138.3, 136.9, 133.4, 130.9, 129.1, 128.7, 128.6, 127.8, 127.1, 125.7, 123.5, 61.3, 54.6, 23.1, 21.8, 21.6, 20.6, 10.7; **HRMS** (ESI) *m/z* calculated for C<sub>23</sub>H<sub>25</sub>NO<sub>2</sub>Na [M+Na]<sup>+</sup> 370.1778, found 370.1766; **MS** (EI) *m/z* (%): 347 (50), 289 (16), 107 (7), 91 (25), 57 (100); **IR** (KBr plate): 3276, 2954, 2853, 1702, 1656, 1460, 1339, 1007, 789 cm<sup>-1</sup>.

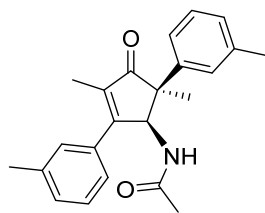

**5ca'**

**5ca'**: DCM/MeOH (300:1–150:1) as the eluent, white solid, m.p. = 134.9-136.7 °C. **<sup>1</sup>H NMR** (400 MHz, CDCl<sub>3</sub>): δ 7.36-7.29 (m, 3 H), 7.23-7.16 (m, 2 H), 7.04 (d, *J* = 7.2 Hz, 1 H), 6.93-6.91 (m, 2 H), 5.68 (dd, *J* = 10.4 Hz, 2.0 Hz, 1 H), 4.66 (d, *J* = 10.4 Hz, 1 H), 2.40 (s, 3 H), 2.31 (s, 3 H), 2.11 (d, *J* = 2.0 Hz, 3 H), 1.75 (s, 3 H), 1.48 (s, 3 H); **<sup>13</sup>C NMR** (100 MHz, CDCl<sub>3</sub>): δ 209.8, 170.0, 163.7, 141.1, 138.5, 138.2, 138.1, 133.4, 130.8, 129.3, 128.7, 128.5, 128.1, 128.0, 125.8, 124.5, 60.6, 55.9, 23.4, 22.9, 21.8, 21.6, 10.6; **HRMS** (ESI) *m/z* calculated for C<sub>23</sub>H<sub>25</sub>NO<sub>2</sub>Na [M+Na]<sup>+</sup> 370.1778, found 370.1762; **MS** (EI) *m/z* (%): 347 (19), 289 (7), 107 (4), 91 (12), 57 (100); **IR** (KBr plate): 3547, 2955, 1656, 1460, 1378, 1076 cm<sup>-1</sup>.

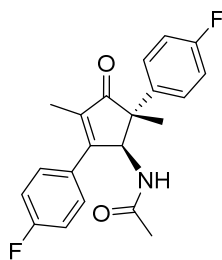

**5ea**

**5ea**: Following the general procedure A, reaction time: 20 min, 48h; 41.6 mg, 59% yield; dr: 4.7:1.

**5ea**: DCM/MeOH (300:1–150:1) as the eluent, white solid, m.p. = 176.6-178.5 °C. **<sup>1</sup>H NMR** (400 MHz, CDCl<sub>3</sub>): δ 7.51-7.48 (m, 2 H), 7.41-7.38 (m, 2 H), 7.17-7.12 (m, 2 H), 7.03-6.99 (m, 2 H), 5.89 (dd, *J* = 10.0 Hz, 2.0 Hz, 1 H), 5.57 (d, *J* = 10.0 Hz, 1 H), 2.05 (d, *J* = 1.6 Hz, 3 H), 1.92 (s, 3 H), 1.41 (s, 3 H); **<sup>13</sup>C NMR** (100 MHz, CDCl<sub>3</sub>): δ 209.1, 170.2, 163.6 (d, *J* = 250 Hz), 161.8 (d, *J* = 244 Hz), 161.2, 139.3 (d, *J* = 3 Hz), 136.7, 130.7 (d, *J* = 8 Hz), 129.2 (d, *J* = 4 Hz), 128.3 (d, *J* = 8 Hz), 116.2 (d, *J* = 22 Hz), 115.6 (d, *J* = 21 Hz), 60.8, 54.1, 23.2, 21.5, 10.6; **<sup>19</sup>F NMR** (376 MHz, CDCl<sub>3</sub>): δ -109.04, -115.91; **HRMS** (ESI) *m/z* calculated for C<sub>21</sub>H<sub>19</sub>F<sub>2</sub>NO<sub>2</sub>Na [M+Na]<sup>+</sup> 378.1276, found 378.1263; **MS** (EI) *m/z* (%): 355 (59), 298 (100), 268 (60), 259 (18), 107 (7); **IR** (KBr plate): 3275, 2955, 2851, 1703, 1656, 1461, 1234, 1014, 841 cm<sup>-1</sup>.

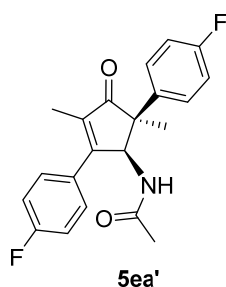

**5ea'**: DCM/MeOH (300:1–150:1) as the eluent, white solid, m.p. = 219.9-221.7 °C. **<sup>1</sup>H NMR** (400 MHz, CDCl<sub>3</sub>): δ 7.54-7.50 (m, 2 H), 7.17-7.10 (m, 4 H), 7.02-6.98 (m, 2 H), 5.67 (dd, *J* = 10.4 Hz, 2.0 Hz, 1 H), 4.68 (d, *J* = 10.0 Hz, 1 H), 2.11 (d, *J* = 1.6 Hz, 3 H), 1.74 (s, 3 H), 1.51 (s, 3 H); **<sup>13</sup>C NMR** (100 MHz, CDCl<sub>3</sub>): δ 209.4, 170.0, 163.6 (d, *J* = 250 Hz), 161.86 (d, *J* = 245 Hz), 161.90, 137.7, 136.7 (d, *J* = 3 Hz), 130.8 (d, *J* = 8 Hz), 129.3 (d, *J* = 7 Hz), 129.2 (d, *J* = 3 Hz), 116.1 (d, *J* = 21 Hz), 115.4 (d, *J* = 21 Hz), 60.5, 55.3, 24.2, 22.9, 10.7; **<sup>19</sup>F NMR** (376 MHz, CDCl<sub>3</sub>): δ -109.11, -114.92; **HRMS** (ESI) *m/z* calculated for C<sub>21</sub>H<sub>19</sub> F<sub>2</sub>NO<sub>2</sub>Na [M+Na]<sup>+</sup> 378.1276, found 378.1263; **MS** (EI) *m/z* (%): 355 (61), 298 (100), 268 (60), 259 (20), 107 (12); **IR** (KBr plate): 2955, 2851, 1701, 1656, 1460, 1234, 1015, 839 cm<sup>-1</sup>.

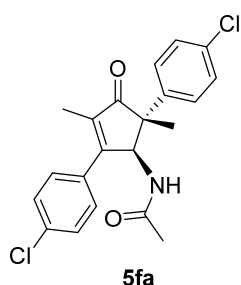

**5fa**: Following the general procedure A, reaction time: 20 min, 48h; 38.1 mg, 49% yield; dr: 4.7:1.

**5fa**: DCM/MeOH (300:1–150:1) as the eluent, white solid, m.p. = 167.8-169.6 °C. **<sup>1</sup>H NMR** (400 MHz, CDCl<sub>3</sub>): δ 7.42 (brs, 4 H), 7.37-7.35 (m, 2 H), 7.30-7.27 (m, 2 H), 5.88 (d, *J* = 10.0 Hz, 1 H), 5.57 (d, *J* = 9.6 Hz, 1 H), 2.04 (s, 3 H), 1.92 (s, 3 H), 1.41 (s, 3 H); **<sup>13</sup>C NMR** (100 MHz, CDCl<sub>3</sub>): δ 208.8, 170.2, 161.1, 142.0, 137.2, 136.4, 133.0, 131.5, 129.9, 129.3, 128.9, 128.1, 60.5, 54.3, 23.2, 21.3, 10.6; **HRMS** (ESI) *m/z* calculated for C<sub>21</sub>H<sub>19</sub> Cl<sub>2</sub>NO<sub>2</sub>Na [M+Na]<sup>+</sup> 410.0685, found 410.0665; **MS** (EI) *m/z* (%): 387 (54), 330 (100), 115 (59), 111 (15), 107 (8); **IR** (KBr plate): 3276, 2925, 1703, 1651, 1456, 1338, 1011, 736 cm<sup>-1</sup>.

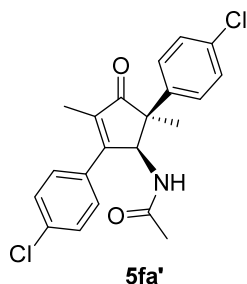

**5fa'**: DCM/MeOH (300:1–150:1) as the eluent, white solid, m.p. = 226.2–228.1 °C. **<sup>1</sup>H NMR** (400 MHz, CDCl<sub>3</sub>): δ 7.44 (brs, 4 H), 7.30–7.27 (m, 2 H), 7.09–7.07 (m, 2 H), 5.68 (dd, *J* = 10.4 Hz, 2.0 Hz, 1 H), 4.66 (d, *J* = 10.4 Hz, 1 H), 2.10 (d, *J* = 1.6 Hz, 3 H), 1.73 (s, 3 H), 1.53 (s, 3 H); **<sup>13</sup>C NMR** (100 MHz, CDCl<sub>3</sub>): δ 209.0, 170.0, 161.8, 139.3, 138.3, 136.4, 133.3, 131.5, 130.0, 129.2, 129.0, 128.7, 60.3, 55.5, 24.0, 22.9, 10.6; **HRMS** (ESI) *m/z* calculated for C<sub>21</sub>H<sub>19</sub> Cl<sub>2</sub>NO<sub>2</sub>Na [M+Na]<sup>+</sup> 410.0685, found 410.0669; **MS** (EI) *m/z* (%): 387 (65), 330 (100), 115 (56), 111 (10), 107 (8); **IR** (KBr plate): 3350, 2955, 2851, 1695, 1462, 1377, 1094 cm<sup>-1</sup>.

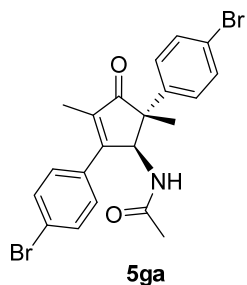

**5ga**: Following the general procedure A, reaction time: 20 min, 48h; 43.5 mg, 46% yield; dr: 4.4:1.

**5ga**: DCM/MeOH (300:1–150:1) as the eluent, white solid, m.p. = 165.4–167.2 °C. **<sup>1</sup>H NMR** (400 MHz, CDCl<sub>3</sub>): δ 7.58 (d, *J* = 8.4 Hz, 2 H), 7.45 (d, *J* = 8.4 Hz, 2 H), 7.34 (d, *J* = 8.4 Hz, 2 H), 7.30 (d, *J* = 8.4 Hz, 2 H), 5.87 (dd, *J* = 9.6 Hz, 2.0 Hz, 1 H), 5.54 (d, *J* = 10.0 Hz, 1 H), 2.03 (d, *J* = 1.6 Hz, 3 H), 1.92 (s, 3 H), 1.40 (s, 3 H); **<sup>13</sup>C NMR** (100 MHz, CDCl<sub>3</sub>): δ 208.7, 170.2, 161.1, 142.5, 137.3, 132.3, 132.0, 131.9, 130.1, 128.4, 124.8, 121.2, 60.4, 54.3, 23.2, 21.3, 10.6; **HRMS** (ESI) *m/z* calculated for C<sub>21</sub>H<sub>19</sub> Br<sub>2</sub>NO<sub>2</sub>Na [M+Na]<sup>+</sup> 497.9675, found 497.9642; **MS** (EI) *m/z* (%): 477 (82), 475 (42), 420 (100), 154 (8), 115 (94); **IR** (KBr plate): 3449, 2955, 1701, 1655, 1490, 1076 cm<sup>-1</sup>.

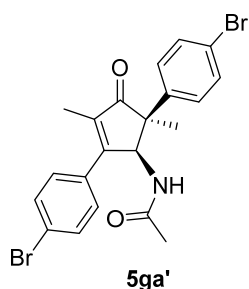

**5ga'**: DCM/MeOH (300:1–150:1) as the eluent, white solid, m.p. = 233.2–234.7 °C. **<sup>1</sup>H NMR** (400 MHz, CDCl<sub>3</sub>): δ 7.59 (d, *J* = 8.4 Hz, 2 H), 7.43 (d, *J* = 8.8 Hz, 2 H), 7.37 (d, *J* = 8.4 Hz, 2 H), 7.01 (d, *J* = 8.4 Hz, 2 H), 5.67 (dd, *J* = 10.0 Hz, 1.6 Hz, 1 H), 4.70 (d, *J* = 10.4 Hz, 1 H), 2.09 (d, *J* = 1.2 Hz, 3 H), 1.73 (s, 3 H), 1.53 (s, 3 H); **<sup>13</sup>C NMR** (100 MHz, CDCl<sub>3</sub>): δ 208.9, 170.0, 161.9, 139.9, 138.4, 132.2, 131.9, 131.7, 130.2, 129.4, 124.8, 121.4, 60.2, 55.6, 23.9, 22.9, 10.6; **HRMS** (ESI) *m/z* calculated for C<sub>21</sub>H<sub>19</sub>Br<sub>2</sub>NO<sub>2</sub>Na [M+Na]<sup>+</sup> 497.9675, found 497.9661; **MS** (EI) *m/z* (%): 477 (84), 475 (42), 420 (99), 154 (8), 115 (100); **IR** (KBr plate): 3276, 2958, 1700, 1655, 1491, 1336, 1076, 731 cm<sup>-1</sup>.

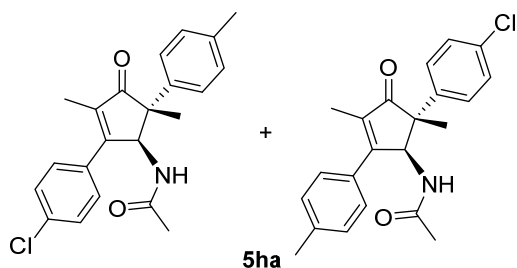

**5ha**: Following the general procedure A, reaction time: 20 min, 48h; mixture, 49% yield. **5ha**: DCM/MeOH (300:1–150:1) as the eluent, **<sup>1</sup>H NMR** (400 MHz, CDCl<sub>3</sub>): δ 7.45–7.35 (m, 7.4 H), 7.29–7.24 (m, 5.7 H), 7.13 (d, *J* = 8.0 Hz, 2 H), 5.91 (dd, *J* = 10.0, 2.0 Hz, 1 H), 5.85 (dd, *J* = 9.6 Hz, 2.0 Hz, 0.8 H), 5.52 (s, 1 H), 5.49 (s, 0.7 H), 2.40 (s, 2.4 H), 2.31 (s, 3 H), 2.06 (d, *J* = 1.6 Hz, 2.3 H), 2.04 (d, *J* = 1.6 Hz, 3 H), 1.92 (s, 5.3 H), 1.41 (d, *J* = 4.0 Hz, 5.3 H); **<sup>13</sup>C NMR** (100 MHz, CDCl<sub>3</sub>): δ 209.5, 209.1, 170.2, 170.1, 162.4, 160.9, 142.3, 140.8, 140.6, 137.3, 136.7, 136.3, 136.2, 132.9, 131.8, 130.2, 129.9, 129.7, 129.5, 129.2, 128.9, 128.6, 128.1, 126.3, 60.7, 54.4, 54.3, 23.23, 23.19, 21.6, 21.08, 21.05, 10.8, 10.7.



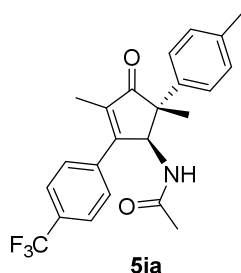

**5ia:** Following the general procedure A, reaction time: 20 min, 72h; 27.9 mg, 35% yield; dr: 6.7:1.

**5ia:** DCM/MeOH (300:1–150:1) as the eluent, a pale yellow amorphous solid. **<sup>1</sup>H NMR** (600 MHz, CDCl<sub>3</sub>): δ 7.68 (d, *J* = 8.4 Hz, 2 H), 7.57 (d, *J* = 8.4 Hz, 2 H), 7.27 (d, *J* = 8.4 Hz, 2 H), 7.13 (d, *J* = 7.8 Hz, 2 H), 5.96 (dd, *J* = 10.2 Hz, 1.8 Hz, 1 H), 5.73 (d, *J* = 10.2 Hz, 1 H), 2.31 (s, 3 H), 2.03 (d, *J* = 1.8 Hz, 3 H), 1.88 (s, 3 H), 1.42 (s, 3 H); **<sup>13</sup>C NMR** (150 MHz, CDCl<sub>3</sub>): δ 209.4, 170.1, 160.8, 140.4, 138.4, 137.0, 136.8, 131.7 (q, *J* = 33 Hz), 129.6, 128.8, 126.3, 125.8 (q, *J* = 4.5 Hz), 123.8 (q, *J* = 270 Hz), 60.8, 54.4, 23.1, 21.0, 10.5; **<sup>19</sup>F NMR** (376 MHz, CDCl<sub>3</sub>): δ -62.89; **HRMS** (ESI) *m/z* calculated for C<sub>23</sub>H<sub>23</sub>F<sub>3</sub>NO<sub>2</sub> [M+H]<sup>+</sup> 402.1675, found 402.1667; **MS** (EI) *m/z* (%): 401 (9), 256 (33), 115 (57), 91 (100); **IR** (KBr plate): 2925, 1707, 1652, 1537, 1324, 1068, 749 cm<sup>-1</sup>.

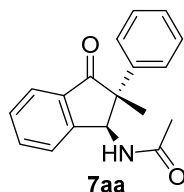

**7aa:** Following the general procedure B, reaction time: 1.5 h, 8 h; 39.1 mg, 70% yield; dr: 10.9:1.

**7aa:** DCM/MeOH (300:1–150:1) as the eluent, white solid, m.p. = 213.4–215.4 °C. **<sup>1</sup>H NMR** (400 MHz, CDCl<sub>3</sub>): δ 7.83 (d, *J* = 7.6 Hz, 1 H), 7.71–7.67 (m, 1 H), 7.55–7.49 (m, 2 H), 7.39–7.37 (m, 2 H), 7.32–7.28 (m, 2 H), 7.23–7.20 (m, 1 H), 5.96 (d, *J* = 9.2 Hz, 1 H), 5.88 (d, *J* = 9.2 Hz, 1 H), 2.08 (s, 3 H), 1.48 (s, 3 H); **<sup>13</sup>C NMR** (150 MHz, CDCl<sub>3</sub>): δ 207.0, 170.2, 151.6, 143.2, 135.9, 135.6, 129.7, 128.8, 127.1, 126.6, 126.3, 124.3, 59.5, 57.5, 23.2, 20.3; **HRMS** (ESI) *m/z* calculated for C<sub>18</sub>H<sub>17</sub>NO<sub>2</sub>Na [M+Na]<sup>+</sup> 302.1151, found 302.1138; **MS** (EI) *m/z* (%): 279 (29), 236 (14), 222 (100), 159 (6), 77 (48); **IR** (KBr plate): 3245, 2956, 2851, 1714, 1650, 1463, 1274, 1076, 757 cm<sup>-1</sup>.

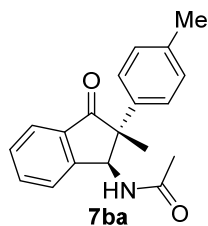

**7ba:** Following the general procedure B, reaction time: 0.5 h, 4 h; 34.3 mg, 58% yield; dr: 20:1.

**7ba:** DCM/MeOH (300:1–150:1) as the eluent, white solid, m.p. = 208.6-209.9 °C. **<sup>1</sup>H NMR** (400 MHz, CDCl<sub>3</sub>): δ 7.79 (d, *J* = 7.6 Hz, 1 H), 7.66 (ddd, *J* = 7.6 Hz, 7.6 Hz, 0.8 Hz, 1 H), 7.53-7.47 (m, 2 H), 7.26-7.24 (m, 2 H), 7.10 (d, *J* = 8.0 Hz, 2 H), 5.98 (d, *J* = 9.6 Hz, 1 H), 5.92 (d, *J* = 9.2 Hz, 1 H), 2.29 (s, 3 H), 2.05 (s, 3 H), 1.45 (s, 3 H); **<sup>13</sup>C NMR** (100 MHz, CDCl<sub>3</sub>): δ 207.1, 170.1, 151.6, 140.2, 136.7, 135.9, 135.6, 129.7, 129.5, 126.5, 126.2, 124.3, 59.6, 57.3, 23.3, 21.1, 20.3; **HRMS** (ESI) *m/z* calculated for C<sub>19</sub>H<sub>19</sub>NO<sub>2</sub>Na [M+Na]<sup>+</sup> 316.1308, found 316.1297; **MS** (EI) *m/z* (%): 293 (60), 236 (100), 234 (93), 174 (2), 77 (18); **IR** (KBr plate): 3525, 2954, 2869, 1719, 1650, 1461, 1274, 1076, 751 cm<sup>-1</sup>.

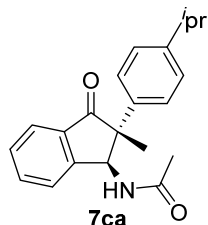

**7ca:** Following the general procedure B, reaction time: 1 h, 8 h; 43.0 mg, 67% yield; dr: 16.9:1.

**7ca:** DCM/MeOH (300:1–150:1) as the eluent, white solid, m.p. = 170.8-172.5 °C. **<sup>1</sup>H NMR** (400 MHz, CDCl<sub>3</sub>): δ 7.73 (d, *J* = 7.6 Hz, 1 H), 7.62 (ddd, *J* = 7.6 Hz, 7.6 Hz, 0.8 Hz, 1 H), 7.49-7.42 (m, 2 H), 7.25-7.23 (m, 2 H), 7.15-7.12 (m, 2 H), 6.39 (d, *J* = 9.6 Hz, 1 H), 5.87 (d, *J* = 9.6 Hz, 1 H), 2.90-2.79 (m, 1 H), 1.96 (s, 3 H), 1.41 (s, 3 H), 1.21 (s, 3 H), 1.19 (s, 3 H); **<sup>13</sup>C NMR** (100 MHz, CDCl<sub>3</sub>): δ 207.3, 170.3, 151.8, 147.4, 140.5, 135.8, 135.5, 129.5, 126.7, 126.4, 126.3, 124.2, 59.4, 57.2, 33.7, 24.0, 23.1, 20.2; **HRMS** (ESI) *m/z* calculated for C<sub>21</sub>H<sub>23</sub>NO<sub>2</sub>Na [M+Na]<sup>+</sup> 344.1621, found 344.1606; **MS** (EI) *m/z* (%): 321 (89), 264 (100), 160 (29), 119 (3), 77 (17); **IR** (KBr plate): 3275, 2960, 2870, 1716, 1654, 1464, 1269, 960, 761 cm<sup>-1</sup>.

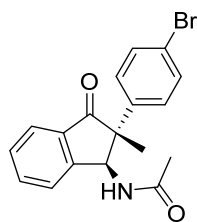

**7da**

**7da:** Following the general procedure B, reaction time: 1.5 h, 8 h; 45.9 mg, 64% yield; dr: 6.4:1. white solid, m.p. = 231.2-233.1 °C. 167.0-168.9 °C.

**7da:** DCM/MeOH (300:1–150:1) as the eluent, white solid, m.p. = 231.2-233.1 °C. <sup>1</sup>H NMR (400 MHz, CDCl<sub>3</sub>): δ 7.85 (d, *J* = 8.0 Hz, 1 H), 7.74-7.70 (m, 1 H), 7.57-7.52 (m, 2 H), 7.45-7.31 (m, 2 H), 7.31-7.28 (m, 2 H), 5.92 (d, *J* = 9.2 Hz, 1 H), 5.75 (d, *J* = 9.2 Hz, 1 H), 2.13 (s, 3 H), 1.47 (s, 3 H); <sup>13</sup>C NMR (100 MHz, (CD<sub>3</sub>)<sub>2</sub>SO): δ 206.2, 169.7, 152.2, 143.2, 136.1, 134.5, 131.3, 129.6, 128.8, 126.5, 123.6, 119.9, 58.8, 56.8, 22.5, 19.4; HRMS (ESI) *m/z* calculated for C<sub>18</sub>H<sub>16</sub>BrNO<sub>2</sub>Na [M+Na]<sup>+</sup> 380.0257, 382.0236, found 380.0249, 382.0217; MS (EI) *m/z* (%): 359 (22), 357 (22), 300 (100), 160 (40), 77 (25); IR (KBr plate): 3256, 2955, 2851, 1720, 1650, 1462, 1376, 1077, 759 cm<sup>-1</sup>.

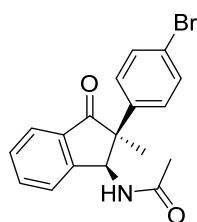

**7da'**

**7da':** DCM/MeOH (300:1–150:1) as the eluent, white solid, m.p. = 167.0-168.9 °C. <sup>1</sup>H NMR (400 MHz, CDCl<sub>3</sub>): δ 7.91-7.89 (m, 1 H), 7.75-7.71 (m, 1 H), 7.58-7.54 (m, 2 H), 7.42-7.39 (m, 2 H), 6.97-6.93 (m, 2 H), 5.66 (d, *J* = 9.6 Hz, 1 H), 5.18 (d, *J* = 9.2 Hz, 1 H), 1.78 (s, 3 H), 1.75 (s, 3 H); <sup>13</sup>C NMR (100 MHz, CDCl<sub>3</sub>): δ 206.6, 170.2, 151.7, 139.6, 136.4, 136.3, 131.7, 129.9, 129.4, 126.2, 124.4, 121.5, 59.4, 58.4, 23.11, 23.09; HRMS (ESI) *m/z* calculated for C<sub>18</sub>H<sub>16</sub>BrNO<sub>2</sub>Na [M+Na]<sup>+</sup> 380.0257, 382.0236, found 380.0241, 382.0219; MS (EI) *m/z* (%): 359 (22), 357 (23), 300 (100), 160 (43), 77 (32); IR (KBr plate): 3273, 2956, 2851, 1716, 1651, 1490, 1276, 1088, 760 cm<sup>-1</sup>.

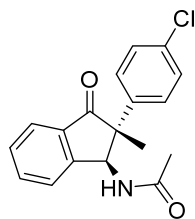

**7ea**

**7ea:** Following the general procedure B, reaction time: 1.5 h, 8 h; 43.2 mg, 69% yield; dr: 7.3:1.

**7ea:** DCM/MeOH (300:1–150:1) as the eluent, white solid, m.p. = 229.4–231.1 °C. **<sup>1</sup>H NMR** (400 MHz, CDCl<sub>3</sub>): δ 7.85 (d, *J* = 7.6 Hz, 1 H), 7.74–7.70 (m, 1 H), 7.57–7.52 (m, 2 H), 7.37–7.34 (m, 2 H), 7.29–7.26 (m, 2 H), 5.92 (d, *J* = 9.2 Hz, 1 H), 5.74 (d, *J* = 9.6 Hz, 1 H), 2.13 (s, 3 H), 1.47 (s, 3 H); **<sup>13</sup>C NMR** (100 MHz, CDCl<sub>3</sub>): δ 206.3, 170.1, 151.3, 141.7, 136.2, 135.5, 133.1, 130.0, 128.9, 128.3, 126.2, 124.6, 59.5, 57.2, 23.4, 20.6; **HRMS** (ESI) *m/z* calculated for C<sub>18</sub>H<sub>16</sub>ClNO<sub>2</sub>Na [M+Na]<sup>+</sup> 336.0762, 338.0732, found 336.0751, 338.0722; **MS** (EI) *m/z* (%): 315 (11), 313 (30), 256 (100), 160 (35), 132 (21), 77 (19); **IR** (KBr plate): 3247, 2955, 2851, 1721, 1650, 1461, 1276, 1014, 760 cm<sup>-1</sup>.

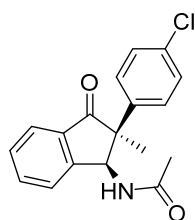

**7ea'**

**7ea':** DCM/MeOH (300:1–150:1) as the eluent, white solid, m.p. = 159.3–160.8 °C. **<sup>1</sup>H NMR** (400 MHz, CDCl<sub>3</sub>): δ 7.91–7.89 (m, 1 H), 7.75–7.71 (m, 1 H), 7.58–7.54 (m, 2 H), 7.27–7.24 (m, 2 H), 7.03–6.99 (m, 2 H), 5.66 (d, *J* = 9.6 Hz, 1 H), 5.17 (d, *J* = 9.6 Hz, 1 H), 1.79 (s, 3 H), 1.74 (s, 3 H); **<sup>13</sup>C NMR** (100 MHz, CDCl<sub>3</sub>): δ 206.7, 170.2, 151.7, 139.0, 136.34, 136.25, 133.4, 129.8, 129.0, 128.7, 126.2, 124.4, 59.4, 58.3, 23.2, 23.1; **HRMS** (ESI) *m/z* calculated for C<sub>18</sub>H<sub>16</sub>ClNO<sub>2</sub>Na [M+Na]<sup>+</sup> 336.0762, 338.0732, found 336.0745, 338.0711; **MS** (EI) *m/z* (%): 315 (11), 313 (30), 256 (100), 160 (35), 132 (22), 77 (22); **IR** (KBr plate): 3276, 2956, 2850, 1712, 1656, 1461, 1276, 1014, 764 cm<sup>-1</sup>.

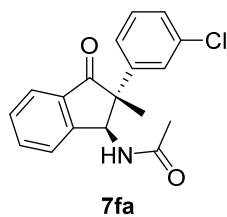

**7fa:** Following the general procedure B, reaction time: 1.5 h, 10 h; 29.8 mg, 47% yield; dr: 4.8:1. white solid, m.p. = 170.9-171.9 °C. 61.5-62.6 °C.

**7fa:** DCM/MeOH (300:1–150:1) as the eluent, white solid, m.p. = 170.9-171.9 °C. **<sup>1</sup>H NMR** (400 MHz, CDCl<sub>3</sub>): δ 7.82 (d, *J* = 7.6 Hz, 1 H), 7.70 (ddd, *J* = 7.6 Hz, 7.6 Hz, 1.2 Hz, 1 H), 7.55-7.50 (m, 2 H), 7.362-7.359 (m, 1 H), 7.28-7.19 (m, 3 H), 6.02 (d, *J* = 9.2 Hz, 1 H), 5.87 (d, *J* = 9.2 Hz, 1 H), 2.07 (s, 3 H), 1.45 (s, 3 H); **<sup>13</sup>C NMR** (100 MHz, CDCl<sub>3</sub>): δ 206.2, 170.2, 151.4, 145.2, 136.2, 135.3, 134.6, 130.0, 129.9, 127.4, 127.0, 126.2, 125.0, 124.5, 59.5, 57.3, 23.2, 20.3; **HRMS** (ESI) *m/z* calculated for C<sub>18</sub>H<sub>16</sub>ClNO<sub>2</sub>Na [M+Na]<sup>+</sup> 336.0762, 338.0732, found 336.0746, 338.0723; **MS** (EI) *m/z* (%): 315 (10), 313 (29), 256 (100), 160 (47), 132 (22), 77 (18); **IR** (KBr plate): 3272, 2955, 2870, 1715, 1656, 1462, 1288, 1092, 761 cm<sup>-1</sup>.

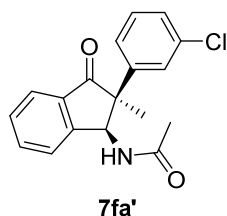

**7fa':** DCM/MeOH (300:1–150:1) as the eluent, white solid, m.p. = 61.5-62.6 °C. **<sup>1</sup>H NMR** (600 MHz, CDCl<sub>3</sub>): δ 7.90 (d, *J* = 7.8 Hz, 1 H), 7.75-7.72 (m, 1 H), 7.58-7.56 (m, 2 H), 7.24-7.20 (m, 2 H), 7.059-7.056 (m, 1 H), 6.97-6.96 (m, 1 H), 5.67 (d, *J* = 10.2 Hz, 1 H), 5.20 (d, *J* = 9.6 Hz, 1 H), 1.80 (s, 3 H), 1.74 (s, 3 H); **<sup>13</sup>C NMR** (150 MHz, CDCl<sub>3</sub>): δ 206.4, 170.2, 151.6, 142.6, 136.31, 136.29, 134.6, 129.9, 129.8, 127.9, 127.7, 126.2, 125.8, 124.5, 59.4, 58.6, 23.1, 23.0; **HRMS** (ESI) *m/z* calculated for C<sub>18</sub>H<sub>16</sub>ClNO<sub>2</sub>Na [M+Na]<sup>+</sup> 336.0762, 338.0732, found 336.0746, 338.0740; **MS** (EI) *m/z* (%): 315 (11), 313 (31), 256 (100), 160 (52), 132 (29), 77 (31); **IR** (KBr plate): 3275, 2957, 2851, 1714, 1657, 1463, 1265, 1087, 746 cm<sup>-1</sup>.

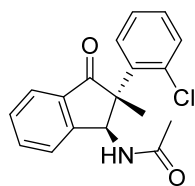

**7ga**

**7ga:** Following the general procedure B, reaction time: 2 h, 10 h; 26.0 mg, 41% yield; dr: 2.8:1. white solid, m.p. = 238.5-240.2 °C. 55.1-57.0 °C.

**7ga:** DCM/MeOH (300:1–150:1) as the eluent, white solid, m.p. = 238.5-240.2 °C. **<sup>1</sup>H NMR** (400 MHz, CDCl<sub>3</sub>): δ 7.88-7.86 (m, 1 H), 7.70 (ddd, *J* = 7.6 Hz, 7.6 Hz, 0.8 Hz, 1 H), 7.55-7.51 (m, 2 H), 7.40 (dd, *J* = 7.6 Hz, 1.6 Hz, 1 H), 7.36 (dd, *J* = 7.6 Hz, 1.6 Hz, 1 H), 7.32-7.23 (m, 2 H), 6.14 (d, *J* = 9.2 Hz, 1 H), 5.85 (d, *J* = 9.2 Hz, 1 H), 2.04 (s, 3 H), 1.43 (s, 3 H); **<sup>13</sup>C NMR** (100 MHz, CDCl<sub>3</sub>): δ 204.9, 170.0, 150.4, 139.2, 135.3, 135.2, 133.2, 130.7, 129.5, 129.4, 129.1, 127.1, 125.1, 124.5, 57.6, 57.4, 23.3, 19.5; **HRMS** (ESI) *m/z* calculated for C<sub>18</sub>H<sub>16</sub>ClNO<sub>2</sub>Na [M+Na]<sup>+</sup> 336.0762, 338.0732, found 336.0756, 338.0725; **MS** (EI) *m/z* (%): 313 (42), 315 (14), 256 (100), 160 (57), 132 (25), 77 (25); **IR** (KBr plate): 2954, 2851, 1720, 1656, 1461, 1268, 1075, 765 cm<sup>-1</sup>.

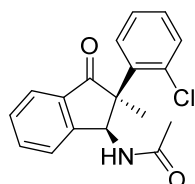

**7ga'**

**7ga':** DCM/MeOH (300:1–150:1) as the eluent, white solid, m.p. = 55.1-57.0 °C. **<sup>1</sup>H NMR** (400 MHz, CDCl<sub>3</sub>): δ 7.89 (d, *J* = 7.6 Hz, 1 H), 7.74-7.70 (m, 1 H), 7.63 (dd, *J* = 8.0 Hz, 1.6 Hz, 1 H), 7.58-7.54 (m, 2 H), 7.37-7.23 (m, 3 H), 6.02 (d, *J* = 7.6 Hz, 1 H), 5.57 (d, *J* = 9.2 Hz, 1 H), 1.79 (s, 3 H), 1.56 (s, 3 H); **<sup>13</sup>C NMR** (100 MHz, CDCl<sub>3</sub>): δ 206.1, 170.0, 149.9, 137.8, 136.1, 135.5, 133.7, 131.5, 129.9, 129.8, 129.2, 127.5, 126.2, 124.6, 60.4, 58.2, 25.1, 22.6; **HRMS** (ESI) *m/z* calculated for C<sub>18</sub>H<sub>16</sub>ClNO<sub>2</sub>Na [M+Na]<sup>+</sup> 336.0762, 338.0732, found 336.0758, 338.0727; **MS** (EI) *m/z* (%): 313 (7), 256 (4), 160 (2), 132 (5), 71 (100); **IR** (KBr plate): 2955, 2851, 1720, 1656, 1461, 1376, 753 cm<sup>-1</sup>.

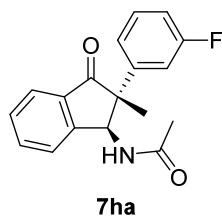

**7ha:** Following the general procedure B, reaction time: 2 h, 10 h; 26.5 mg, 45% yield; dr: 5.6:1.

**7ha:** DCM/MeOH (300:1–150:1) as the eluent, white solid, m.p. = 200.6-202.1 °C. **<sup>1</sup>H NMR** (400 MHz, CDCl<sub>3</sub>): δ 7.83 (d, *J* = 7.6 Hz, 1 H), 7.73-7.69 (m, 1 H), 7.56-7.50 (m, 2 H), 7.30-7.24 (m, 1 H), 7.16-7.10 (m, 2 H), 6.94-6.90 (m, 1 H), 5.94-5.89 (m, 2 H), 2.09 (s, 3 H), 1.46 (s, 3 H); **<sup>13</sup>C NMR** (150 MHz, CDCl<sub>3</sub>): δ 206.2, 170.2, 163.0 (d, *J* = 244.5 Hz), 151.4, 145.7 (d, *J* = 7.5 Hz), 136.2, 135.4 130.3 (d, *J* = 9 Hz), 129.9, 126.2, 124.6, 122.4 (d, *J* = 1.5 Hz), 114.10 (d, *J* = 19.5 Hz), 114.06 (d, *J* = 22.5 Hz), 59.5, 57.3, 23.3, 20.3; **<sup>19</sup>F NMR** (376 MHz, CDCl<sub>3</sub>): δ -112.22; **HRMS** (ESI) *m/z* calculated for C<sub>18</sub>H<sub>17</sub>FNO<sub>2</sub> [M+H]<sup>+</sup> 298.1238, found 298.1233; **MS** (EI) *m/z* (%): 297 (36), 240 (100), 160 (40), 132 (19), 77 (13); **IR** (KBr plate): 3245, 2955, 2851, 1719, 1650, 1462, 1249, 1076, 751 cm<sup>-1</sup>.

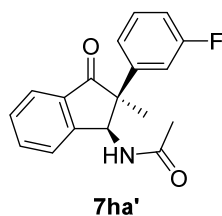

**7ha':** DCM/MeOH (300:1–150:1) as the eluent, white solid, m.p. = 132.9-134.5 °C. **<sup>1</sup>H NMR** (400 MHz, CDCl<sub>3</sub>): δ 7.91 (d, *J* = 7.6 Hz, 1 H), 7.76-7.72 (m, 1 H), 7.58-7.55 (m, 2 H), 7.29-7.23 (m, 1 H), 6.98-6.93 (m, 1 H), 6.85-6.78 (m, 2 H), 5.68 (d, *J* = 9.6 Hz, 1 H), 5.16 (d, *J* = 9.6 Hz, 1 H), 1.81 (s, 3 H), 1.74 (s, 3 H); **<sup>13</sup>C NMR** (150 MHz, CDCl<sub>3</sub>): δ 206.4, 170.2, 162.9 (d, *J* = 246 Hz), 151.8, 143.1 (d, *J* = 6 Hz), 136.3 (d, *J* = 16.5 Hz), 130.2 (d, *J* = 9 Hz), 129.9, 126.2, 124.5, 123.2 (d, *J* = 3 Hz), 114.8 (d, *J* = 21 Hz), 114.4 (d, *J* = 21 Hz), 59.4, 58.5, 23.1, 22.9; **<sup>19</sup>F NMR** (376 MHz, CDCl<sub>3</sub>): δ -111.74; **HRMS** (ESI) *m/z* calculated for C<sub>18</sub>H<sub>17</sub>FNO<sub>2</sub> [M+H]<sup>+</sup> 298.1238, found 298.1232; **MS** (EI) *m/z* (%): 297 (16), 240 (47), 160 (17), 132 (12), 71 (100); **IR** (KBr plate): 3275, 2956, 2850, 1714, 1657, 1462, 1265, 1087, 754 cm<sup>-1</sup>.

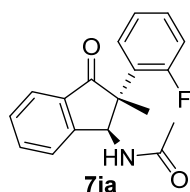

**7ia**: Following the general procedure B, reaction time: 1.5 h, 8 h; 26.3 mg, 44% yield; dr: 2.2:1.

**7ia**: DCM/MeOH (300:1–150:1) as the eluent, white solid, m.p. = 216.8–218.7 °C. <sup>1</sup>H NMR (400 MHz, CDCl<sub>3</sub>): δ 7.89–7.87 (m, 1 H), 7.72 (ddd, *J* = 7.2 Hz, 7.2 Hz, 0.8 Hz, 1 H), 7.56–7.52 (m, 2 H), 7.35 (ddd, *J* = 8 Hz, 8 Hz, 1.6 Hz, 1 H), 7.31–7.25 (m, 1 H), 7.16 (ddd, *J* = 7.6 Hz, 7.6 Hz, 1.2 Hz, 1 H), 7.01 (ddd, *J* = 11.6 Hz, 8.4 Hz, 1.2 Hz, 1 H), 5.89 (d, *J* = 9.2 Hz, 1 H), 5.79 (d, *J* = 9.2 Hz, 1 H), 2.08 (s, 3 H), 1.44 (s, 3 H); <sup>13</sup>C NMR (150 MHz, CDCl<sub>3</sub>): δ 205.6, 170.0, 160.4 (d, *J* = 244.5 Hz), 150.9, 135.7, 134.4, 129.8 (d, *J* = 13.5 Hz), 129.6, 129.4 (d, *J* = 9 Hz), 128.6 (d, *J* = 4.5 Hz), 125.3, 124.7, 124.4 (d, *J* = 3 Hz), 115.9 (d, *J* = 22.5 Hz), 58.7 (d, *J* = 3 Hz), 54.9, 23.3, 18.0; <sup>19</sup>F NMR (376 MHz, CDCl<sub>3</sub>): δ -110.89; HRMS (ESI) *m/z* calculated for C<sub>18</sub>H<sub>16</sub>FNO<sub>2</sub>Na [M+Na]<sup>+</sup> 320.1057, found 320.1047; MS (EI) *m/z* (%): 297 (30), 240 (100), 160 (38), 132 (17), 77 (15); IR (KBr plate): 2955, 2851, 1717, 1654, 1457, 1088, 747 cm<sup>-1</sup>.

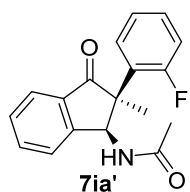

**7ia'**: DCM/MeOH (300:1–150:1) as the eluent, white solid, m.p. = 145.9–147.8 °C. <sup>1</sup>H NMR (400 MHz, CDCl<sub>3</sub>): δ 7.88 (d, *J* = 7.6 Hz, 1 H), 7.73 (ddd, *J* = 8.0 Hz, 8.0 Hz, 0.8 Hz, 1 H), 7.59–7.54 (m, 2 H), 7.50 (ddd, *J* = 7.6 Hz, 7.6 Hz, 1.6 Hz, 1 H), 7.31–7.26 (m, 1 H), 7.20 (ddd, *J* = 7.6 Hz, 7.6 Hz, 1.2 Hz, 1 H), 6.94 (ddd, *J* = 11.2 Hz, 8.0 Hz, 1.2 Hz, 1 H), 5.70 (d, *J* = 9.2 Hz, 1 H), 5.53 (d, *J* = 9.2 Hz, 1 H), 1.77 (s, 3 H), 1.55 (s, 3 H); <sup>13</sup>C NMR (100 MHz, CDCl<sub>3</sub>): δ 206.6 (d, *J* = 2 Hz), 170.0, 160.4 (d, *J* = 241 Hz), 150.2, 135.7, 135.2 (d, *J* = 2 Hz), 130.3 (d, *J* = 5 Hz), 129.8, 129.5 (d, *J* = 8 Hz), 127.2 (d, *J* = 15 Hz), 126.4, 124.74, 124.71, 114.8 (d, *J* = 22 Hz), 59.8, 56.0 (d, *J* = 2 Hz), 23.1, 22.5; <sup>19</sup>F NMR (376 MHz, CDCl<sub>3</sub>): δ -105.59; HRMS (ESI) *m/z* calculated for C<sub>18</sub>H<sub>16</sub>FNO<sub>2</sub>Na [M+Na]<sup>+</sup> 320.1057, found 320.1059; MS (EI) *m/z* (%): 297 (33), 240 (100), 160 (42), 132 (20), 77 (18); IR (KBr plate): 3276, 2958, 2851, 1721, 1657, 1490, 1266, 1090, 757 cm<sup>-1</sup>.



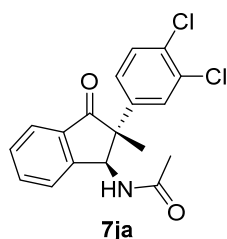

**7ja:** Following the general procedure B, reaction time: 1.5 h, 8 h; 27.8 mg, 40% yield; dr: 3.8:1.

**7ja:** DCM/MeOH (300:1–150:1) as the eluent, white solid, m.p. = 189.1-190.4 °C. **<sup>1</sup>H NMR** (400 MHz, CDCl<sub>3</sub>): δ 7.86 (d, *J*=7.6 Hz, 1 H), 7.76-7.72 (m, 1 H), 7.58-7.54 (m, 2 H), 7.51 (d, *J* = 2.4 Hz, 1 H), 7.38 (d, *J* = 8.4 Hz, 1 H), 7.29-7.26 (m, 1 H), 5.89 (d, *J* = 9.2 Hz, 1 H), 5.76 (d, *J* = 9.2 Hz, 1 H), 2.13 (s, 3 H), 1.46 (s, 3 H); **<sup>13</sup>C NMR** (100 MHz, CDCl<sub>3</sub>): δ 205.7, 170.2, 151.1, 143.4, 136.4, 135.2, 132.8, 131.4, 130.7, 130.1, 129.0, 126.5, 126.1, 124.7, 59.4, 57.1, 23.3, 20.6; **MS** (EI) *m/z* (%): 347 (19), 290 (100), 132 (28), 77 (16), 71 (16); **HRMS** (ESI) *m/z* calculated for C<sub>18</sub>H<sub>15</sub>Cl<sub>2</sub>NO<sub>2</sub>Na [M+Na]<sup>+</sup> 370.0372, found 370.0363; **IR** (KBr plate): 2955, 2851, 1717, 1656, 1463, 1275, 1076, 763 cm<sup>-1</sup>.

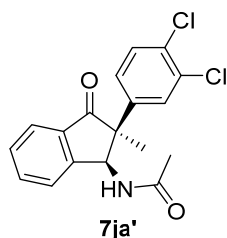

**7ja':** DCM/MeOH (300:1–150:1) as the eluent, white solid, m.p. = 160.6-162.4 °C. **<sup>1</sup>H NMR** (400 MHz, CDCl<sub>3</sub>): δ 7.90 (d, *J*=7.2 Hz, 1 H), 7.77-7.73 (m, 1 H), 7.59-7.56 (m, 2 H), 7.35 (d, *J* = 8.4 Hz, 1 H), 7.17 (d, *J* = 2.4 Hz, 1 H), 6.94 (dd, *J* = 8.4 Hz, 2.0 Hz, 1 H), 5.66 (d, *J* = 9.2 Hz, 1 H), 5.27 (d, *J* = 9.2 Hz, 1 H), 1.78 (s, 3 H), 1.77 (s, 3 H); **<sup>13</sup>C NMR** (100 MHz, CDCl<sub>3</sub>): δ 206.1, 170.2, 151.3, 140.8, 136.5, 136.1, 132.7, 131.6, 130.4, 130.0, 129.9, 127.2, 126.2, 124.6, 59.5, 58.3, 23.5, 23.1; **MS** (EI) *m/z* (%): 347 (17), 290 (82), 132 (31), 77 (20), 71 (100); **HRMS** (ESI) *m/z* calculated for C<sub>18</sub>H<sub>15</sub>Cl<sub>2</sub>NO<sub>2</sub>Na [M+Na]<sup>+</sup> 370.0372, found 370.0359; **IR** (KBr plate): 2955, 2852, 1716, 1654, 1457, 1261, 1088, 750 cm<sup>-1</sup>.

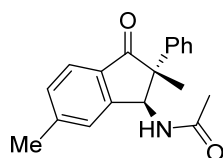

**7ka**

**7ka:** Following the general procedure B, reaction time: 0.5 h, 4 h; 35.2 mg, 60% yield; dr: 10.5:1.

**7ka:** DCM/MeOH (300:1–150:1) as the eluent, white solid, m.p. = 228.5-230.5 °C. **<sup>1</sup>H NMR** (400 MHz, CDCl<sub>3</sub>): δ 7.71 (d, *J* = 7.6 Hz, 1 H), 7.38-7.35 (m, 2 H), 7.33-7.26 (m, 4 H), 7.23-7.18 (m, 1 H), 5.91-5.85 (m, 2 H), 2.46 (s, 3 H), 2.09 (s, 3 H), 1.47 (s, 3 H); **<sup>13</sup>C NMR** (100 MHz, CDCl<sub>3</sub>): δ 206.4, 170.1, 152.1, 147.4, 143.4, 133.4, 131.0, 128.8, 127.0, 126.6, 126.5, 124.3, 59.5, 57.7, 23.4, 22.3, 20.3; **HRMS** (ESI) *m/z* calculated for C<sub>19</sub>H<sub>19</sub>NO<sub>2</sub>Na [M+Na]<sup>+</sup> 316.1308, found 316.1298; **MS** (EI) *m/z* (%): 293 (52), 236 (96), 234 (100), 174 (27), 77 (12); **IR** (KBr plate): 3233, 2955, 2852, 1708, 1657, 1461, 1276, 1076, 750 cm<sup>-1</sup>.

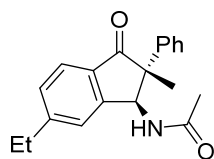

**7la**

**7la:** Following the general procedure B, reaction time: 1 h, 4 h; 38.2 mg, 62% yield; dr: 9.3:1.

**7la:** DCM/MeOH (300:1–150:1) as the eluent, white solid, m.p. = 182.5-183.8 °C. **<sup>1</sup>H NMR** (400 MHz, CDCl<sub>3</sub>): δ 7.75 (d, *J* = 8.4 Hz, 1 H), 7.39-7.28 (m, 6 H), 7.23-7.19 (m, 1 H), 5.92 (d, *J* = 9.6 Hz, 1 H), 5.82 (d, *J* = 9.2 Hz, 1 H), 2.75 (q, *J* = 7.6 Hz, 2 H), 2.11 (s, 3 H), 1.48 (s, 3 H), 1.28 (t, *J* = 7.6 Hz, 3 H); **<sup>13</sup>C NMR** (100 MHz, CDCl<sub>3</sub>): δ 206.6, 170.2, 153.6, 152.2, 143.5, 133.5, 129.8, 128.7, 127.0, 126.6, 125.3, 124.3, 59.5, 57.7, 29.5, 23.2, 20.2, 15.4; **HRMS** (ESI) *m/z* calculated for C<sub>20</sub>H<sub>21</sub>NO<sub>2</sub>Na [M+Na]<sup>+</sup> 330.1465, found 330.1452; **MS** (EI) *m/z* (%): 307 (46), 248 (100), 236 (5), 160 (14), 77 (12); **IR** (KBr plate): 3273, 2965, 2871, 1712, 1655, 1444, 1275, 1097, 764 cm<sup>-1</sup>.

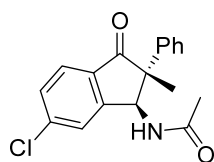

**7ma**

**7ma:** Following the general procedure B, reaction time: 2 h, 8 h; 26.5 mg, 42% yield; dr: 10.2:1.

**7ma:** DCM/MeOH (300:1–150:1) as the eluent, white solid, m.p. = 224.5-226.1 °C. **<sup>1</sup>H NMR** (400 MHz, CDCl<sub>3</sub>): δ 7.75 (d, *J* = 8.4 Hz, 1 H), 7.530-7.526 (m, 1 H), 7.47 (dd, *J* = 8.4 Hz, 1.6 Hz, 1 H), 7.36-7.29 (m, 4 H), 7.25-7.21 (m, 1 H), 5.98 (d, *J* = 9.2 Hz, 1 H), 5.93 (d, *J* = 9.2 Hz, 1 H), 2.08 (s, 3 H), 1.47 (s, 3 H); **<sup>13</sup>C NMR** (100 MHz, CDCl<sub>3</sub>): δ 205.5, 170.2, 153.2, 142.7, 142.5, 133.9, 130.5, 128.9, 127.3, 126.6, 126.5, 125.6, 59.1, 57.7, 23.3, 20.4; **HRMS** (ESI) *m/z* calculated for C<sub>18</sub>H<sub>16</sub>ClNO<sub>2</sub>Na [M+Na]<sup>+</sup> 336.0762, 338.0732, found 336.0747, 338.0722; **MS** (EI) *m/z* (%): 315 (13), 313 (34), 258 (28), 256 (100), 77 (15); **IR** (KBr plate): 3461, 2955, 2851, 1716, 1650, 1274, 1076, 750 cm<sup>-1</sup>.

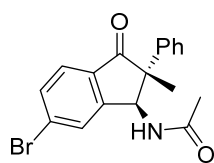

**7na**

**7na:** Following the general procedure B, reaction time: 2 h, 10 h; 31.1 mg, 43% yield; dr: 11.2:1.

**7na:** DCM/MeOH (300:1–150:1) as the eluent, white solid, m.p. = 229.0-230.9 °C. **<sup>1</sup>H NMR** (400 MHz, CDCl<sub>3</sub>): δ 7.71-7.63 (m, 3 H), 7.36-7.29 (m, 4 H), 7.25-7.21 (m, 1 H), 5.96-5.91 (m, 2 H), 2.09 (s, 3 H), 1.48 (s, 3 H); **<sup>13</sup>C NMR** (150 MHz, CDCl<sub>3</sub>): δ 205.7, 170.1, 153.2, 142.6, 134.3, 133.4, 131.3, 129.6, 128.9, 127.3, 126.6, 125.6, 59.0, 57.7, 23.4, 20.4; **HRMS** (ESI) *m/z* calculated for C<sub>18</sub>H<sub>16</sub>BrNO<sub>2</sub>Na [M+Na]<sup>+</sup> 380.0257, found 380.0239; **MS** (EI) *m/z* (%): 359 (25), 357 (25), 300 (100), 235 (2), 77 (16); **IR** (KBr plate): 3256, 2955, 2869, 1719, 1656, 1460, 1274, 1054, 750 cm<sup>-1</sup>.

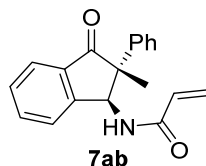

**7ab:** Following the general procedure B, reaction time: 1.5 h, 8 h; 35.0 mg, 60% yield; dr: 10.0:1.

**7ab:** Petroleum ether/ethyl acetate (5:1) as the eluent, white solid, m.p. = 156.9-158.7 °C. <sup>1</sup>H NMR (600 MHz, CDCl<sub>3</sub>): δ 7.86 (d, *J* = 7.2 Hz, 1 H), 7.71-7.68 (m, 1 H), 7.56 (d, *J* = 7.8 Hz, 1 H), 7.53 (dd, *J* = 7.8 Hz, 7.8 Hz, 1 H), 7.43-7.41 (m, 2 H), 7.33-7.30 (m, 2 H), 7.24-7.21 (m, 1 H), 6.41 (dd, *J* = 16.8 Hz, 1.2 Hz, 1 H), 6.18 (dd, *J* = 17.4 Hz, 10.8 Hz, 1 H), 6.06 (d, *J* = 9.6 Hz, 1 H), 5.83 (d, *J* = 9.6 Hz, 1 H), 5.76 (dd, *J* = 10.2 Hz, 1.2 Hz, 1 H), 1.51 (s, 3 H); <sup>13</sup>C NMR (100 MHz, CDCl<sub>3</sub>): δ 207.1, 165.7, 151.5, 143.2, 135.8, 135.4, 130.1, 129.6, 128.7, 127.6, 127.0, 126.5, 126.3, 124.1, 59.5, 57.6, 20.2; HRMS (ESI) *m/z* calculated for C<sub>19</sub>H<sub>18</sub>NO<sub>2</sub> [M+H]<sup>+</sup> 292.1332, found 292.1329; MS (EI) *m/z* (%): 291 (65), 178 (73), 130 (42), 103 (95), 77 (100); IR (KBr plate): 3276, 3056, 2930, 1716, 1658, 1464, 1231, 1076, 759 cm<sup>-1</sup>.

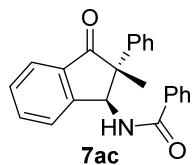

**7ac:** Following the general procedure B, reaction time: 1.5 h, 8 h; 48.5 mg, 71% yield; dr: 7.5:1.

**7ac:** Petroleum ether/ethyl acetate (7:1) as the eluent, white solid, m.p. = 193.2-195.0 °C. <sup>1</sup>H NMR (600 MHz, CDCl<sub>3</sub>): δ 7.86 (d, *J* = 7.8 Hz, 1 H), 7.81 (d, *J* = 7.8 Hz, 2 H), 7.69 (dd, *J* = 7.8 Hz, 7.8 Hz, 1 H), 7.59 (d, *J* = 7.8 Hz, 1 H), 7.55-7.51 (m, 2 H), 7.46-7.43 (m, 4 H), 7.32 (dd, *J* = 7.8 Hz, 7.8 Hz, 2 H), 7.23 (dd, *J* = 7.2 Hz, 7.2 Hz, 1 H), 6.52 (d, *J* = 9.0 Hz, 1 H), 6.16 (d, *J* = 9.6 Hz, 1 H), 1.57 (s, 3 H); <sup>13</sup>C NMR (150 MHz, CDCl<sub>3</sub>): δ 207.0, 167.5, 151.5, 143.3, 136.1, 135.8, 133.9, 132.2, 129.9, 128.9, 128.8, 127.2, 126.7, 126.4, 124.5, 60.0, 57.9, 20.4; HRMS (ESI) *m/z* calculated for C<sub>23</sub>H<sub>20</sub>NO<sub>2</sub> [M+H]<sup>+</sup> 342.1489, found 342.1483; MS (EI) *m/z* (%): 341 (3), 220 (4), 130 (4), 105 (100), 77 (54); IR (KBr plate): 3293, 3056, 2977, 1714, 1640, 1490, 1267, 757 cm<sup>-1</sup>.

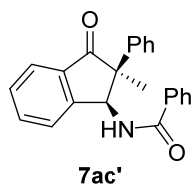

**7ac'**: Petroleum ether/ethyl acetate (7:1) as the eluent, white solid, m.p. = 156.9-158.7 °C. **<sup>1</sup>H NMR** (600 MHz, CDCl<sub>3</sub>): δ 7.95 (d, *J* = 7.8 Hz, 1 H), 7.72 (dd, *J* = 7.2 Hz, 7.2 Hz, 1 H), 7.63 (d, *J* = 7.8 Hz, 1 H), 7.57 (dd, *J* = 7.2 Hz, *J* = 7.2 Hz, 1 H), 7.42 (dd, *J* = 7.2 Hz, 7.2 Hz, 1 H), 7.30-7.27 (m, 5 H), 7.21 (d, *J* = 7.8 Hz, 2 H), 7.13 (d, *J* = 7.2 Hz, 2 H), 5.90 (d, *J* = 9.6 Hz, 1 H), 5.78 (d, *J* = 9.0 Hz, 1 H), 1.98 (s, 3H); **<sup>13</sup>C NMR** (150 MHz, CDCl<sub>3</sub>): δ 207.0, 167.6, 152.3, 140.6, 136.7, 136.2, 134.1, 131.8, 129.7, 129.1, 128.6, 127.7, 127.4, 126.7, 126.5, 124.3, 59.5, 58.7, 22.6; **HRMS** (ESI) *m/z* calculated for C<sub>23</sub>H<sub>20</sub>NO<sub>2</sub> [M+H]<sup>+</sup> 342.1489, found 342.1484; **MS** (EI) *m/z* (%): 341 (2), 155 (100), 127 (63), 105 (17), 77 (32); **IR** (KBr plate): 3309, 3057, 2913, 1713, 1641, 1489, 1266, 754 cm<sup>-1</sup>.

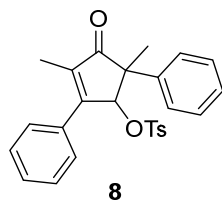

**8**: Petroleum ether/ethyl acetate (15:1) as the eluent, a pale yellow amorphous solid. **<sup>1</sup>H NMR** (600 MHz, CDCl<sub>3</sub>): δ 7.37-7.33 (m, 5 H), 7.31-7.28 (m, 3 H), 7.24-7.23 (m, 2 H), 7.21-7.20 (m, 2 H), 7.06 (d, *J* = 8.4 Hz, 2 H), 6.08 (d, *J* = 1.2 Hz, 1 H), 2.38 (s, 3H), 1.96 (d, *J* = 1.2 Hz, 3 H), 1.60 (s, 3H); **<sup>13</sup>C NMR** (150 MHz, CDCl<sub>3</sub>): δ 207.4, 160.5, 144.7, 142.3, 140.3, 133.6, 132.7, 129.7, 129.5, 129.0, 128.6, 128.1, 127.8, 127.4, 126.5, 88.9, 54.8, 21.7, 19.2, 10.1; **HRMS** (ESI) *m/z* calculated for C<sub>26</sub>H<sub>24</sub>O<sub>4</sub>SNa [M+Na]<sup>+</sup> 455.1288, found 455.1281; **MS** (EI) *m/z* (%): 432 (5), 262 (22), 235 (100), 105 (96), 77 (26).

## 4. X-Ray crystallography Data

### 4.1 X-Ray crystallography of compound 5aa

The crystal of compound **5aa** for X-ray diffraction study was obtained through the dissolving of compound in ethyl acetate and petroleum ether, followed by slow evaporation of the solvent at room temperature. X-ray data collections were performed in an Agilent Super Nova.

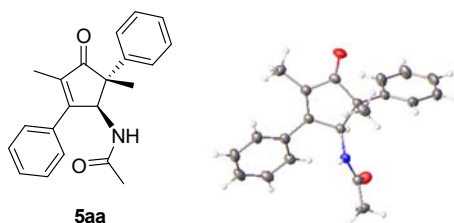

**Figure S1.** X-Ray coordinate of precursor **5aa** (CCDC 2408876). Displacement ellipsoids are scaled to the 30% probability level.

|                                             |                                                               |
|---------------------------------------------|---------------------------------------------------------------|
| Identification code                         | huyuehong_0707_auto                                           |
| Empirical formula                           | C <sub>21</sub> H <sub>21</sub> NO <sub>2</sub>               |
| Formula weight                              | 319.39                                                        |
| Temperature/K                               | 149.98(10)                                                    |
| Crystal system                              | orthorhombic                                                  |
| Space group                                 | Pbca                                                          |
| a/Å                                         | 9.38050(10)                                                   |
| b/Å                                         | 17.9125(3)                                                    |
| c/Å                                         | 20.6371(3)                                                    |
| α/°                                         | 90                                                            |
| β/°                                         | 90                                                            |
| γ/°                                         | 90                                                            |
| Volume/Å <sup>3</sup>                       | 3467.61(9)                                                    |
| Z                                           | 8                                                             |
| ρ <sub>calc</sub> /cm <sup>3</sup>          | 1.224                                                         |
| μ/mm <sup>-1</sup>                          | 0.619                                                         |
| F(000)                                      | 1360.0                                                        |
| Crystal size/mm <sup>3</sup>                | 0.15 × 0.03 × 0.02                                            |
| Radiation                                   | Cu Kα (λ = 1.54184)                                           |
| 2θ range for data collection/°              | 8.57 to 152.162                                               |
| Index ranges                                | -4 ≤ h ≤ 11, -22 ≤ k ≤ 19, -25 ≤ l ≤ 19                       |
| Reflections collected                       | 13330                                                         |
| Independent reflections                     | 3472 [R <sub>int</sub> = 0.0307, R <sub>sigma</sub> = 0.0293] |
| Data/restraints/parameters                  | 3472/0/220                                                    |
| Goodness-of-fit on F <sup>2</sup>           | 1.032                                                         |
| Final R indexes [I ≥ 2σ (I)]                | R <sub>1</sub> = 0.0393, wR <sub>2</sub> = 0.0998             |
| Final R indexes [all data]                  | R <sub>1</sub> = 0.0464, wR <sub>2</sub> = 0.1042             |
| Largest diff. peak/hole / e Å <sup>-3</sup> | 0.26/-0.23                                                    |

## 4.2 X-Ray crystallography of compound 5ea

The crystal of compound **5ea** for X-ray diffraction study was obtained through the dissolving of compound in ethyl acetate and petroleum ether, followed by slow evaporation of the solvent at room temperature. X-ray data collections were performed in an Agilent Super Nova.

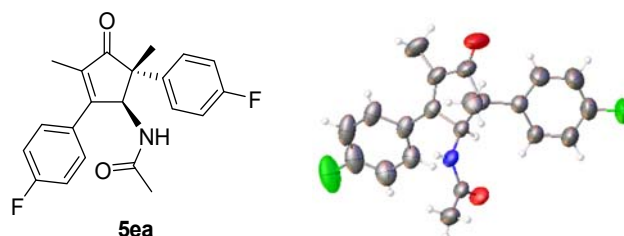

**Figure S2.** X-Ray coordinate of precursor **5ea** (CCDC 2408879). Displacement ellipsoids are scaled to the 30% probability level.

|                                             |                                                                |
|---------------------------------------------|----------------------------------------------------------------|
| Identification code                         | huyuehong1-zhfm_0426_auto                                      |
| Empirical formula                           | C <sub>21</sub> H <sub>19</sub> F <sub>2</sub> NO <sub>2</sub> |
| Formula weight                              | 355.37                                                         |
| Temperature/K                               | 271.8(9)                                                       |
| Crystal system                              | monoclinic                                                     |
| Space group                                 | Ia                                                             |
| a/Å                                         | 9.7705(2)                                                      |
| b/Å                                         | 13.1781(3)                                                     |
| c/Å                                         | 14.4870(4)                                                     |
| α/°                                         | 90                                                             |
| β/°                                         | 103.850(2)                                                     |
| γ/°                                         | 90                                                             |
| Volume/Å <sup>3</sup>                       | 1811.06(8)                                                     |
| Z                                           | 4                                                              |
| ρ <sub>calc</sub> /cm <sup>3</sup>          | 1.303                                                          |
| μ/mm <sup>-1</sup>                          | 0.812                                                          |
| F(000)                                      | 744.0                                                          |
| Crystal size/mm <sup>3</sup>                | 0.11 × 0.07 × 0.05                                             |
| Radiation                                   | Cu Kα (λ = 1.54184)                                            |
| 2θ range for data collection/°              | 9.196 to 155.122                                               |
| Index ranges                                | -11 ≤ h ≤ 8, -16 ≤ k ≤ 16, -18 ≤ l ≤ 18                        |
| Reflections collected                       | 12116                                                          |
| Independent reflections                     | 2762 [R <sub>int</sub> = 0.0321, R <sub>sigma</sub> = 0.0193]  |
| Data/restraints/parameters                  | 2762/2/238                                                     |
| Goodness-of-fit on F <sup>2</sup>           | 1.103                                                          |
| Final R indexes [I >= 2σ (I)]               | R <sub>1</sub> = 0.0372, wR <sub>2</sub> = 0.1048              |
| Final R indexes [all data]                  | R <sub>1</sub> = 0.0406, wR <sub>2</sub> = 0.1082              |
| Largest diff. peak/hole / e Å <sup>-3</sup> | 0.13/-0.17                                                     |
| Flack parameter                             | -0.08(11)                                                      |

### 4.3 X-Ray crystallography of compound 5ga'

The crystal of compound 5ga' for X-ray diffraction study was obtained through the dissolving of compound in ethyl acetate and chloroform, followed by slow evaporation of the solvent at room temperature. X-ray data collections were performed in an Agilent Super Nova.

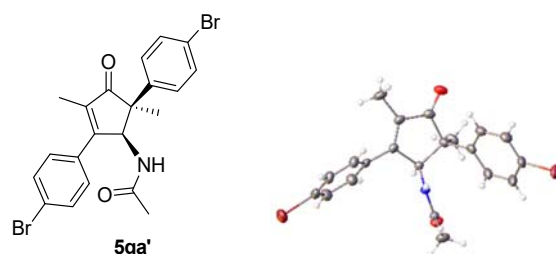

**Figure S3.** X-Ray coordinate of precursor 5ga' (CCDC 2410041). Displacement ellipsoids are scaled to the 30% probability level.

|                                             |                                                                 |
|---------------------------------------------|-----------------------------------------------------------------|
| Identification code                         | huyh 1211 auto                                                  |
| Empirical formula                           | C <sub>21</sub> H <sub>19</sub> Br <sub>2</sub> NO <sub>2</sub> |
| Formula weight                              | 477.19                                                          |
| Temperature/K                               | 149.99(10)                                                      |
| Crystal system                              | monoclinic                                                      |
| Space group                                 | I2/a                                                            |
| a/Å                                         | 16.9874(2)                                                      |
| b/Å                                         | 9.81932(13)                                                     |
| c/Å                                         | 24.6758(3)                                                      |
| $\alpha$ /°                                 | 90                                                              |
| $\beta$ /°                                  | 109.0437(14)                                                    |
| $\gamma$ /°                                 | 90                                                              |
| Volume/Å <sup>3</sup>                       | 3890.75(10)                                                     |
| Z                                           | 8                                                               |
| $\rho_{\text{calc}}/\text{cm}^3$            | 1.629                                                           |
| $\mu/\text{mm}^{-1}$                        | 5.404                                                           |
| F(000)                                      | 1904.0                                                          |
| Crystal size/mm <sup>3</sup>                | 0.25 × 0.12 × 0.04                                              |
| Radiation                                   | Cu K $\alpha$ ( $\lambda$ = 1.54184)                            |
| 2 $\theta$ range for data collection/°      | 7.58 to 152.192                                                 |
| Index ranges                                | -21 ≤ h ≤ 16, -11 ≤ k ≤ 12, -25 ≤ l ≤ 31                        |
| Reflections collected                       | 12974                                                           |
| Independent reflections                     | 3856 [R <sub>int</sub> = 0.0367, R <sub>sigma</sub> = 0.0253]   |
| Data/restraints/parameters                  | 3856/0/243                                                      |
| Goodness-of-fit on F <sup>2</sup>           | 1.038                                                           |
| Final R indexes [I ≥ 2 $\sigma$ (I)]        | R <sub>1</sub> = 0.0394, wR <sub>2</sub> = 0.1026               |
| Final R indexes [all data]                  | R <sub>1</sub> = 0.0414, wR <sub>2</sub> = 0.1044               |
| Largest diff. peak/hole / e Å <sup>-3</sup> | 1.77/-1.18                                                      |



#### 4.4 X-Ray crystallography of compound 7ea

The crystal of compound 7ea for X-ray diffraction study was obtained through the dissolving of compound in ethyl acetate and petroleum ether, followed by slow evaporation of the solvent at room temperature. X-ray data collections were performed in an Agilent Super Nova.

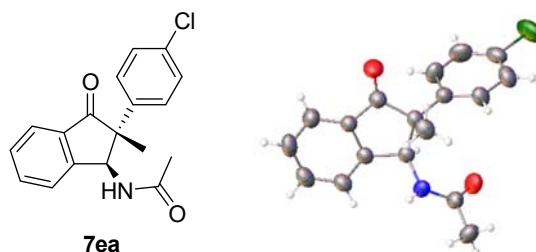

**Figure S4.** X-Ray coordinate of precursor 7ea (CCDC 2408878). Displacement ellipsoids are scaled to the 30% probability level.

|                                             |                                                                               |
|---------------------------------------------|-------------------------------------------------------------------------------|
| Identification code                         | huvuehong_0831_auto                                                           |
| Empirical formula                           | C <sub>36</sub> H <sub>32</sub> Cl <sub>2</sub> N <sub>2</sub> O <sub>4</sub> |
| Formula weight                              | 627.53                                                                        |
| Temperature/K                               | 301.46(10)                                                                    |
| Crystal system                              | monoclinic                                                                    |
| Space group                                 | P2 <sub>1</sub>                                                               |
| a/Å                                         | 9.74490(10)                                                                   |
| b/Å                                         | 12.6197(3)                                                                    |
| c/Å                                         | 12.8104(2)                                                                    |
| α/°                                         | 90                                                                            |
| β/°                                         | 91.761(2)                                                                     |
| γ/°                                         | 90                                                                            |
| Volume/Å <sup>3</sup>                       | 1574.65(5)                                                                    |
| Z                                           | 2                                                                             |
| ρ <sub>calc</sub> /cm <sup>3</sup>          | 1.324                                                                         |
| μ/mm <sup>-1</sup>                          | 2.197                                                                         |
| F(000)                                      | 656.0                                                                         |
| Crystal size/mm <sup>3</sup>                | 0.16 × 0.16 × 0.12                                                            |
| Radiation                                   | Cu Kα (λ = 1.54184)                                                           |
| 2θ range for data collection/°              | 6.904 to 155.844                                                              |
| Index ranges                                | -12 ≤ h ≤ 8, -15 ≤ k ≤ 15, -16 ≤ l ≤ 16                                       |
| Reflections collected                       | 11508                                                                         |
| Independent reflections                     | 5451 [R <sub>int</sub> = 0.0502, R <sub>sigma</sub> = 0.0480]                 |
| Data/restraints/parameters                  | 5451/1/410                                                                    |
| Goodness-of-fit on F <sup>2</sup>           | 1.097                                                                         |
| Final R indexes [I ≥ 2σ (I)]                | R <sub>1</sub> = 0.0449, wR <sub>2</sub> = 0.1198                             |
| Final R indexes [all data]                  | R <sub>1</sub> = 0.0513, wR <sub>2</sub> = 0.1306                             |
| Largest diff. peak/hole / e Å <sup>-3</sup> | 0.25/-0.30                                                                    |
| Flack parameter                             | 0.268(10)                                                                     |

#### 4.5 X-Ray crystallography of compound 7ia

The crystal of compound **7ia** for X-ray diffraction study was obtained through the dissolving of compound in dichloromethane, followed by slow evaporation of the solvent at room temperature. X-ray data collections were performed in an Agilent Super Nova.

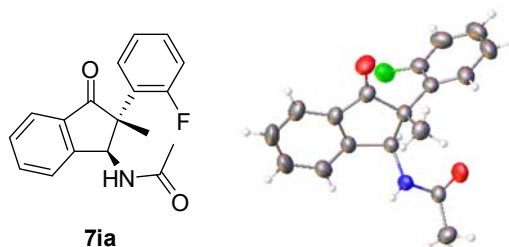

**Figure S5.** X-Ray coordinate of precursor **7ia** (CCDC 2408877). Displacement ellipsoids are scaled to the 30% probability level.

|                                             |                                                               |
|---------------------------------------------|---------------------------------------------------------------|
| Identification code                         | huvuehong2-zhfm_0426_auto                                     |
| Empirical formula                           | C <sub>18</sub> H <sub>16</sub> FNO <sub>2</sub>              |
| Formula weight                              | 297.32                                                        |
| Temperature/K                               | 271.7(3)                                                      |
| Crystal system                              | monoclinic                                                    |
| Space group                                 | P2 <sub>1</sub> /n                                            |
| a/Å                                         | 8.35635(9)                                                    |
| b/Å                                         | 20.16774(19)                                                  |
| c/Å                                         | 9.47069(10)                                                   |
| α/°                                         | 90                                                            |
| β/°                                         | 111.5299(12)                                                  |
| γ/°                                         | 90                                                            |
| Volume/Å <sup>3</sup>                       | 1484.72(3)                                                    |
| Z                                           | 4                                                             |
| ρ <sub>calc</sub> /cm <sup>3</sup>          | 1.330                                                         |
| μ/mm <sup>-1</sup>                          | 0.783                                                         |
| F(000)                                      | 624.0                                                         |
| Crystal size/mm <sup>3</sup>                | 0.11 × 0.08 × 0.06                                            |
| Radiation                                   | Cu Kα (λ = 1.54184)                                           |
| 2θ range for data collection/°              | 12.108 to 154.988                                             |
| Index ranges                                | -10 ≤ h ≤ 10, -25 ≤ k ≤ 24, -11 ≤ l ≤ 11                      |
| Reflections collected                       | 19065                                                         |
| Independent reflections                     | 3061 [R <sub>int</sub> = 0.0223, R <sub>sigma</sub> = 0.0123] |
| Data/restraints/parameters                  | 3061/0/201                                                    |
| Goodness-of-fit on F <sup>2</sup>           | 1.084                                                         |
| Final R indexes [I ≥ 2σ (I)]                | R <sub>1</sub> = 0.0451, wR <sub>2</sub> = 0.1199             |
| Final R indexes [all data]                  | R <sub>1</sub> = 0.0467, wR <sub>2</sub> = 0.1214             |
| Largest diff. peak/hole / e Å <sup>-3</sup> | 0.27/-0.27                                                    |

## 5. References

- 1) Z. Daneshfara and A. Rostami, *RSC Adv.*, 2015, **5**, 104695.
- 2) S. Gelozia, Y. Kwon, R. McDonald and F. G. West, *Chem. Eur. J.* 2018, **24**, 6052.
- 3) C. J. Rieder, K. J. Winberg and F. G. West, *J. Org. Chem.* 2011, **76**, 50.
- 4) Y. Wei, J. Tang, X. Cong and X. Zeng, *Green Chem.*, 2013, **15**, 3165.
- 5) B. K. Pandia, S. Pattanaik and C. Gunanathan, *Tetrahedron* 2021, **101**, 132472.
- 6) C. D. Smith, G. Rosocha, L. Mui and R. A. Batey, *J. Org. Chem.* 2010, **75**, 4716
- 7) Z. Han, X. Feng and H. Du, *J. Org. Chem.* 2023, **88**, 16038.

## 6. Copies of $^1\text{H}$ and $^{13}\text{C}$ NMR spectra of products

$^1\text{H}$  NMR (400 MHz,  $\text{CDCl}_3$ )

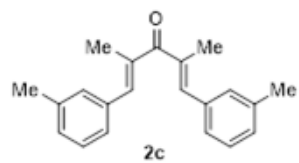

7.301  
7.283  
7.264  
7.249  
7.227  
7.183  
7.128  
7.110

2.363  
2.214  
2.211

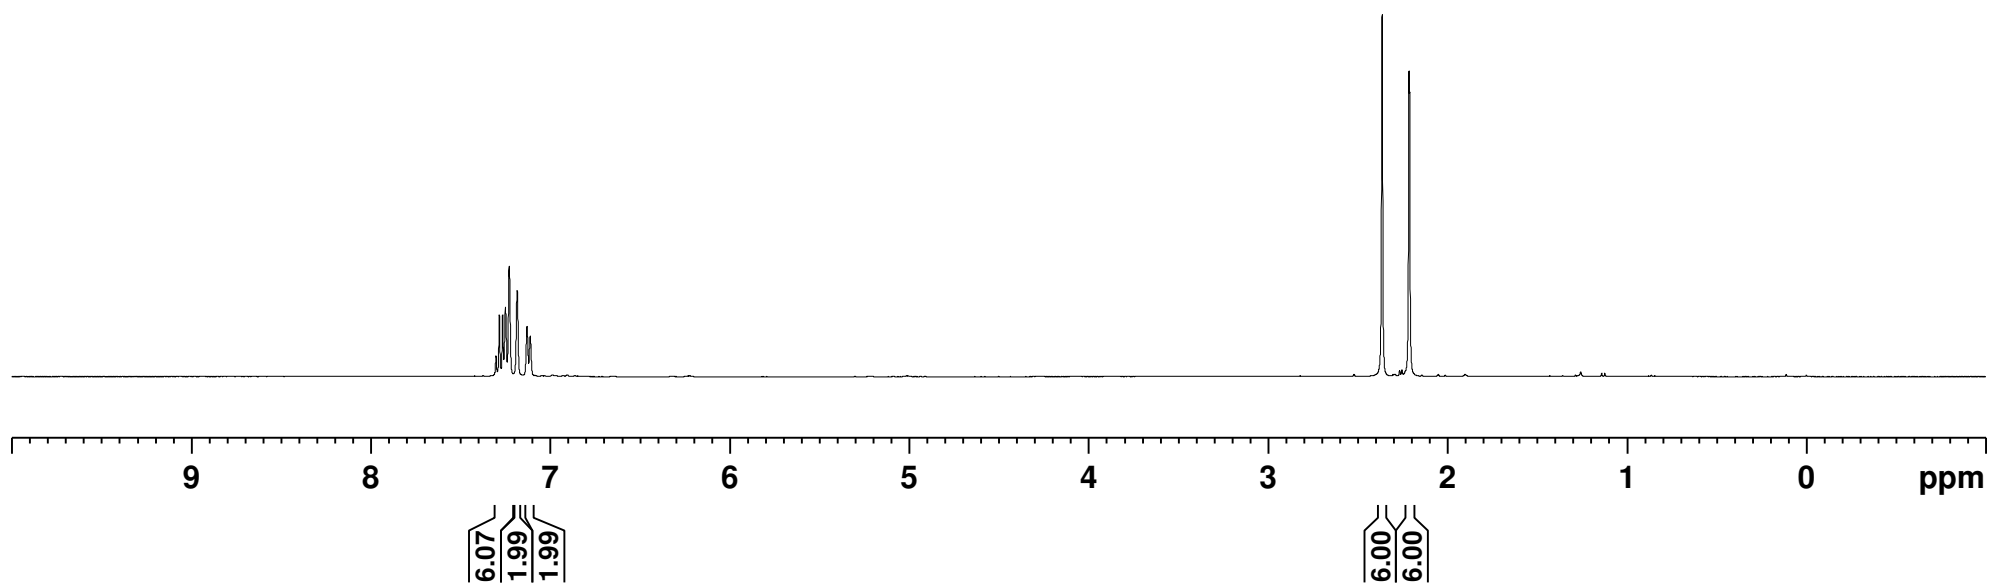

<sup>13</sup>C NMR (100 MHz, CDCl<sub>3</sub>)

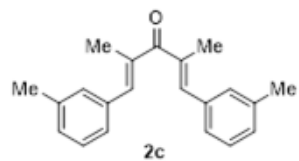

202.21

139.26  
138.10  
136.78  
135.99  
130.44  
129.12  
128.40  
126.72

77.47  
77.16  
76.84

21.49

15.02

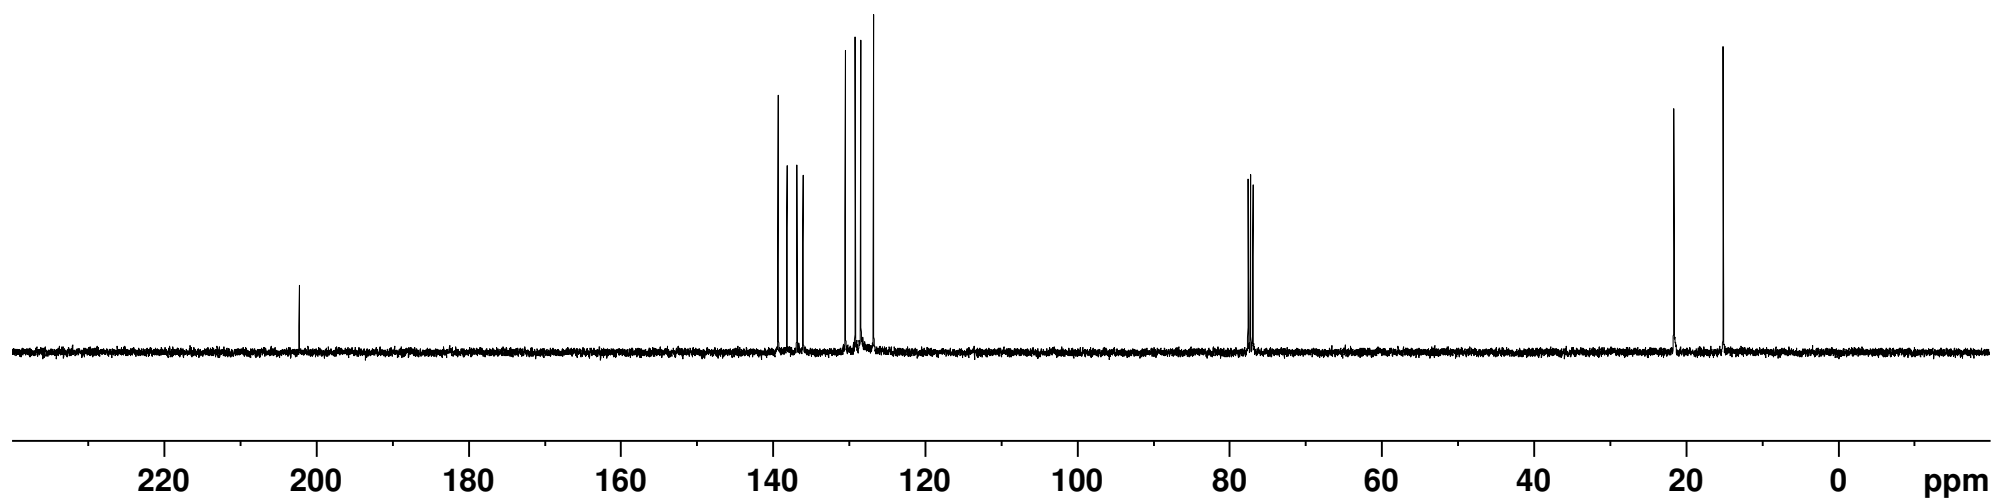

$^1\text{H}$  NMR (400 MHz,  $\text{CDCl}_3$ )

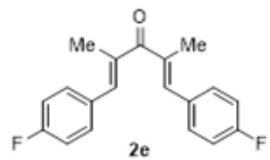

7.433  
7.419  
7.412  
7.398  
7.262  
7.145  
7.124  
7.102  
7.081

2.189

0.081  
-0.000

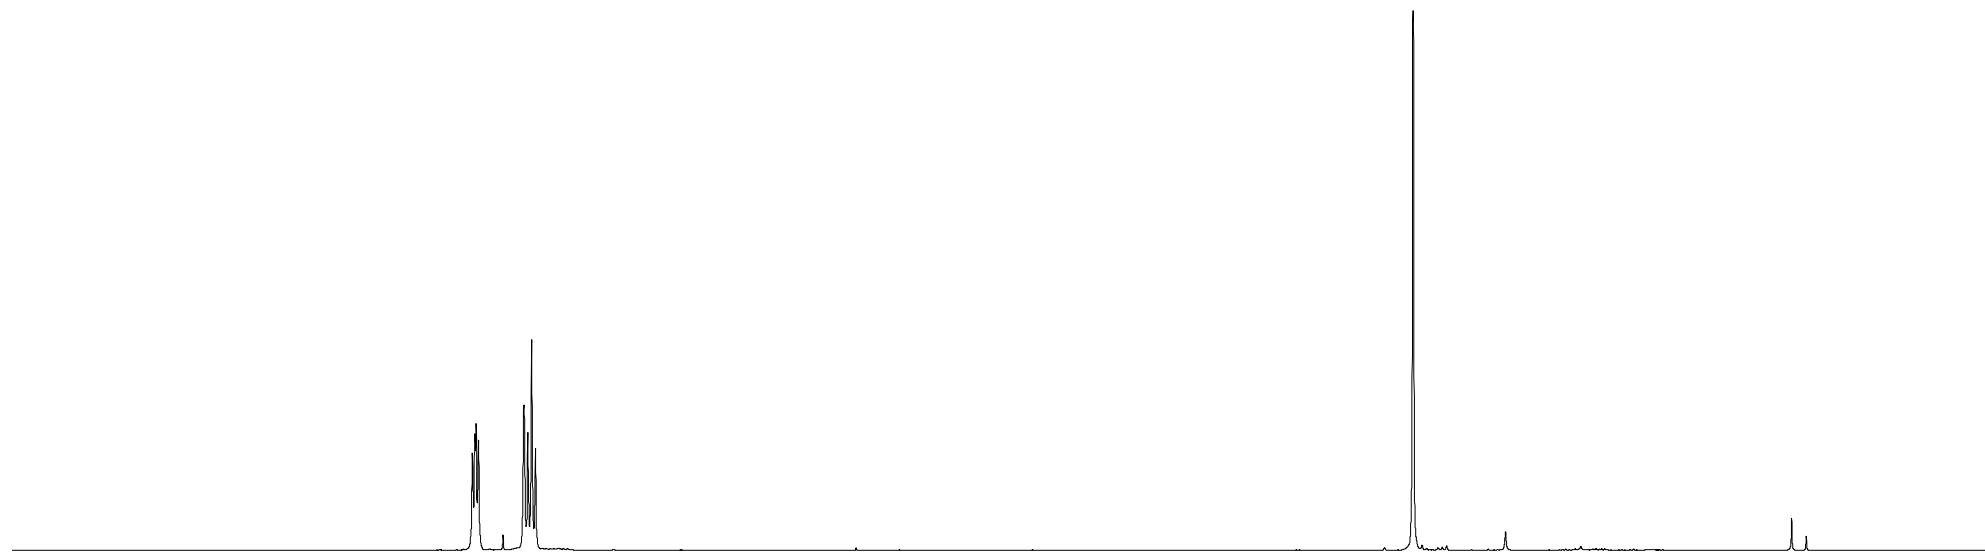

9

8

6

5

4

3

2

1

0

ppm

4.03

6.03

6.00

<sup>13</sup>C NMR (100 MHz, CDCl<sub>3</sub>)

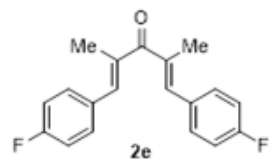

201.79  
163.80  
161.33  
137.91  
136.79  
136.78  
132.11  
132.07  
131.61  
131.53  
115.79  
115.57  
77.47  
77.16  
76.84  
15.01

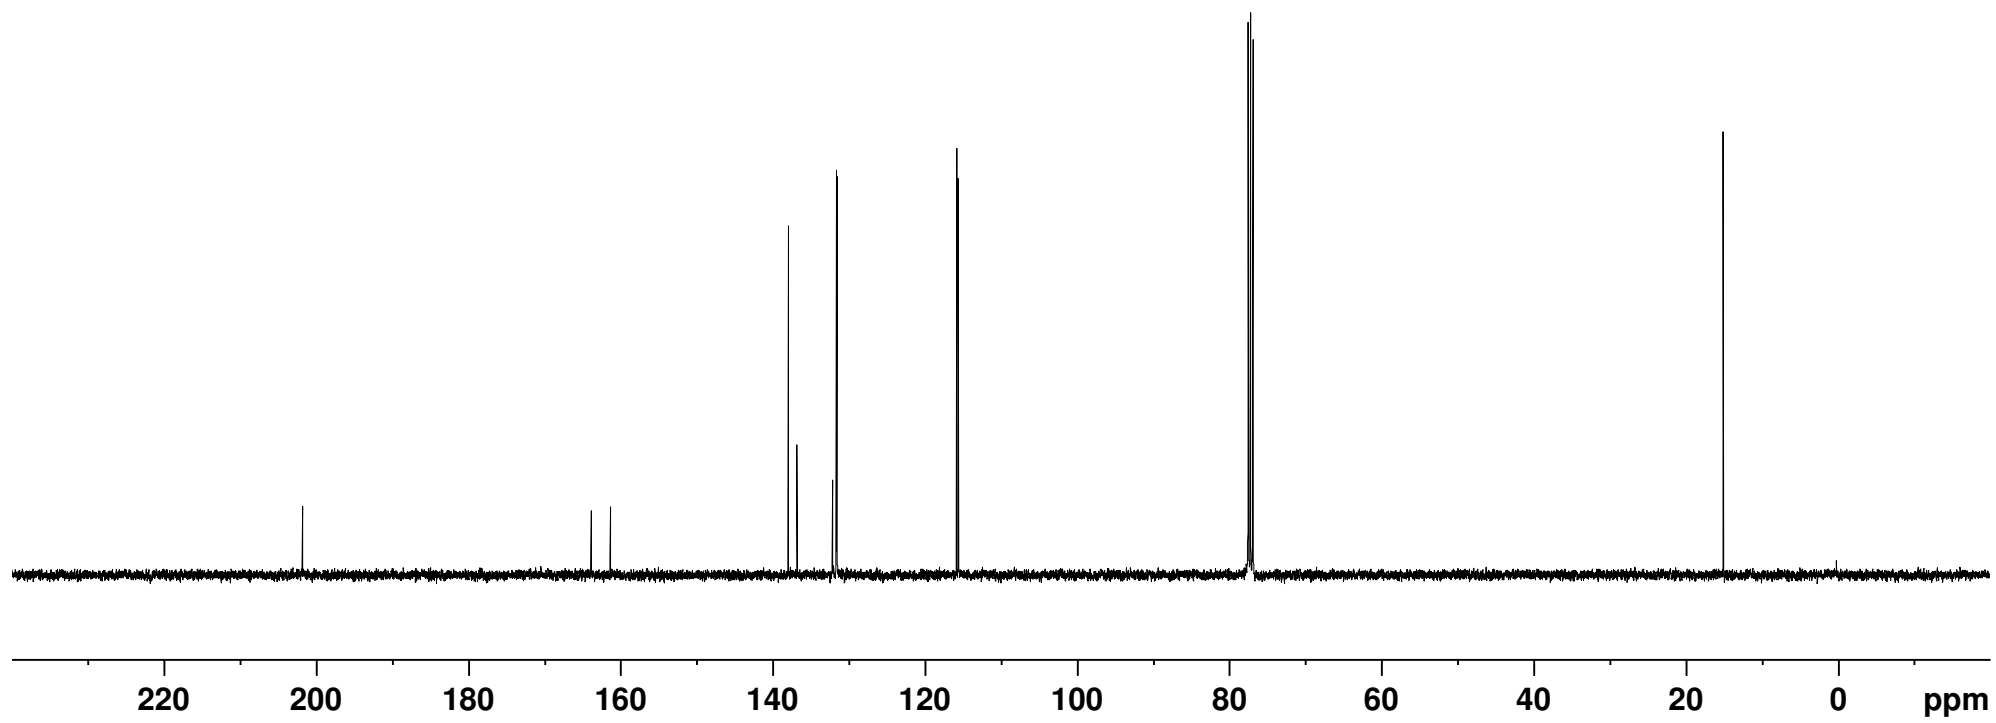

**$^{19}\text{F}$  NMR (376 MHz,  $\text{CDCl}_3$ )**

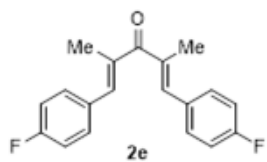

— -112.301

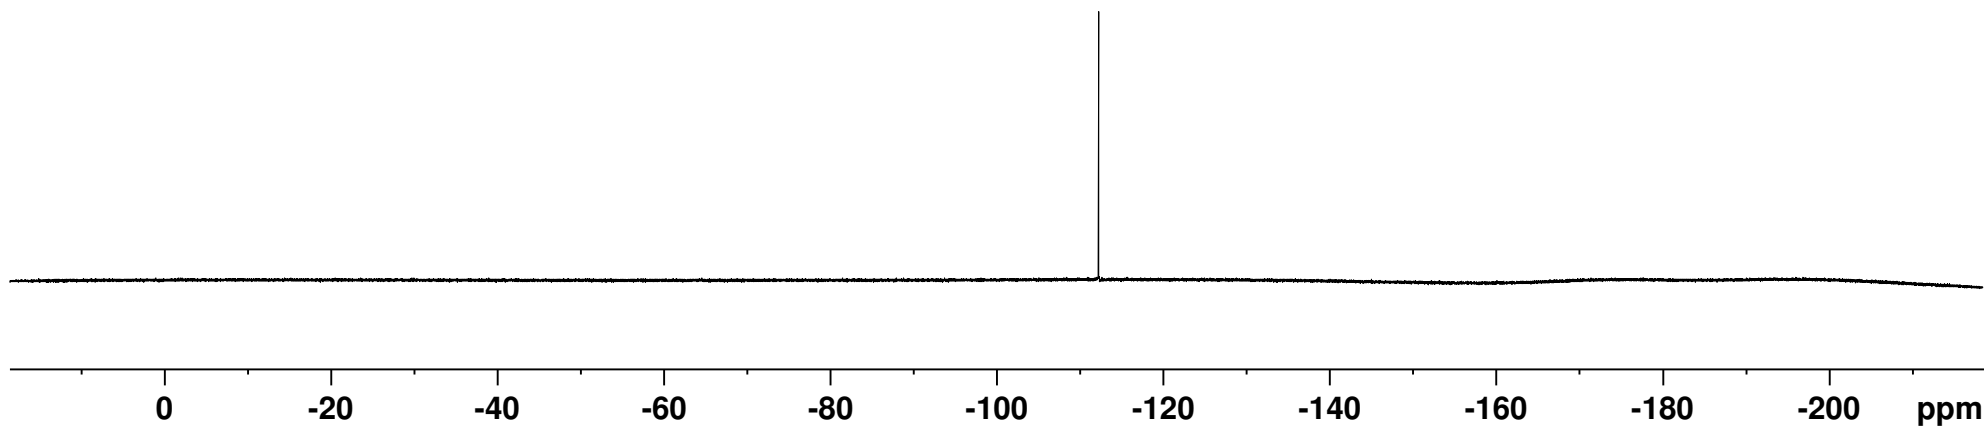



$^1\text{H}$  NMR (400 MHz,  $\text{CDCl}_3$ )

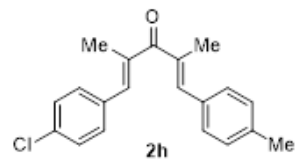

7.379  
7.371  
7.356  
7.352  
7.333  
7.244  
7.227  
7.207  
7.083  
7.080

2.376  
2.208  
2.205  
2.185  
2.182

0.088  
-0.000

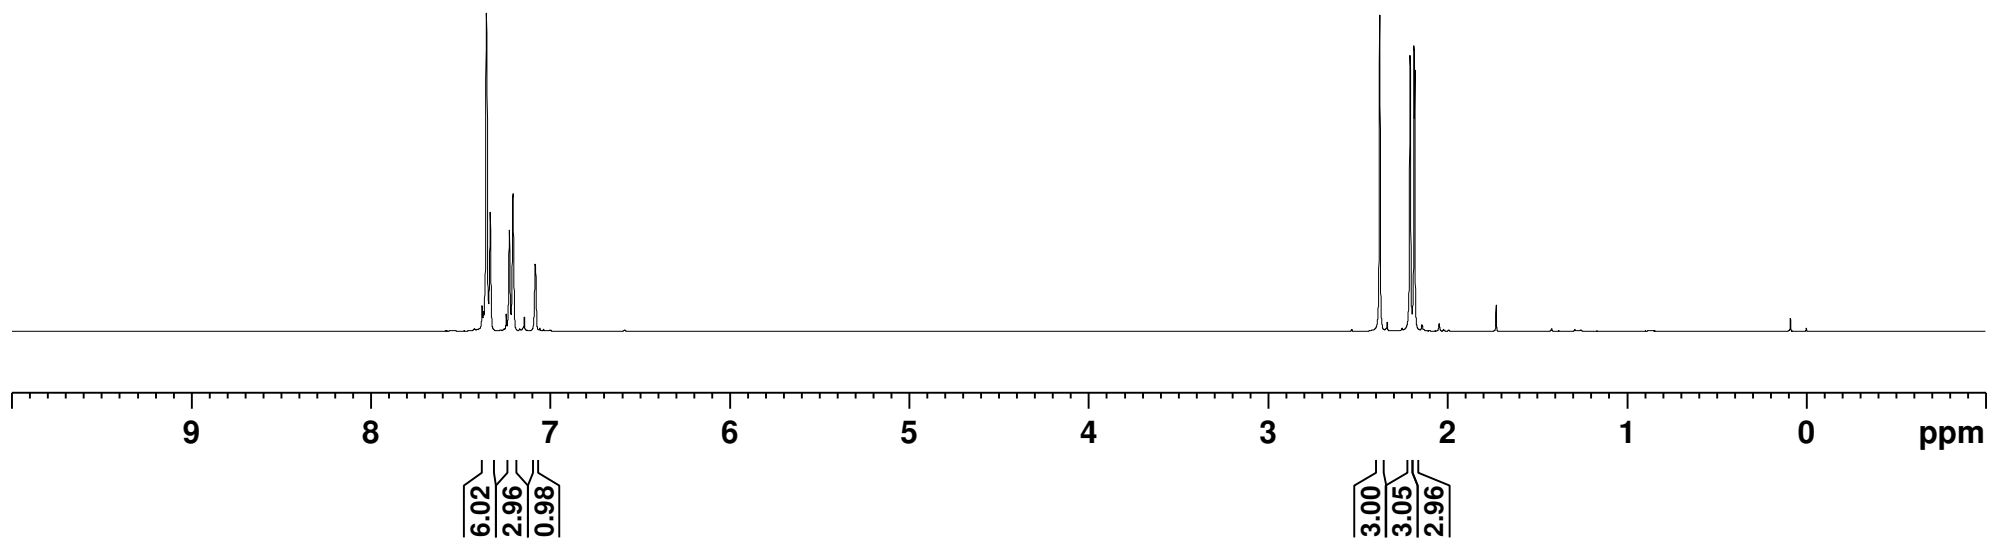

<sup>13</sup>C NMR (100 MHz, CDCl<sub>3</sub>)

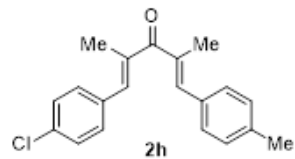

— 201.87

139.90  
138.72  
137.70  
136.89  
135.96  
134.52  
134.11  
133.07  
130.90  
129.83  
129.31  
128.75

77.48  
77.16  
76.84

21.44  
15.23  
14.88

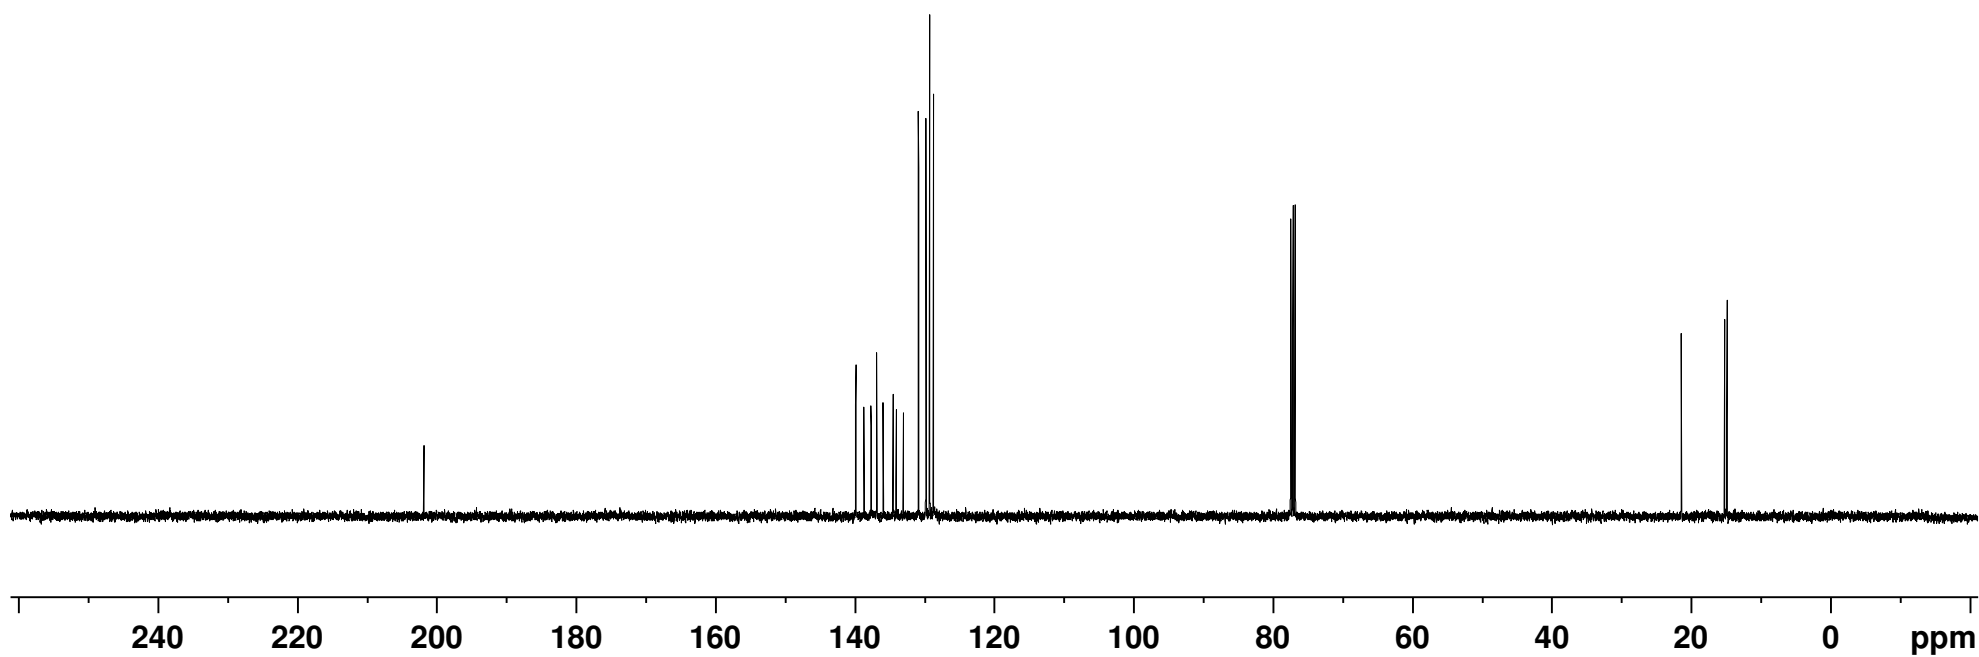

$^1\text{H}$  NMR (400 MHz,  $\text{CDCl}_3$ )

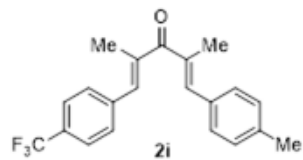

7.660  
7.639  
7.521  
7.500  
7.374  
7.354  
7.279  
7.239  
7.219  
7.106

2.381  
2.226  
2.224  
2.207  
2.205

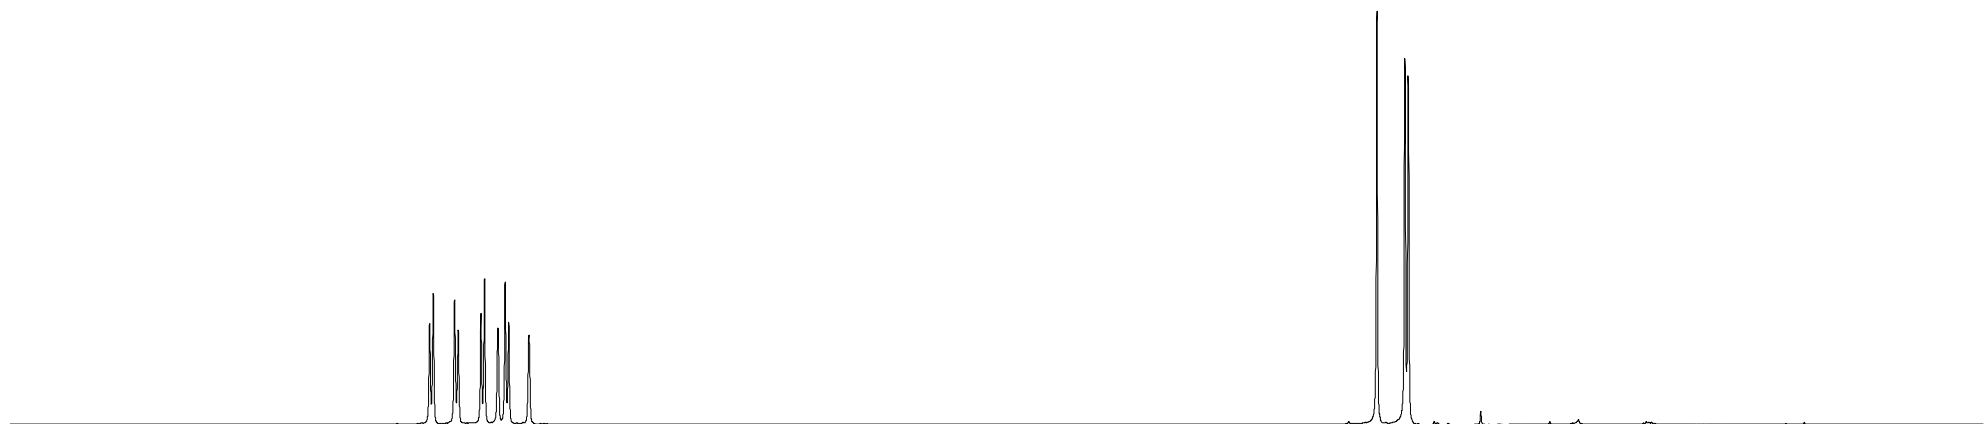

1.96  
2.00  
1.99  
1.01  
1.99  
0.97

3.00  
3.04  
2.89

<sup>13</sup>C NMR (100 MHz, CDCl<sub>3</sub>)

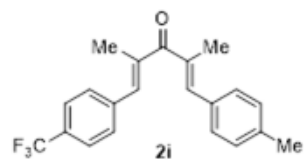

— 201.61

140.63  
139.67  
139.28  
138.91  
135.80  
132.96  
130.36  
130.03  
129.89  
129.70  
129.39  
129.34  
128.17  
125.47  
125.43  
125.40  
125.36  
122.76  
120.06

77.47  
77.16  
76.84

21.41  
15.36  
14.67

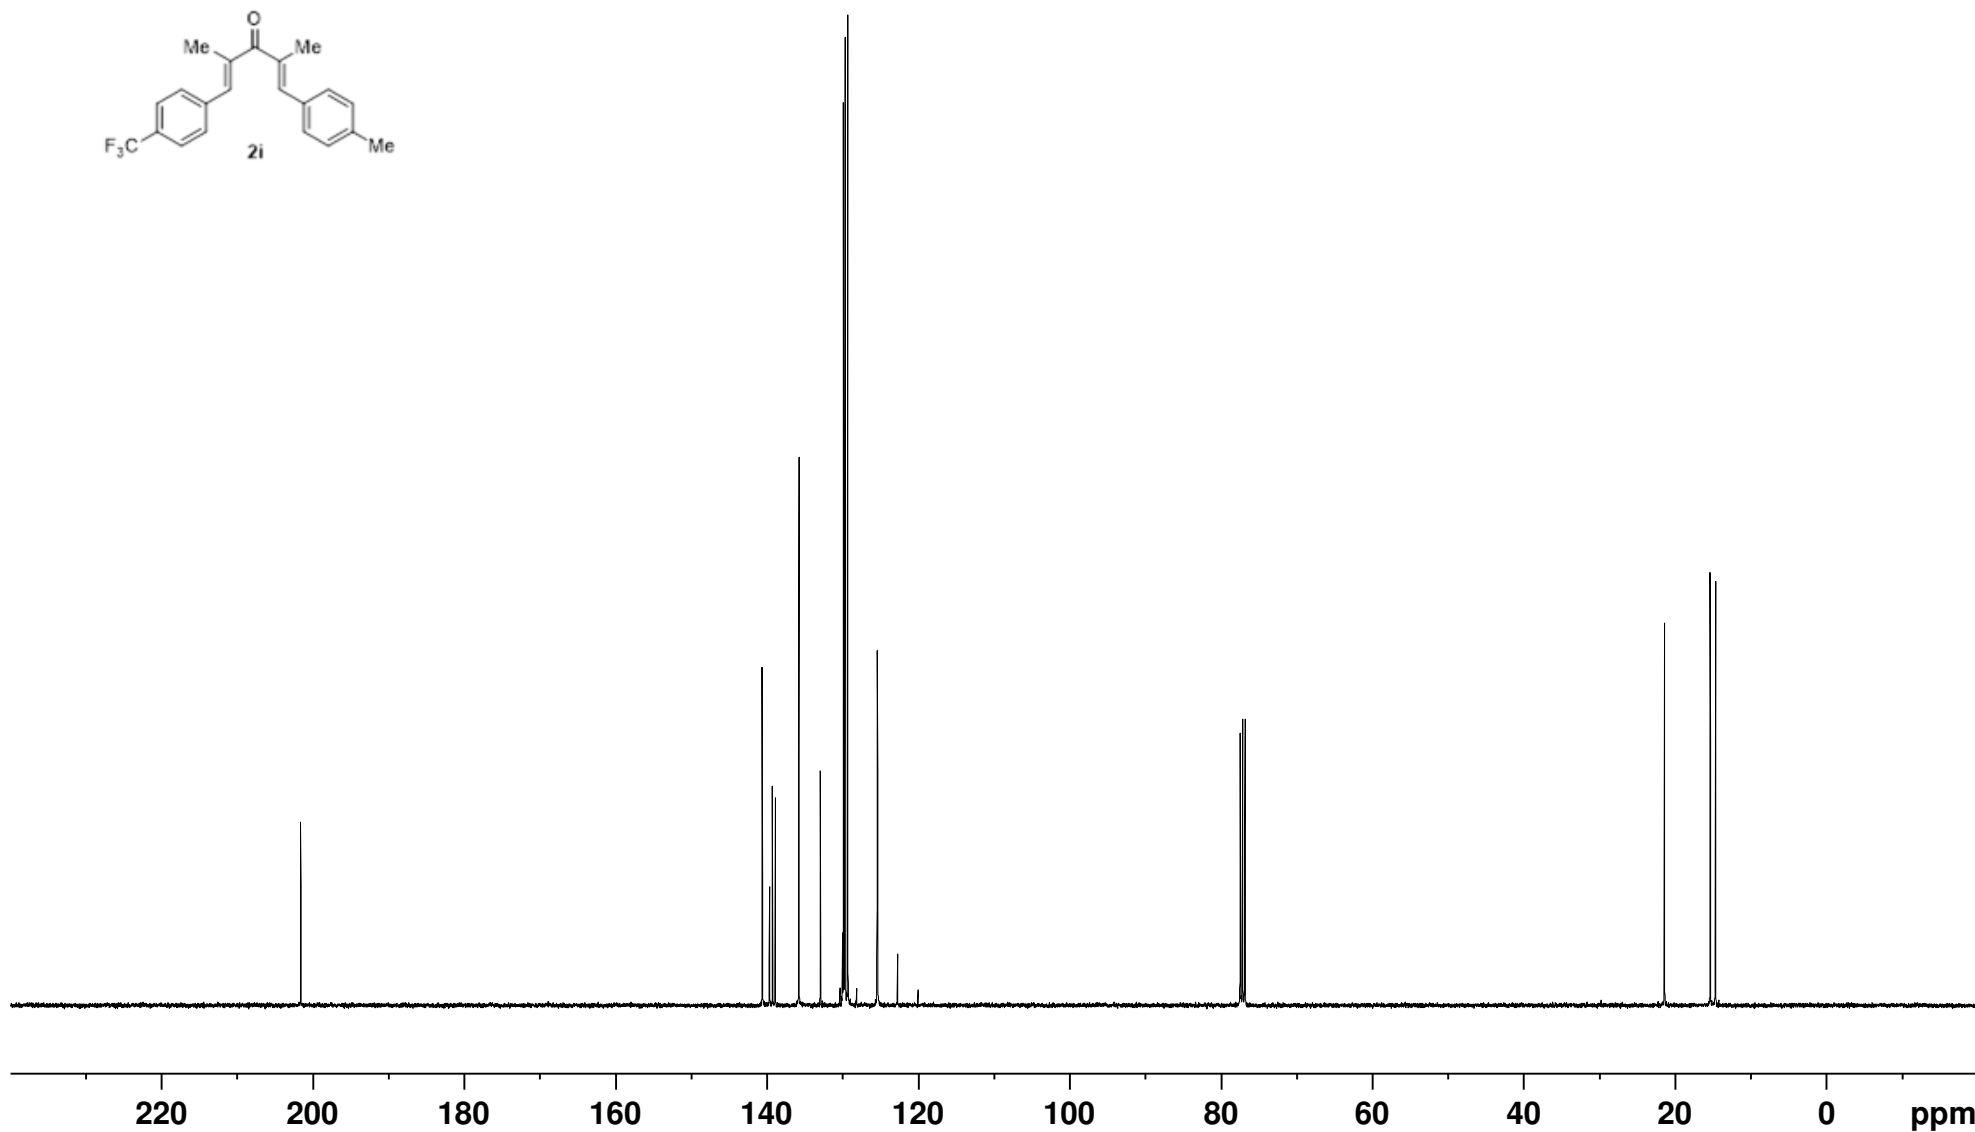

**$^{19}\text{F}$  NMR (376 MHz,  $\text{CDCl}_3$ )**

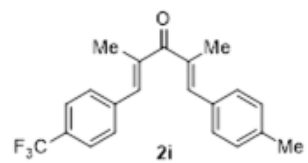

— -62.564

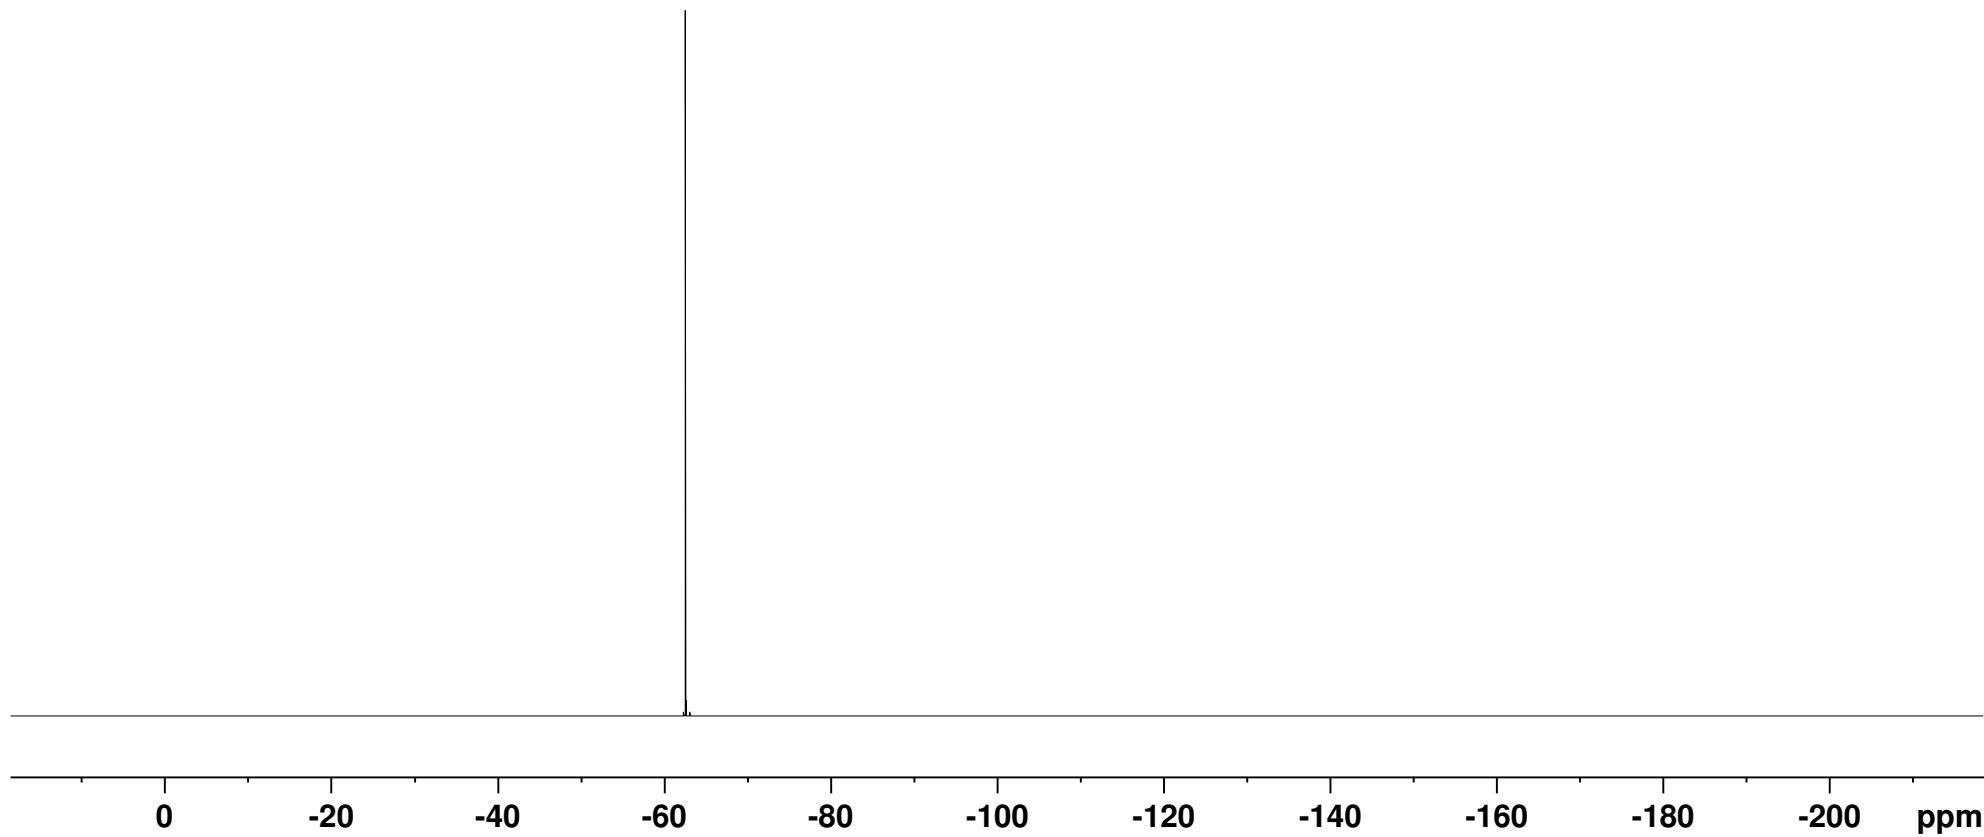

$^1\text{H}$  NMR (400 MHz,  $\text{CDCl}_3$ )

7.860  
7.857  
7.854  
7.845  
7.840  
7.836  
7.580  
7.577  
7.574  
7.564  
7.559  
7.553  
7.543  
7.540  
7.537  
7.493  
7.489  
7.477  
7.474  
7.460  
7.456  
7.453  
7.444  
7.426  
7.413  
7.389  
7.332  
7.329  
7.314  
7.297  
7.292  
7.274  
7.261  
7.258

2.129  
2.125

0.077  
-0.000

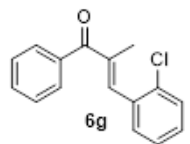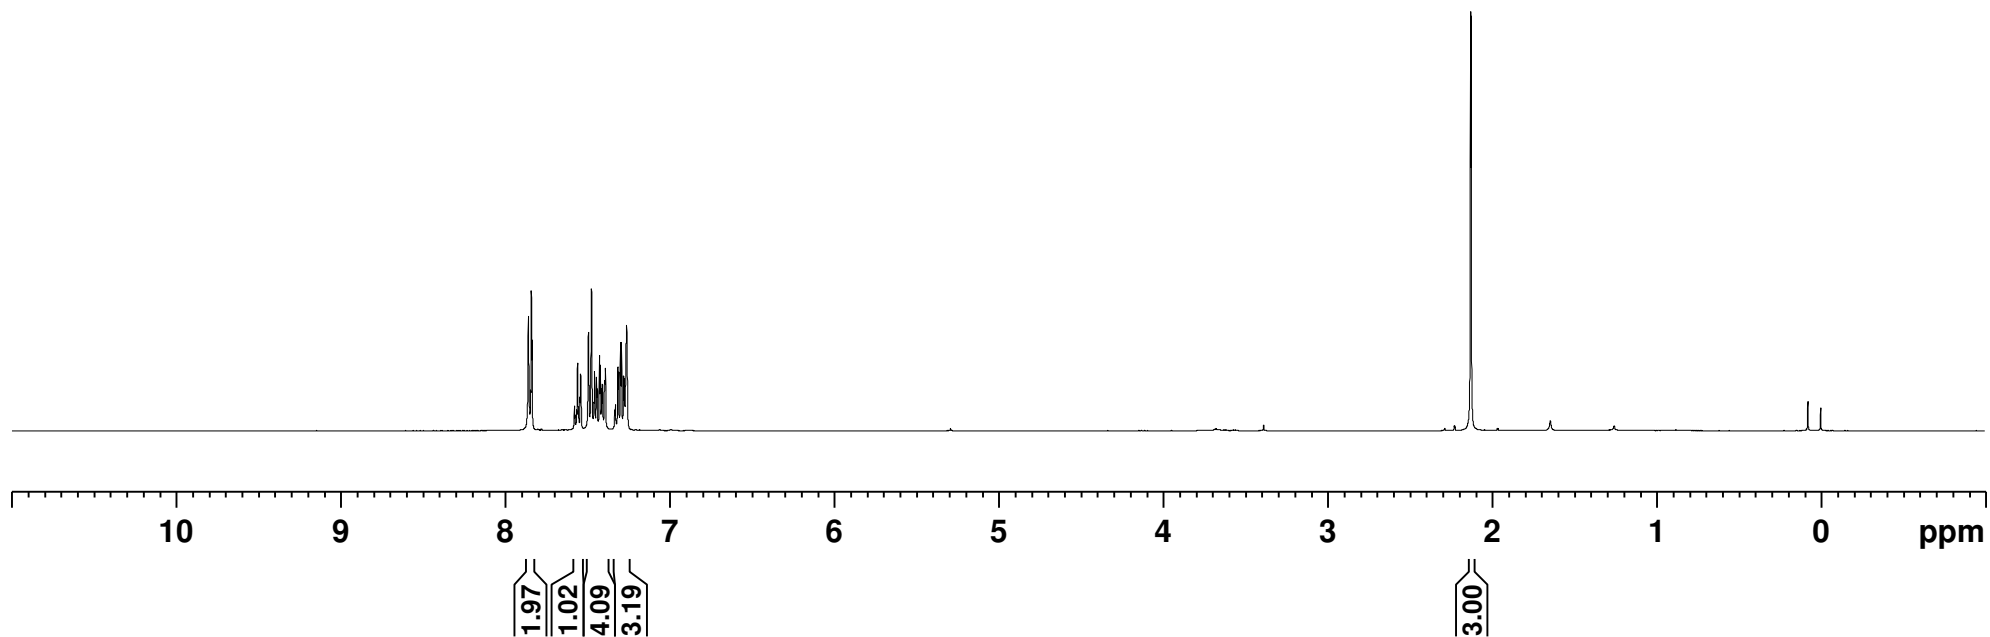

<sup>13</sup>C NMR (100 MHz, CDCl<sub>3</sub>)

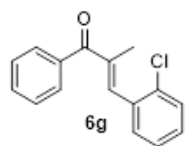

— 199.16

138.70  
138.41  
138.02  
134.50  
134.17  
132.16  
130.43  
129.81  
129.72  
129.66  
128.39  
126.65

77.48  
77.16  
76.84

— 14.41

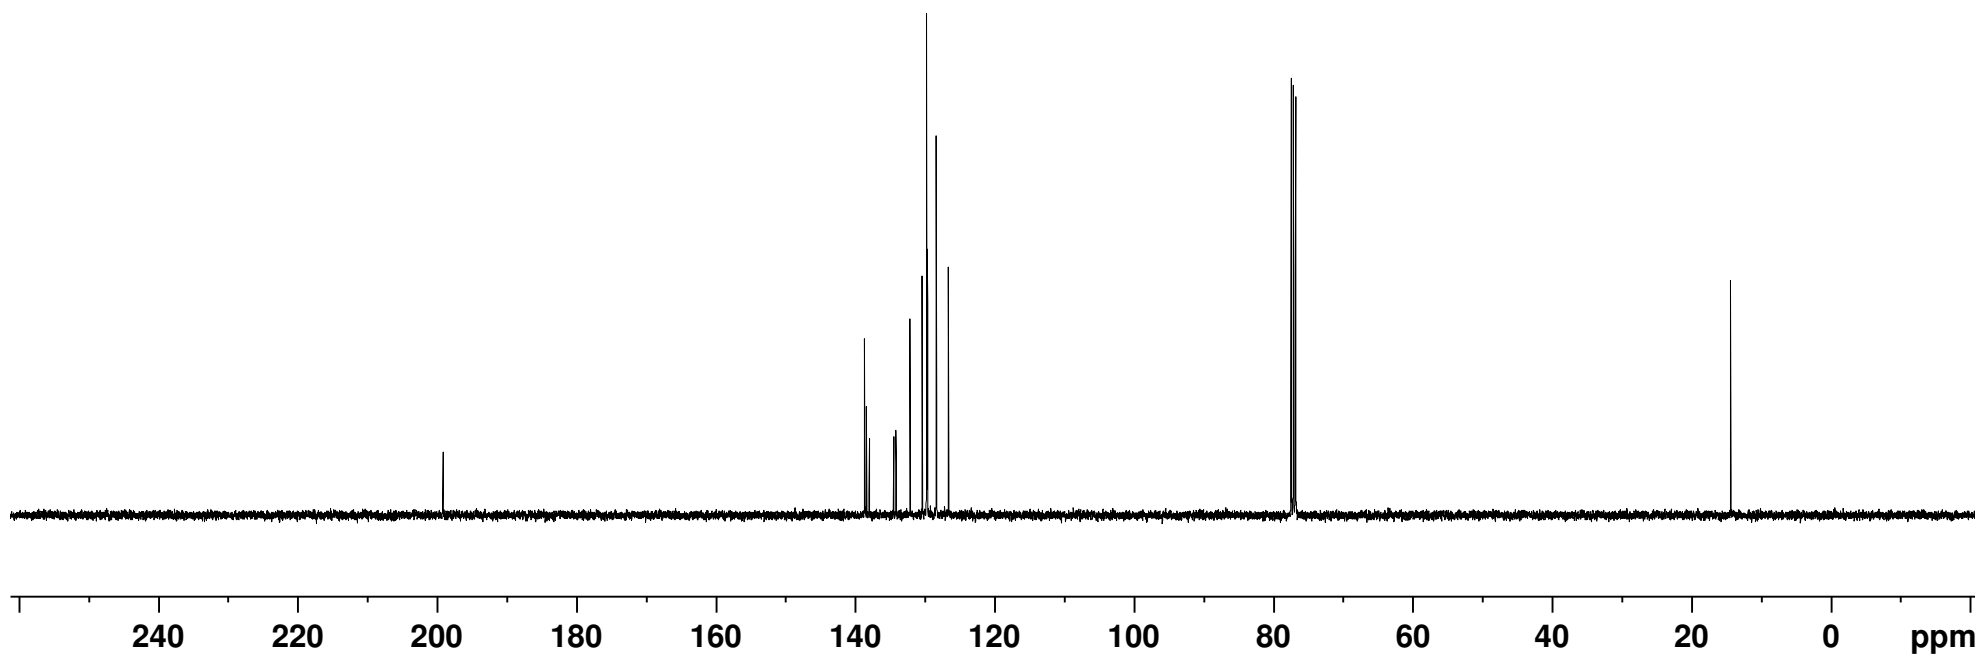

**<sup>1</sup>H NMR (400 MHz, CDCl<sub>3</sub>)**

7.742  
7.729  
7.724  
7.721  
7.567  
7.564  
7.561  
7.551  
7.545  
7.541  
7.530  
7.527  
7.524  
7.472  
7.466  
7.456  
7.454  
7.435  
7.262  
7.243  
7.238  
7.222  
7.217  
7.019

2.233  
2.230

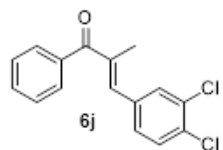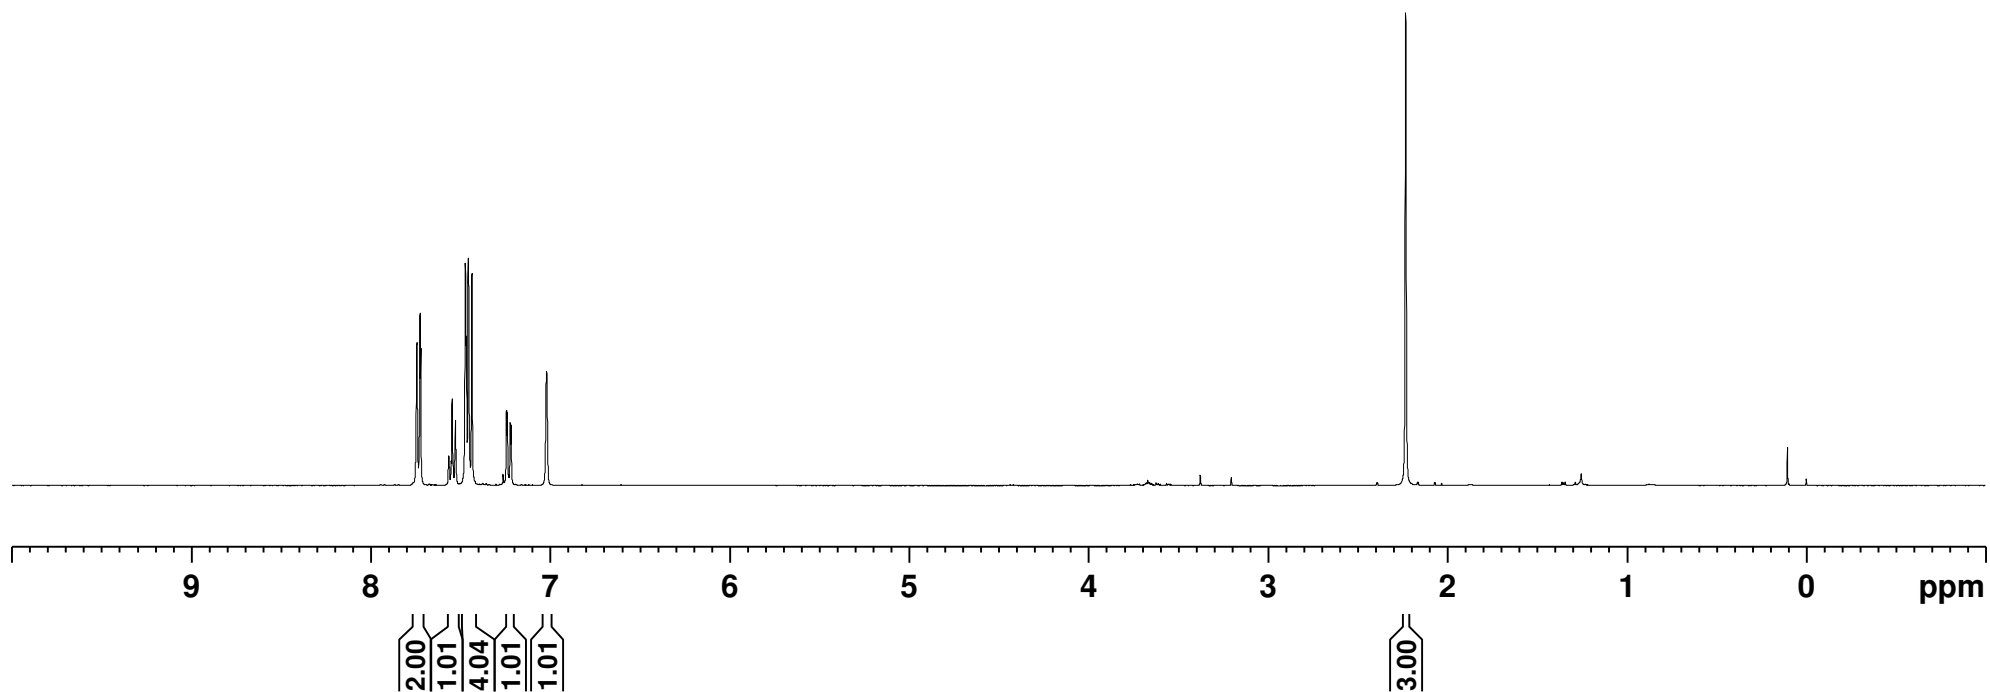



<sup>13</sup>C NMR (100 MHz, CDCl<sub>3</sub>)

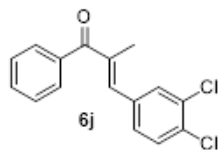

— 198.74

138.69  
138.52  
137.94  
135.78  
132.73  
132.51  
132.04  
131.27  
130.48  
129.51  
128.75  
128.37

77.48  
77.16  
76.84

— 14.60

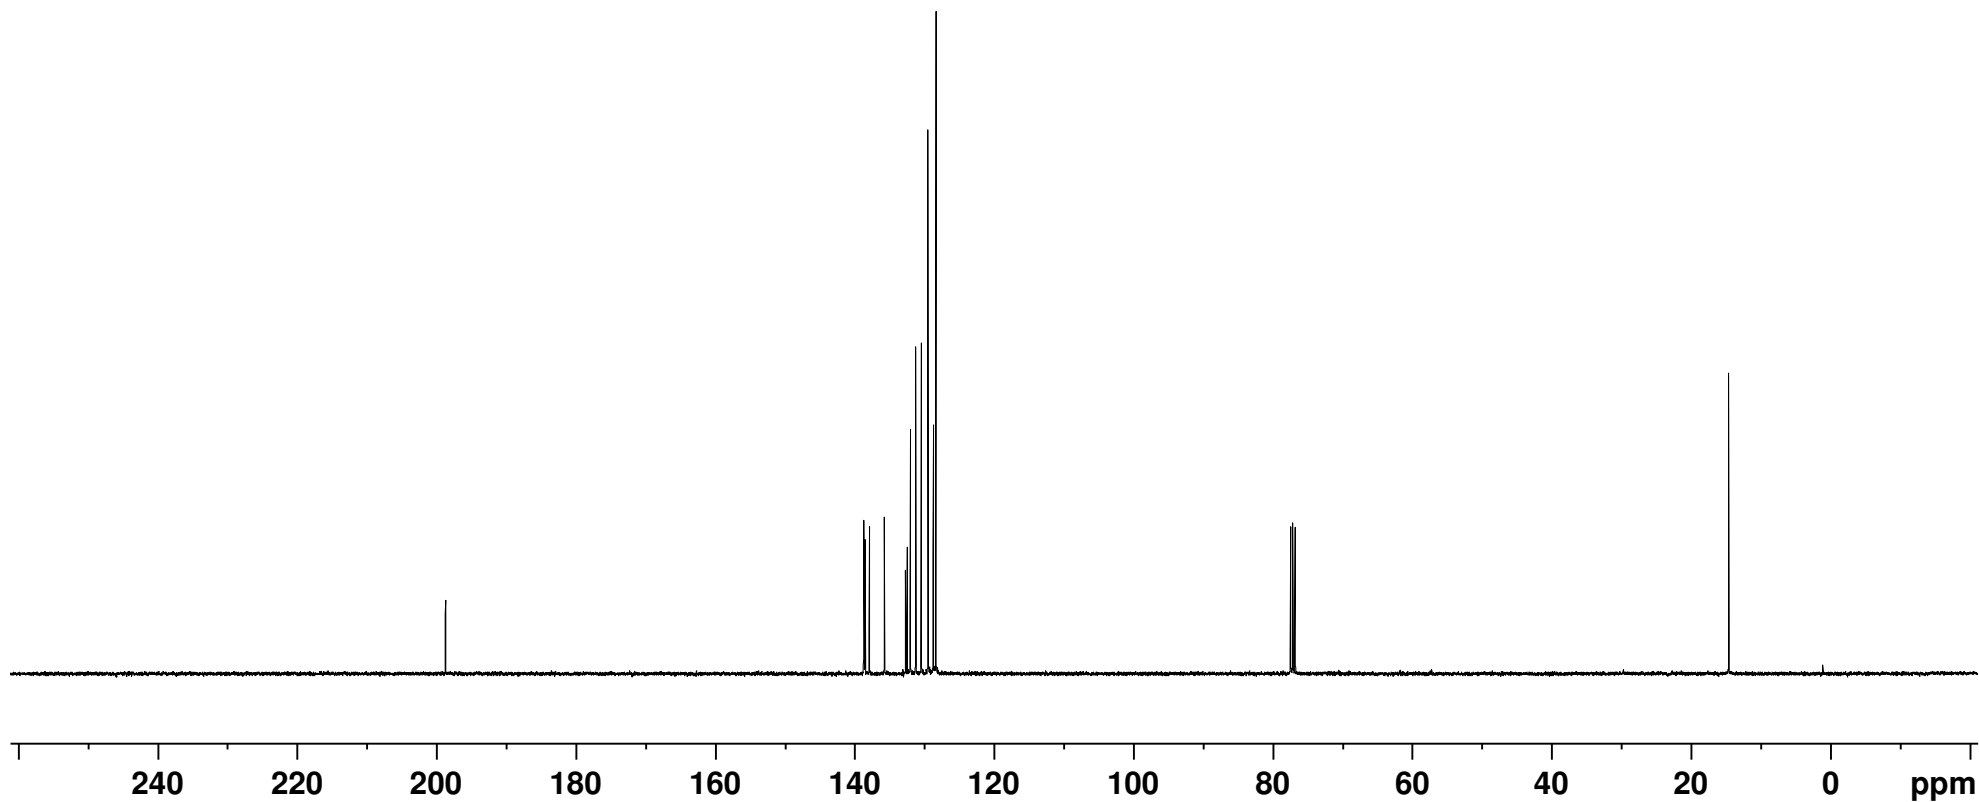

<sup>1</sup>H NMR (400 MHz, CDCl<sub>3</sub>)

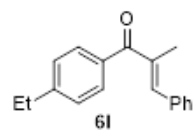

7.719  
7.698  
7.433  
7.427  
7.412  
7.407  
7.395  
7.390  
7.380  
7.375  
7.344  
7.338  
7.330  
7.322  
7.314  
7.312  
7.306  
7.301  
7.289  
7.269  
7.243  
7.170

2.746  
2.727  
2.707  
2.688  
2.266

1.294  
1.275  
1.256

0.003  
-0.000

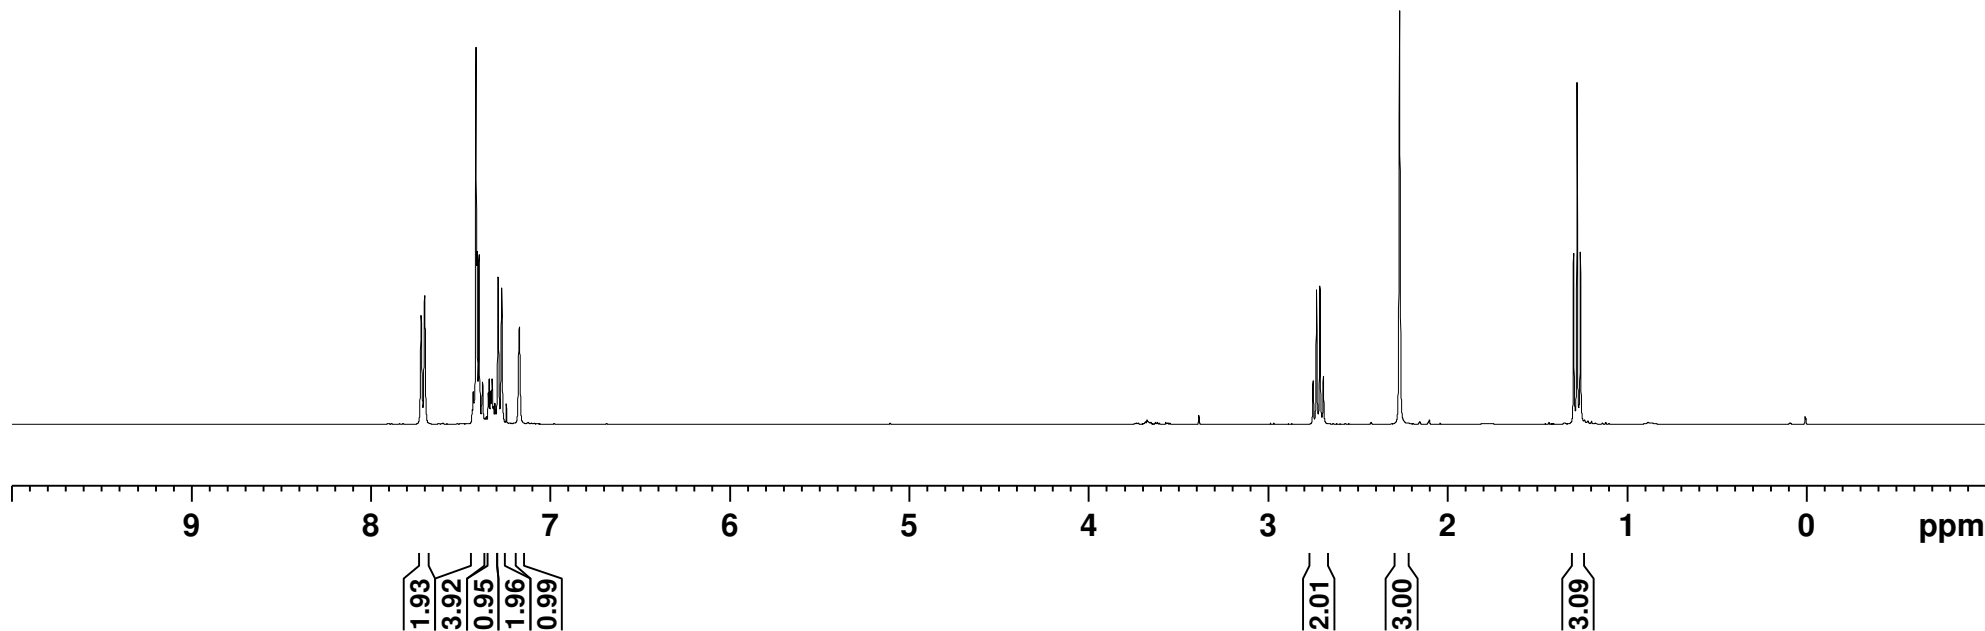

<sup>13</sup>C NMR (100 MHz, CDCl<sub>3</sub>)

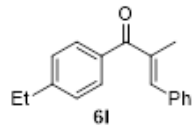

— 199.34

148.71  
141.40  
137.06  
136.03  
135.95  
129.97  
129.76  
128.55  
127.83

77.48  
77.16  
76.84

— 29.01

15.40  
14.72

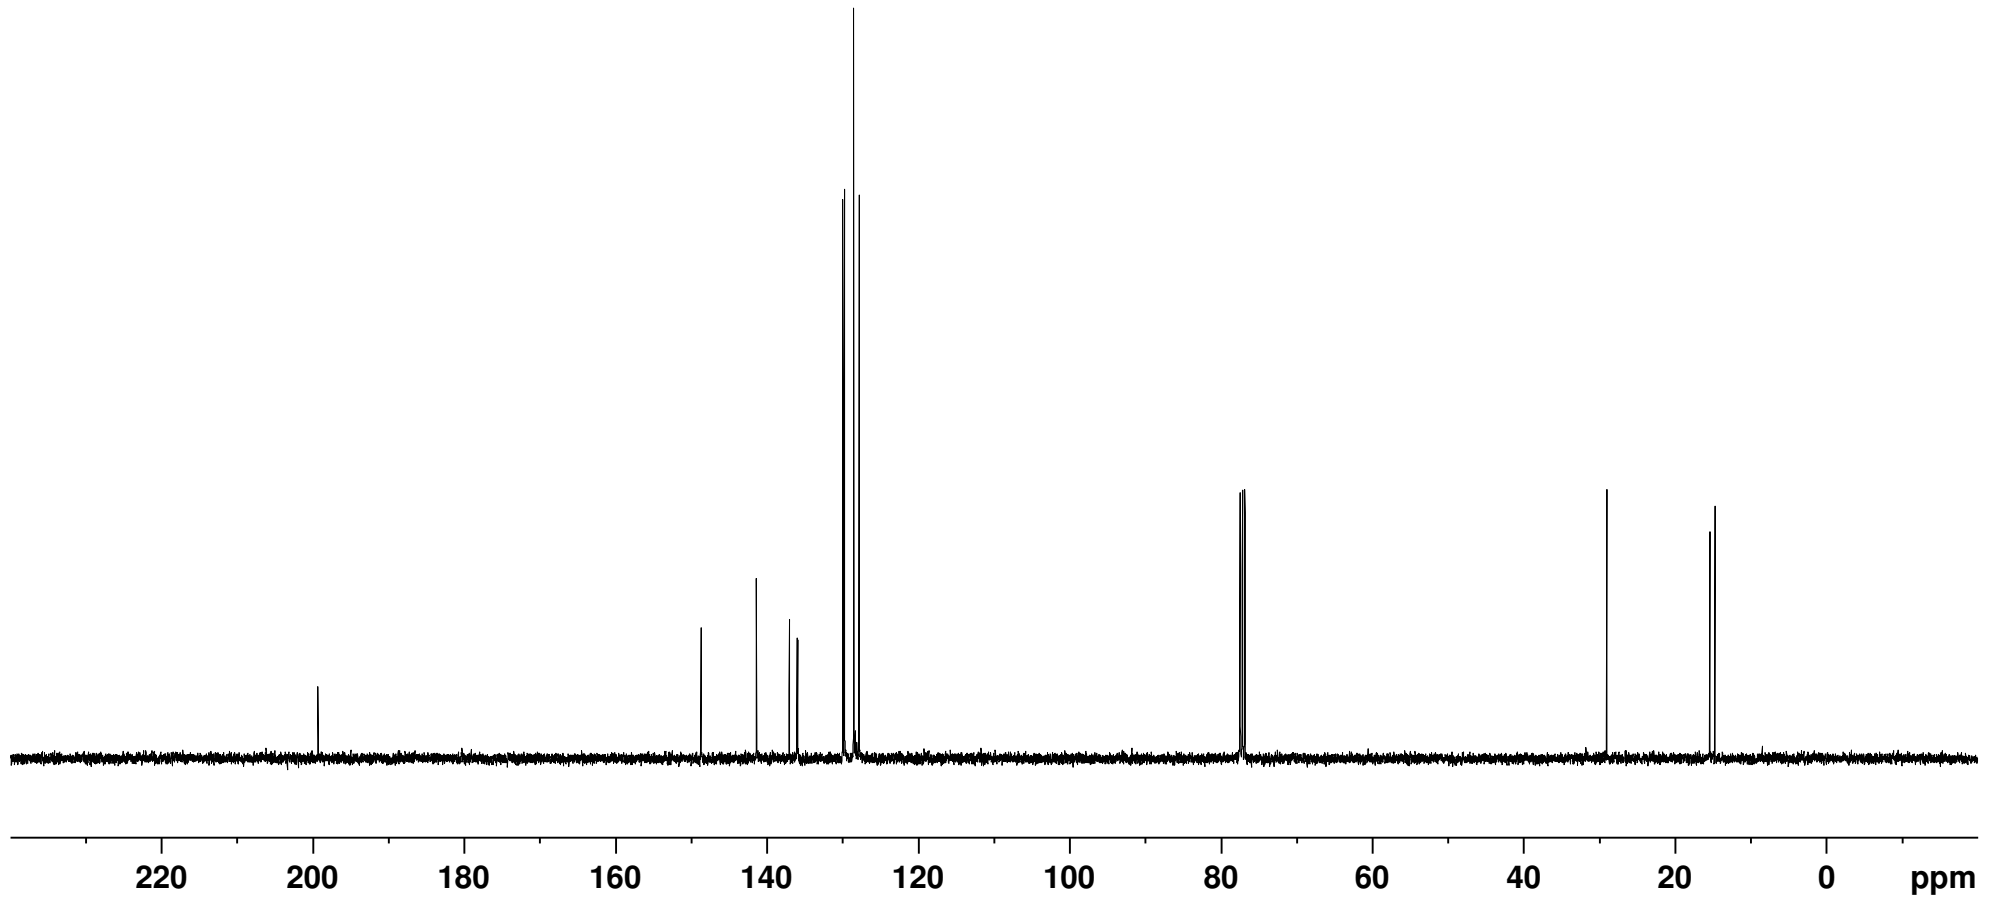

**<sup>1</sup>H NMR (400 MHz, CDCl<sub>3</sub>)**

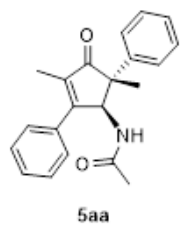

7.516  
7.500  
7.474  
7.467  
7.453  
7.436  
7.418  
7.353  
7.335  
7.315  
7.261  
7.237  
7.219  
5.971  
5.947  
5.395  
5.371

2.084  
1.923

1.452

-0.000

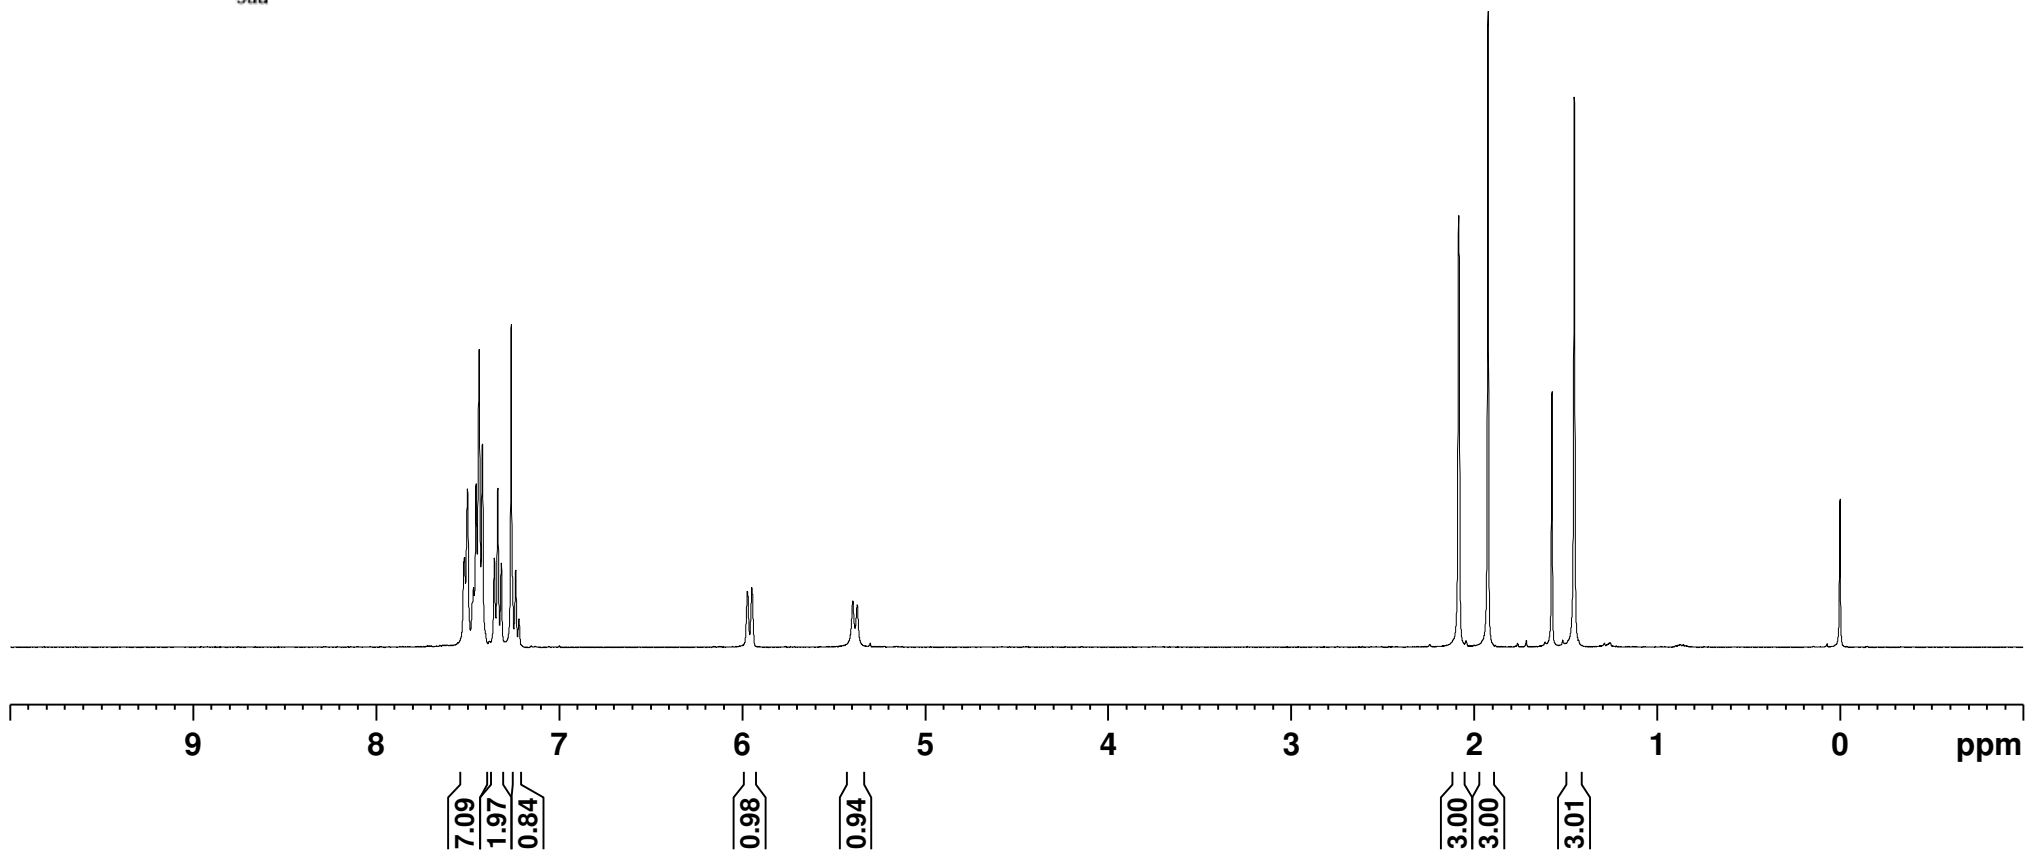

<sup>13</sup>C NMR (100 MHz, CDCl<sub>3</sub>)

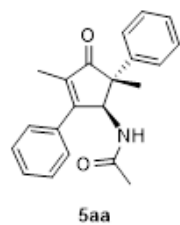

— 209.65

— 170.09

— 162.43

— 143.77

— 136.98

— 133.36

— 130.15

— 128.89

— 128.79

— 128.58

— 127.01

— 126.49

— 77.47

— 77.16

— 76.84

— 60.97

— 54.67

— 23.14

— 20.90

— 10.64

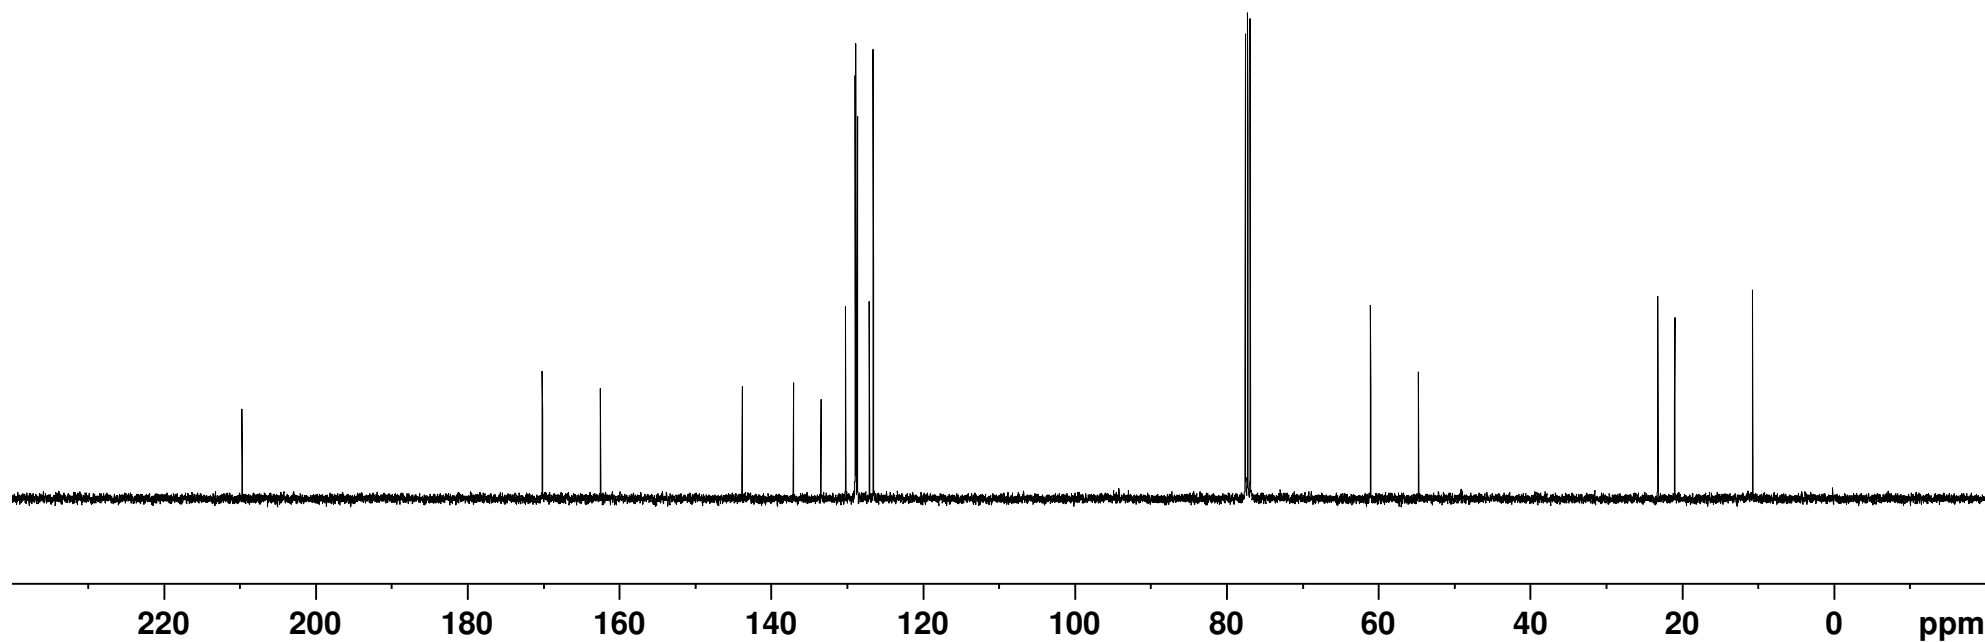

<sup>1</sup>H NMR (400 MHz, CDCl<sub>3</sub>)

7.526  
7.522  
7.506  
7.502  
7.477  
7.471  
7.466  
7.455  
7.436  
7.432  
7.428  
7.423  
7.415  
7.401  
7.397  
7.325  
7.308  
7.288  
7.264  
7.254  
7.241  
7.236  
7.230  
7.218  
7.152  
7.149  
7.131  
5.737  
5.732  
5.711  
5.706  
4.679  
4.654

2.130  
2.125  
1.775  
1.462

0.071  
-0.000

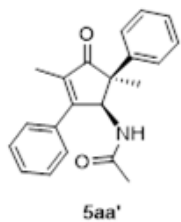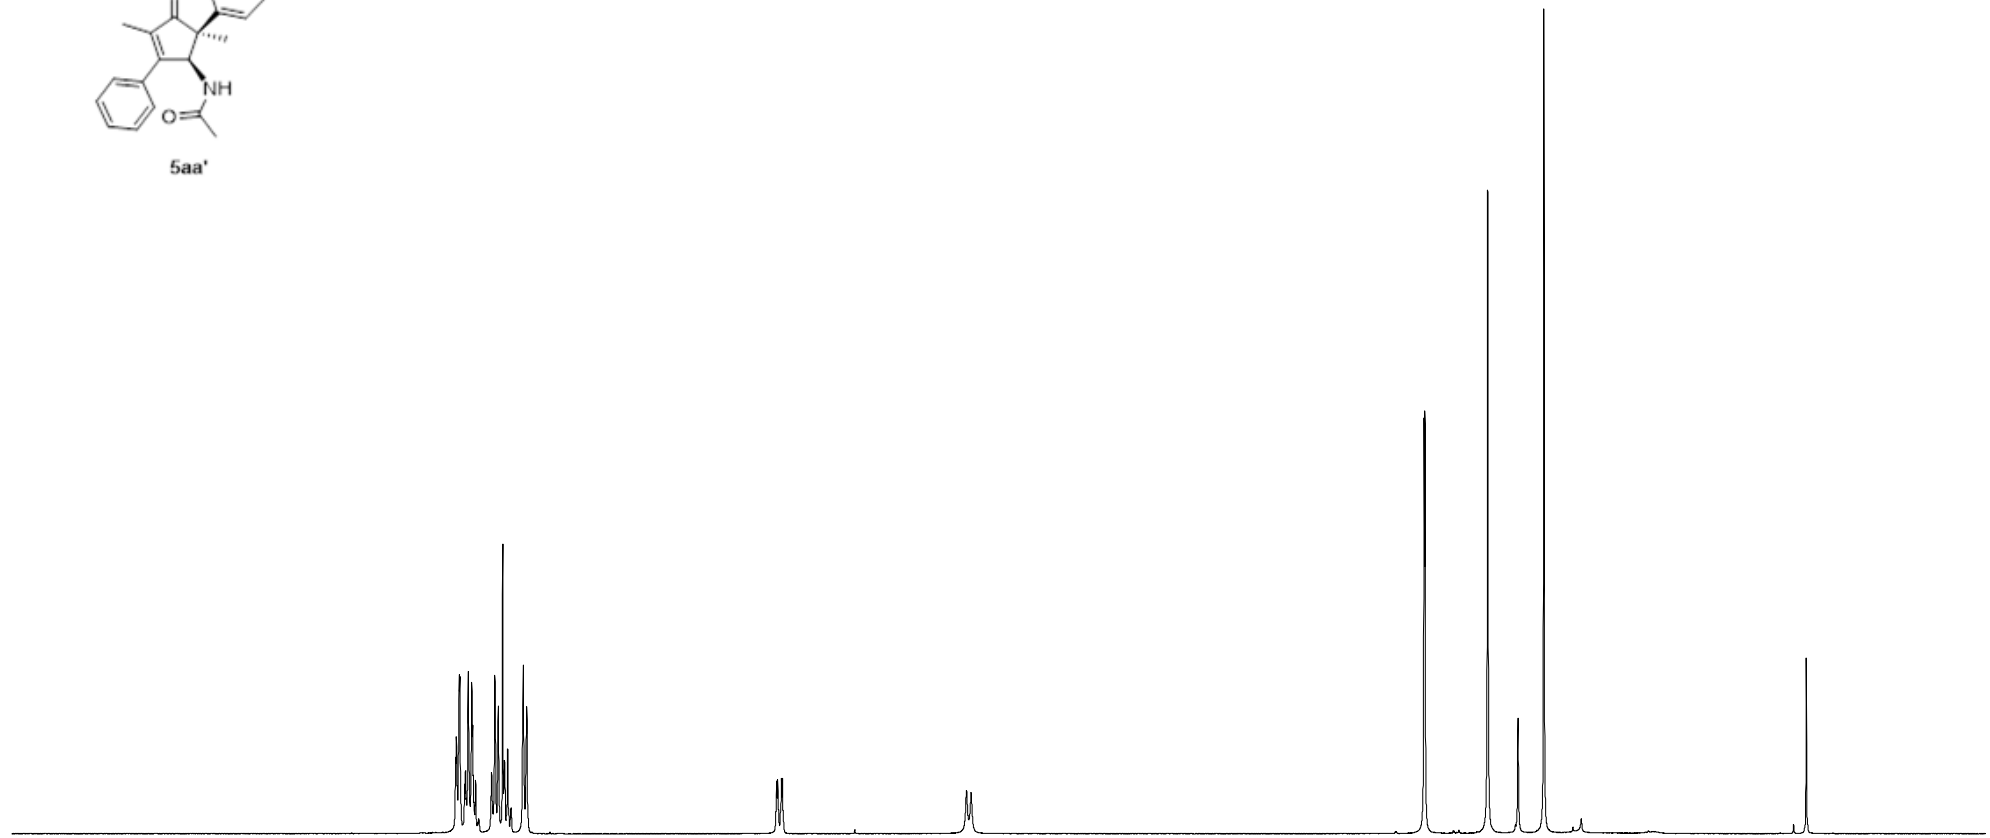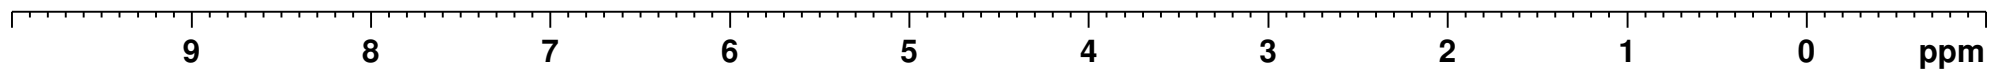

2.05  
3.17  
2.13  
1.04  
2.01

1.03

0.95

3.00  
2.98  
3.01

<sup>13</sup>C NMR (100 MHz, CDCl<sub>3</sub>)

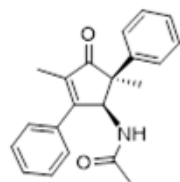

— 209.73

— 170.04

— 163.30

141.12

138.17

133.28

130.11

128.83

128.73

128.63

127.46

127.32

77.47

77.16

76.84

— 60.56

— 55.97

23.40

22.89

— 10.61

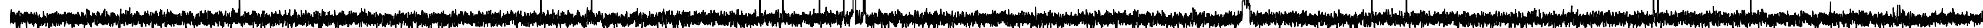

220 200 180 160 140 120 100 80 60 40 20 0 ppm

<sup>1</sup>H NMR (400 MHz, CDCl<sub>3</sub>)

7.509  
7.504  
7.489  
7.485  
7.479  
7.447  
7.434  
7.429  
7.419  
7.416  
7.406  
7.403  
7.390  
7.386  
7.346  
7.342  
7.328  
7.308  
7.262  
7.248  
7.229  
7.211  
5.981  
5.977  
5.957  
5.952  
5.478  
5.454

2.147  
2.128  
2.110  
2.092  
2.073  
2.069  
2.059  
2.041  
2.023  
2.005  
1.986  
1.572  
1.553  
1.535  
1.516  
1.498  
1.480  
1.437  
0.804  
0.786  
0.767  
0.073  
-0.000

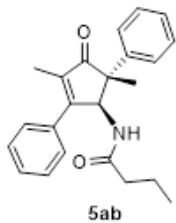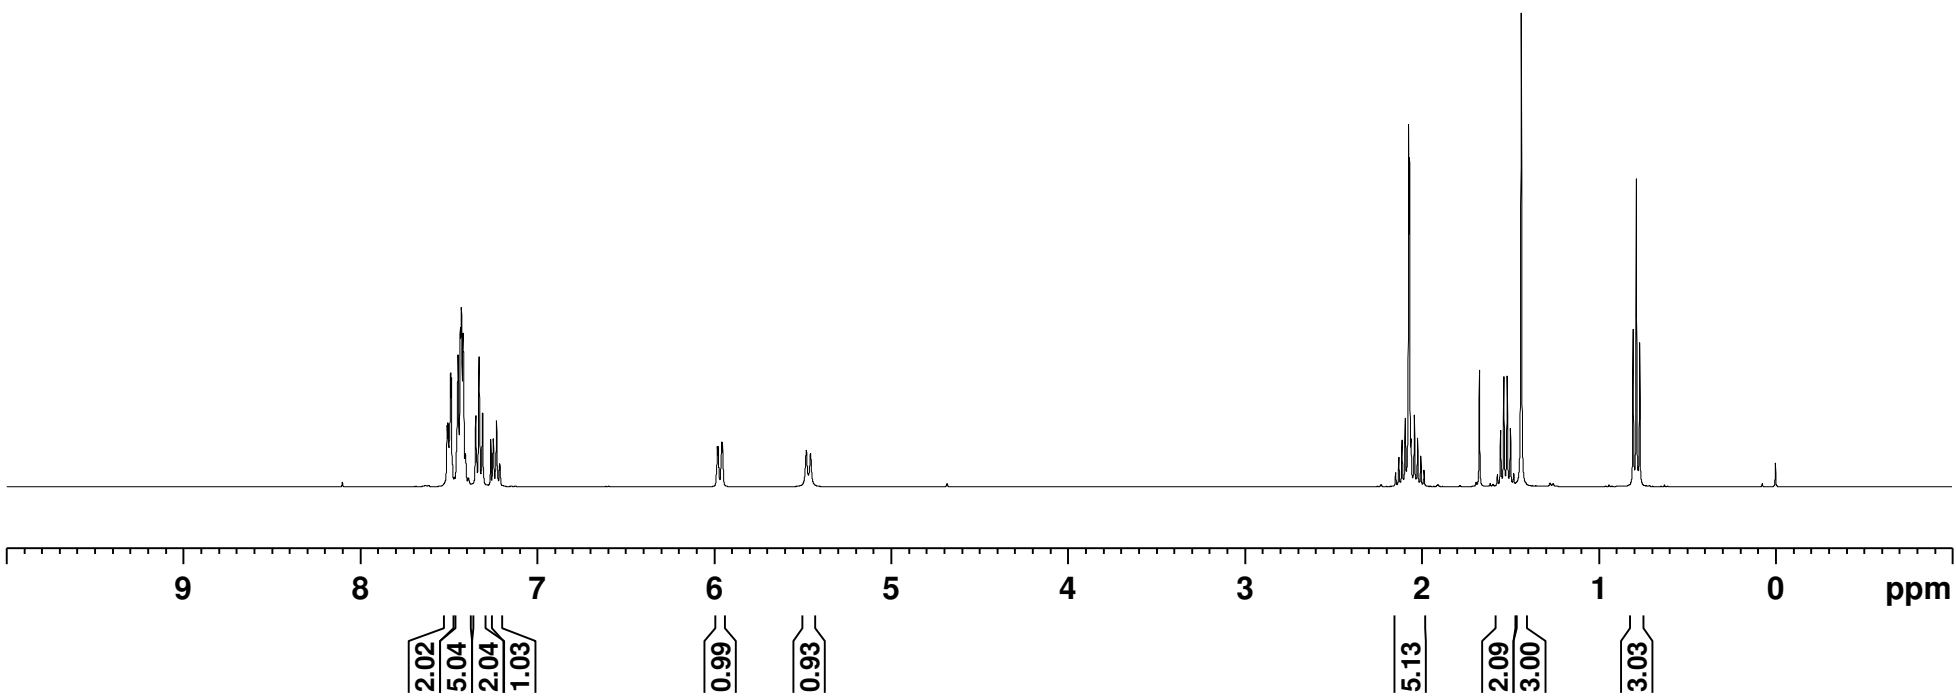



$^{13}\text{C}$  NMR (100 MHz,  $\text{CDCl}_3$ )

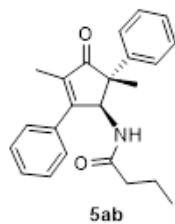

- 209.69
- 173.00
- 162.50
- 143.84
- 136.96
- 133.35
- 130.15
- 128.87
- 128.80
- 128.64
- 127.00
- 126.55
- 77.48
- 77.16
- 76.84
- 60.83
- 54.64
- 38.60
- 21.11
- 19.20
- 13.66
- 10.64

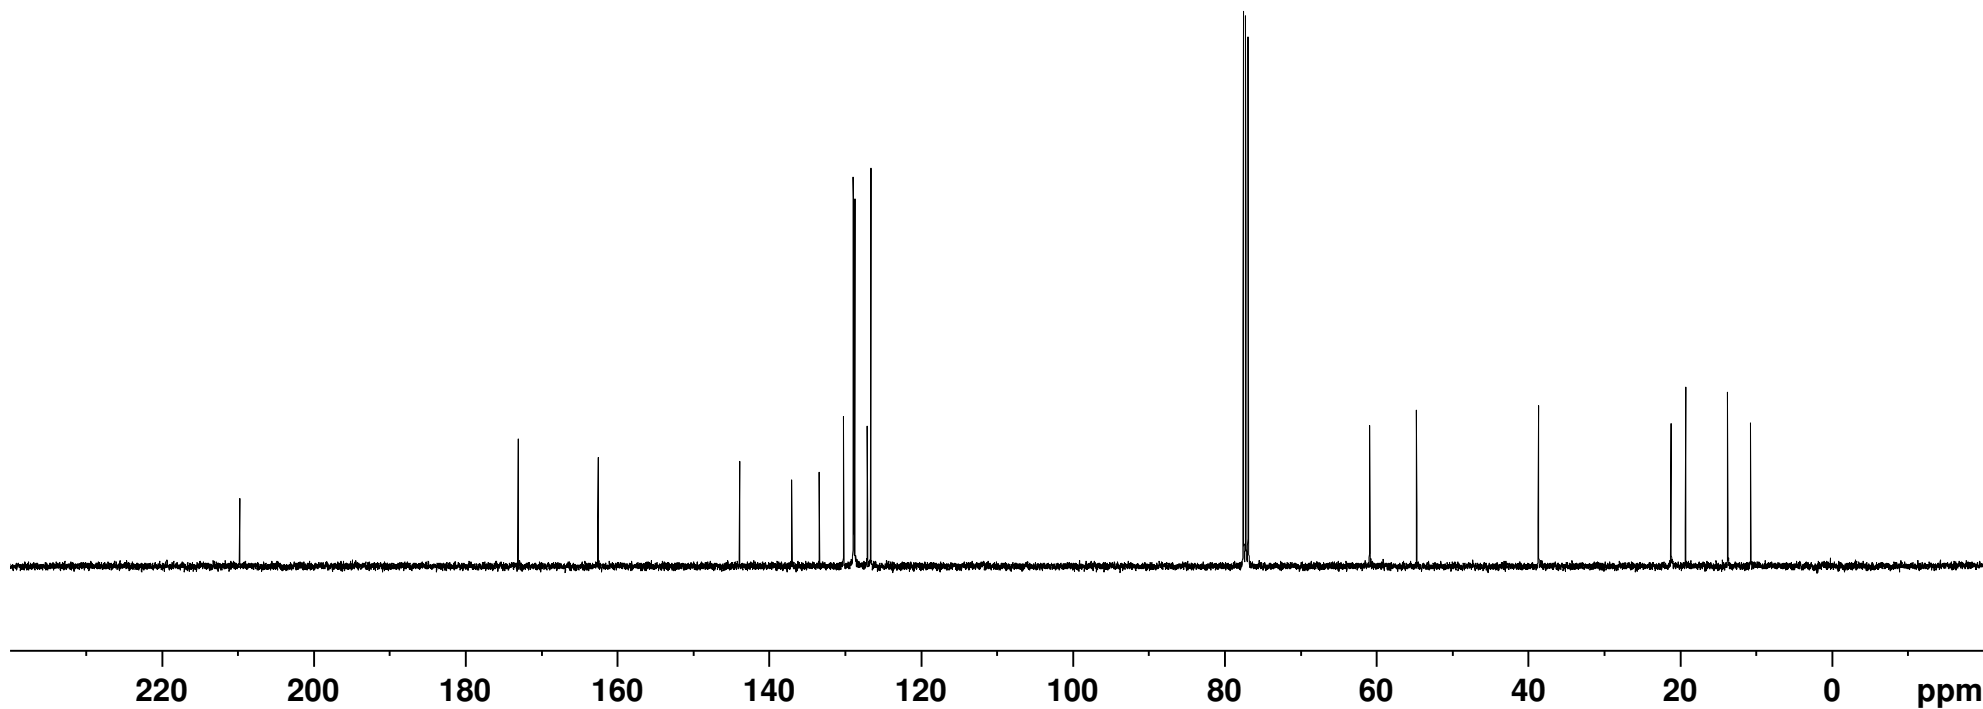

**<sup>1</sup>H NMR (400 MHz, CDCl<sub>3</sub>)**

7.522  
7.518  
7.502  
7.499  
7.465  
7.460  
7.420  
7.403  
7.393  
7.385  
7.313  
7.296  
7.276  
7.262  
7.244  
7.230  
7.226  
7.220  
7.207  
7.149  
7.145  
7.127  
5.748  
5.743  
5.723  
5.718  
5.713  
4.682  
4.656

2.126  
2.121  
1.775  
1.632  
1.626  
1.613  
1.608  
1.594  
1.590  
1.234  
1.230  
1.215  
1.141  
1.137  
0.624  
0.606  
0.587  
0.070  
-0.000

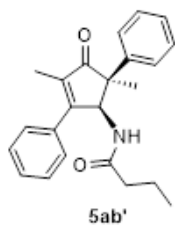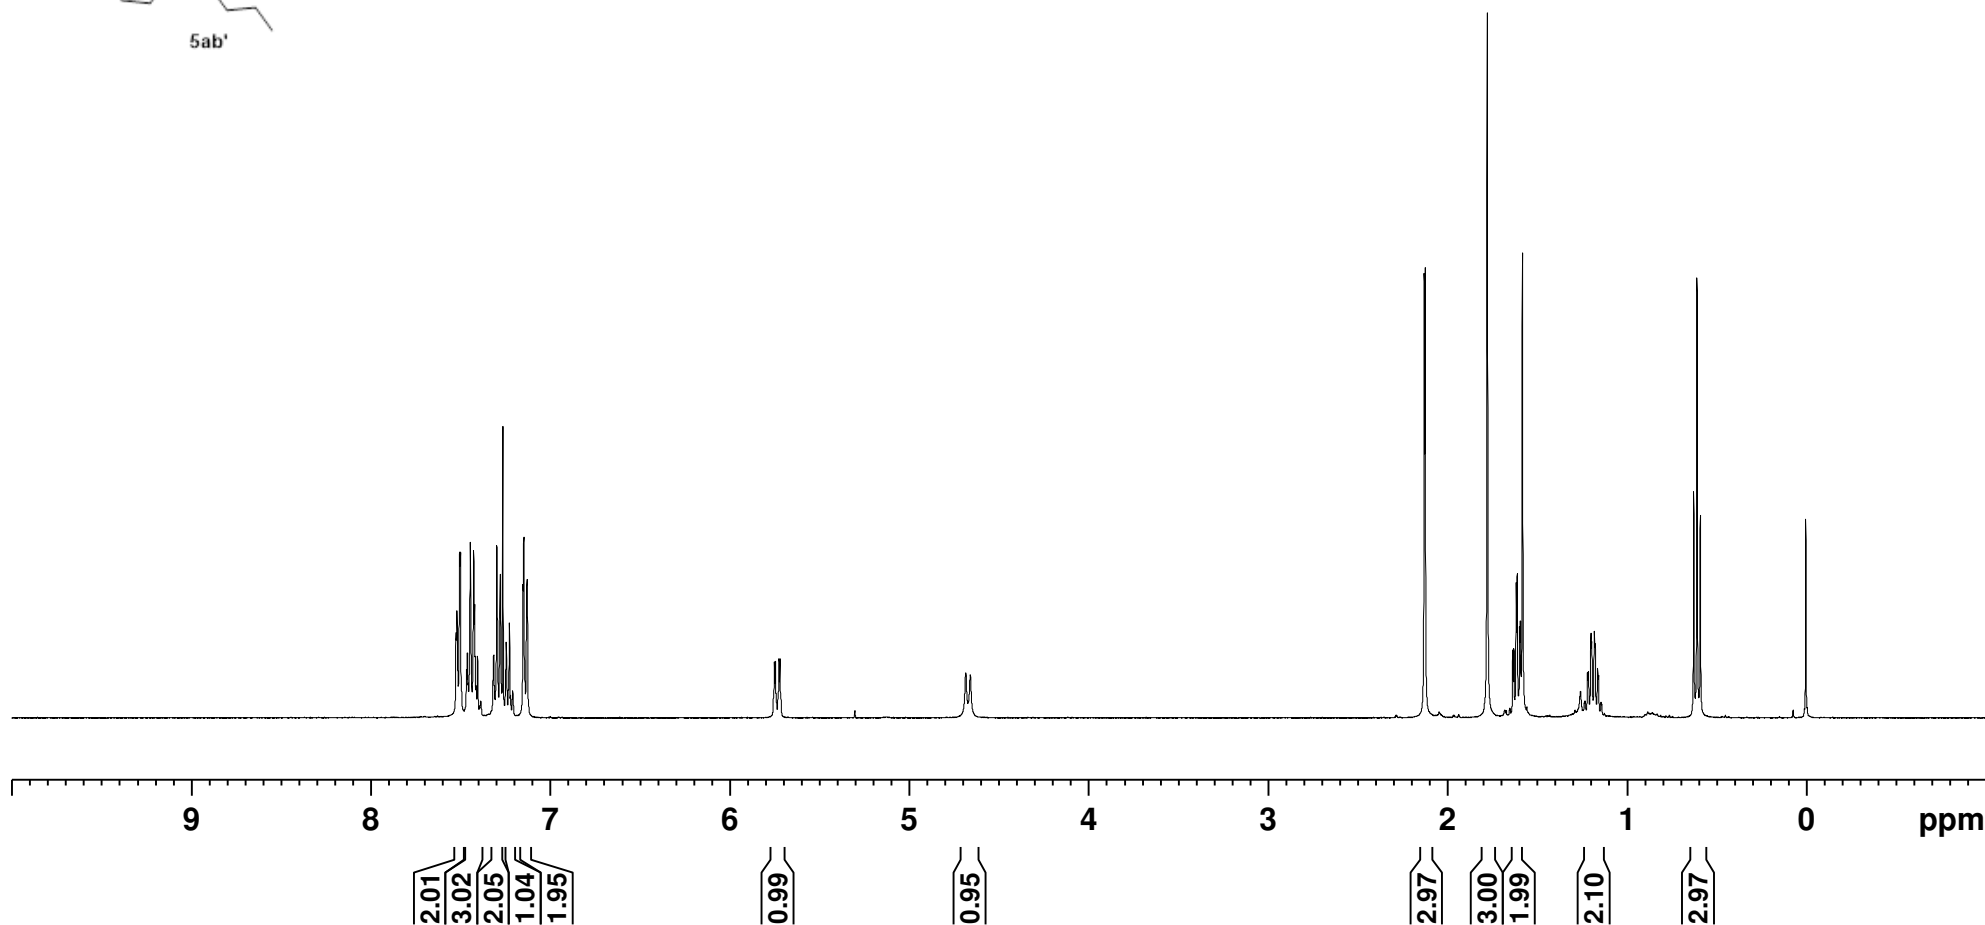

<sup>13</sup>C NMR (150 MHz, CDCl<sub>3</sub>)

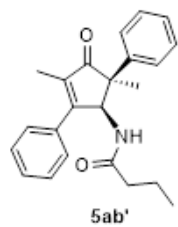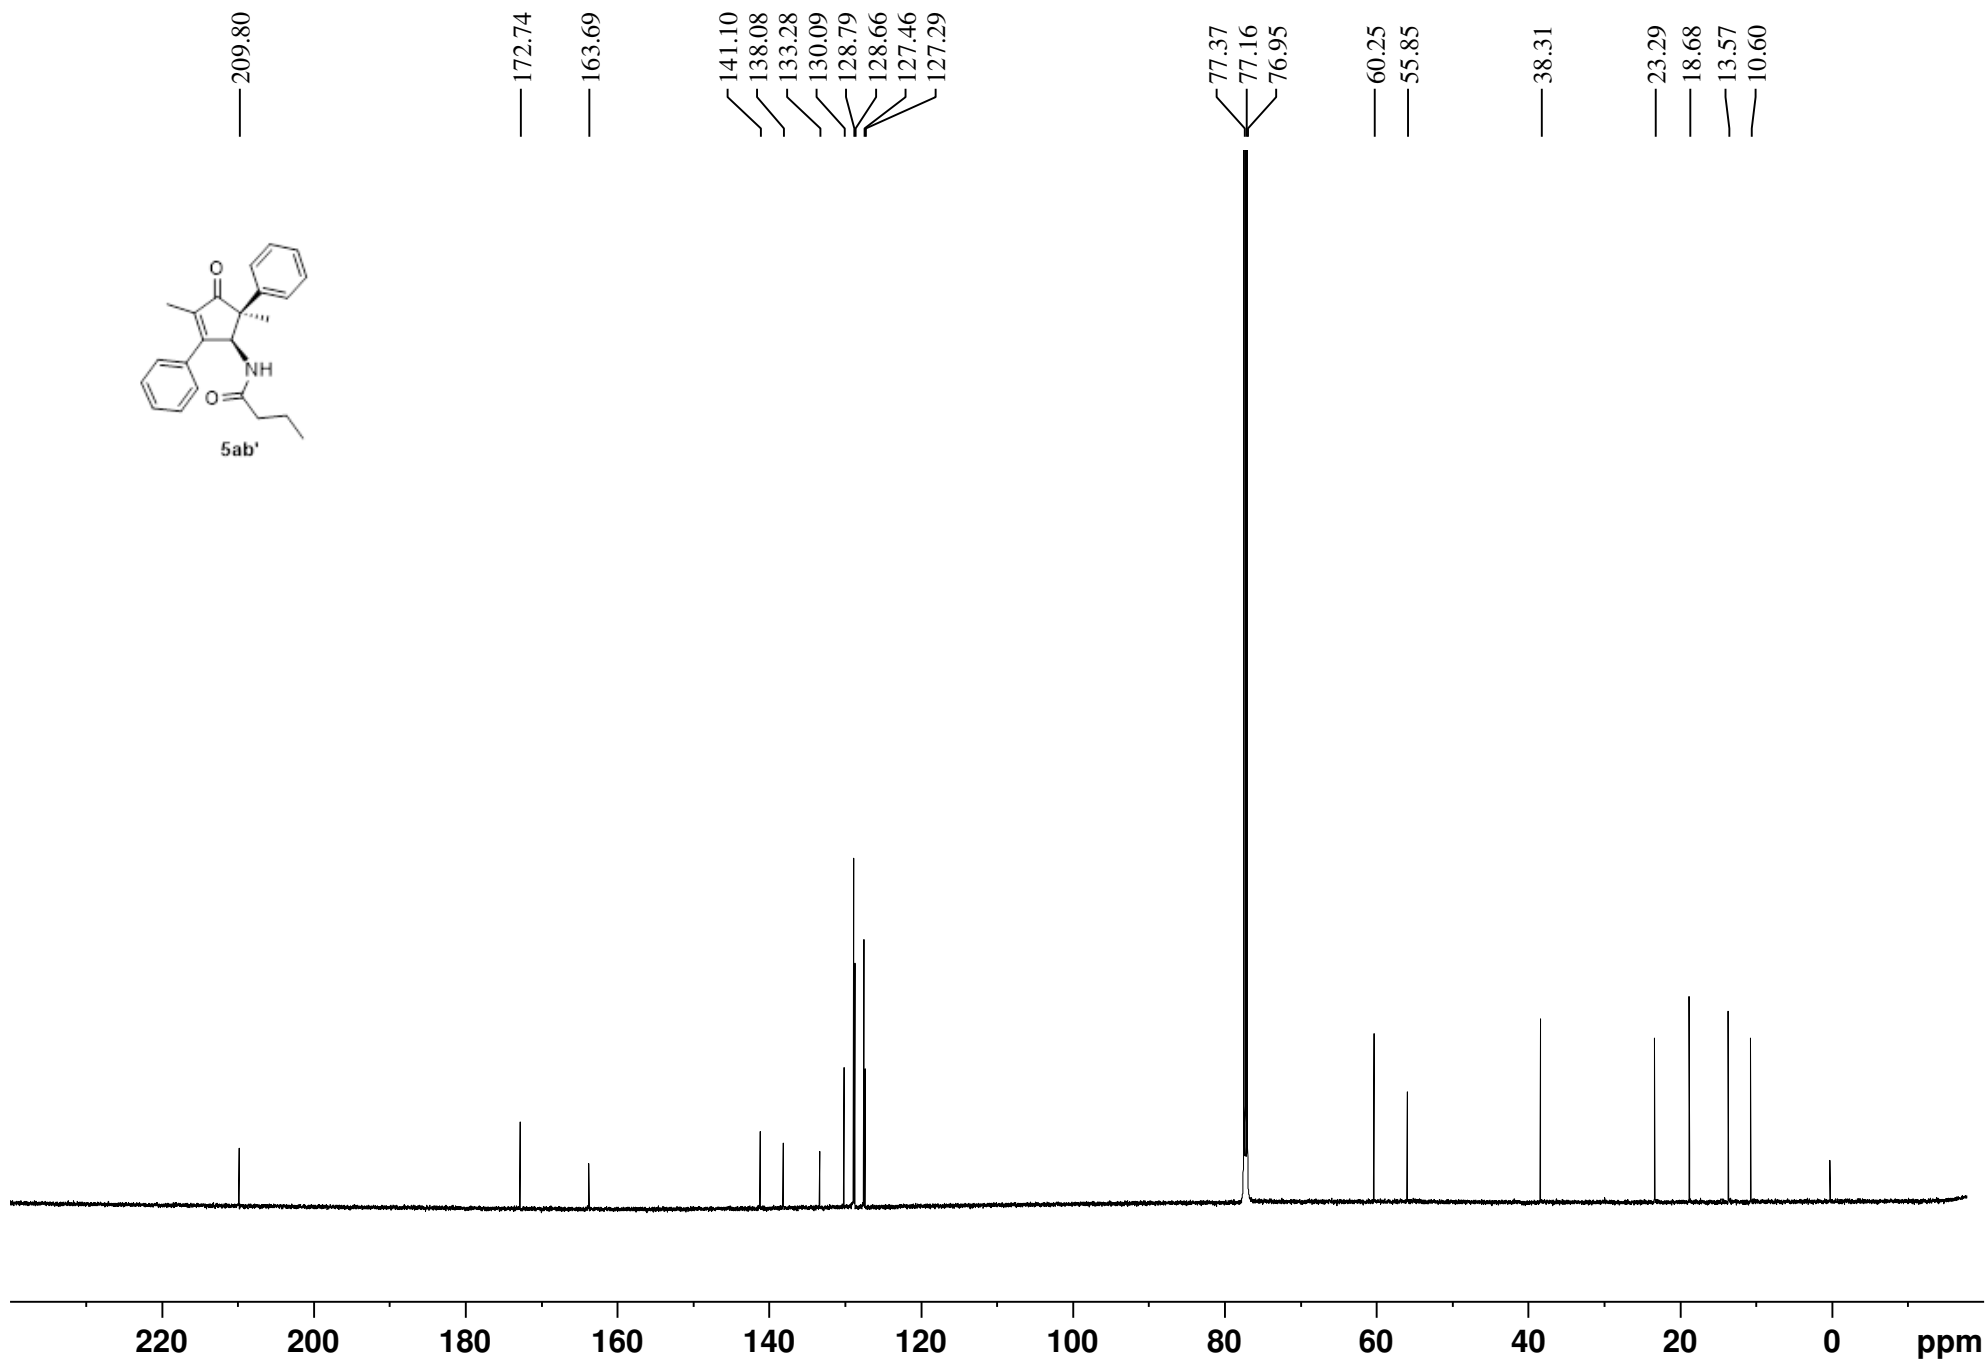

**<sup>1</sup>H NMR (400 MHz, CDCl<sub>3</sub>)**

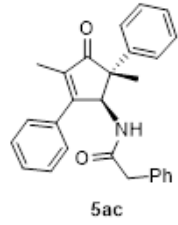

7.426  
7.420  
7.415  
7.364  
7.360  
7.356  
7.329  
7.324  
7.311  
7.291  
7.249  
7.237  
7.234  
7.184  
7.165  
7.155  
7.150  
7.143  
6.904  
6.901  
6.886  
6.881  
5.905  
5.900  
5.881  
5.876  
5.433  
5.409

3.496  
3.457  
3.438  
3.399

1.985  
1.981

1.267

0.078  
-0.000

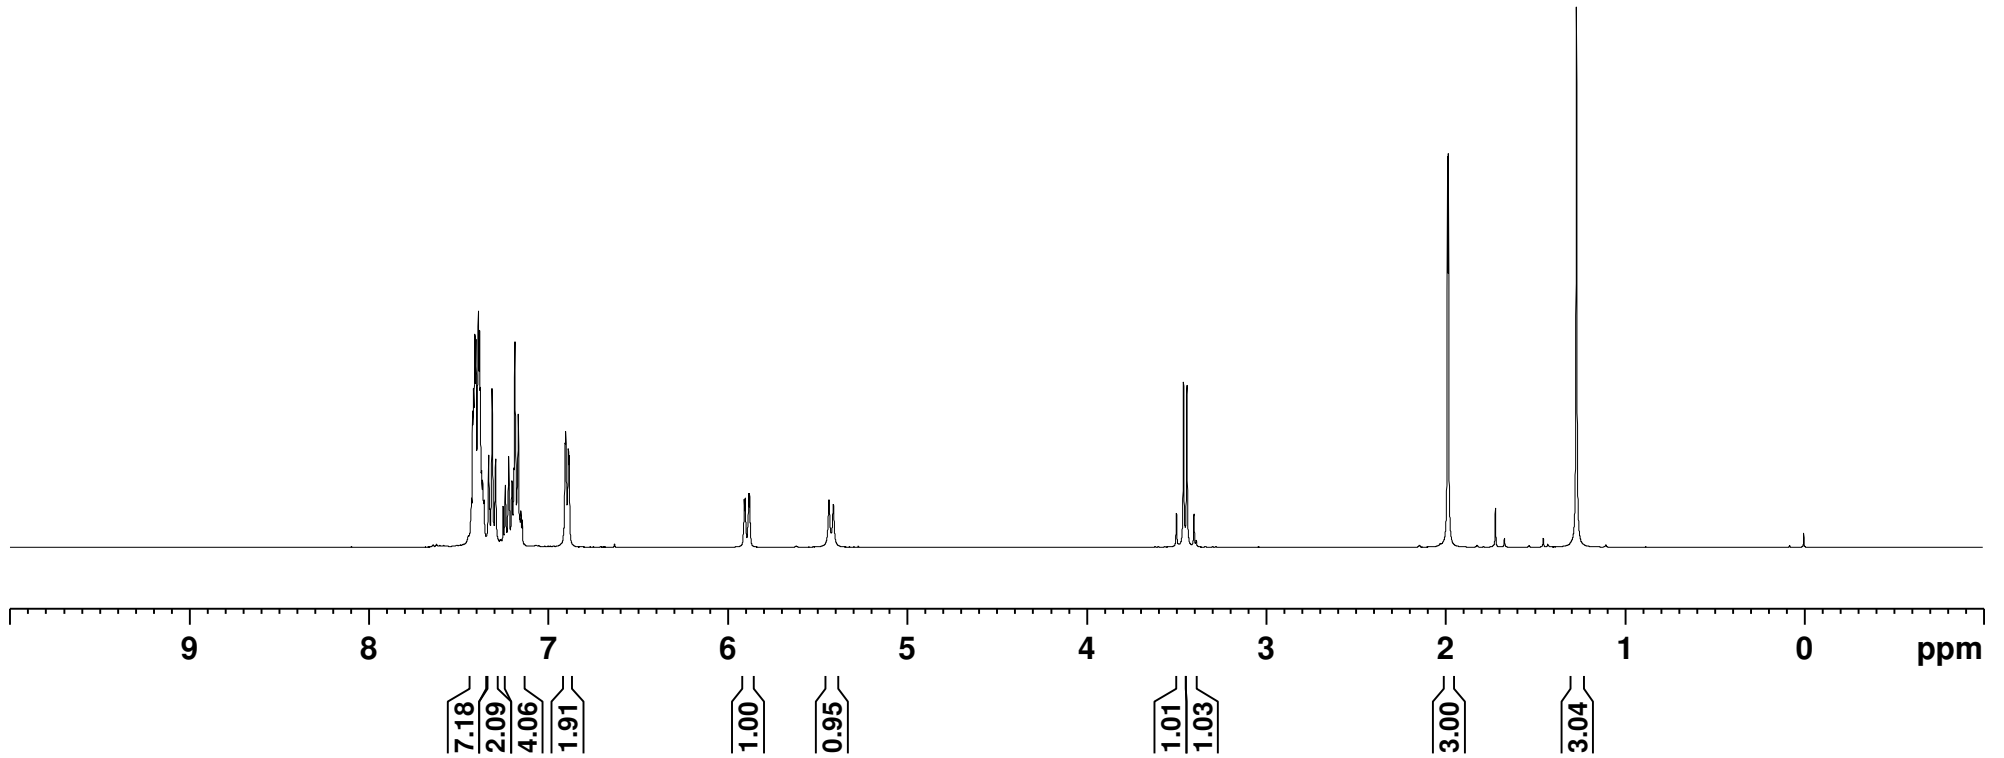

# <sup>13</sup>C NMR (100 MHz, CDCl<sub>3</sub>)

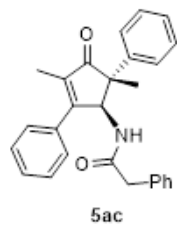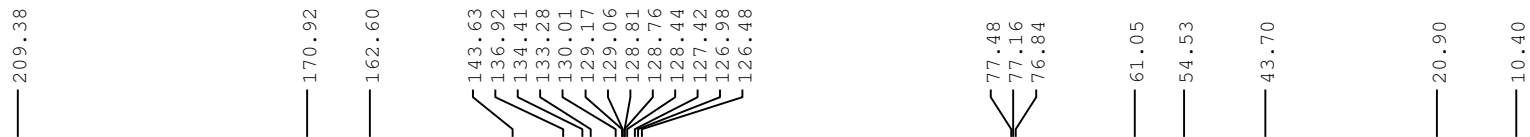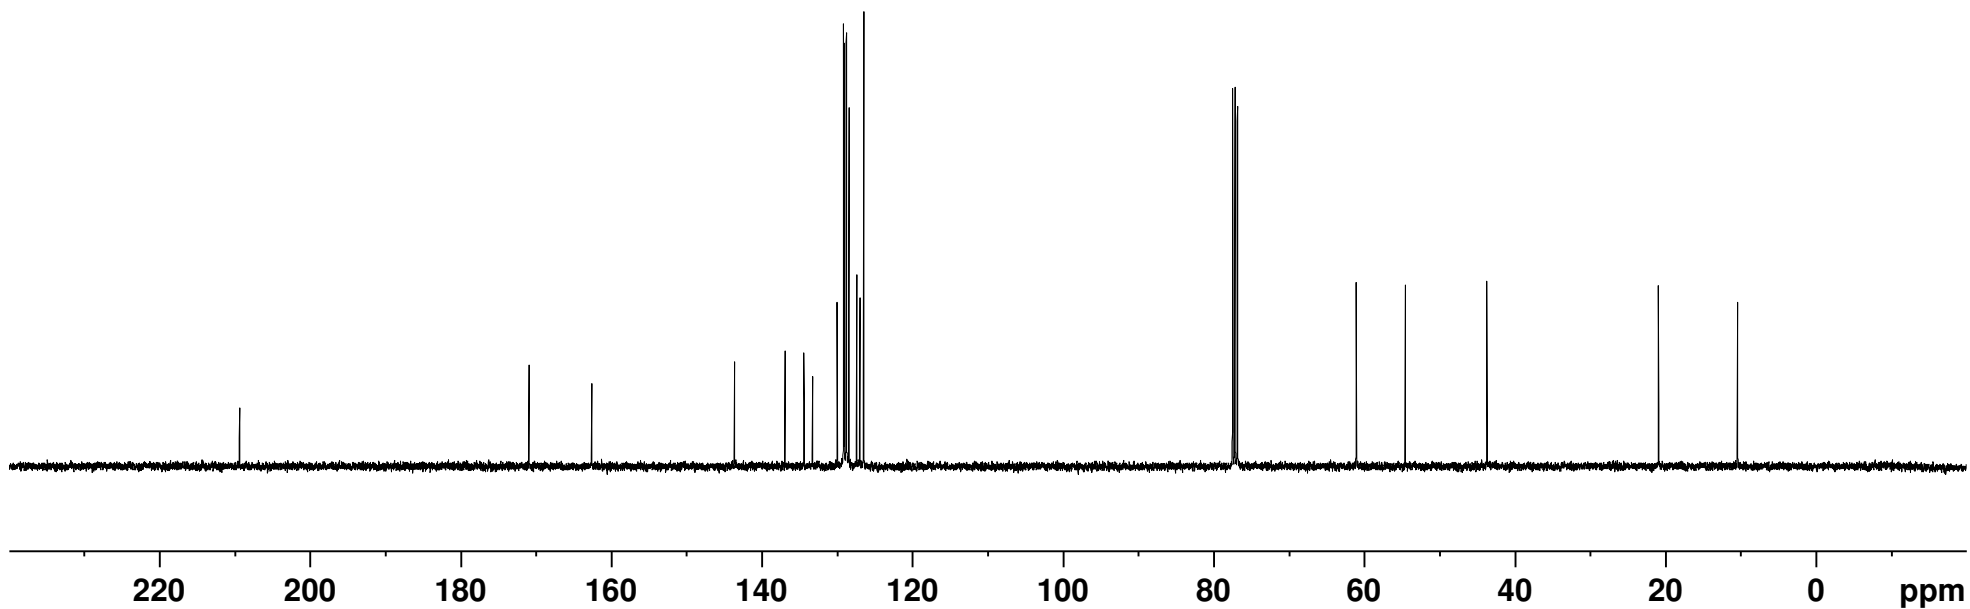

<sup>1</sup>H NMR (400 MHz, CDCl<sub>3</sub>)

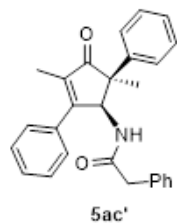

7.432  
7.423  
7.370  
7.363  
7.262  
7.250  
7.242  
7.233  
7.109  
7.091  
7.072  
7.025  
7.017  
6.988  
6.462  
6.444  
5.657  
5.652  
5.632  
5.627  
4.602  
4.577  
3.155  
3.114  
3.057  
3.016  
2.041  
2.036  
1.751  
-0.000

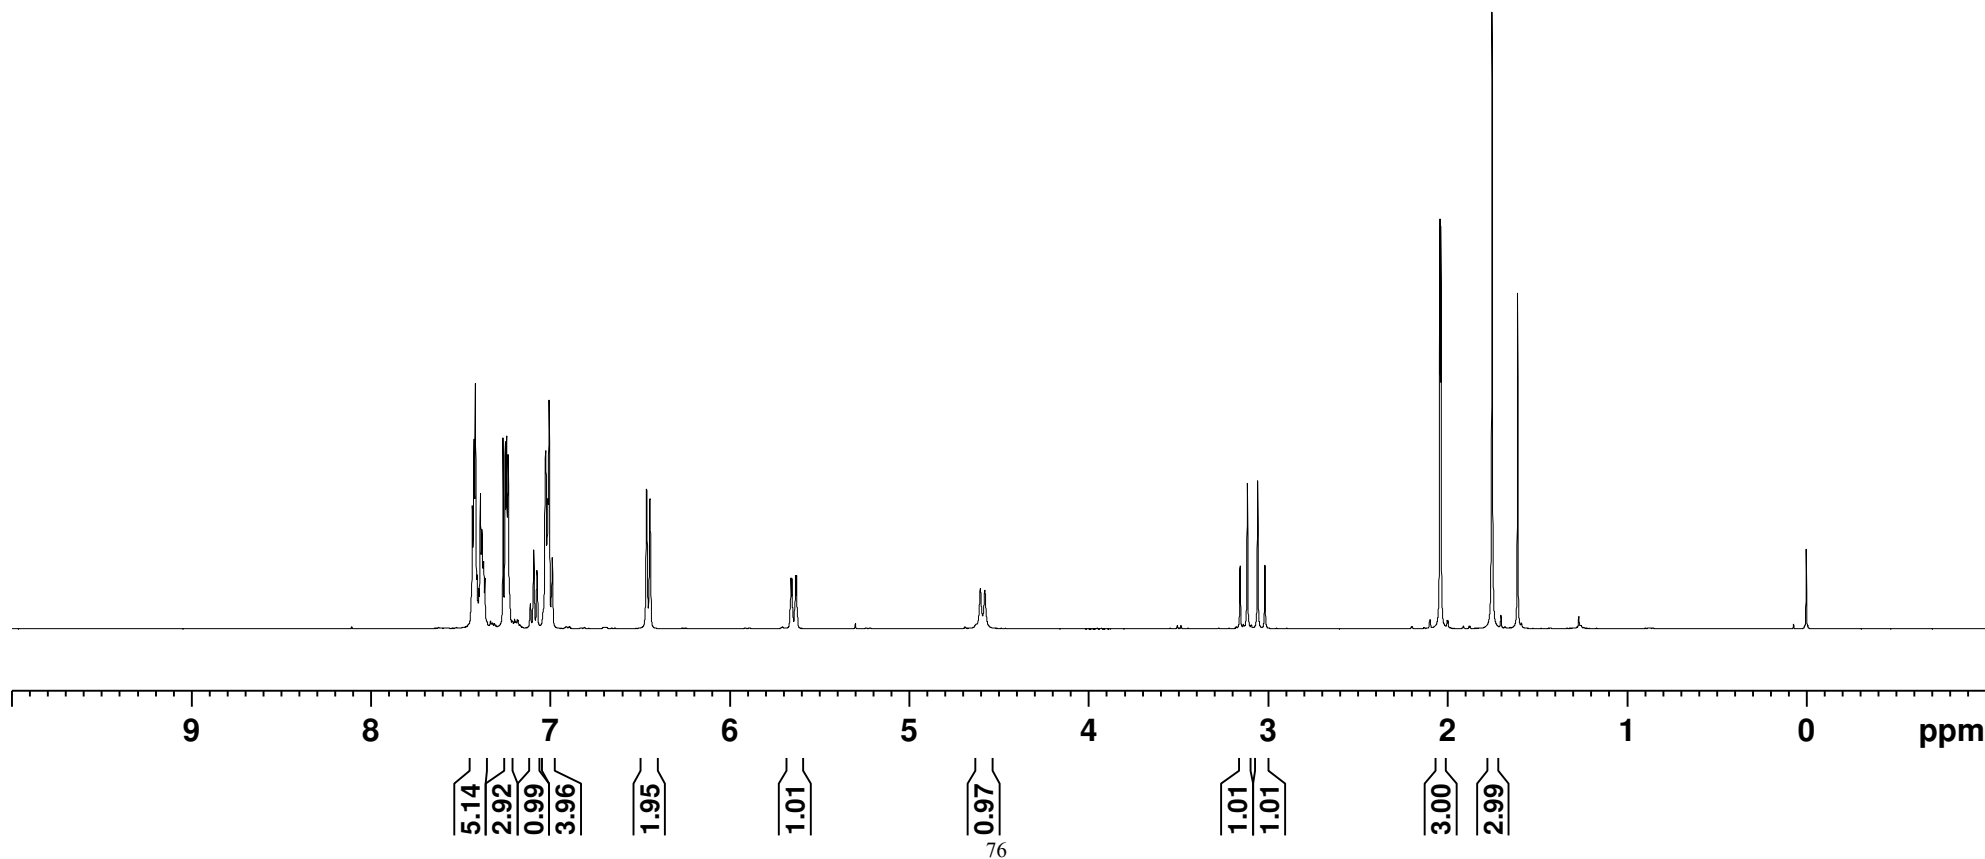

<sup>13</sup>C NMR (150 MHz, CDCl<sub>3</sub>)

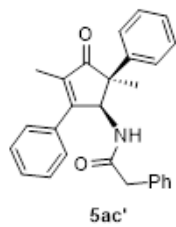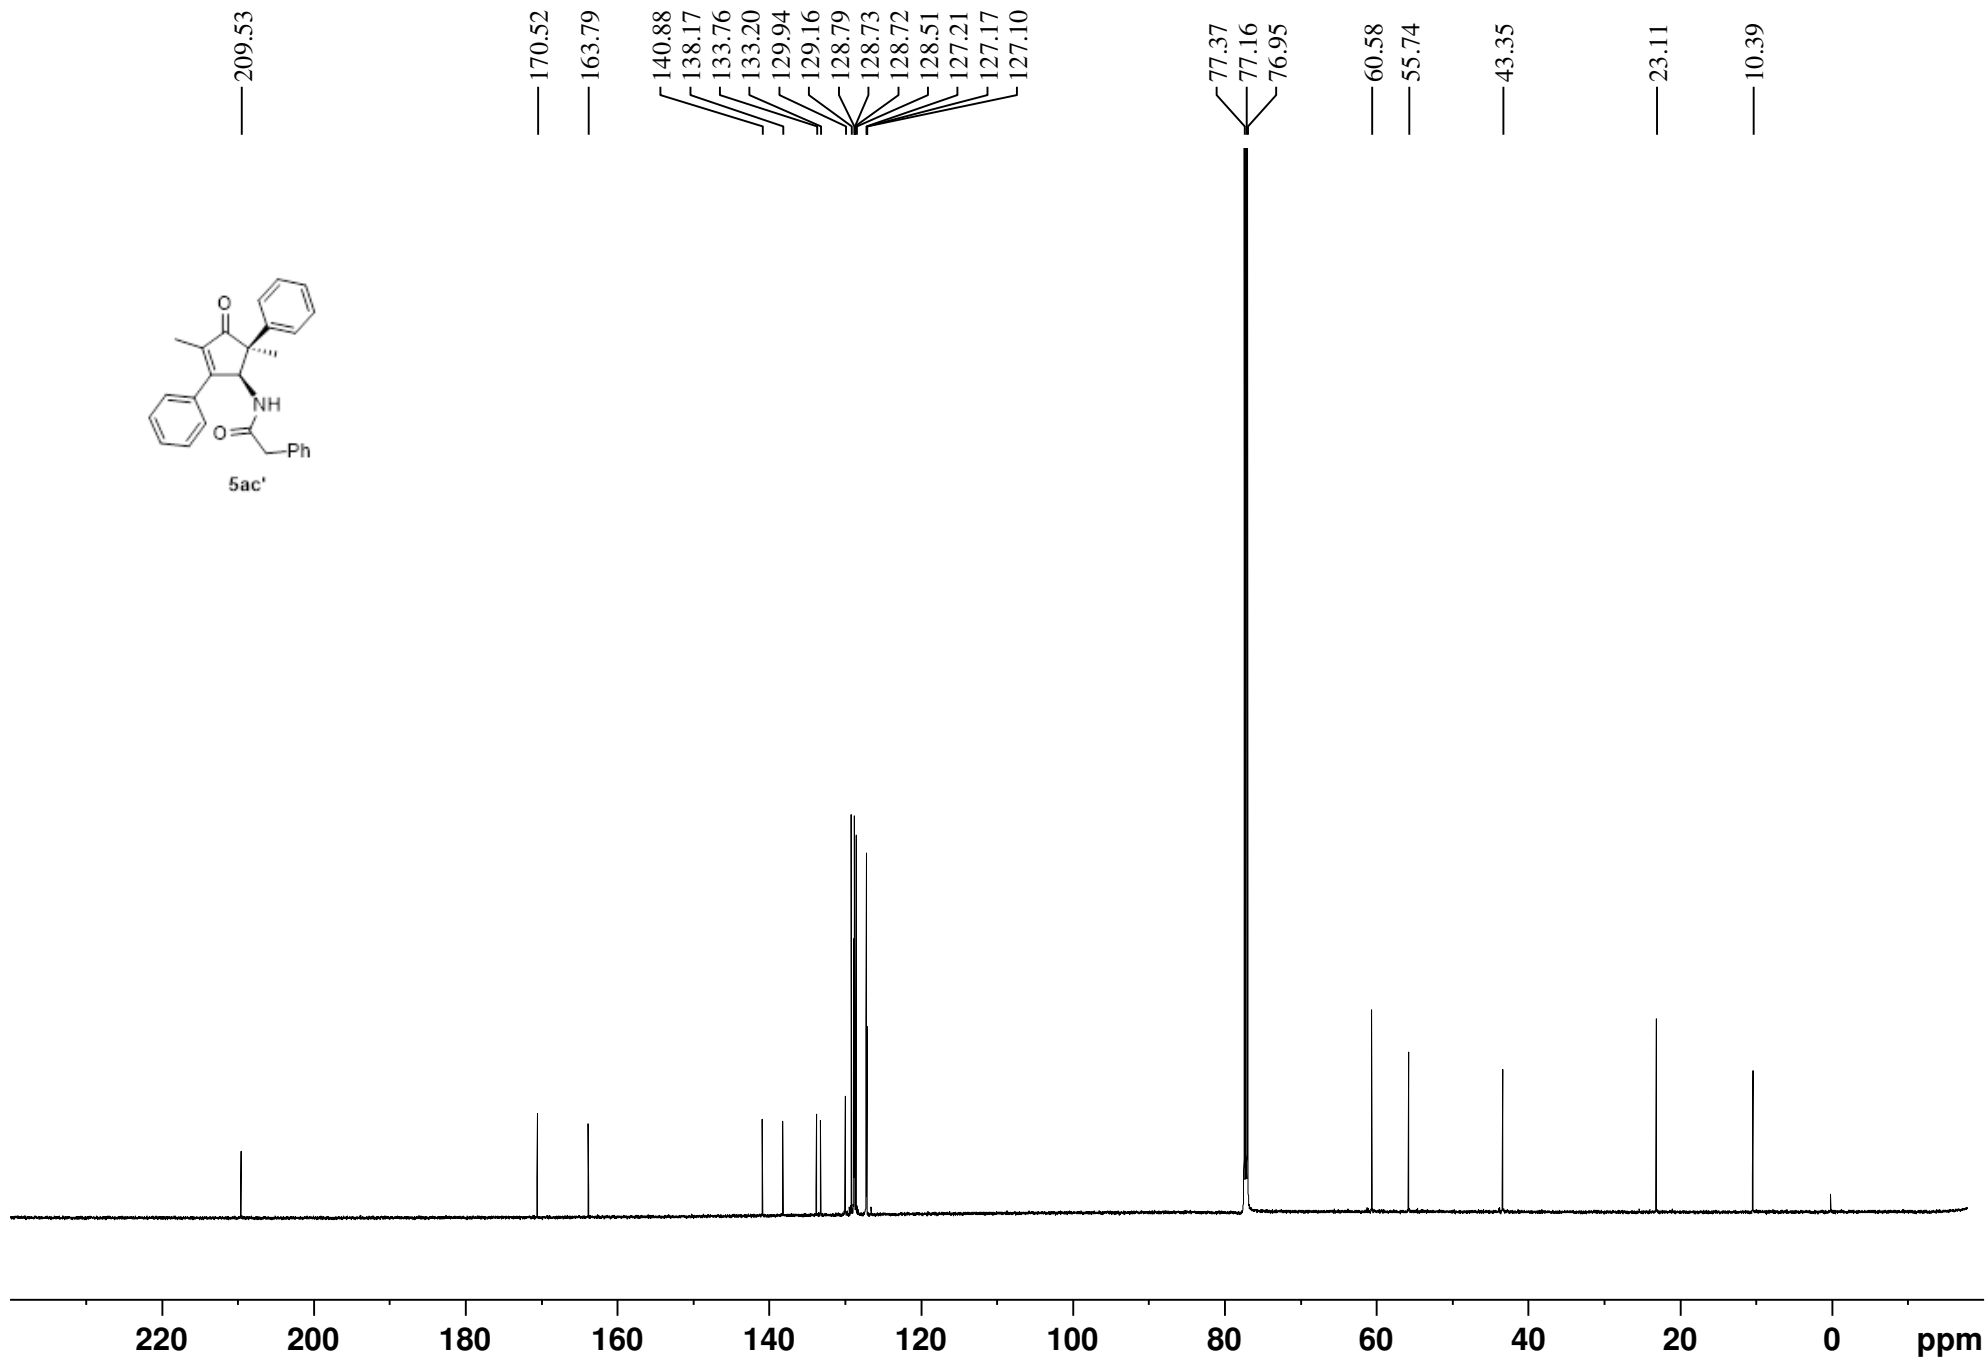

**$^1\text{H}$  NMR (400 MHz,  $\text{CDCl}_3$ )**

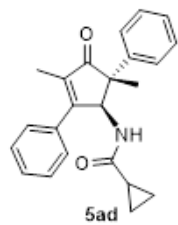

7.533  
7.528  
7.513  
7.456  
7.438  
7.343  
7.324  
7.305  
7.261  
7.240  
7.222  
7.203  
5.976  
5.952  
5.510  
5.488

2.097  
1.467  
1.269  
1.249  
1.238  
1.219  
0.998  
0.982  
0.963  
0.930  
0.893  
0.882  
0.752  
0.732  
0.680  
0.657  
0.638  
0.070  
-0.000

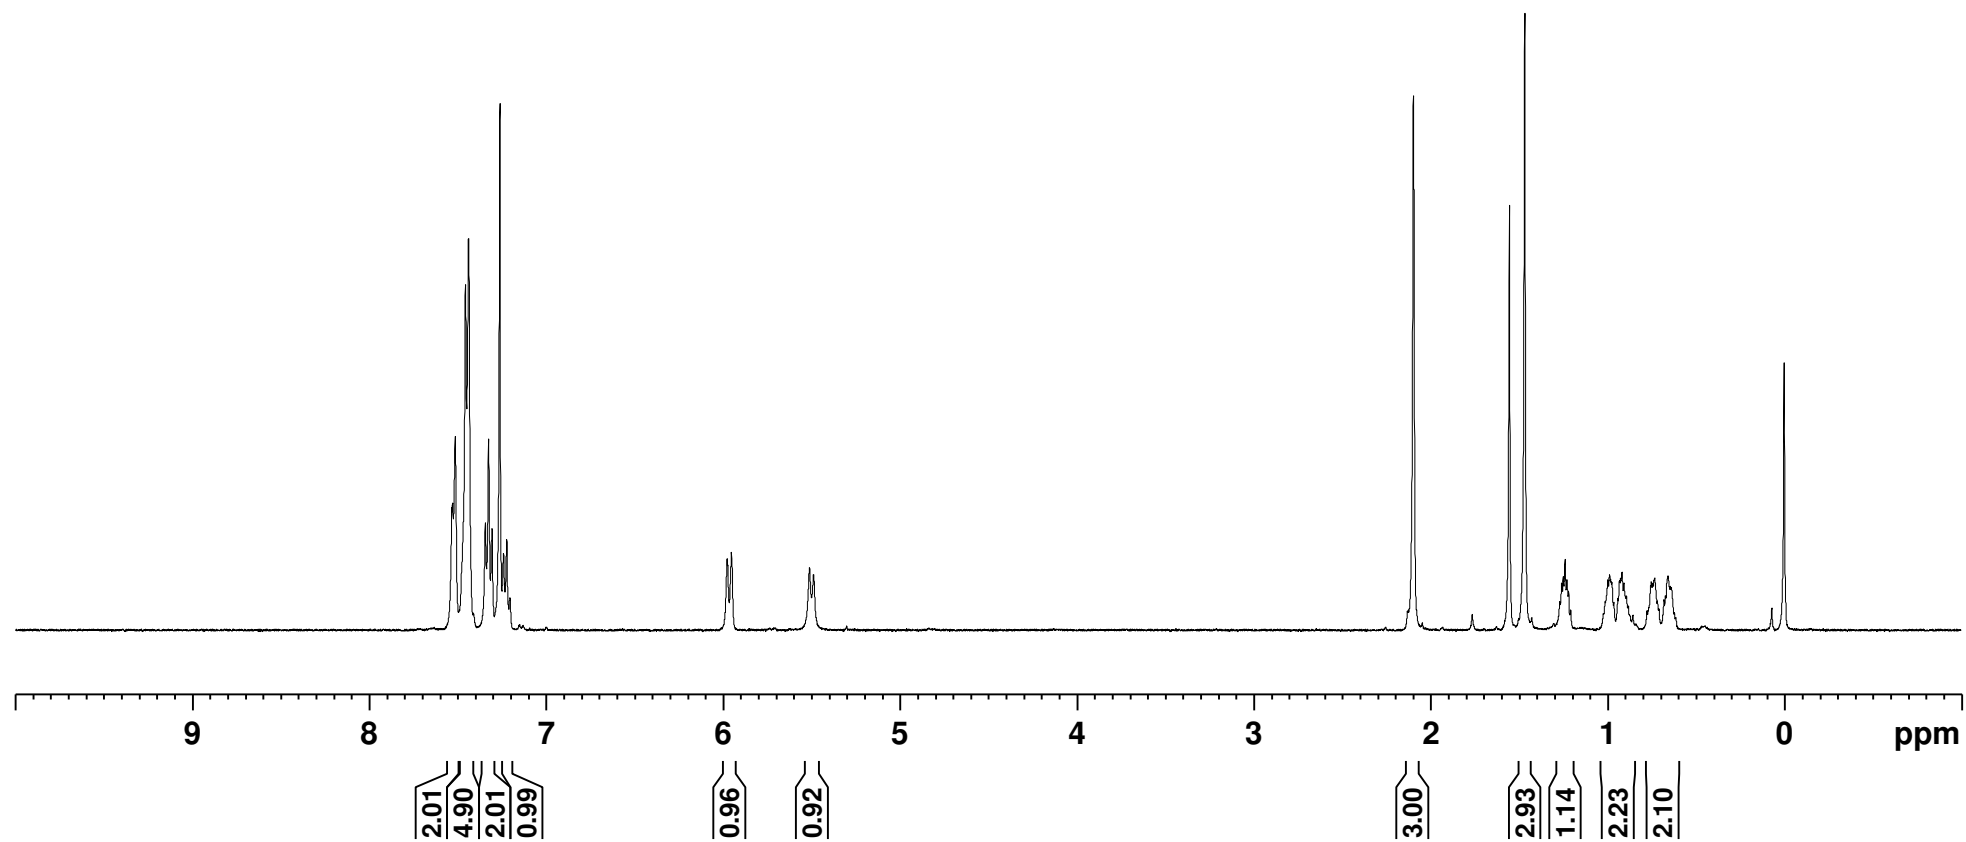



# <sup>13</sup>C NMR (100 MHz, CDCl<sub>3</sub>)

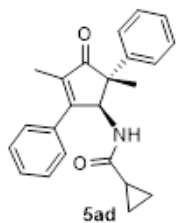

- 209.83
- 173.82
- 162.41
- 143.93
- 136.96
- 133.40
- 130.13
- 128.83
- 128.75
- 128.70
- 126.93
- 126.52
- 77.48
- 77.16
- 76.84
- 61.11
- 54.89
- 20.89
- 14.69
- 10.68
- 7.61
- 7.34

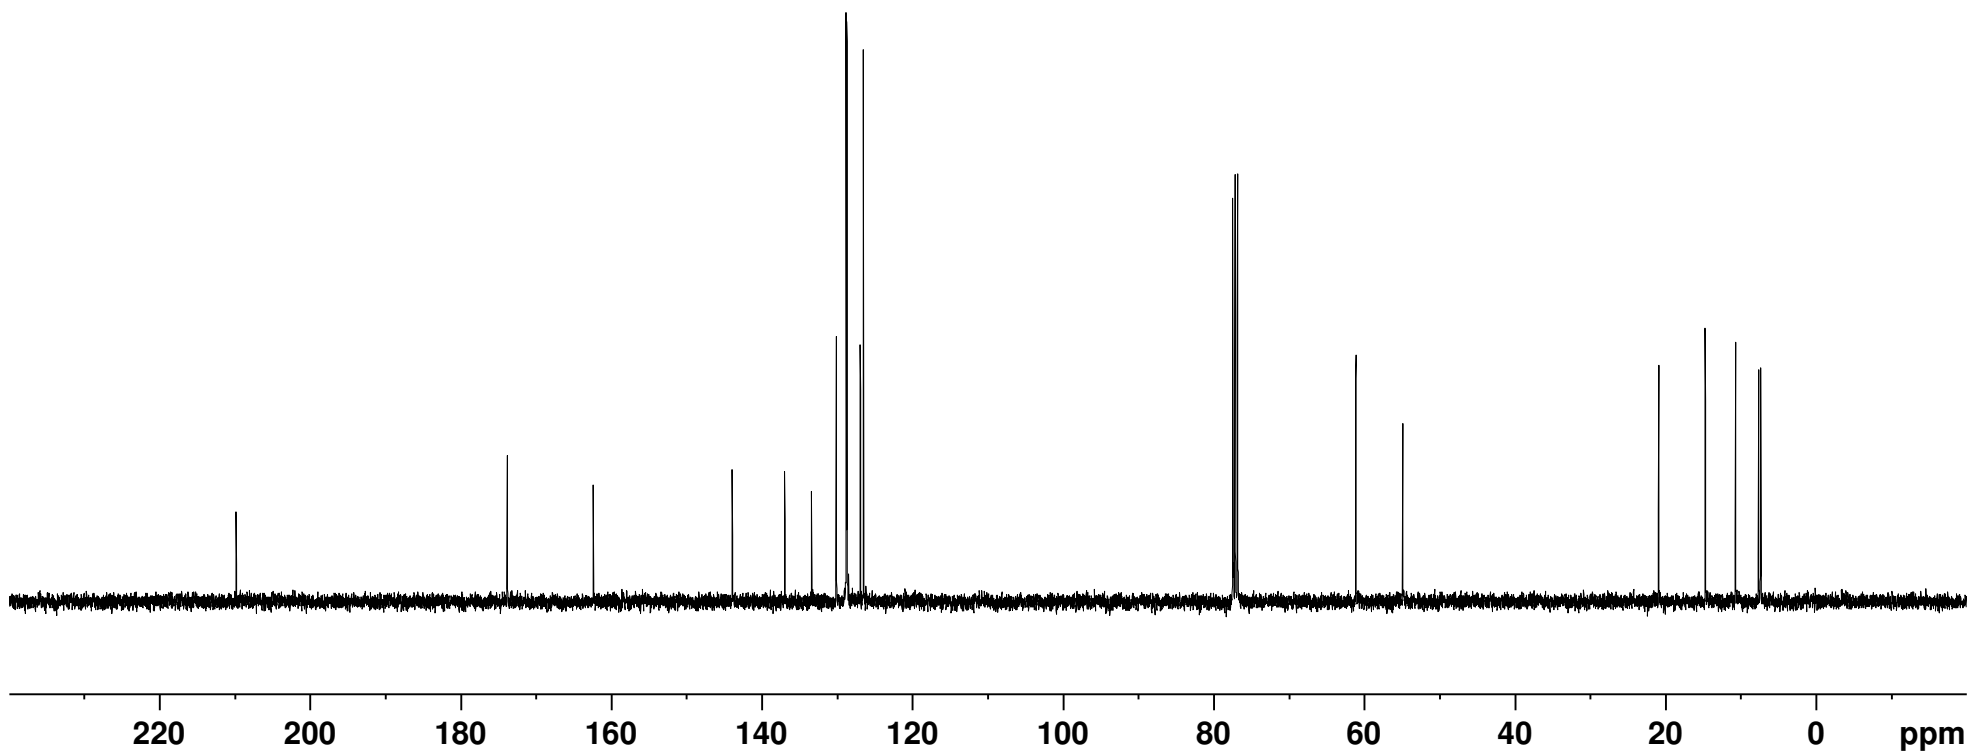

# $^1\text{H}$ NMR (400 MHz, $\text{CDCl}_3$ )

7.532  
7.528  
7.523  
7.511  
7.508  
7.502  
7.478  
7.473  
7.468  
7.457  
7.438  
7.403  
7.399  
7.323  
7.320  
7.303  
7.299  
7.284  
7.262  
7.252  
7.249  
7.231  
7.216  
7.213  
7.152  
7.148  
7.143  
7.131  
5.737  
5.732  
5.711  
5.706  
4.844  
4.818

2.130  
2.124  
1.763  
0.760  
0.745  
0.727  
0.714  
0.703  
0.694  
0.682  
0.656  
0.648  
0.636  
0.625  
0.610  
0.488  
0.464  
0.445  
0.437  
0.433  
0.414  
0.410  
0.070  
-0.000

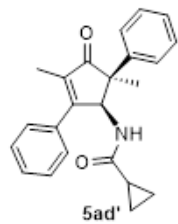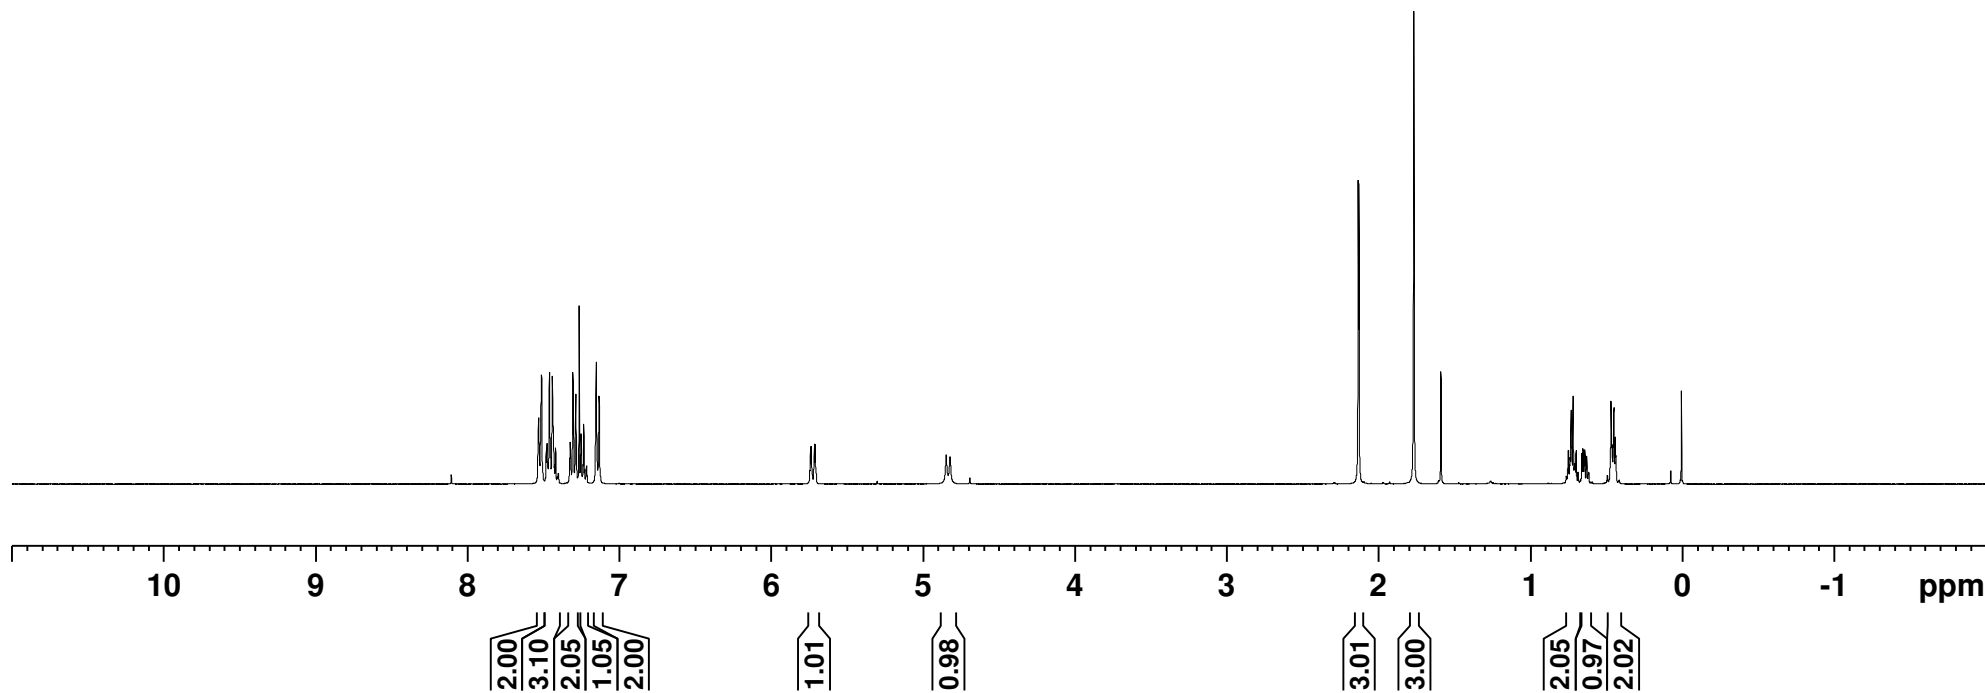

<sup>13</sup>C NMR (100 MHz, CDCl<sub>3</sub>)

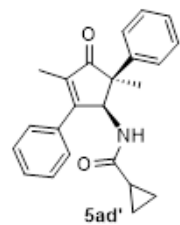

— 209.86

— 173.57

— 163.56

141.04  
138.07  
133.32  
130.06  
128.84  
128.77  
128.53  
127.59  
127.24

77.48  
77.16  
76.84

— 60.56  
— 56.03

— 23.26  
14.53  
10.61  
7.38  
6.78

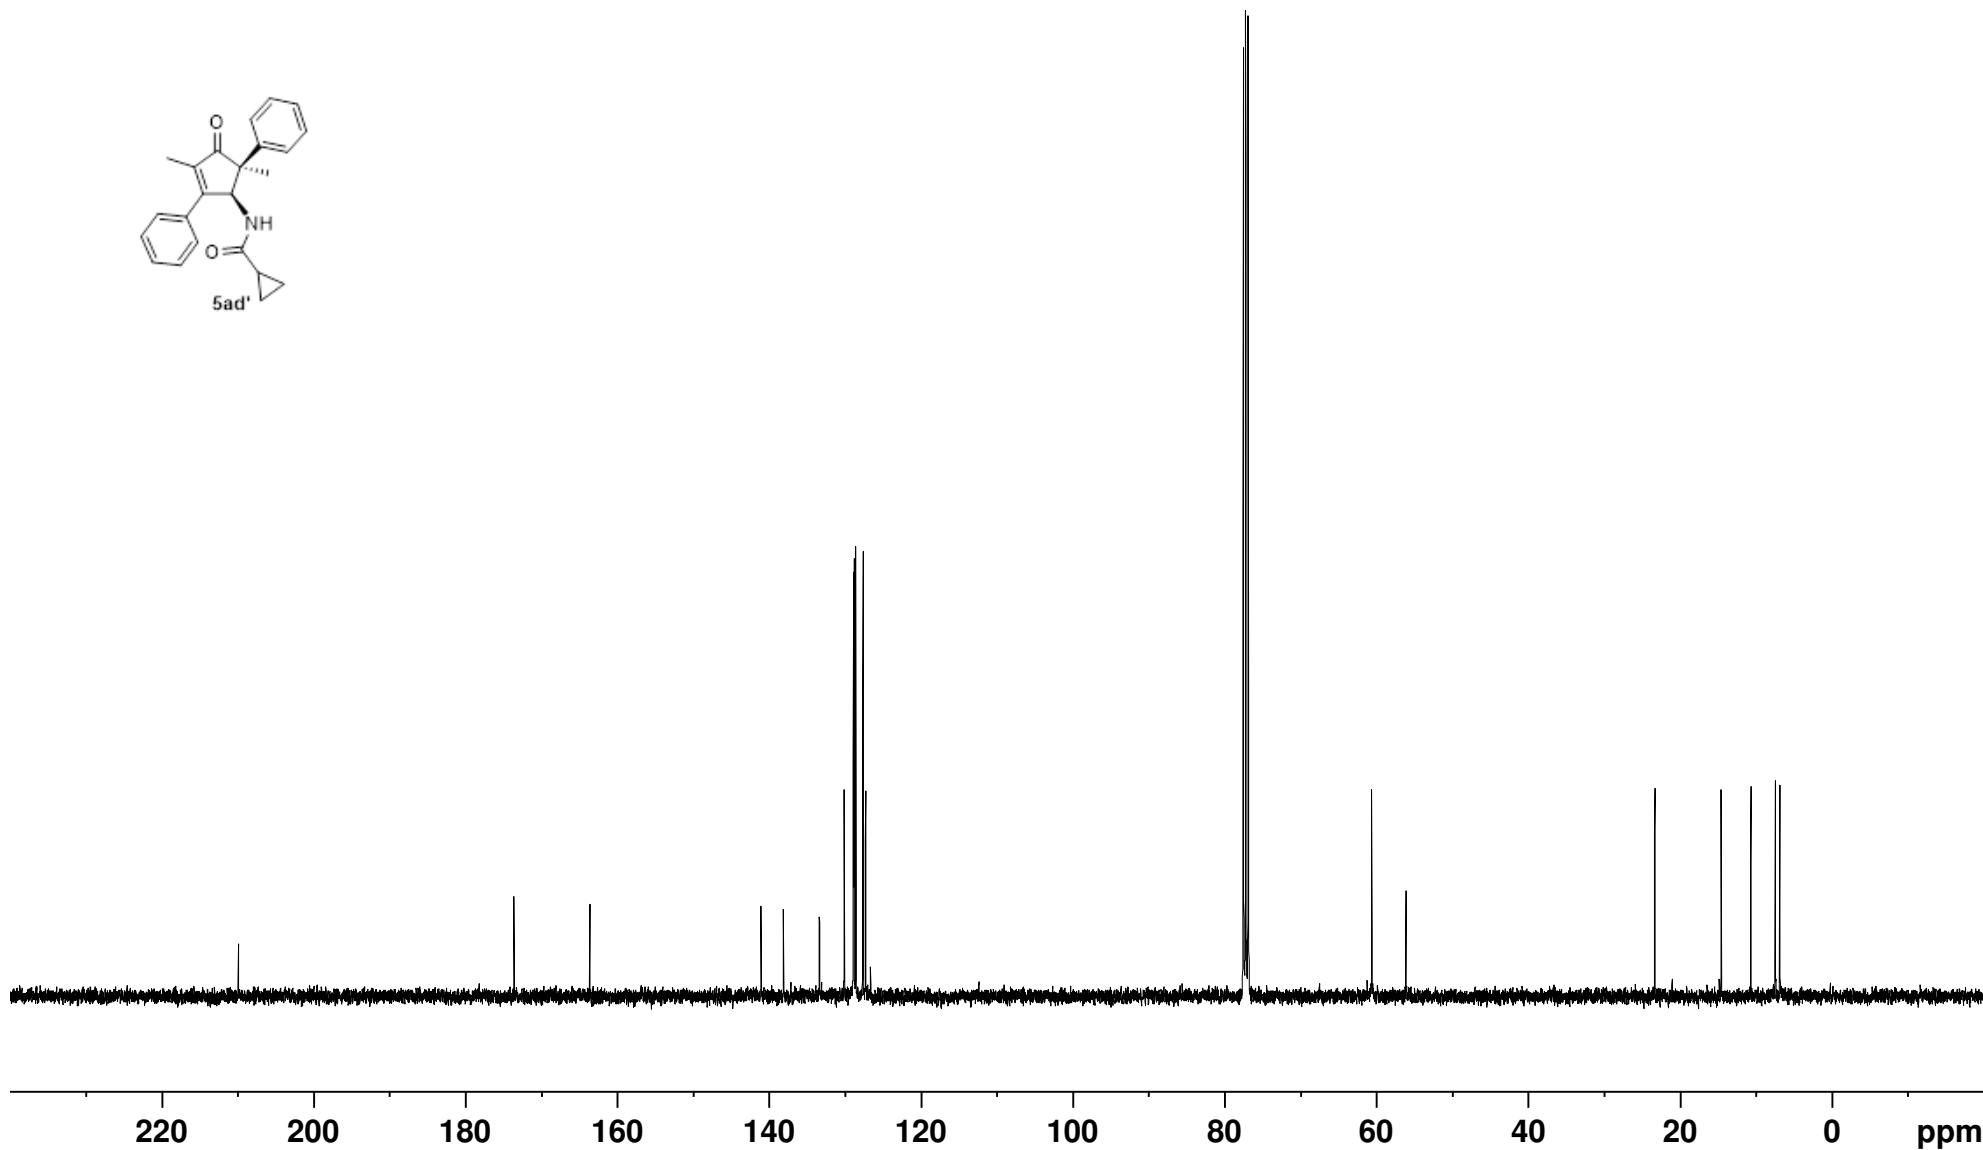

**<sup>1</sup>H NMR (400 MHz, CDCl<sub>3</sub>)**

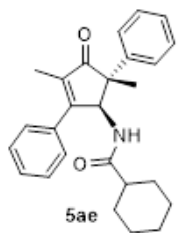

7.507  
7.502  
7.487  
7.483  
7.460  
7.440  
7.417  
7.413  
7.405  
7.341  
7.323  
7.303  
7.262  
7.240  
7.222  
7.203  
5.953  
5.949  
5.929  
5.925  
5.431  
5.407

2.080  
2.076  
2.038  
2.029  
2.021  
1.971  
1.963  
1.954  
1.757  
1.725  
1.700  
1.695  
1.654  
1.639  
1.630  
1.606  
1.594  
1.549  
1.516  
1.423  
1.369  
1.345  
1.339  
1.305  
1.295  
1.274  
1.242  
1.237  
1.226  
1.205  
1.195  
1.172  
1.132  
1.108  
1.102  
0.074  
-0.000

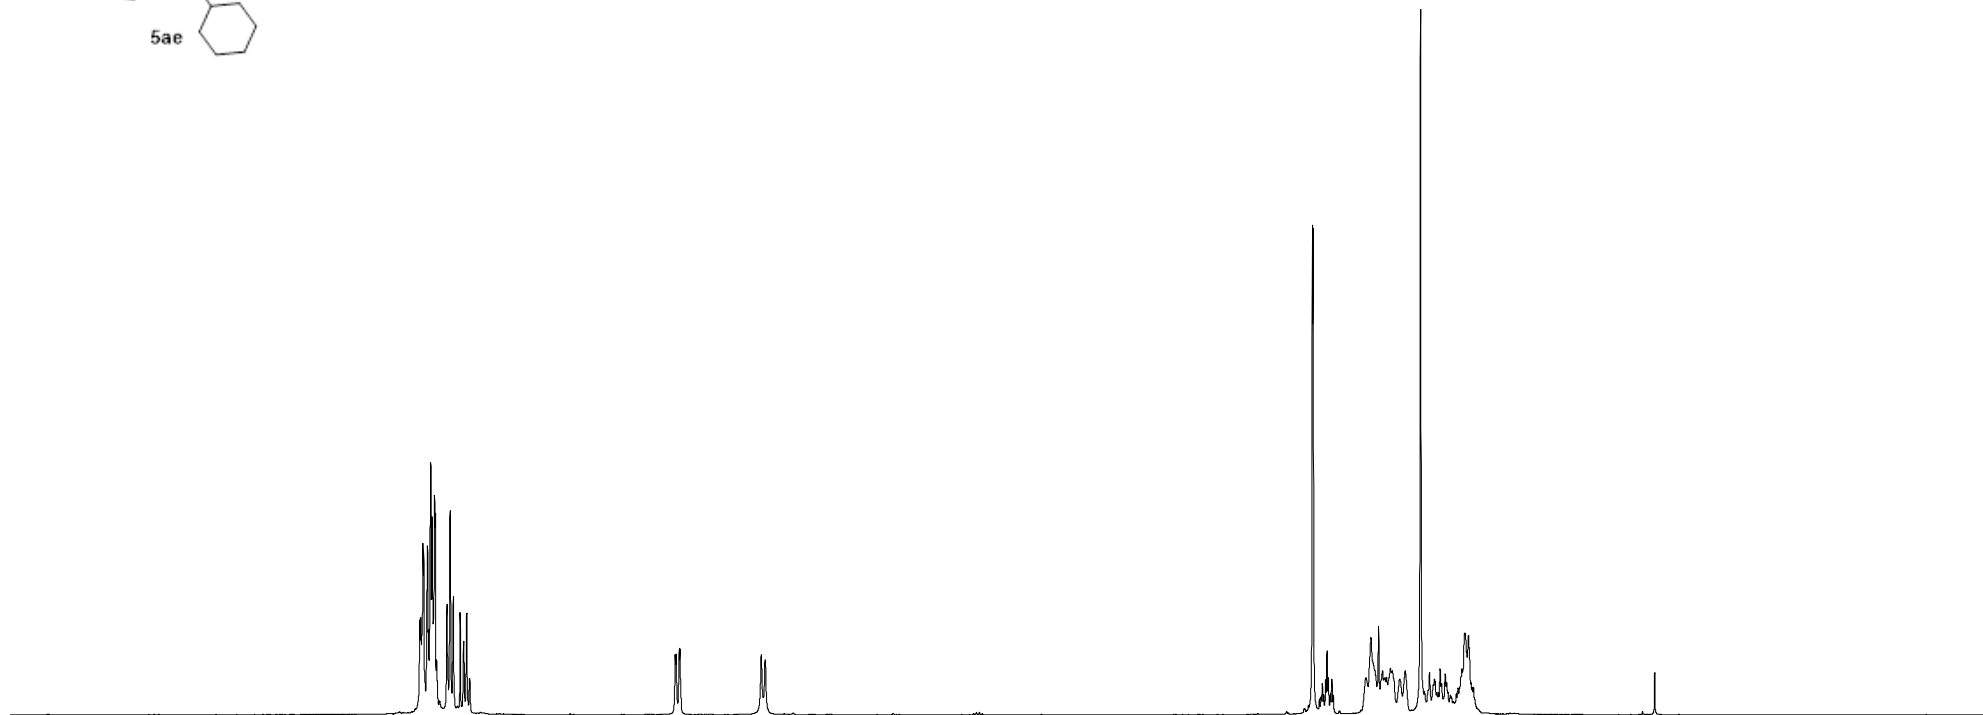

9

8

2.04  
5.01  
2.12  
1.03

6

1.00

5

0.95

4

3

3.00  
1.12  
2.07  
3.28  
3.06  
2.21  
3.03

2

1

0

-1

ppm

$^{13}\text{C}$  NMR (100 MHz,  $\text{CDCl}_3$ )

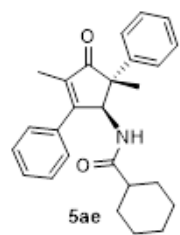

— 209.72 — 176.03 — 162.49

143.93 136.91 133.35 130.14 128.82 128.78 128.69 126.96 126.57

77.47 77.16 76.84

— 60.58 — 54.66 — 45.50

29.81 29.51 25.71 25.66 25.61 21.13

— 10.64

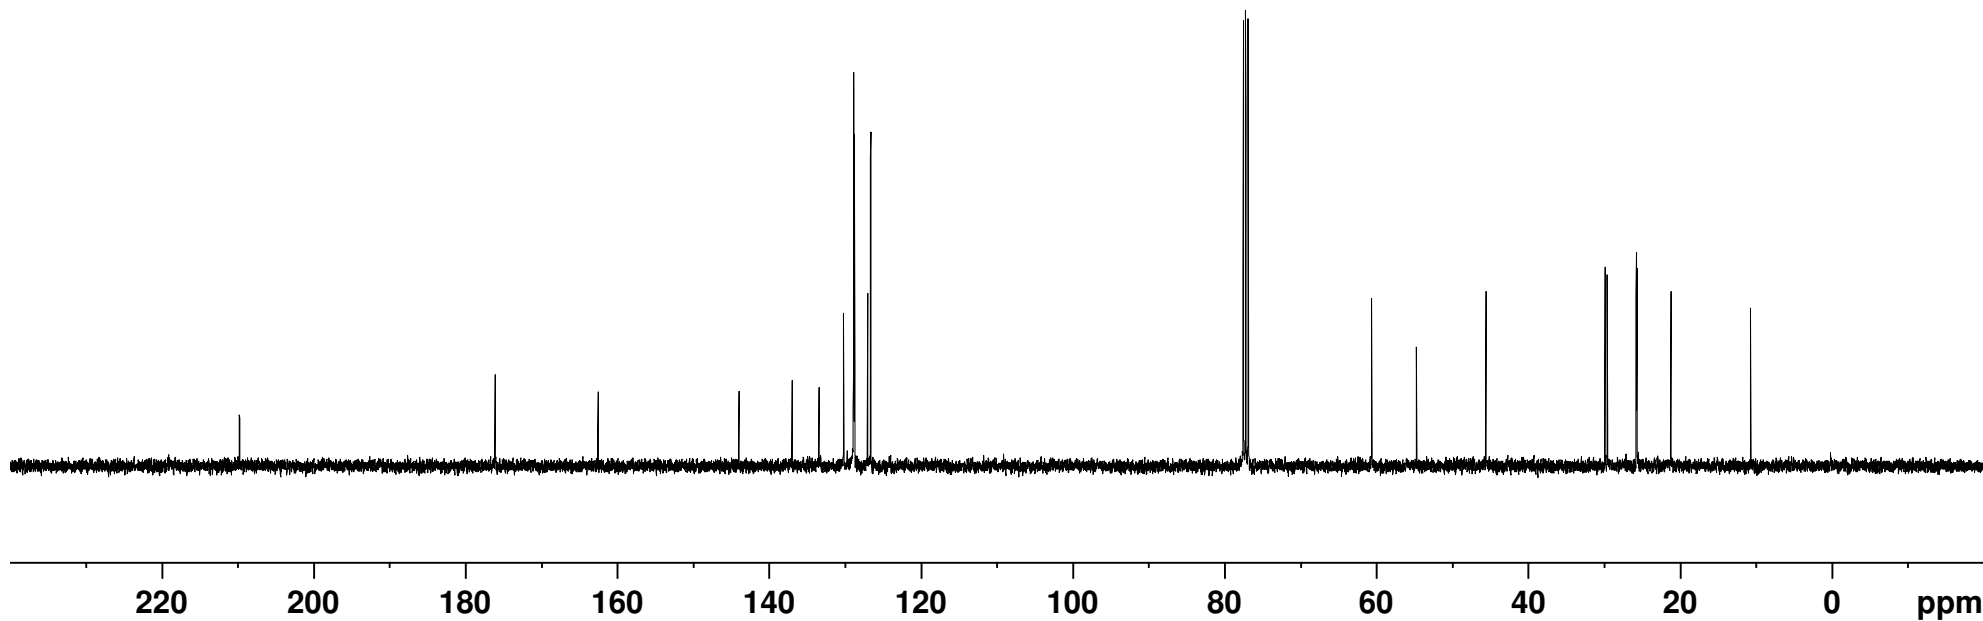

**<sup>1</sup>H NMR (400 MHz, CDCl<sub>3</sub>)**

7.516  
7.512  
7.496  
7.464  
7.457  
7.442  
7.423  
7.408  
7.395  
7.392  
7.389  
7.334  
7.311  
7.293  
7.274  
7.266  
7.241  
7.223  
7.205  
7.141  
7.138  
7.120  
5.710  
5.706  
5.685  
5.680  
4.739  
4.714

2.134  
2.129  
1.771  
1.574  
1.521  
1.502  
1.260  
1.242  
1.171  
1.140  
0.966  
0.939  
0.909  
0.884  
0.854  
0.825  
0.071  
-0.000

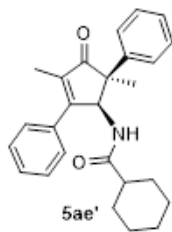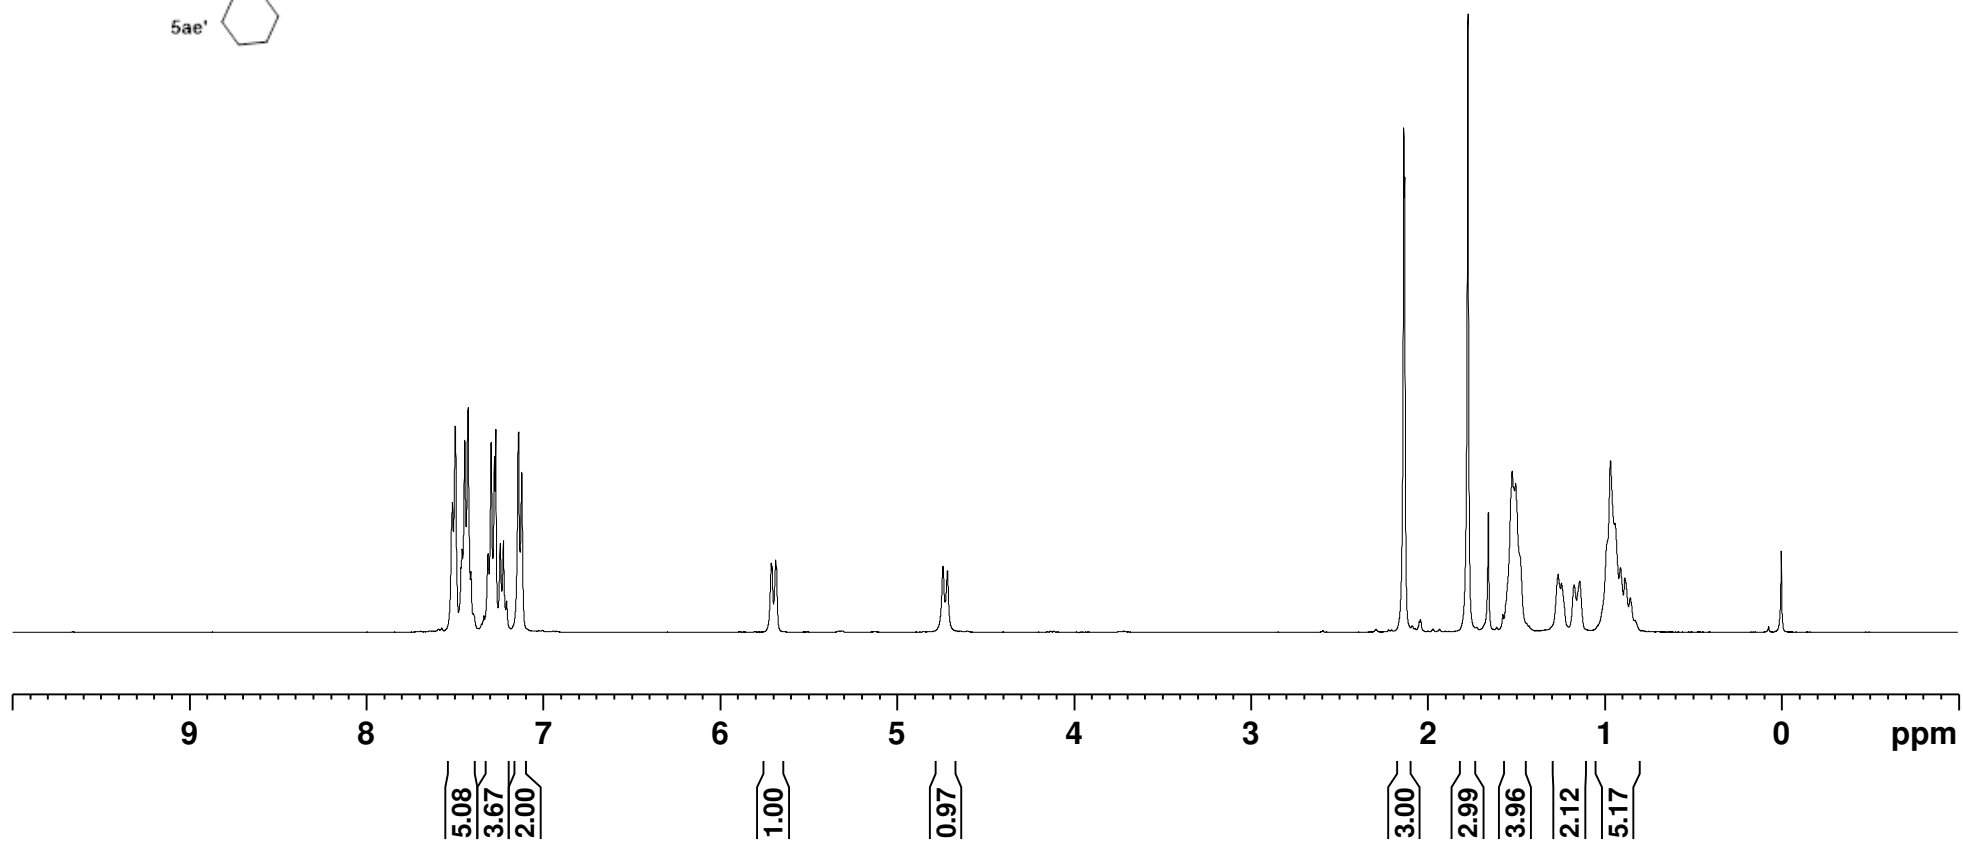

<sup>13</sup>C NMR (100 MHz, CDCl<sub>3</sub>)

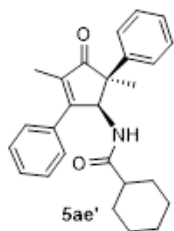

- 210.00
- 175.60
- 163.73
- 141.07
- 137.94
- 133.19
- 130.10
- 128.81
- 128.71
- 128.60
- 127.49
- 127.21
- 77.47
- 77.16
- 76.84
- 59.91
- 55.74
- 45.08
- 29.08
- 28.97
- 25.60
- 25.49
- 25.45
- 23.29
- 10.61

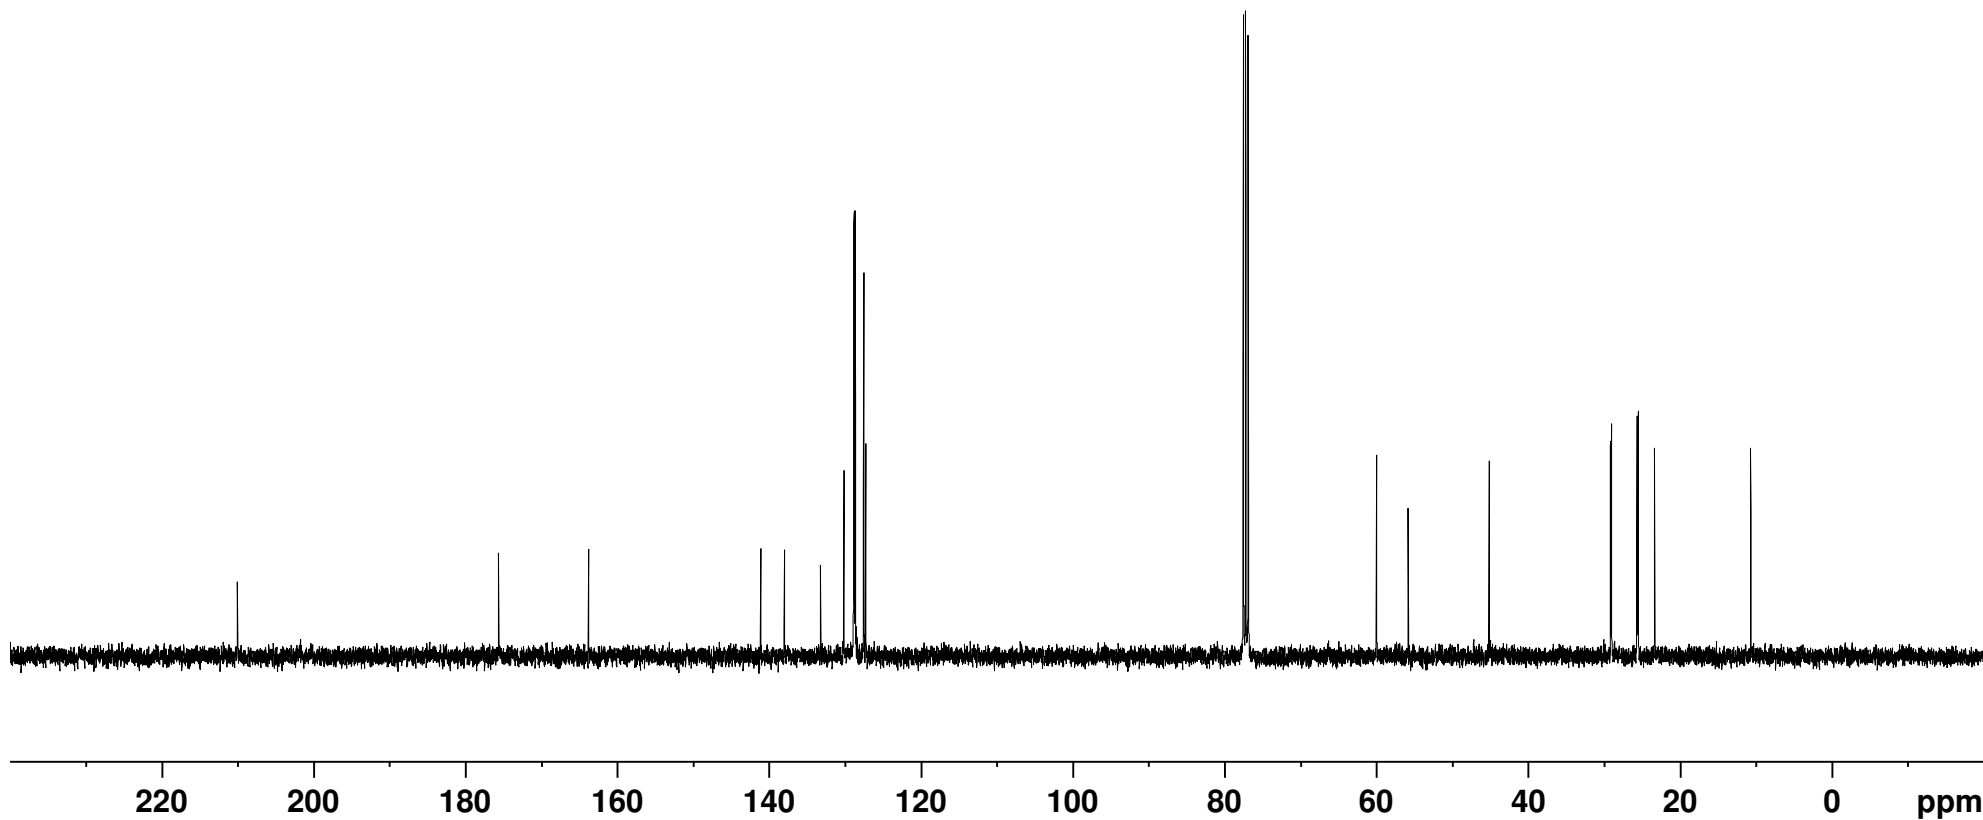

<sup>1</sup>H NMR (400 MHz, CDCl<sub>3</sub>)

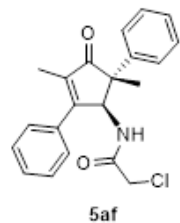

7.479  
7.465  
7.457  
7.441  
7.412  
7.392  
7.365  
7.347  
7.327  
7.271  
7.261  
7.254  
7.236  
6.487  
6.463  
5.946  
5.922

4.074  
4.036  
3.954  
3.916

— 2.090

— 1.480

0.071  
-0.000

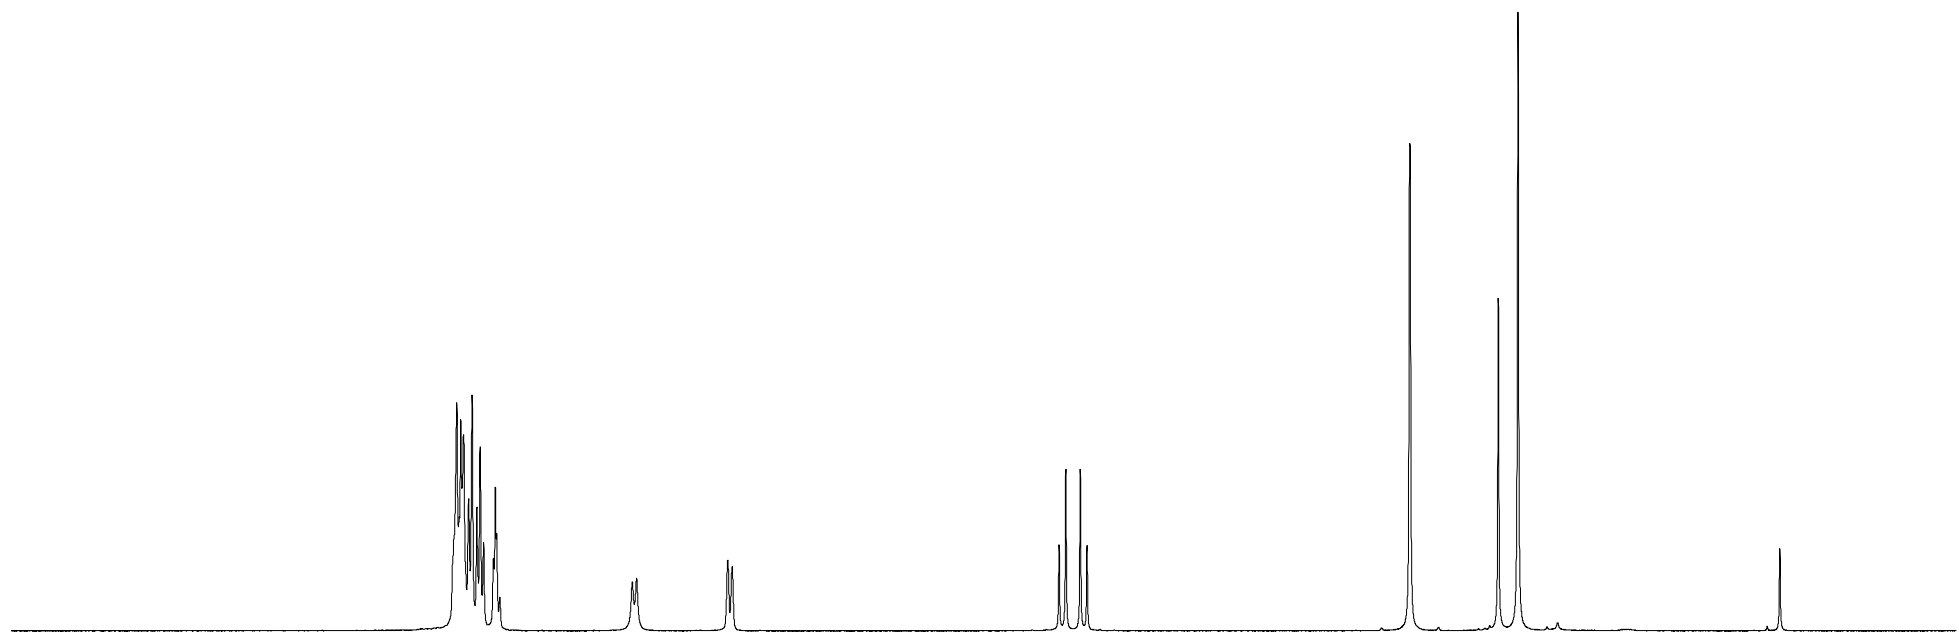

5.11  
2.10  
2.02  
1.42

0.96

1.00

1.01  
1.00

3.00

3.01



<sup>13</sup>C NMR (100 MHz, CDCl<sub>3</sub>)

— 208.97

— 166.04  
— 161.90

143.37  
137.55  
133.07  
130.24  
128.94  
128.88  
128.41  
127.17  
126.40

77.48  
77.16  
76.84

— 61.22  
— 54.59

— 42.54

— 20.78

— 10.60

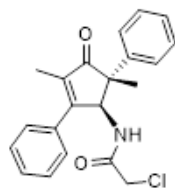

5af

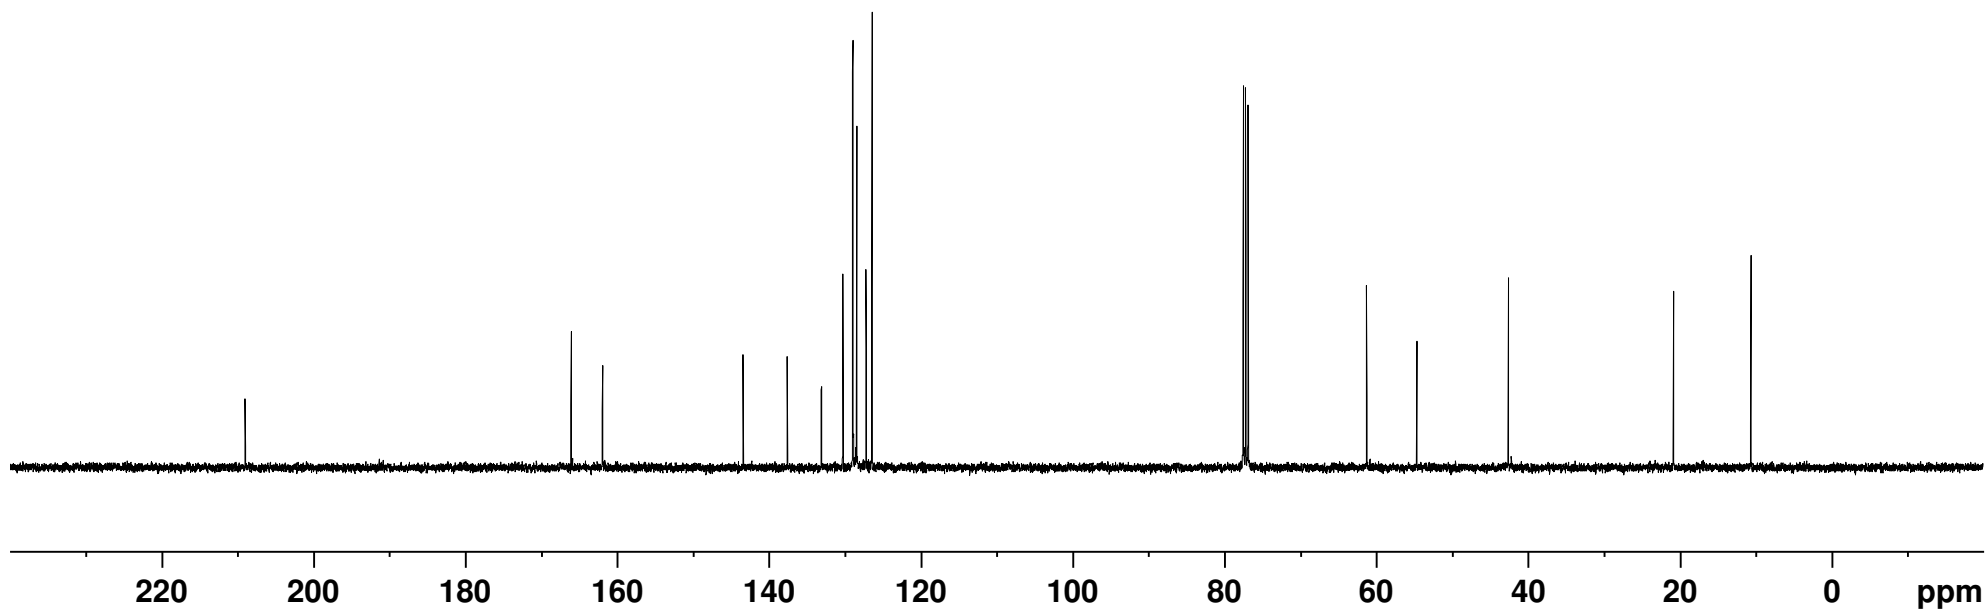

**<sup>1</sup>H NMR (400 MHz, CDCl<sub>3</sub>)**

7.522  
7.518  
7.502  
7.498  
7.481  
7.474  
7.460  
7.440  
7.423  
7.339  
7.321  
7.302  
7.272  
7.262  
7.254  
7.247  
7.235  
7.155  
7.152  
7.134  
5.803  
5.777  
5.677  
5.672  
5.651  
5.646

3.657  
3.619  
3.542  
3.504

2.135  
2.130  
1.784

0.070  
-0.000

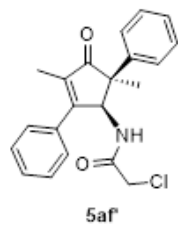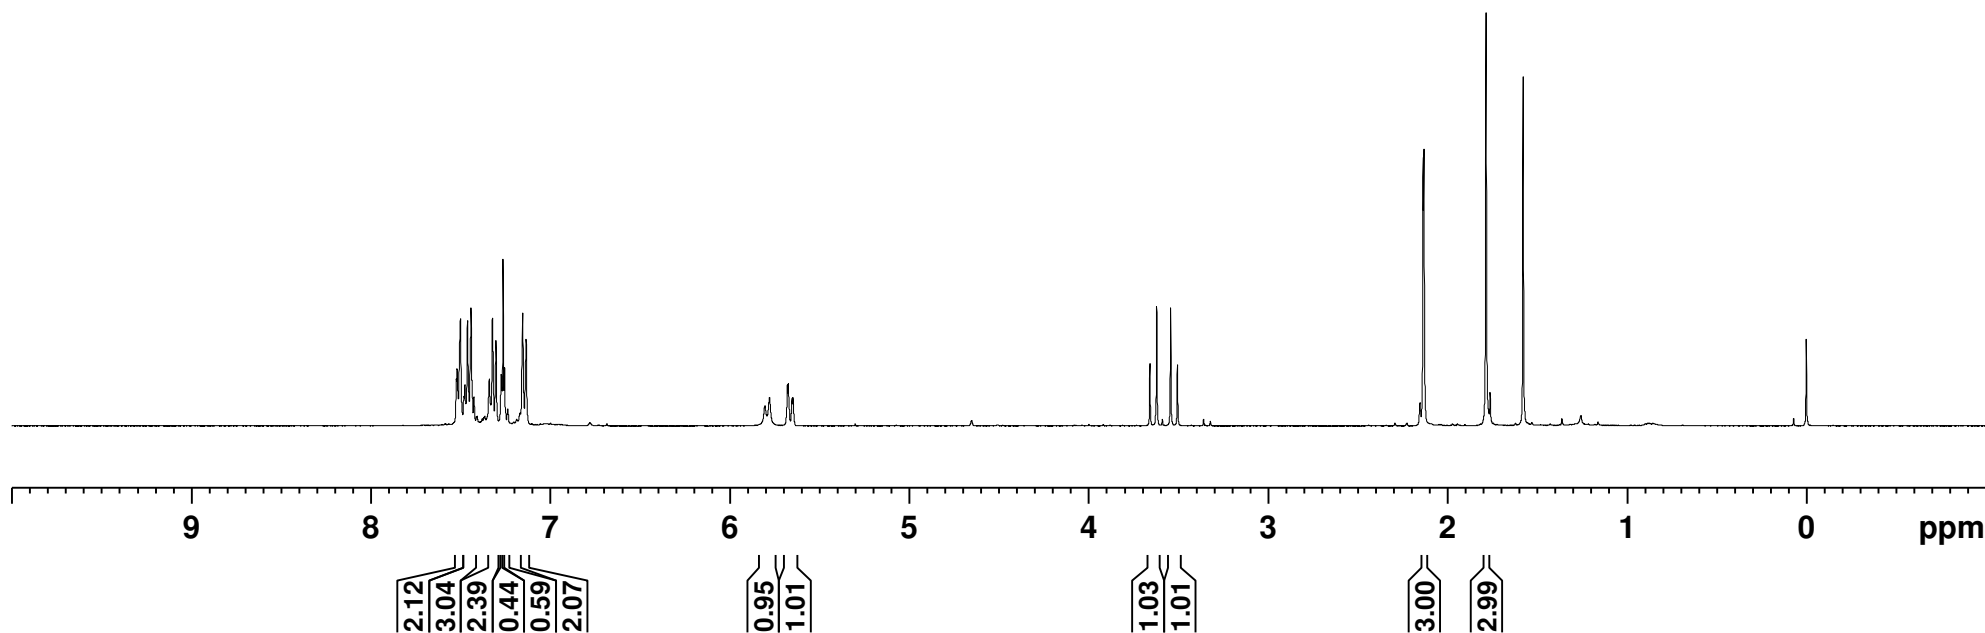

<sup>13</sup>C NMR (150 MHz, CDCl<sub>3</sub>)

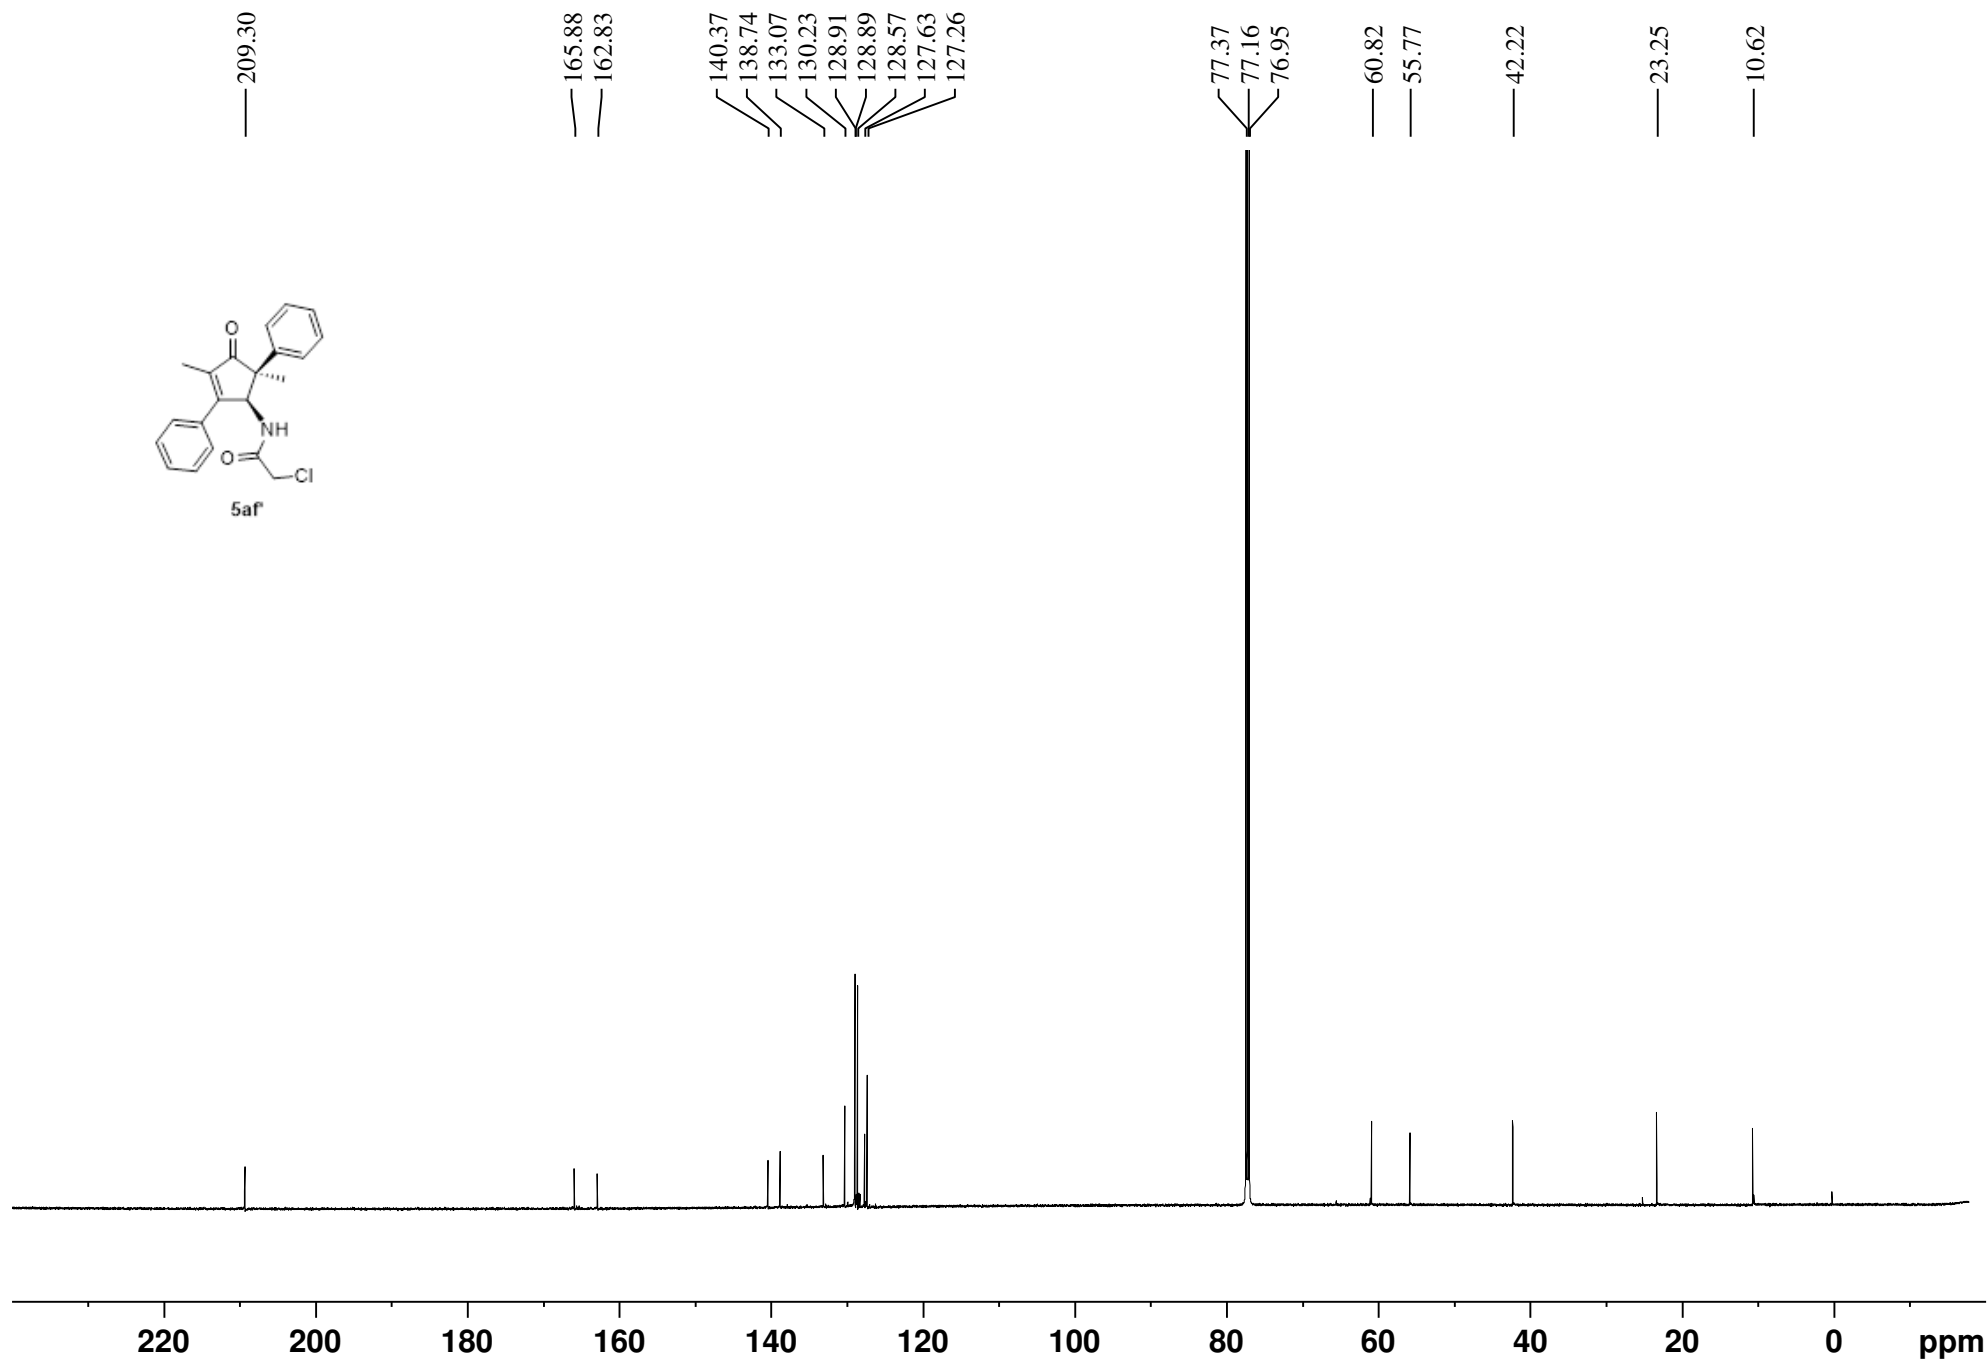

<sup>1</sup>H NMR (400 MHz, CDCl<sub>3</sub>)

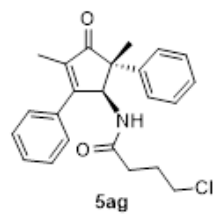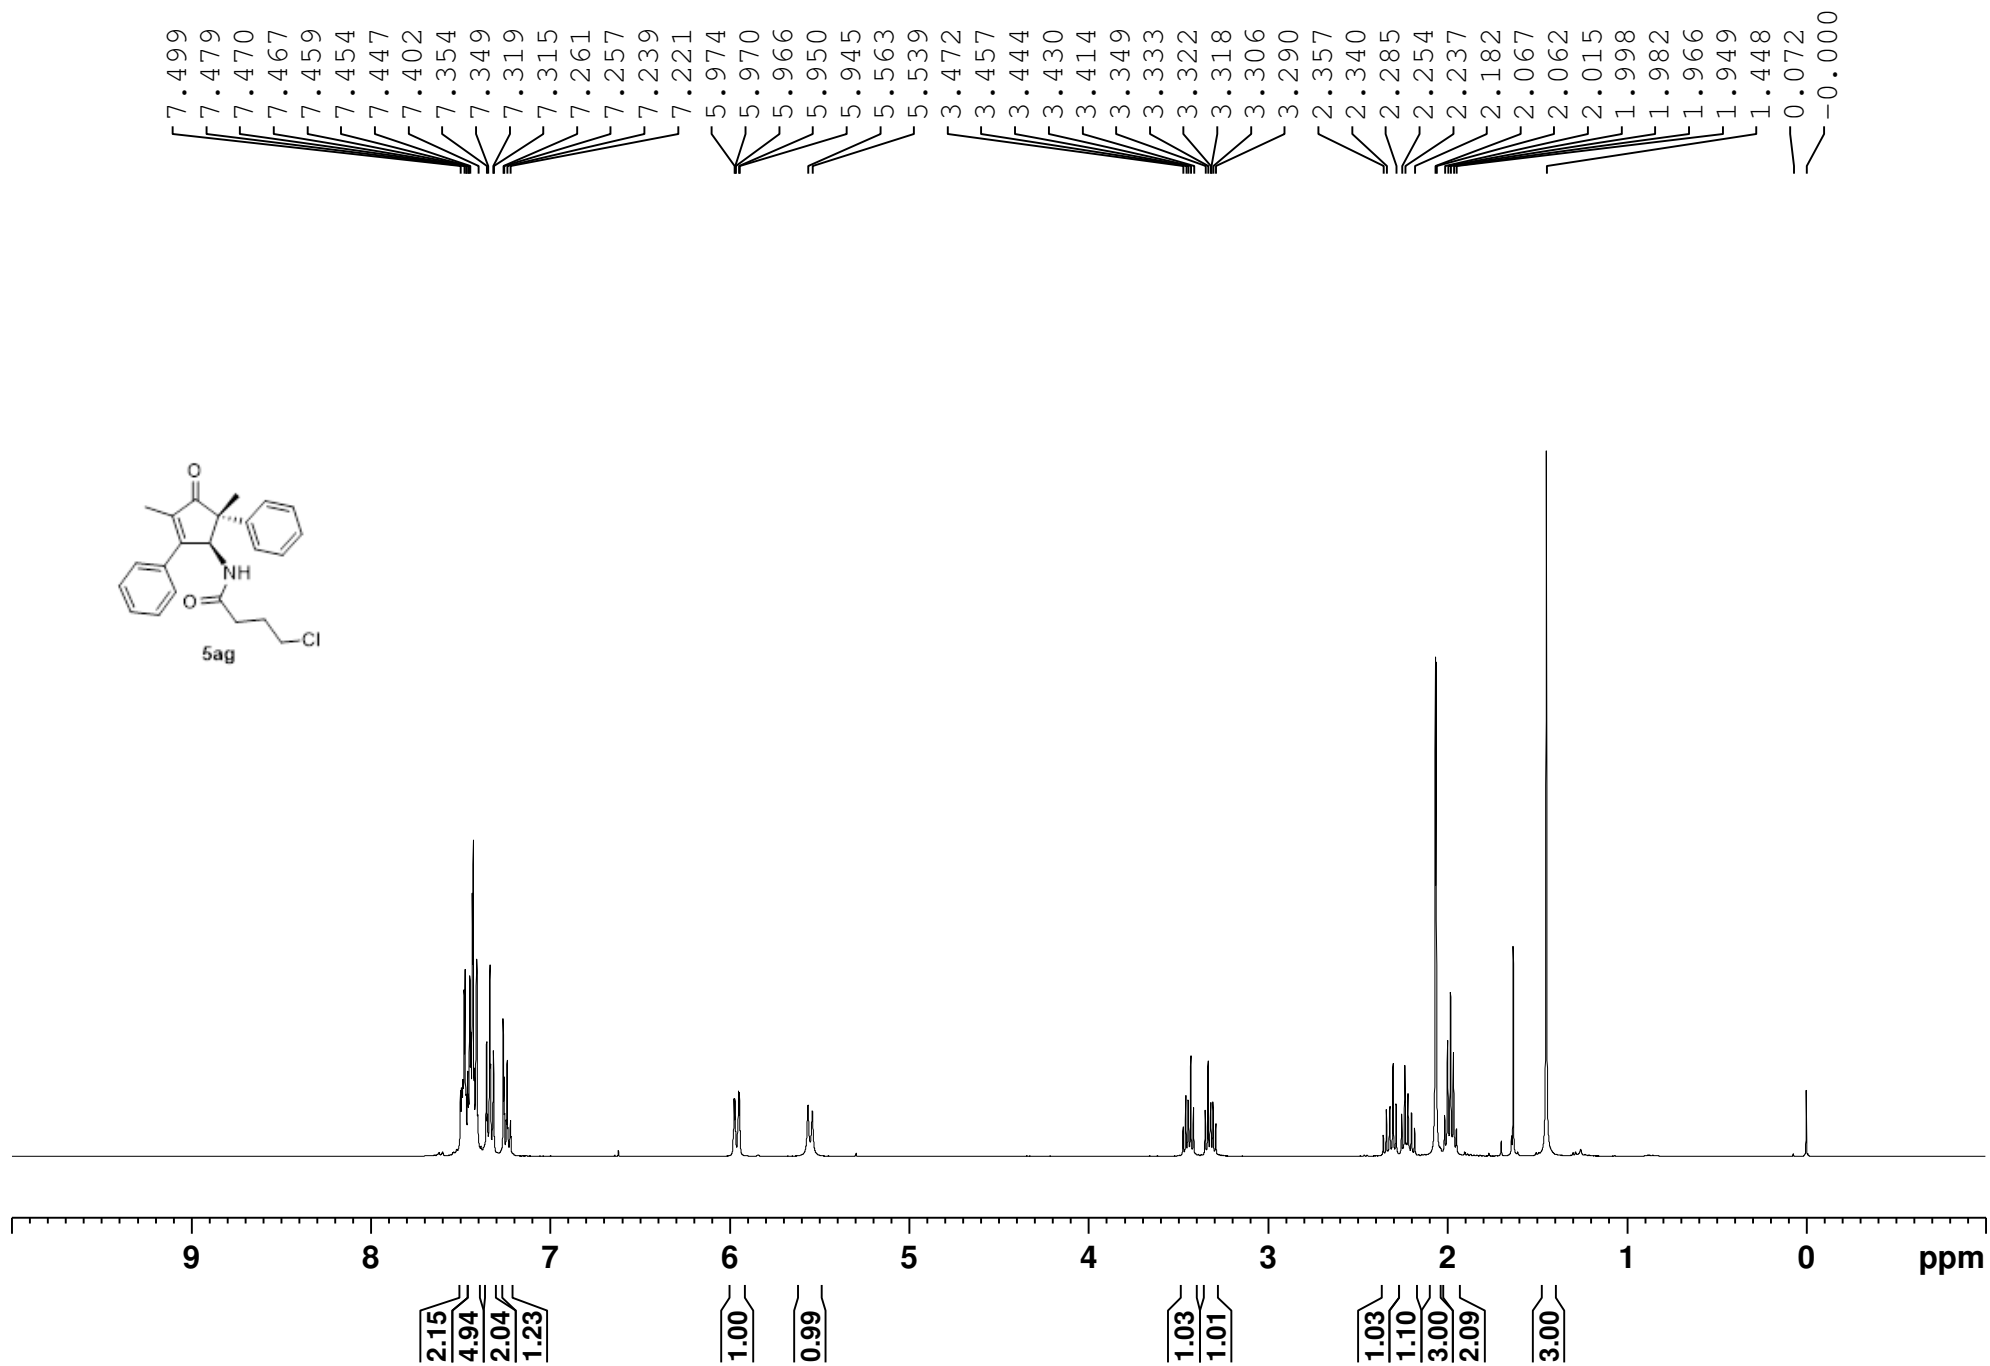

<sup>13</sup>C NMR (100 MHz, CDCl<sub>3</sub>)

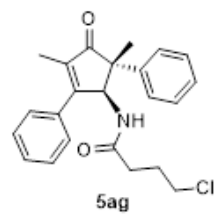

— 209.47

— 171.73

— 162.47

— 143.70  
— 137.11  
— 133.32  
— 130.23  
— 128.93  
— 128.85  
— 128.55  
— 127.08  
— 126.48

— 77.48  
— 77.16  
— 76.84

— 61.02

— 54.57

— 44.19

— 33.15

— 28.04

— 21.01

— 10.58

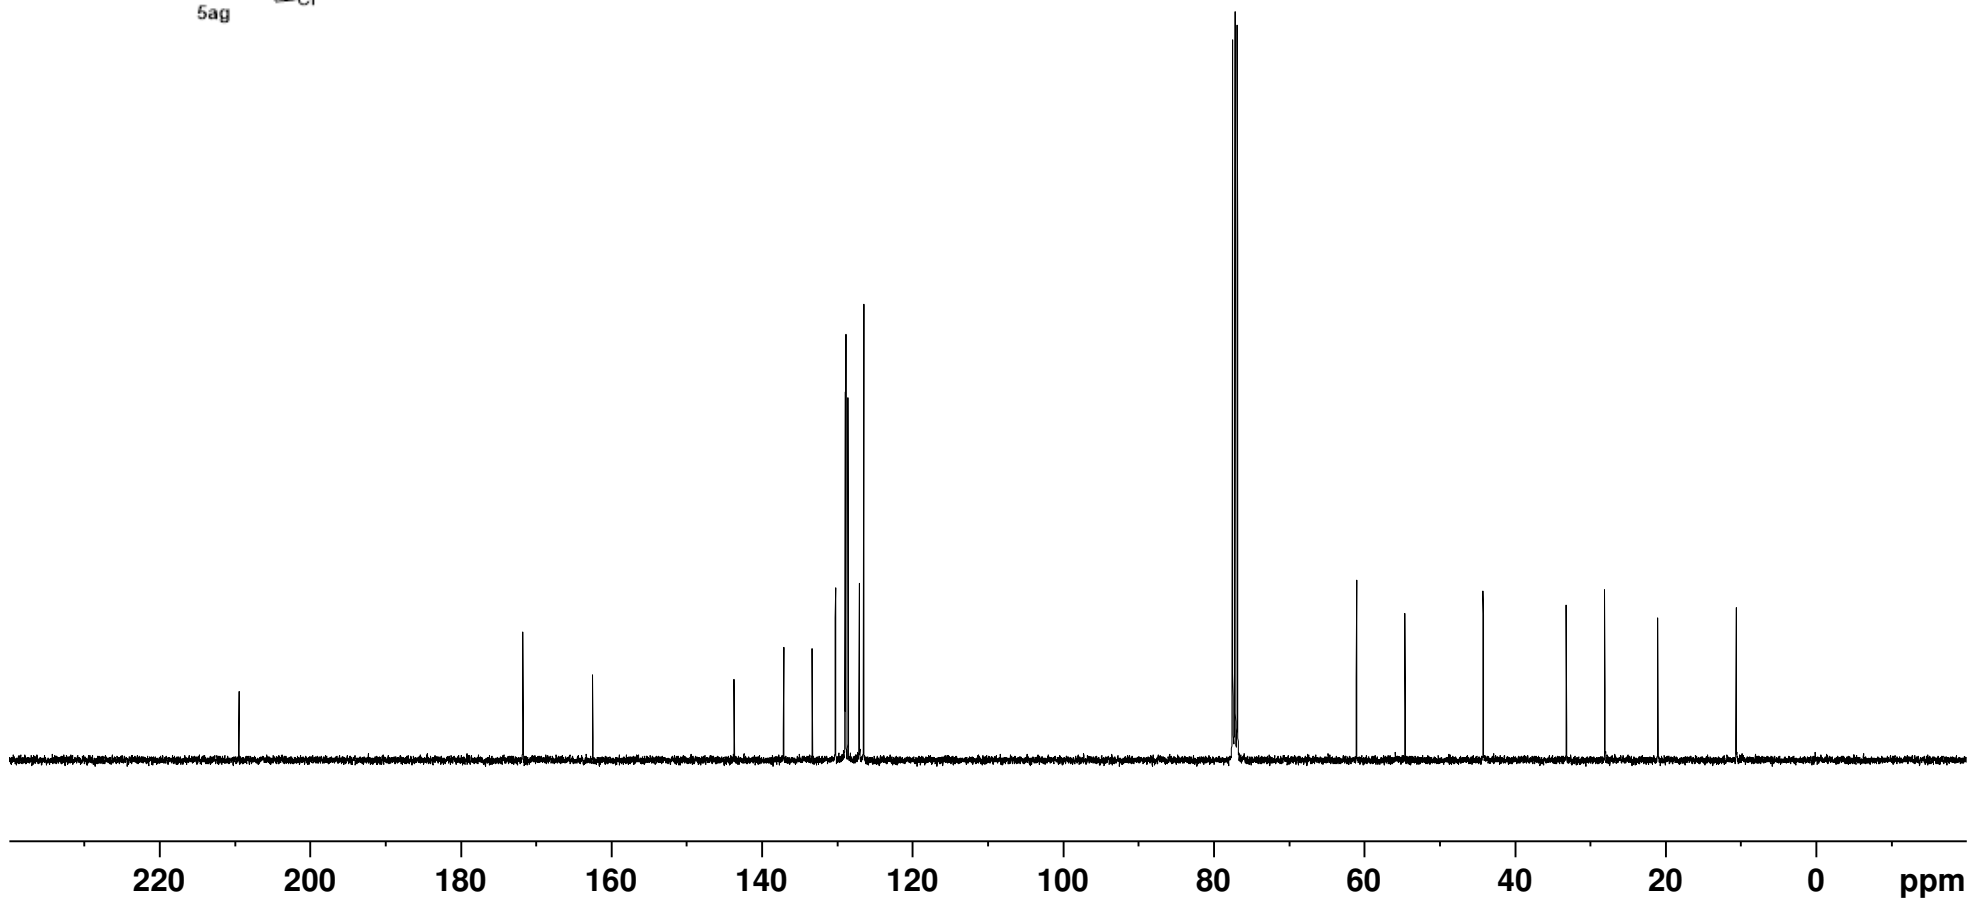

<sup>1</sup>H NMR (400 MHz, CDCl<sub>3</sub>)

7.509  
7.505  
7.489  
7.486  
7.442  
7.427  
7.425  
7.411  
7.398  
7.352  
7.334  
7.314  
7.261  
7.254  
7.236  
7.217  
6.258  
6.216  
6.032  
6.028  
6.007  
5.981  
5.964  
5.939  
5.706  
5.682  
5.615  
5.589

2.084  
2.080

1.444

0.074  
-0.000

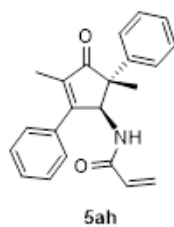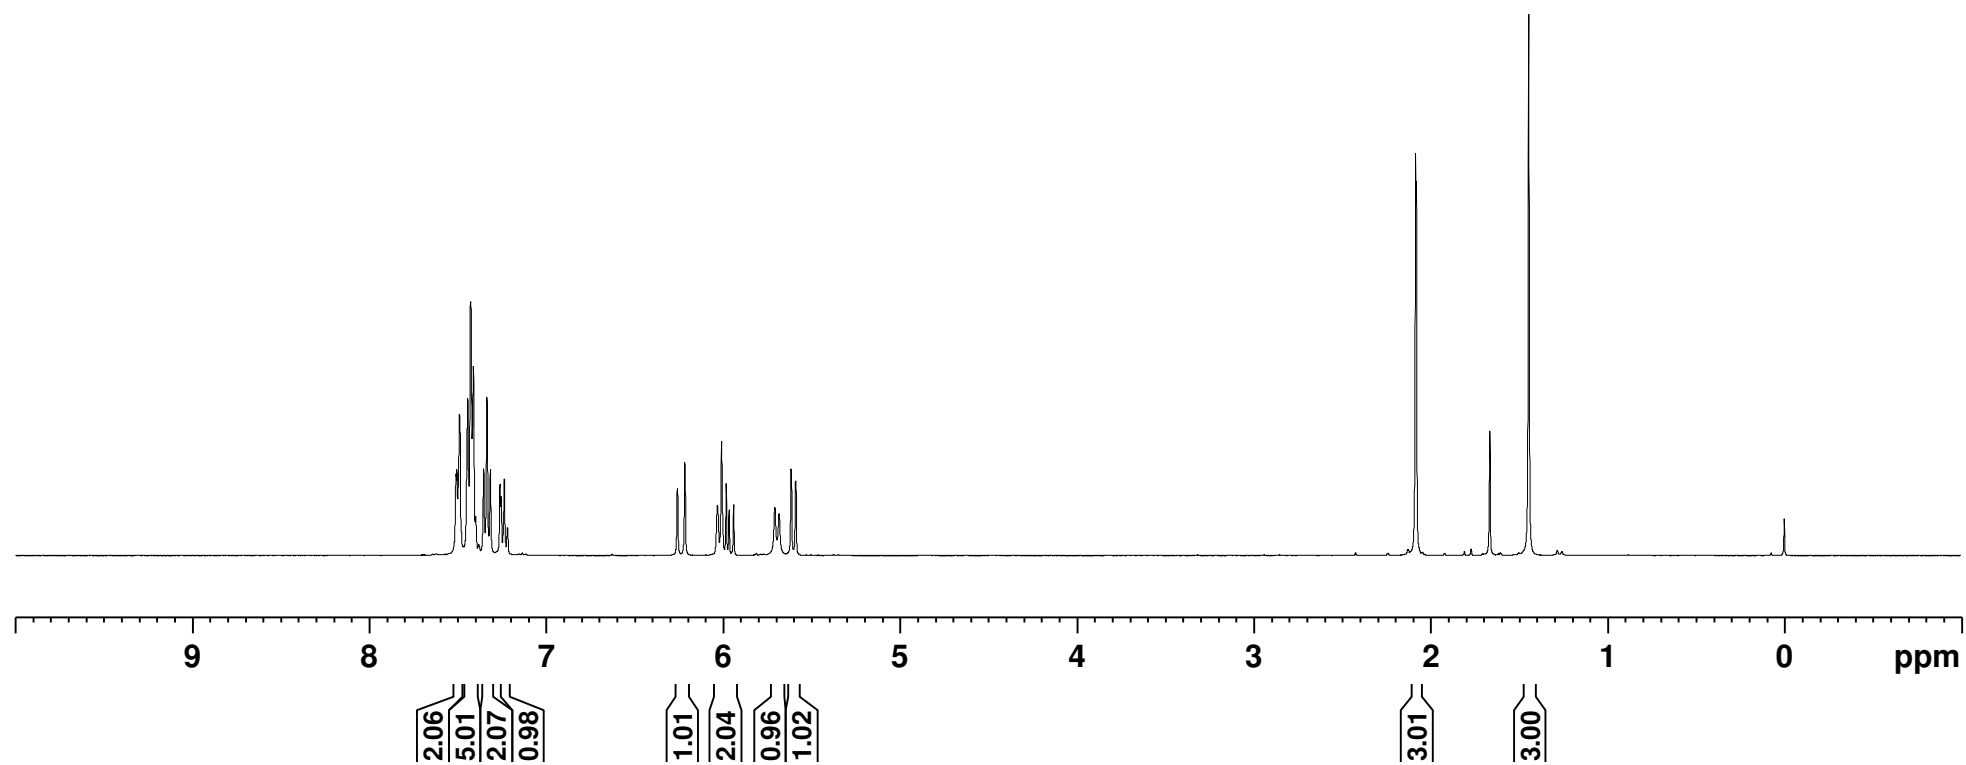

<sup>13</sup>C NMR (100 MHz, CDCl<sub>3</sub>)

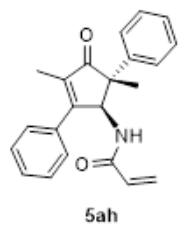

- 209.63
- 165.59
- 162.12
- 143.78
- 137.23
- 133.24
- 130.23
- 130.06
- 128.94
- 128.84
- 128.61
- 127.72
- 127.06
- 126.52
- 77.47
- 77.16
- 76.84
- 61.10
- 54.93
- 20.86
- 10.73

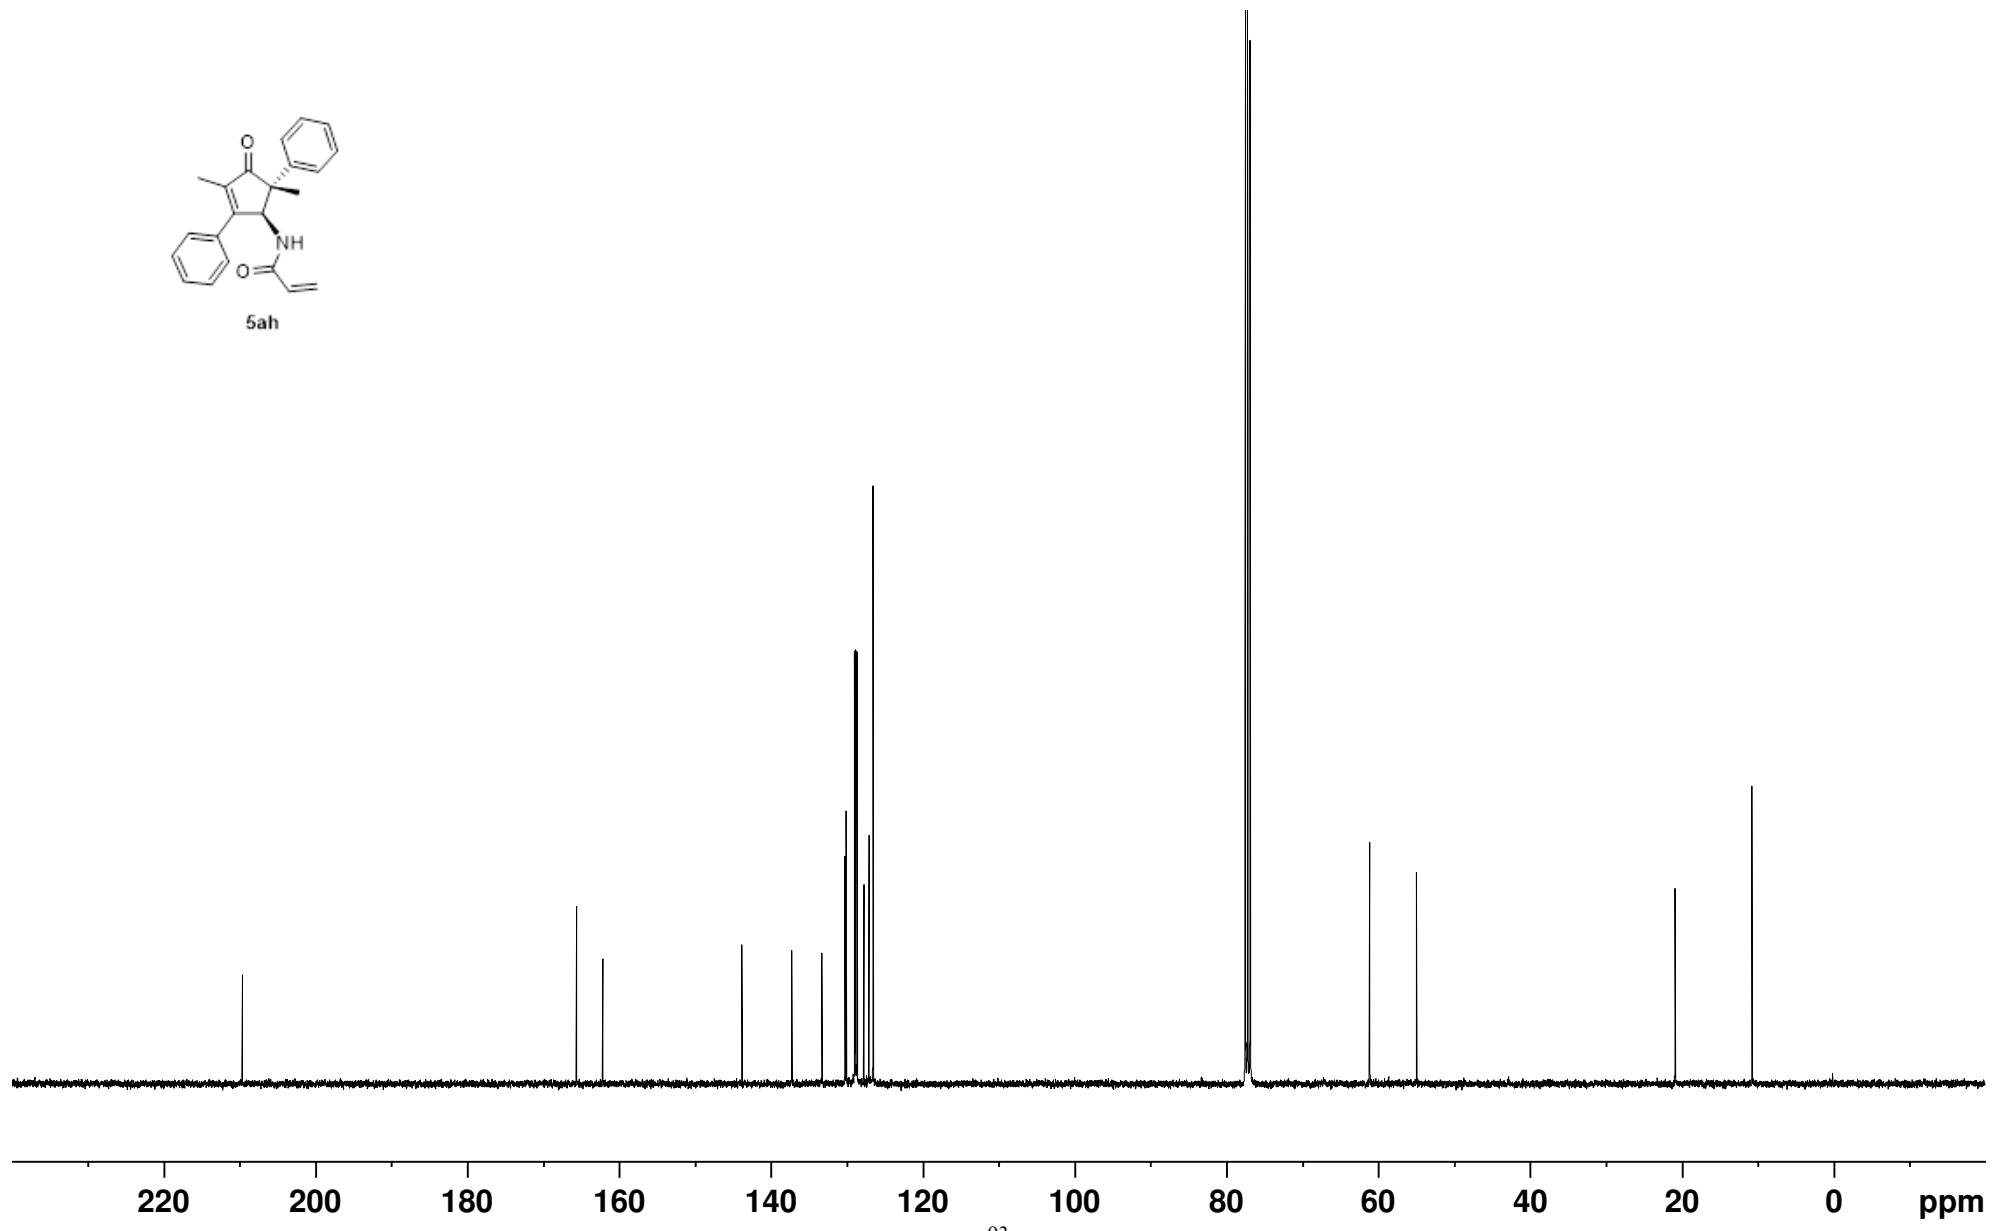

**<sup>1</sup>H NMR (400 MHz, CDCl<sub>3</sub>)**

7.533  
7.528  
7.523  
7.512  
7.509  
7.502  
7.464  
7.459  
7.442  
7.423  
7.417  
7.400  
7.385  
7.382  
7.303  
7.300  
7.283  
7.279  
7.264  
7.237  
7.234  
7.216  
7.201  
7.198  
7.195  
7.147  
7.143  
7.138  
7.125  
5.834  
5.826  
5.823  
5.803  
5.798  
5.784  
5.780  
5.536  
5.510  
5.493  
5.467  
5.382  
5.379  
5.356  
5.353  
4.853  
4.827

2.138  
2.133  
1.789

-0.000

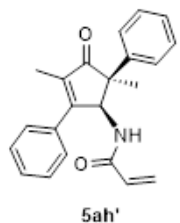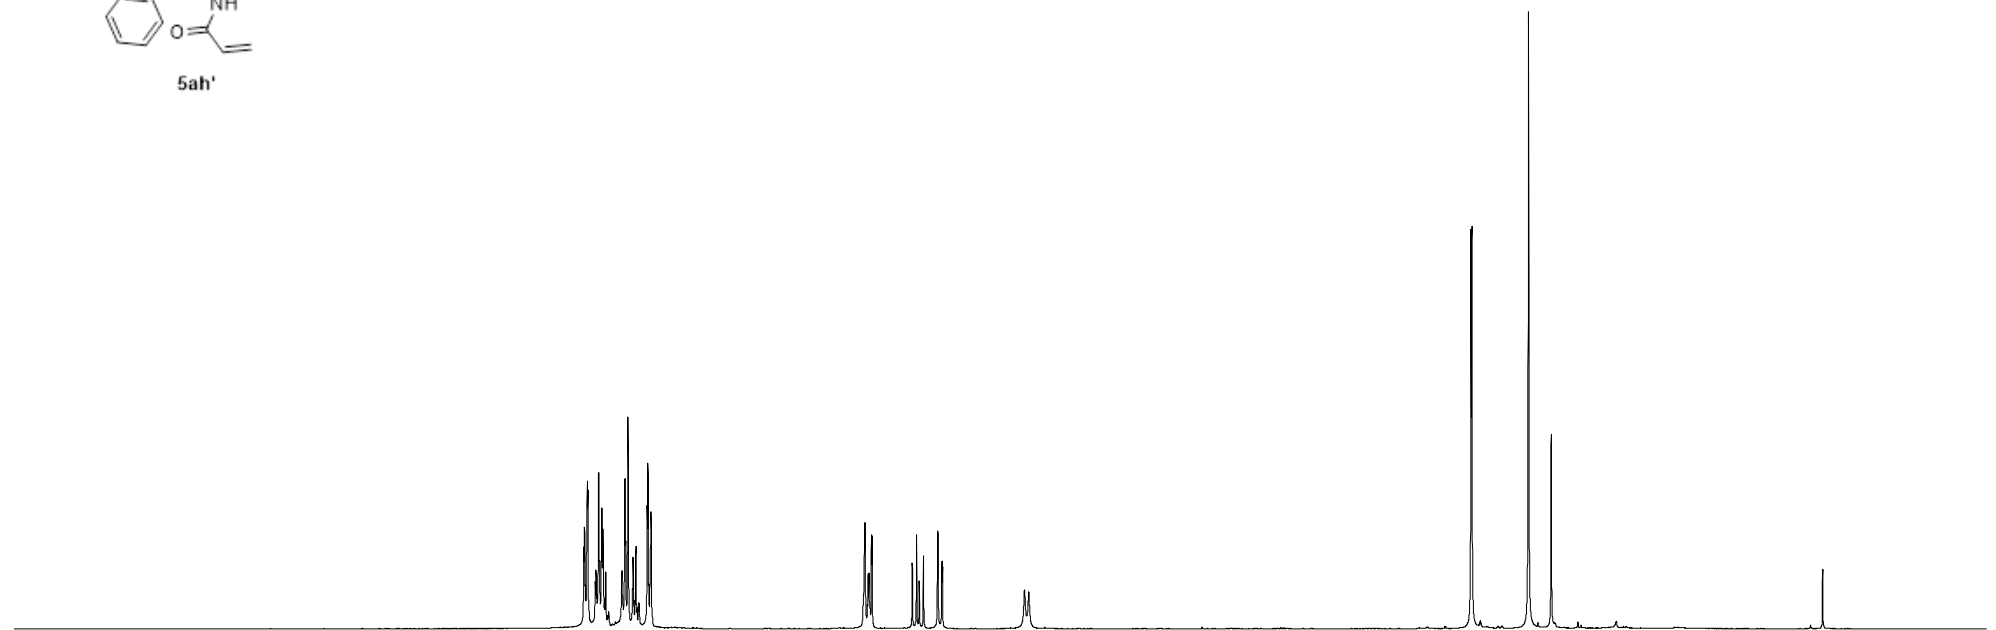

2.05  
3.29  
2.44  
1.13  
2.04

2.08  
1.02  
1.03  
0.98

3.00  
3.00



<sup>13</sup>C NMR (100 MHz, CDCl<sub>3</sub>)

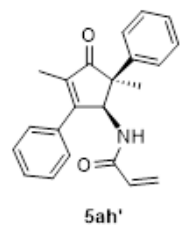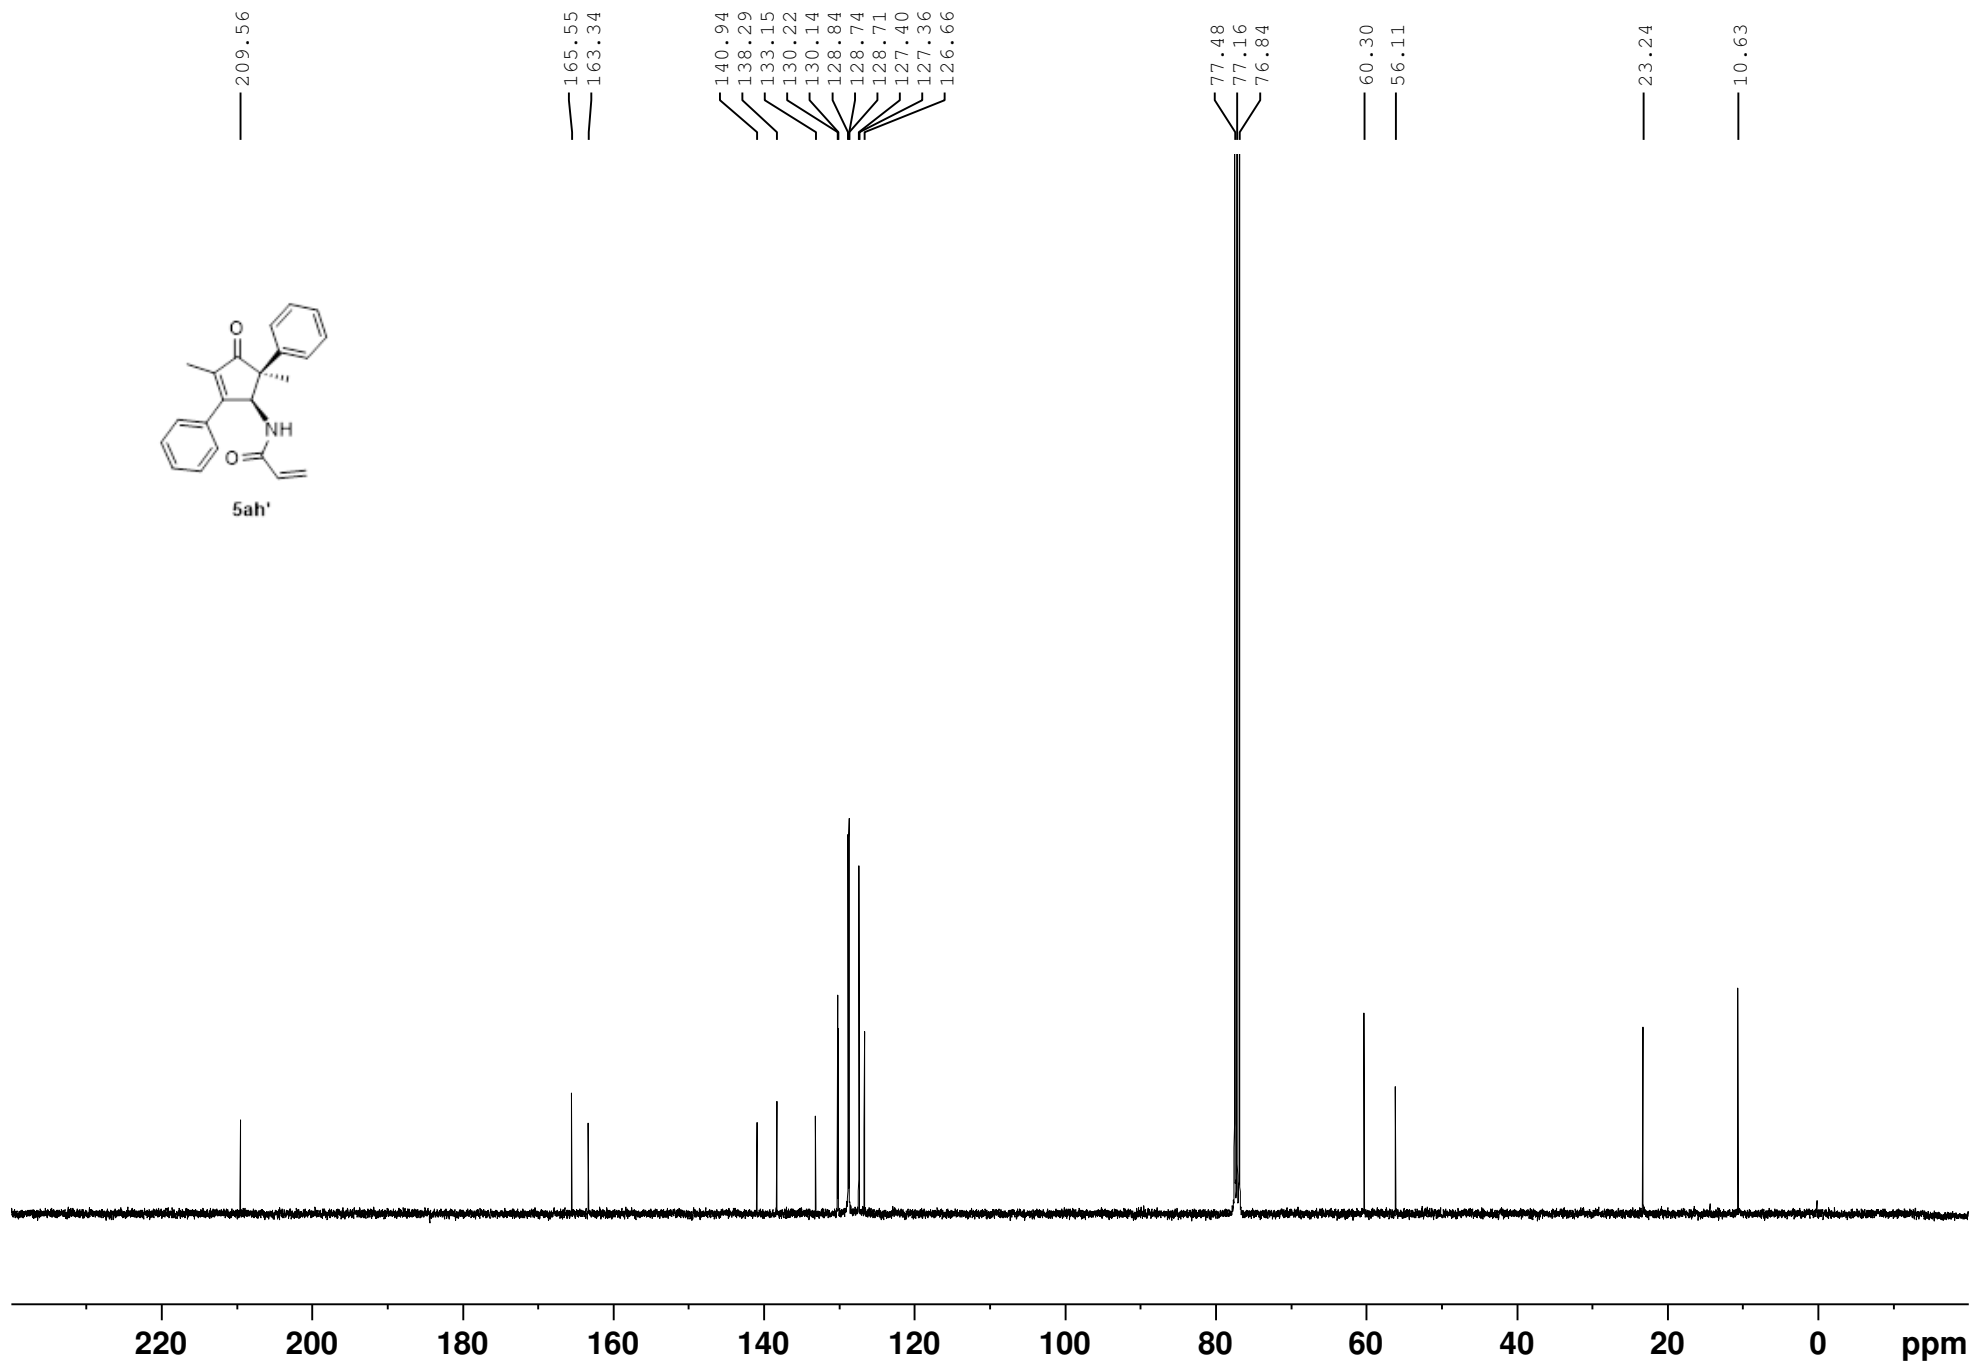

**<sup>1</sup>H NMR (400 MHz, CDCl<sub>3</sub>)**

7.590  
7.578  
7.573  
7.554  
7.547  
7.504  
7.501  
7.483  
7.480  
7.475  
7.461  
7.456  
7.438  
7.405  
7.370  
7.354  
7.351  
7.339  
7.335  
7.272  
7.269  
7.256  
7.251  
7.233  
7.230  
6.169  
6.165  
6.145  
6.141  
6.106  
6.082

< 2.117  
< 2.113

— 1.516

< 0.075  
< -0.000

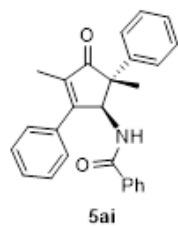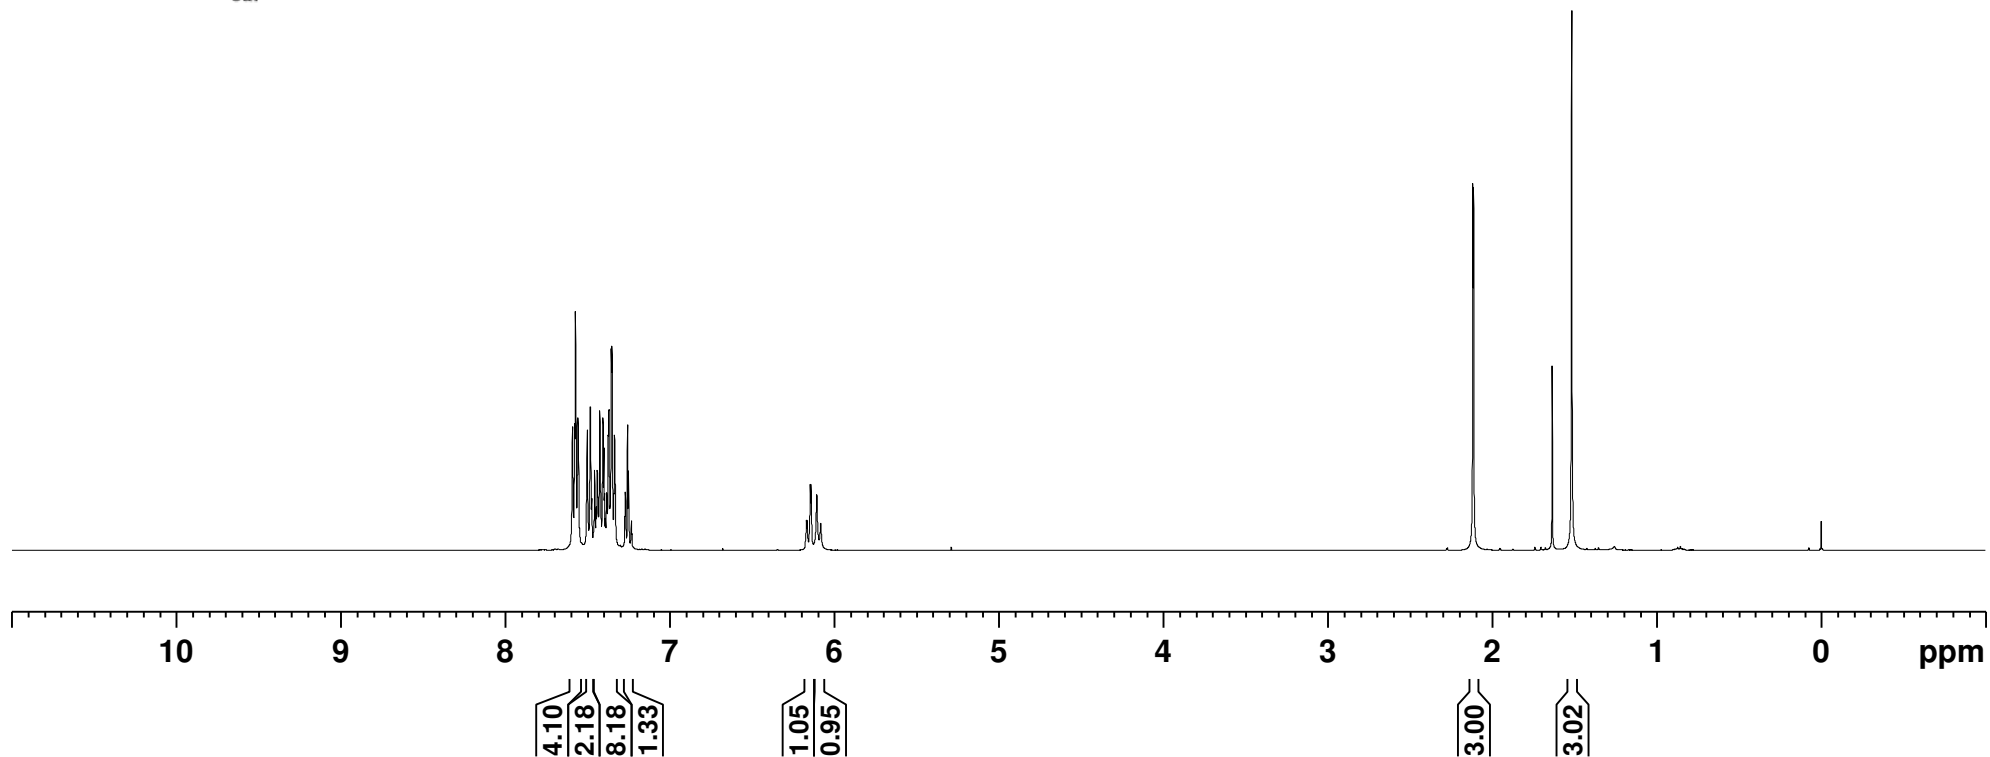

<sup>13</sup>C NMR (100 MHz, CDCl<sub>3</sub>)

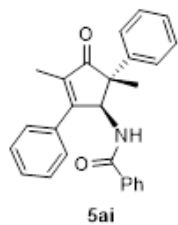

- 209.60
- 167.68
- 162.17
- 143.88
- 137.37
- 134.14
- 133.34
- 131.93
- 130.25
- 128.99
- 128.88
- 128.81
- 128.64
- 127.09
- 126.98
- 126.59
- 77.48
- 77.16
- 76.85
- 61.56
- 55.13
- 20.96
- 10.75

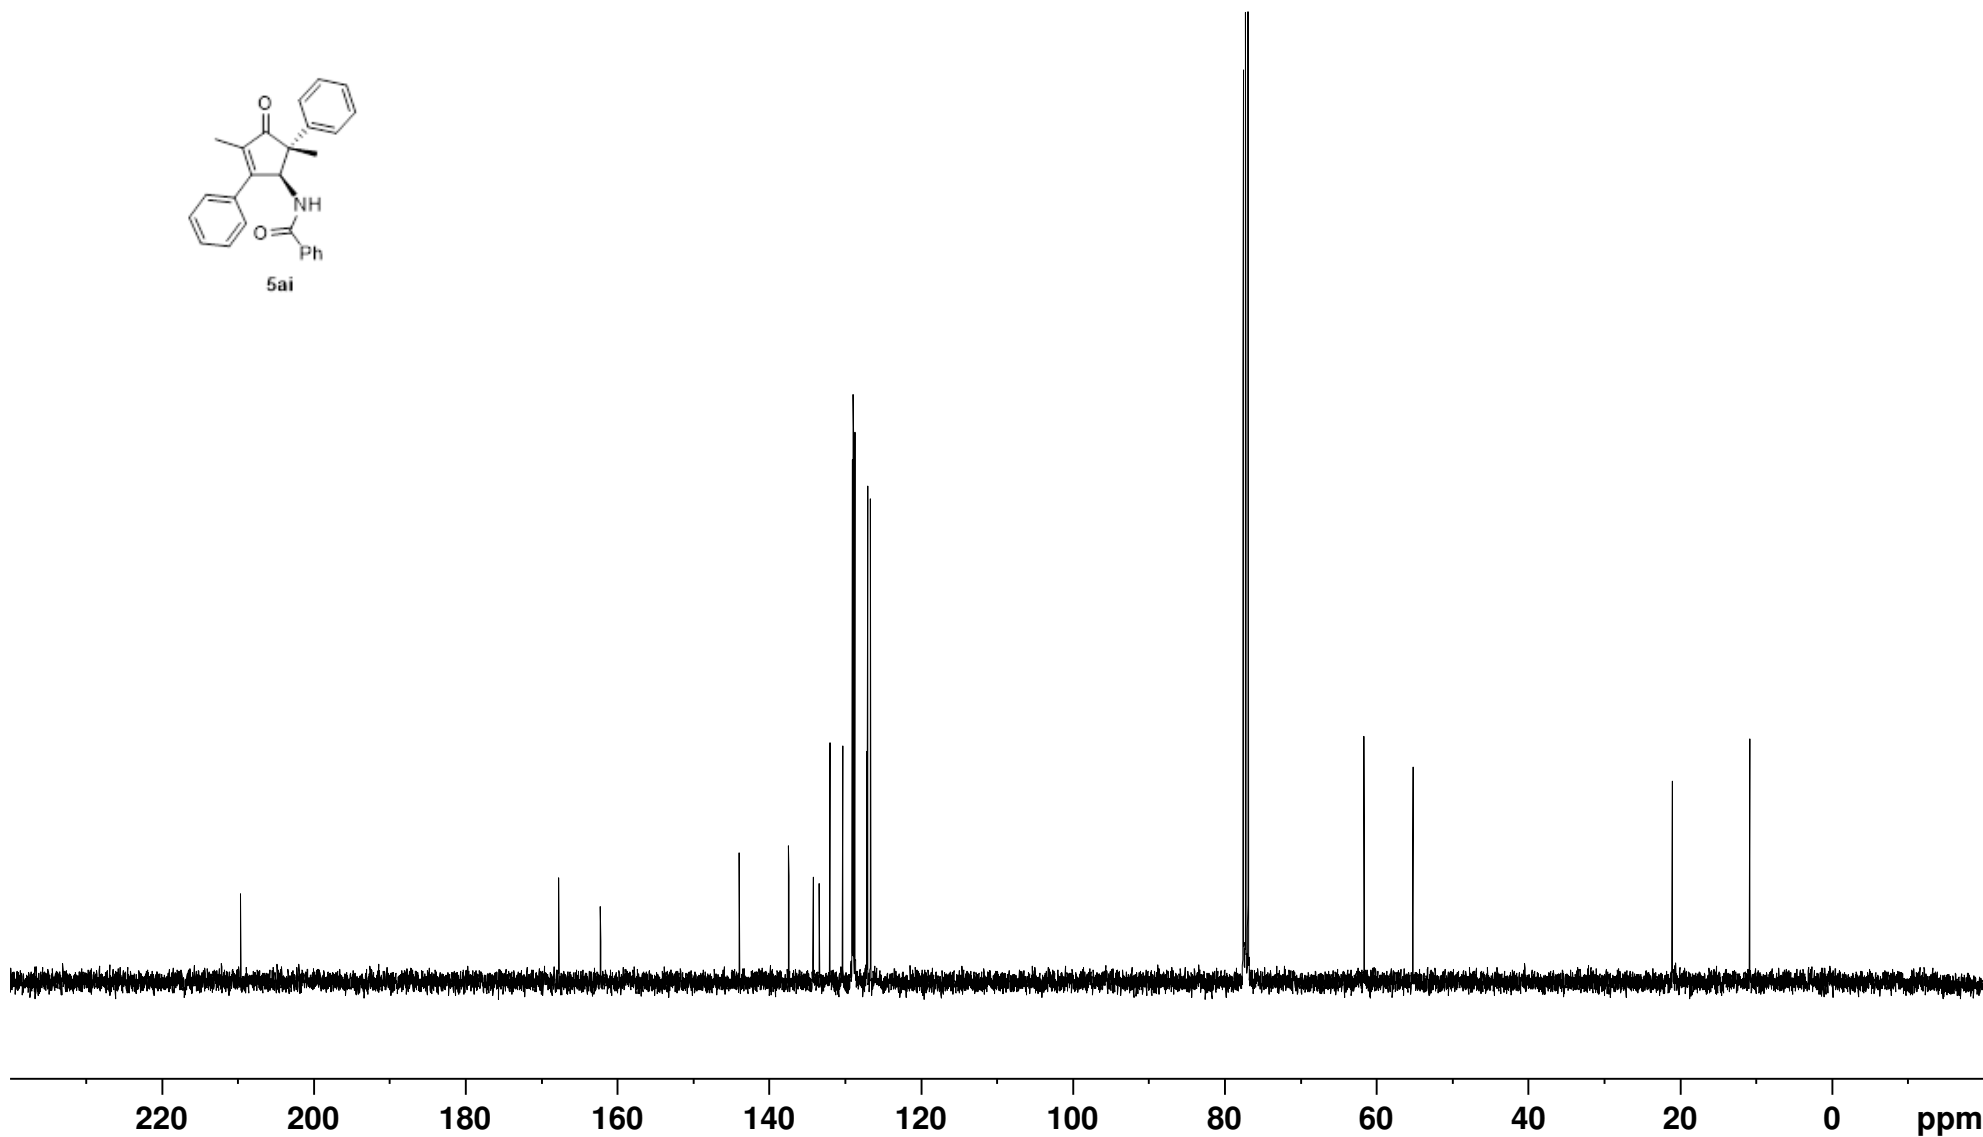

<sup>1</sup>H NMR (600 MHz, CDCl<sub>3</sub>)

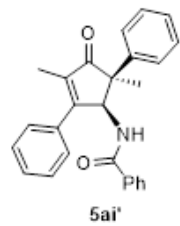

7.592  
7.590  
7.578  
7.442  
7.430  
7.417  
7.390  
7.378  
7.365  
7.333  
7.321  
7.308  
7.295  
7.282  
7.260  
7.243  
7.231  
7.216  
7.214  
7.202  
7.183  
7.170  
7.157  
6.952  
6.940  
6.938  
5.961  
5.957  
5.944  
5.940  
5.331  
5.314

< 2.165  
2.161  
— 1.845

— -0.000

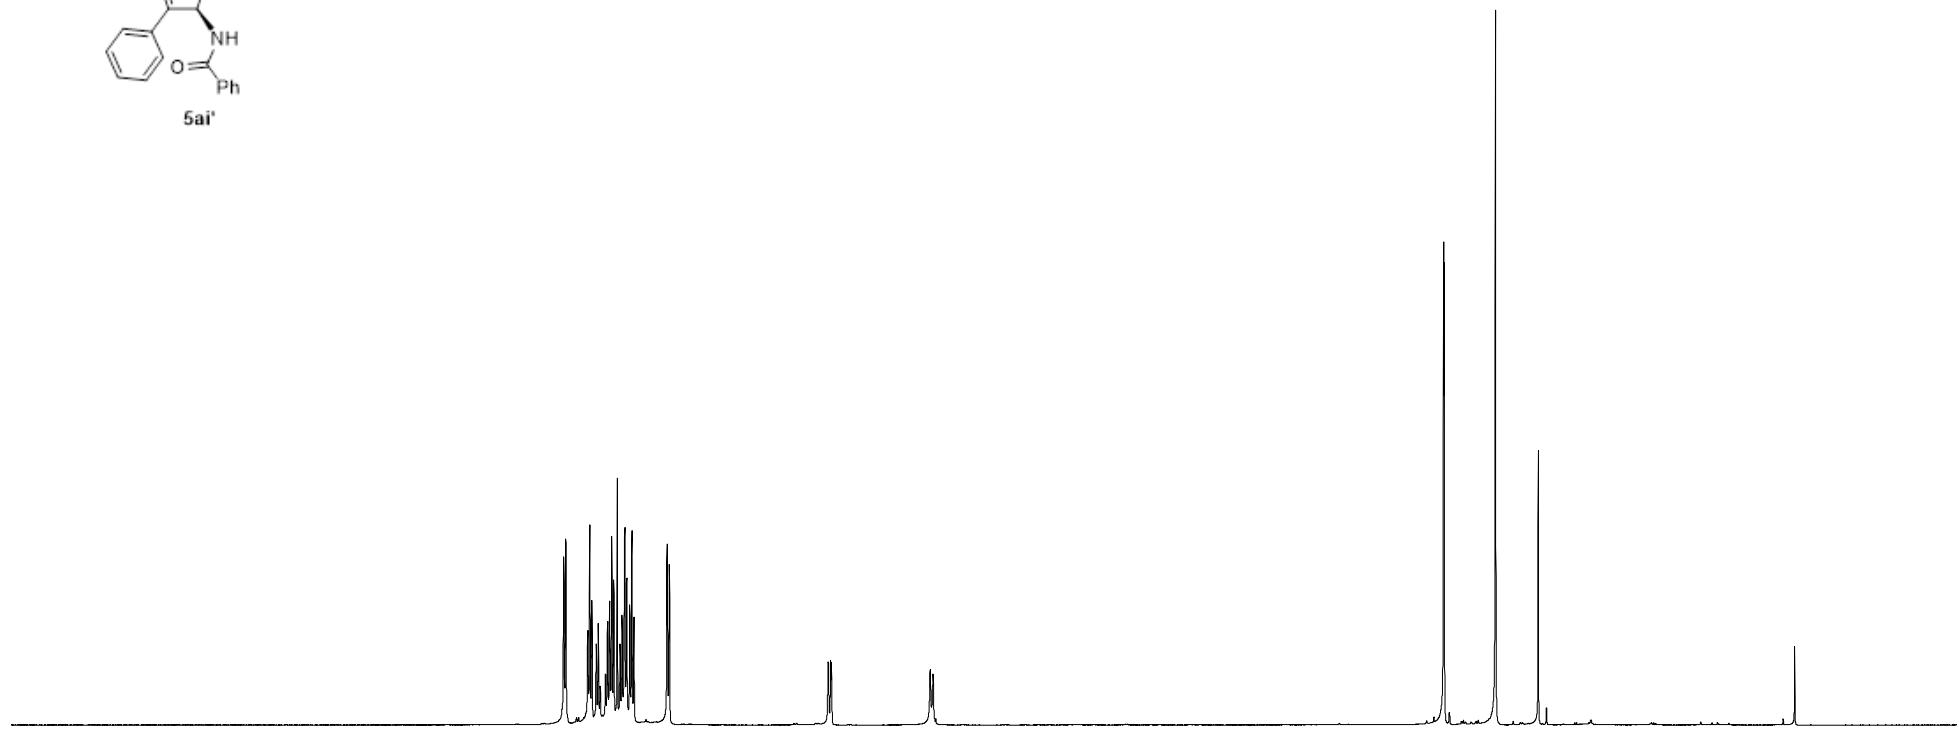

10 9 8 7 6 5 4 3 2 1 0 ppm

2.12  
2.17  
1.14  
3.28  
3.19  
1.98  
1.97

1.01

0.97

2.97  
3.00

<sup>13</sup>C NMR (100 MHz, CDCl<sub>3</sub>)

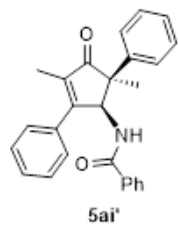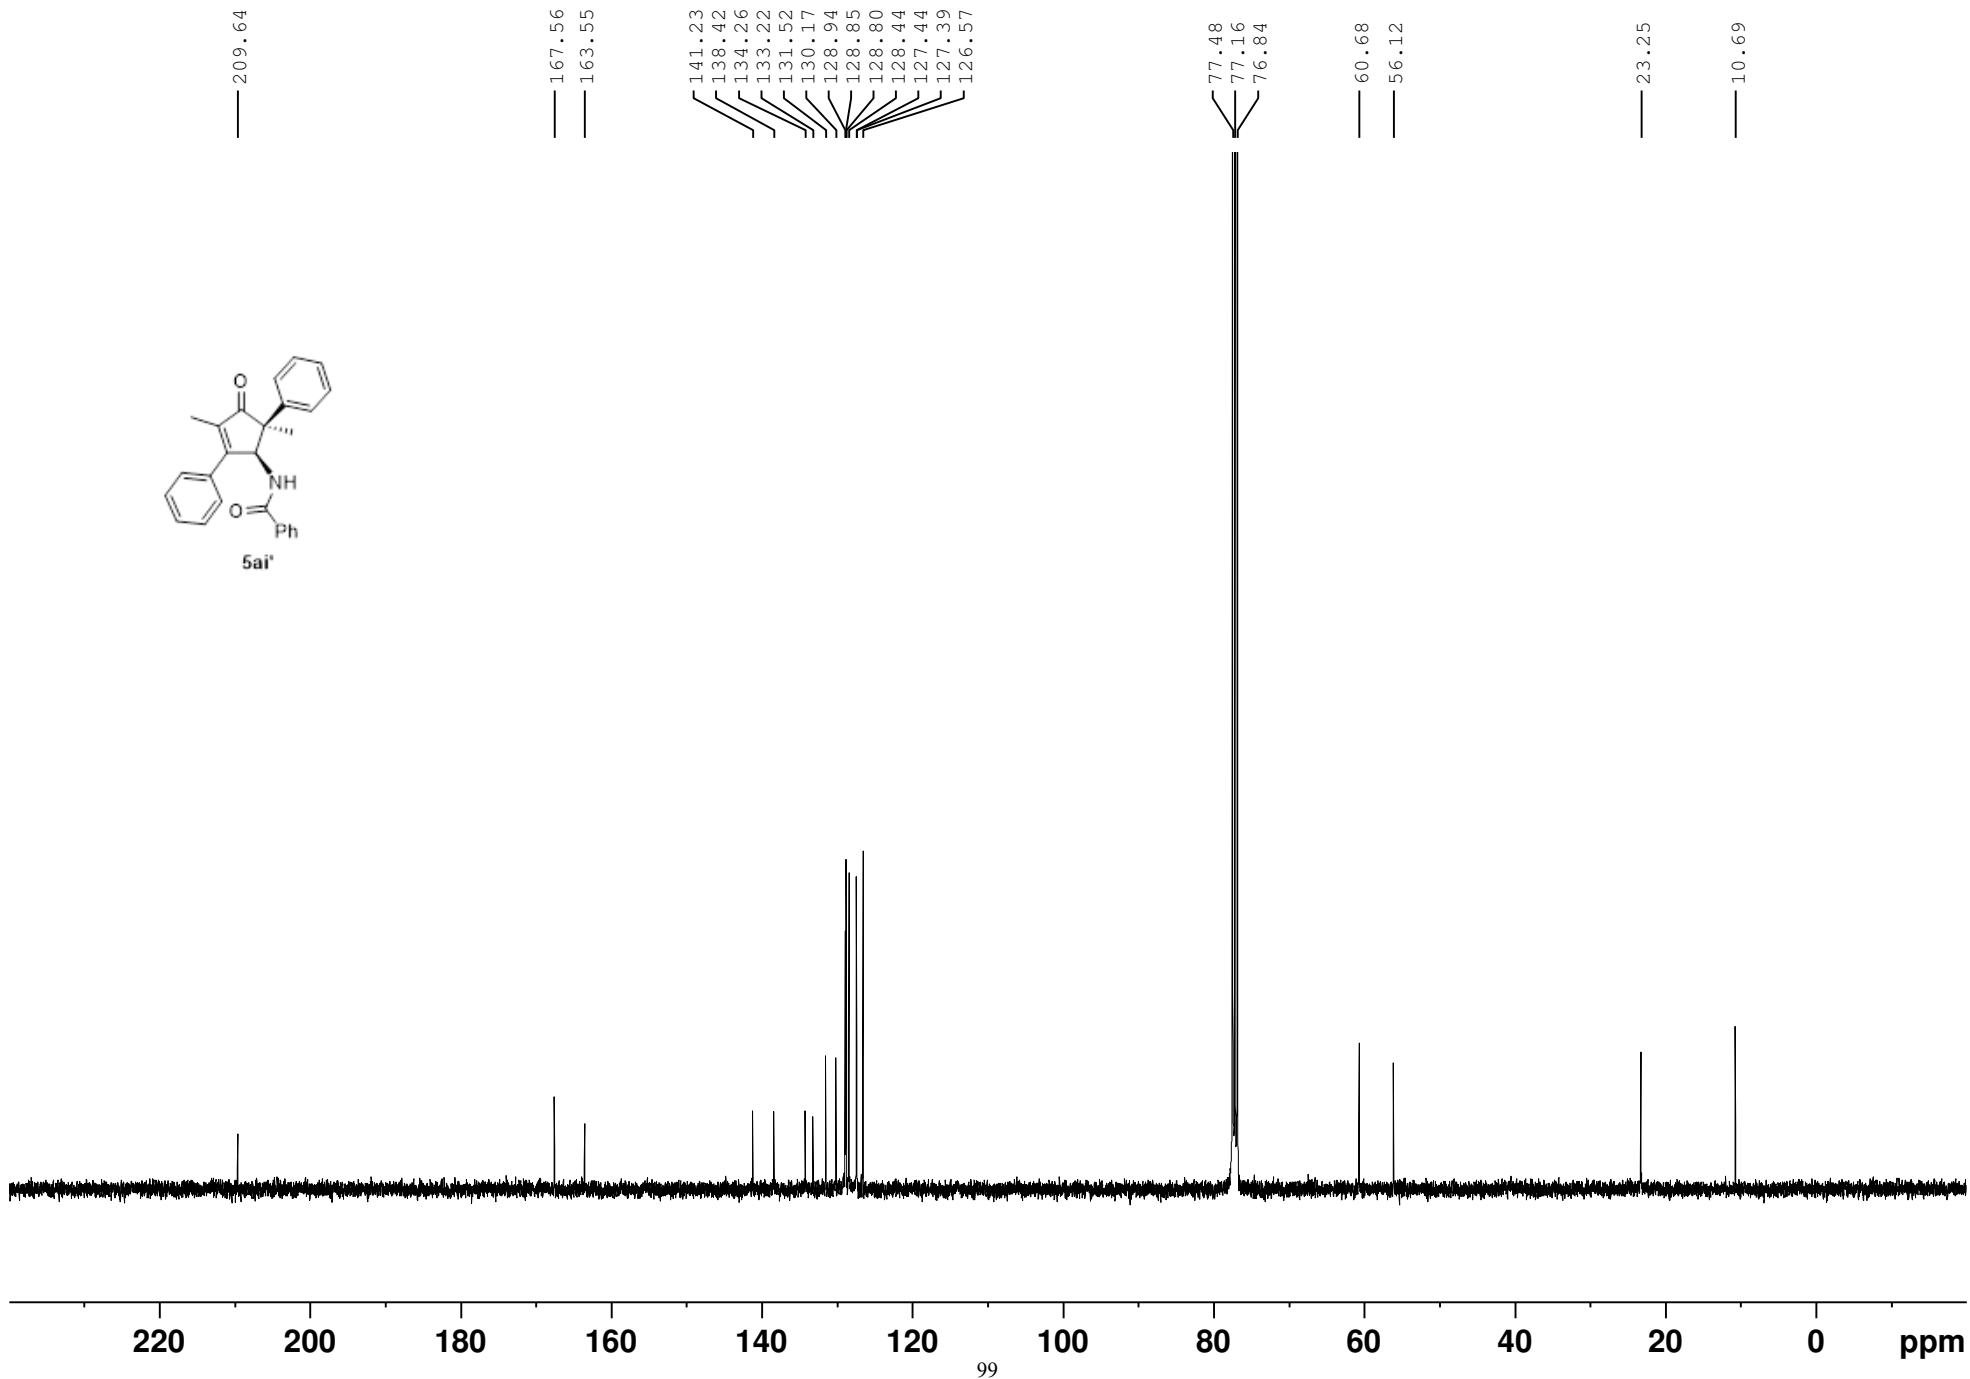

**<sup>1</sup>H NMR (400 MHz, CDCl<sub>3</sub>)**

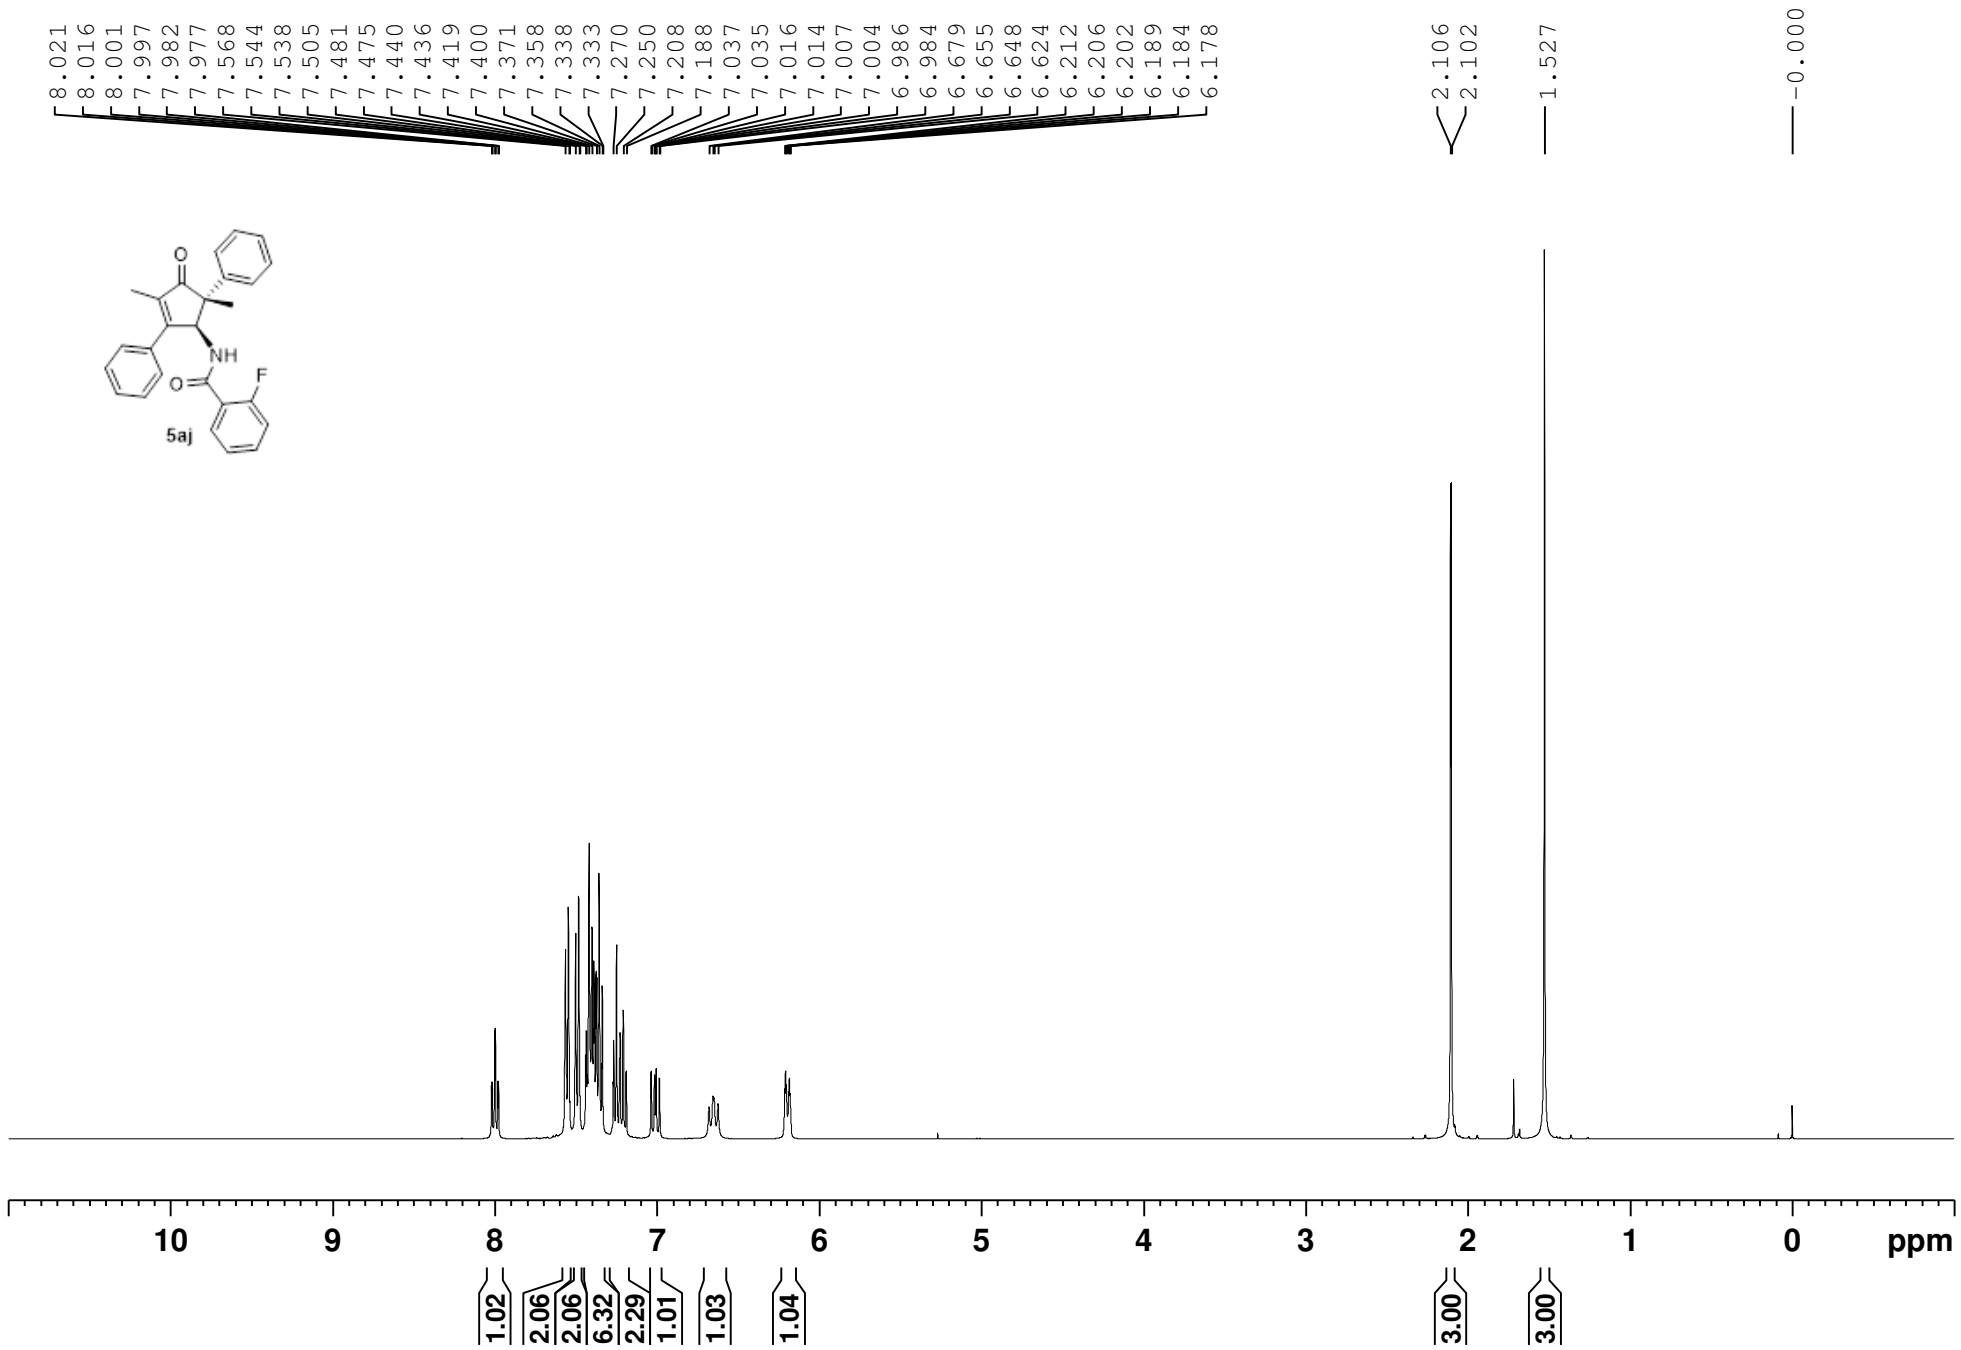

<sup>13</sup>C NMR (100 MHz, CDCl<sub>3</sub>)

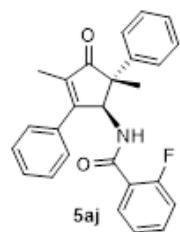

209.41

163.48  
163.45  
162.34  
161.77  
159.32  
143.84  
137.36  
133.71  
133.62  
133.38  
132.11  
132.10  
130.08  
128.87  
128.83  
128.53  
127.03  
126.54  
125.01  
124.98  
120.68  
120.56  
116.26  
116.02

77.48  
77.16  
76.84

61.65  
54.98

20.93  
10.62

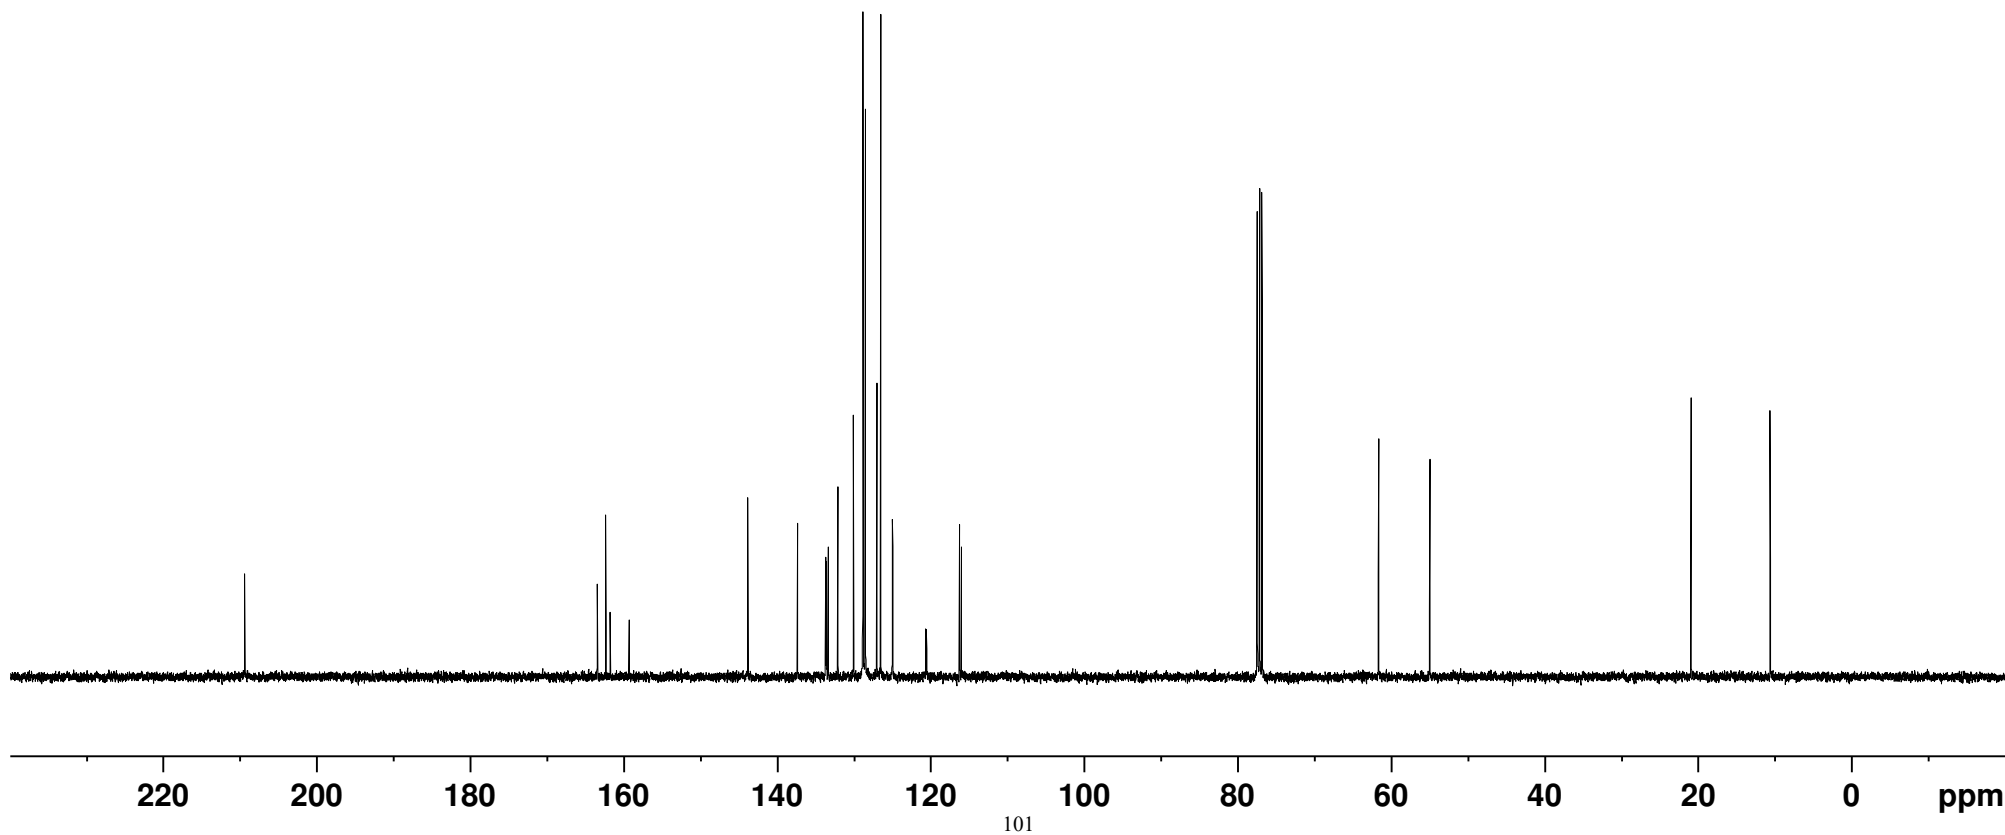

<sup>19</sup>F NMR (376 MHz, CDCl<sub>3</sub>)

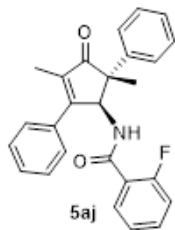

— -113.651

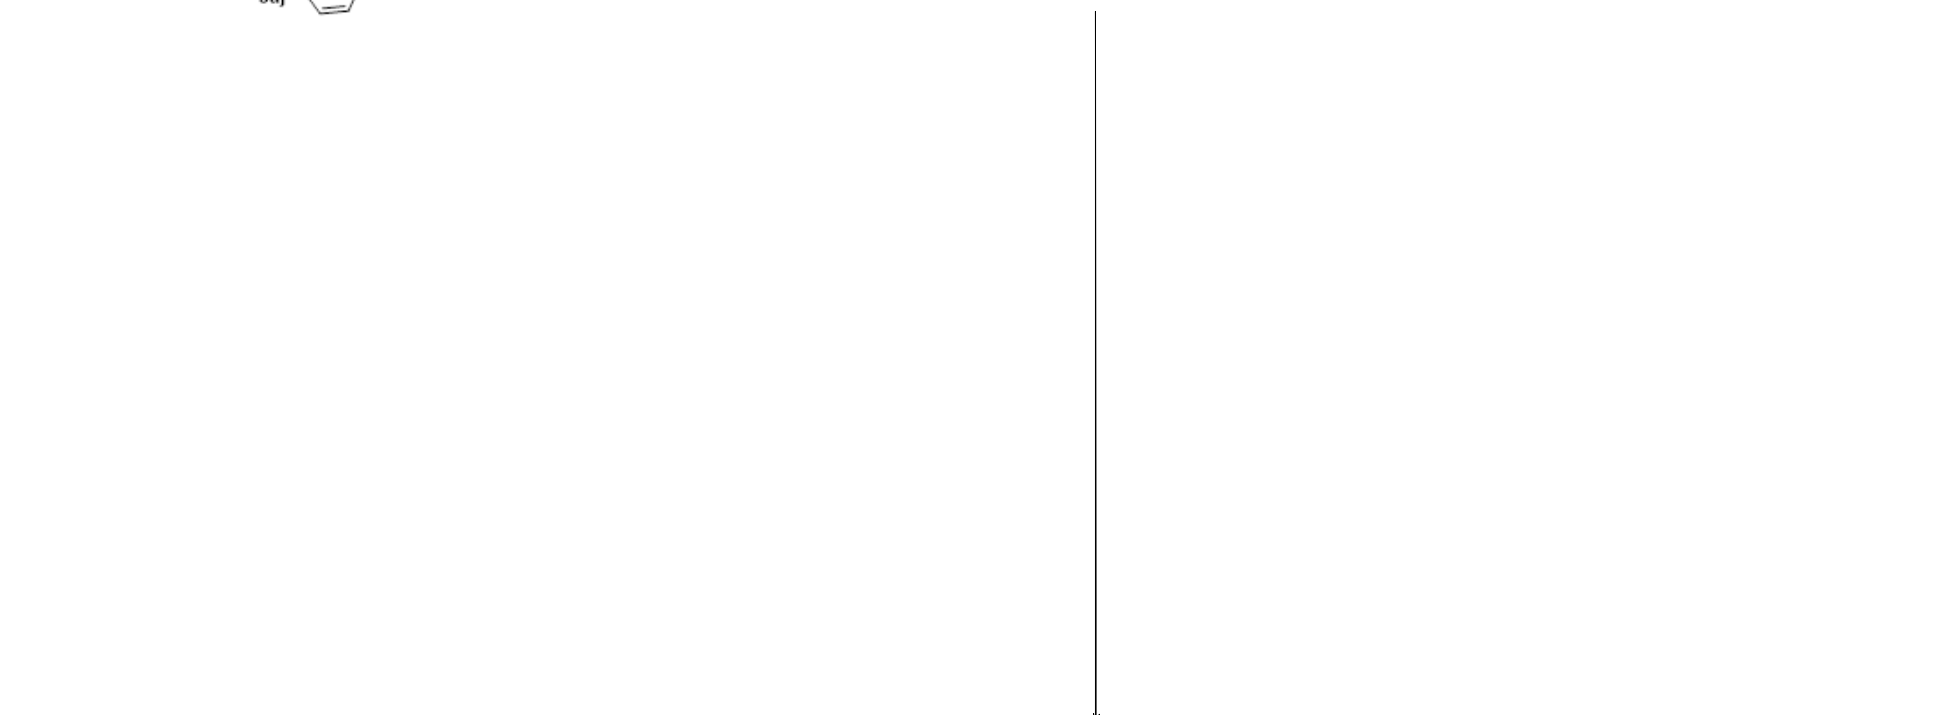

0 -20 -40 -60 -80 -100 -120 -140 -160 -180 -200 ppm



<sup>1</sup>H NMR (400 MHz, CDCl<sub>3</sub>)

7.729  
7.725  
7.710  
7.705  
7.690  
7.686  
7.577  
7.573  
7.556  
7.450  
7.432  
7.378  
7.314  
7.289  
7.284  
7.261  
7.236  
7.218  
7.189  
7.158  
7.141  
7.114  
7.097  
7.076  
6.823  
6.801  
6.793  
6.772  
5.974  
5.959  
5.933

— 2.144  
— 1.852

— -0.000

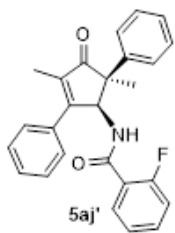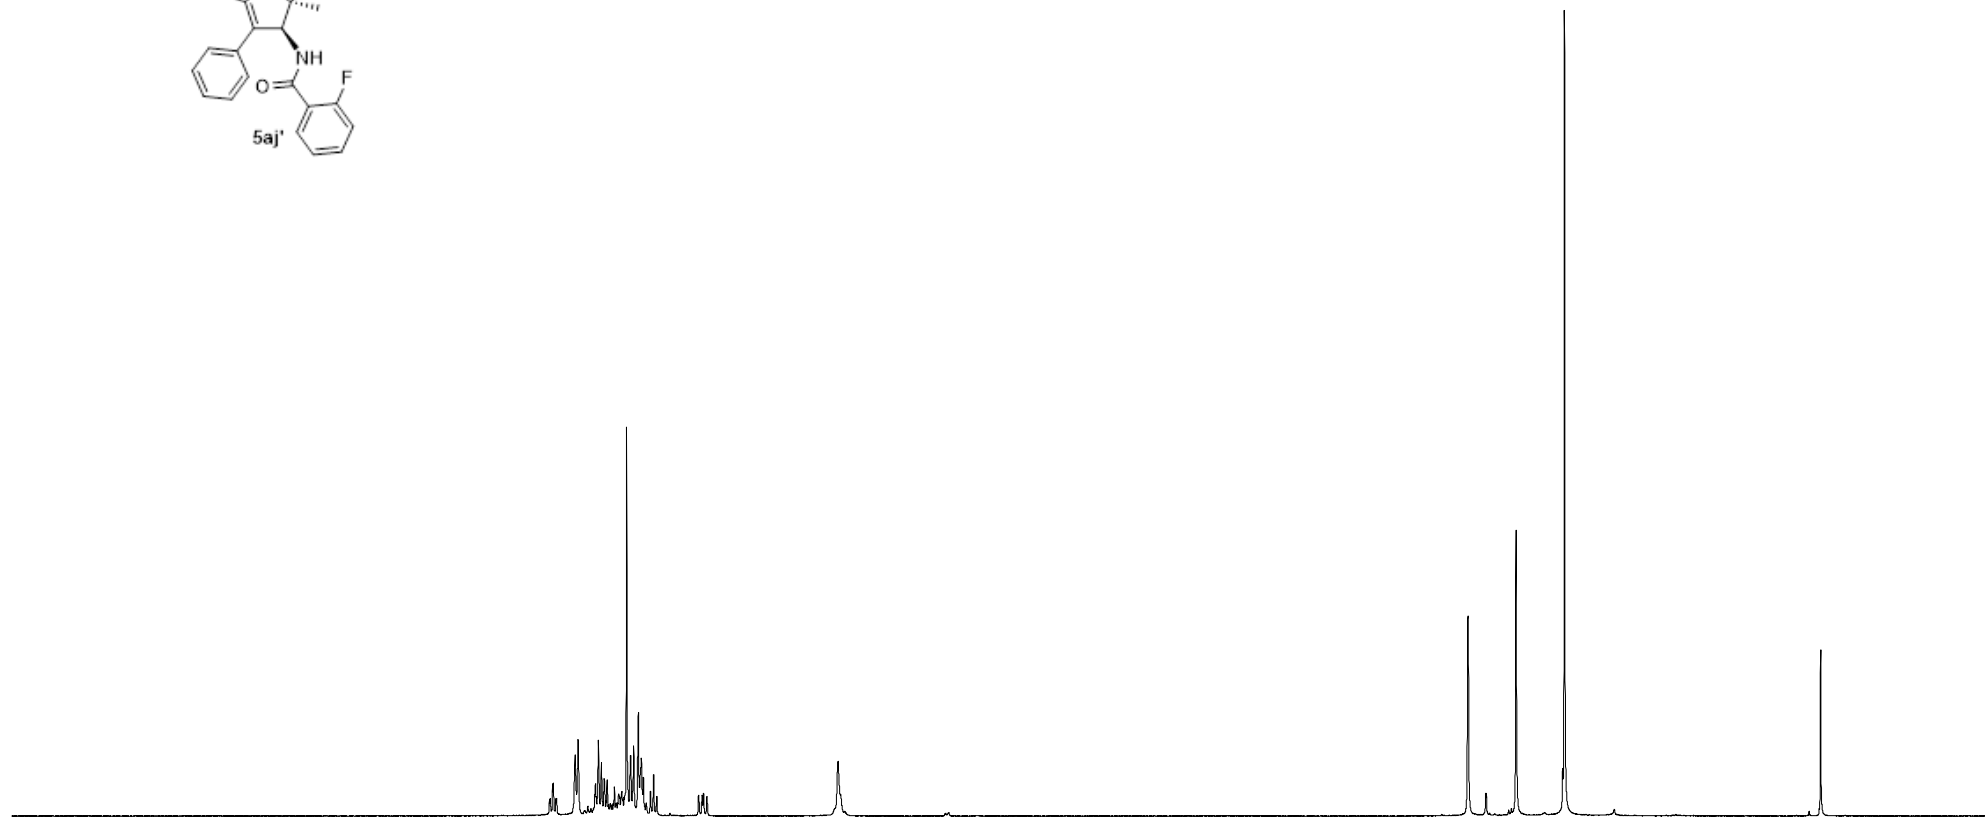

1.10  
2.39  
3.23  
1.03  
1.91  
3.15  
1.06  
1.02

1.92

3.00  
2.99

<sup>13</sup>C NMR (100 MHz, CDCl<sub>3</sub>)

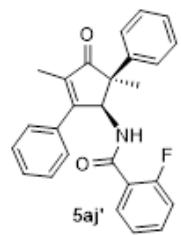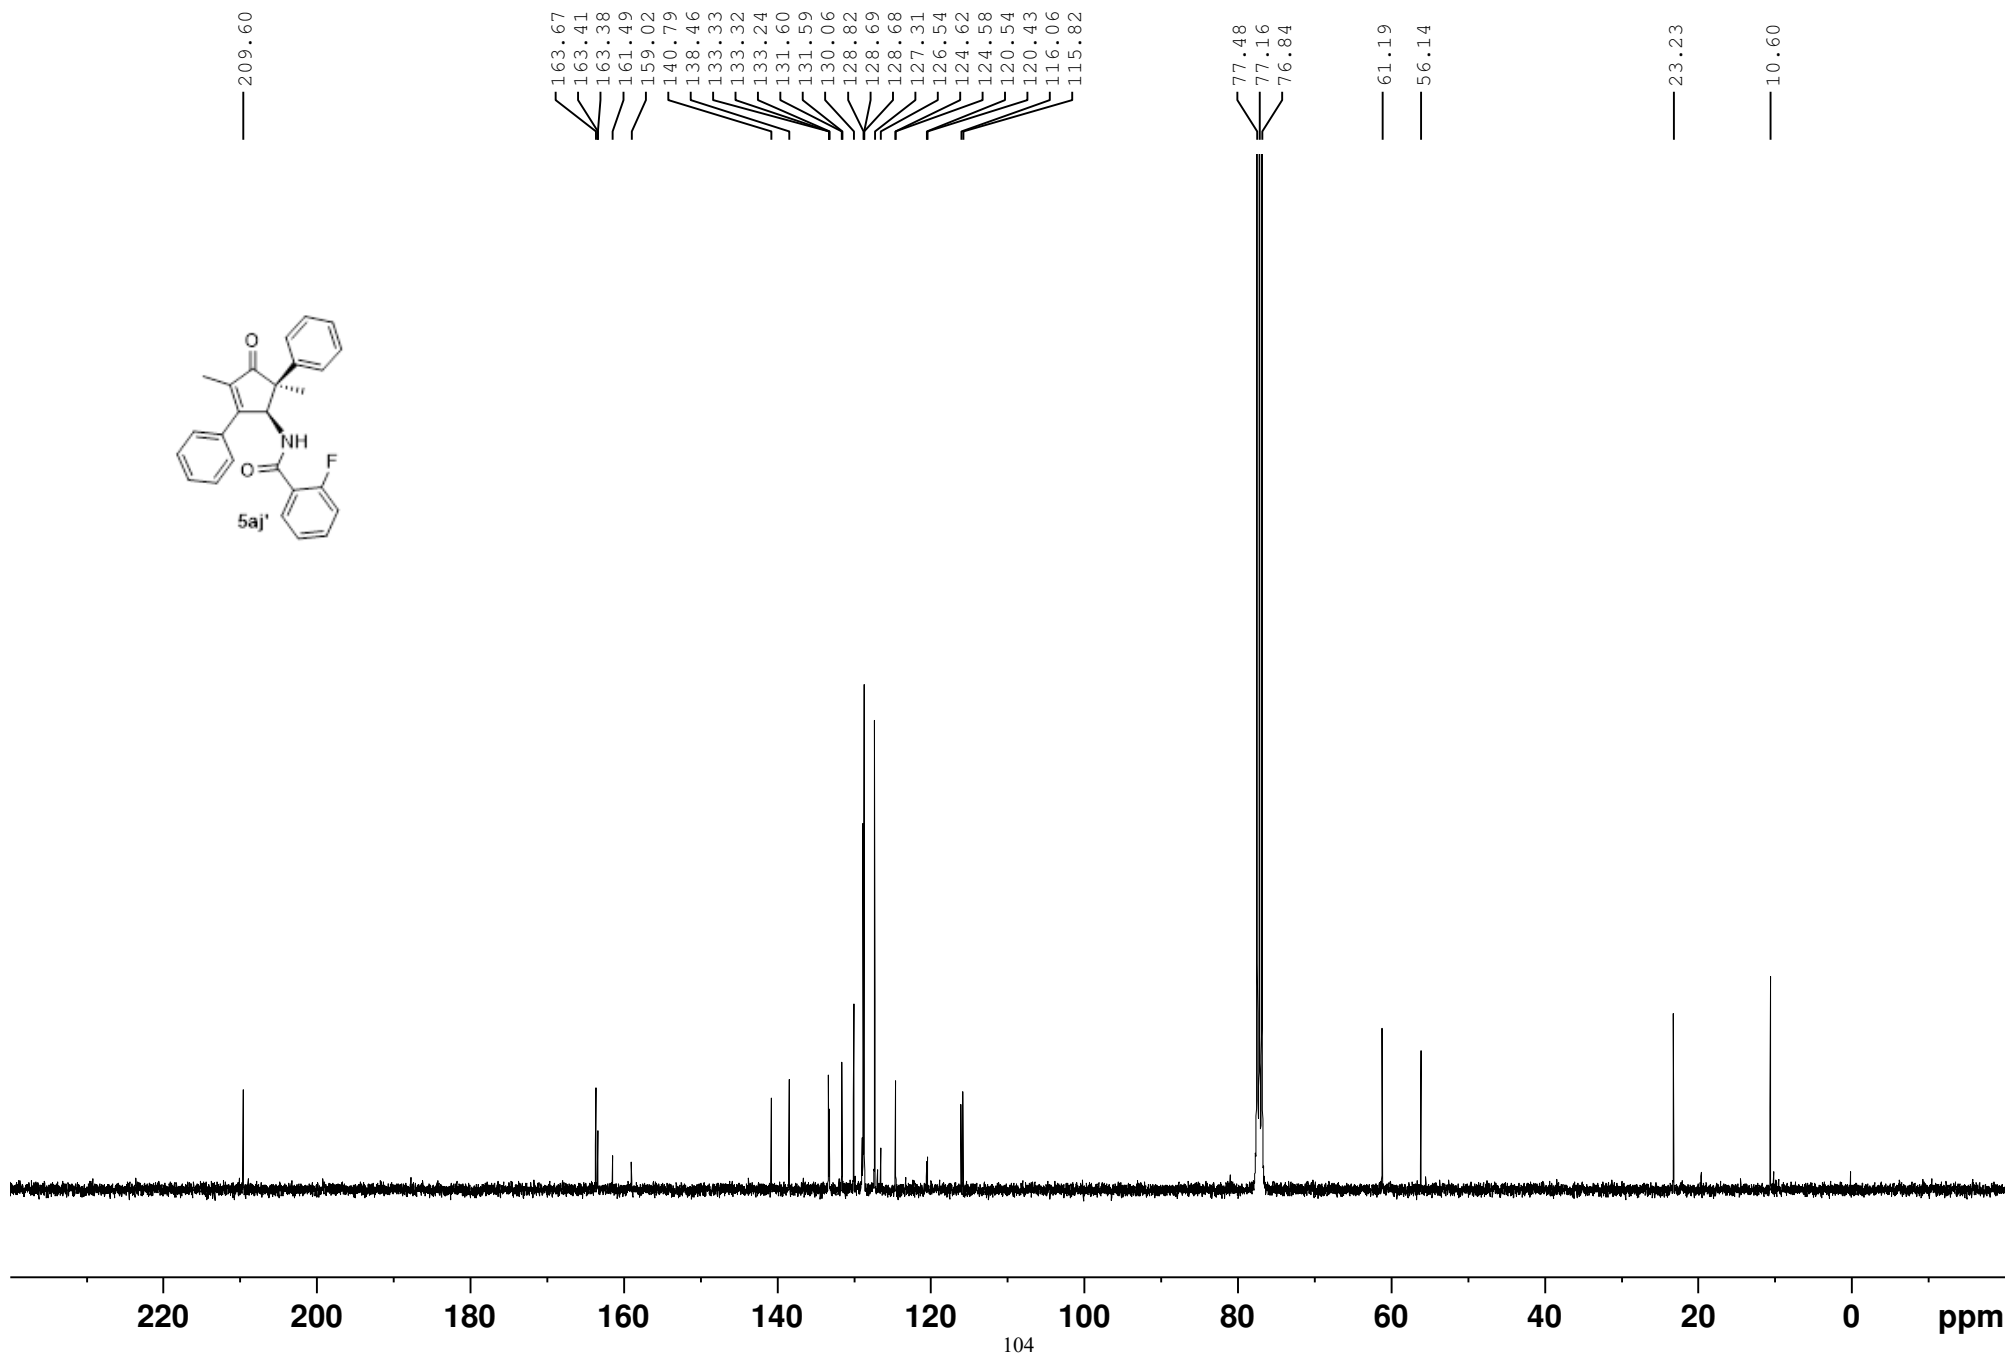

<sup>19</sup>F NMR (376 MHz, CDCl<sub>3</sub>)

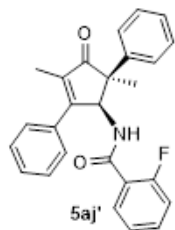

— -114.140

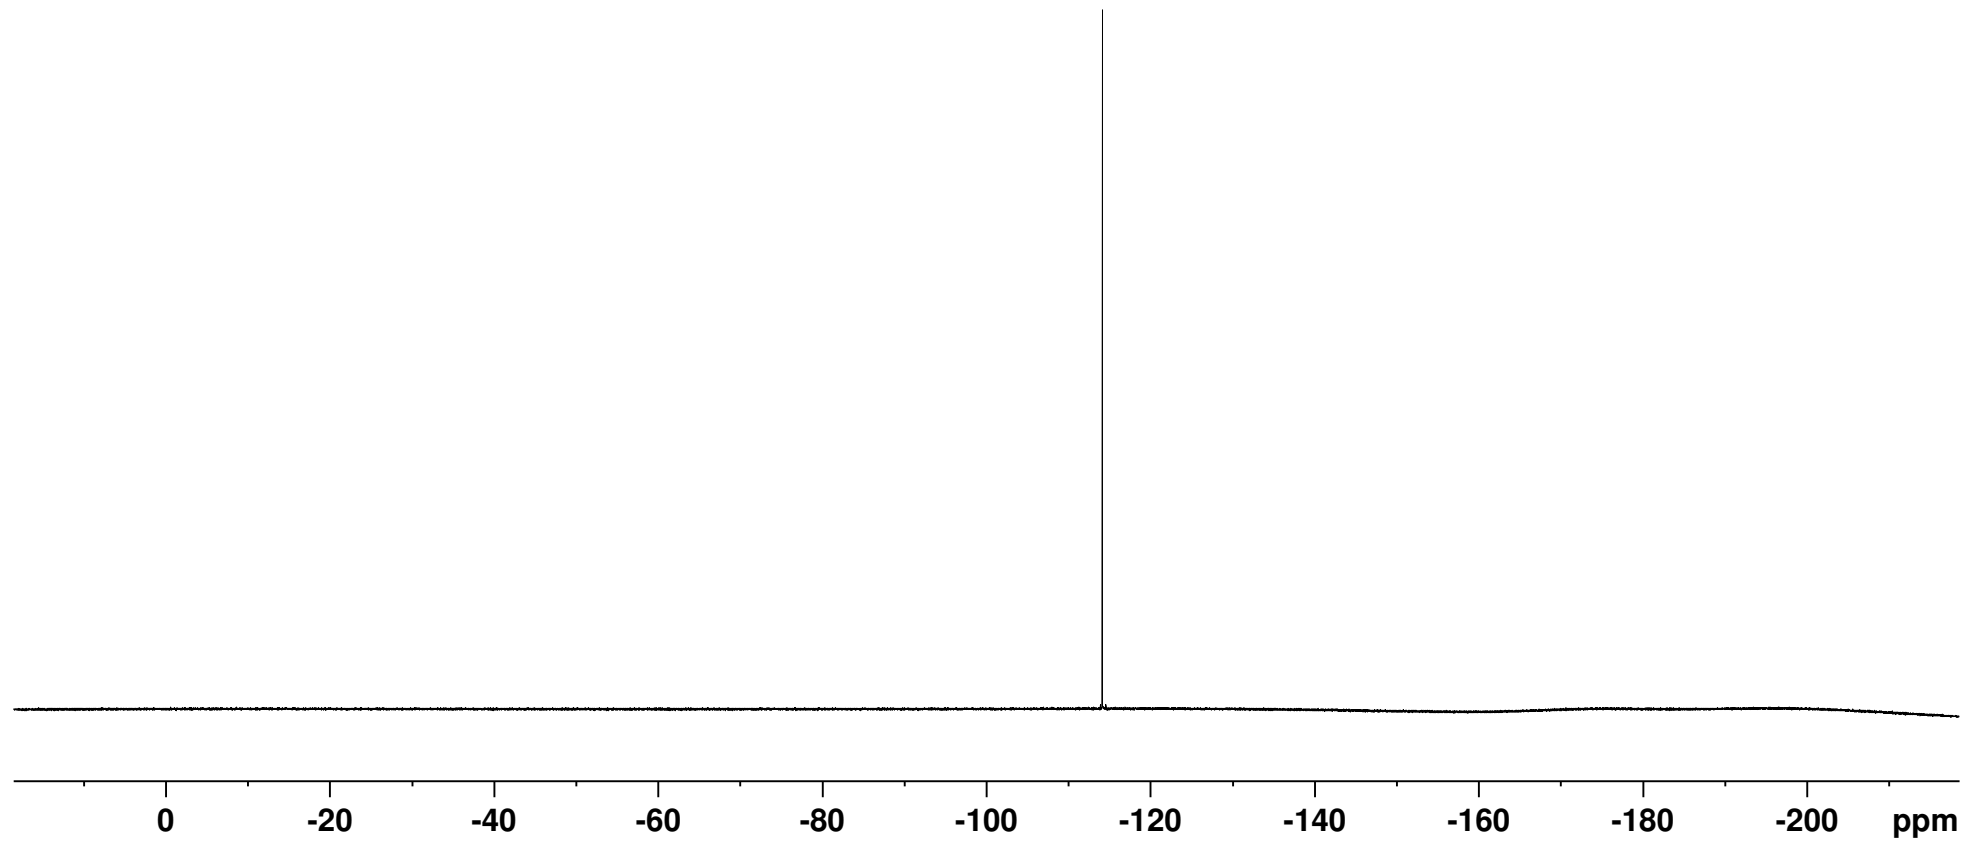

<sup>1</sup>H NMR (400 MHz, CDCl<sub>3</sub>)

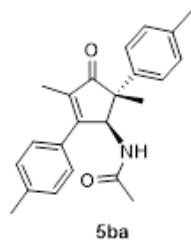

7.395  
7.375  
7.283  
7.263  
7.238  
7.218  
7.119  
7.099

5.903  
5.879  
5.743  
5.719

2.379  
2.298  
2.042  
1.875

1.403

0.077  
-0.000

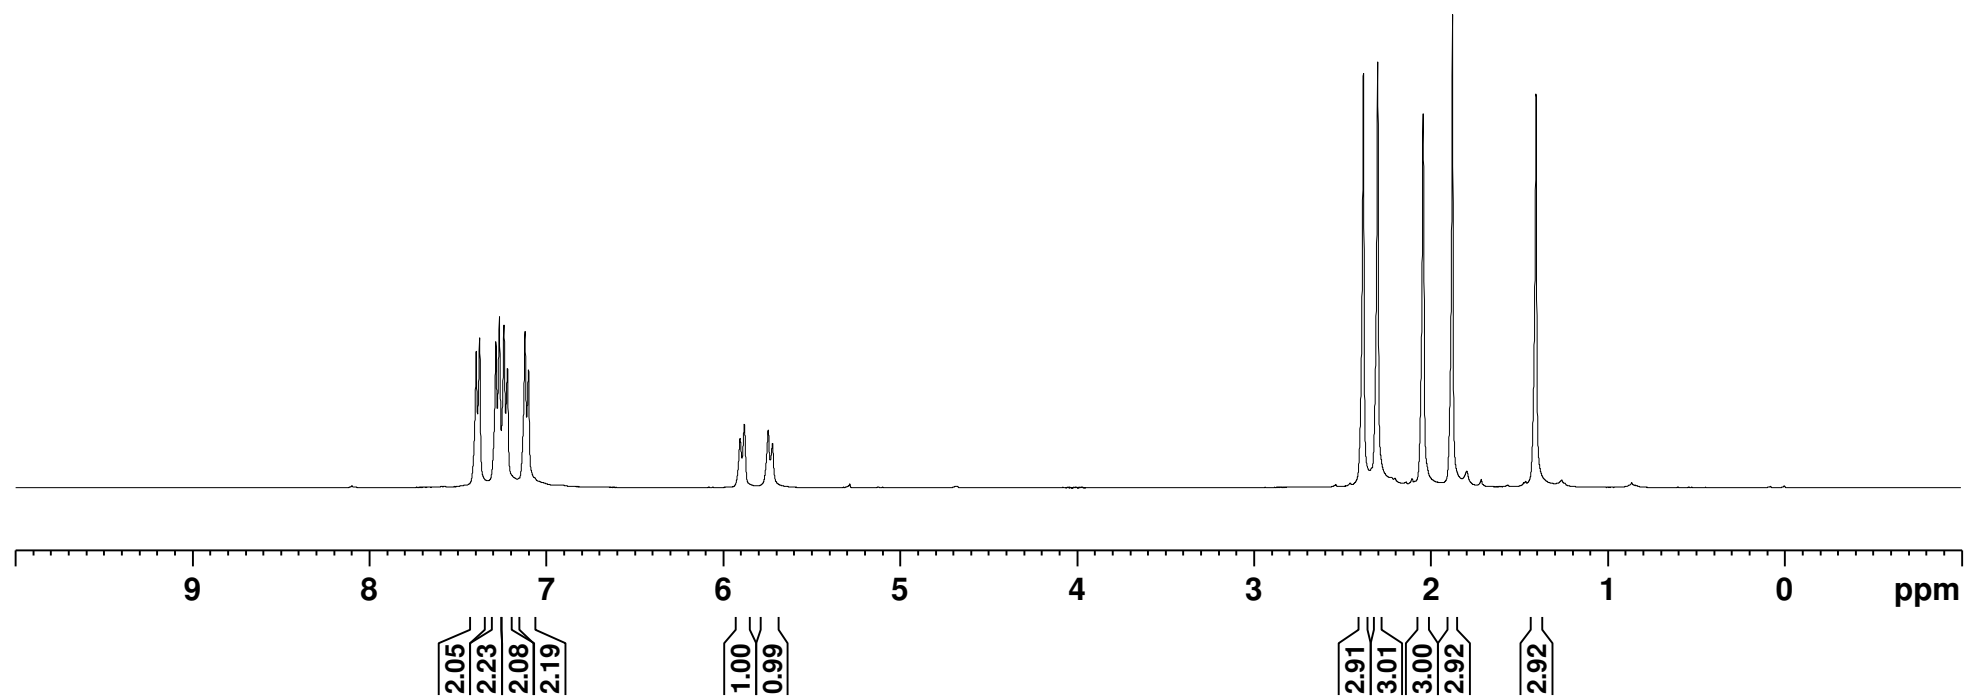

<sup>13</sup>C NMR (100 MHz, CDCl<sub>3</sub>)

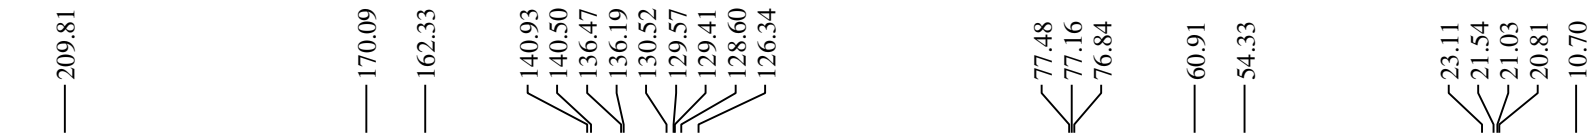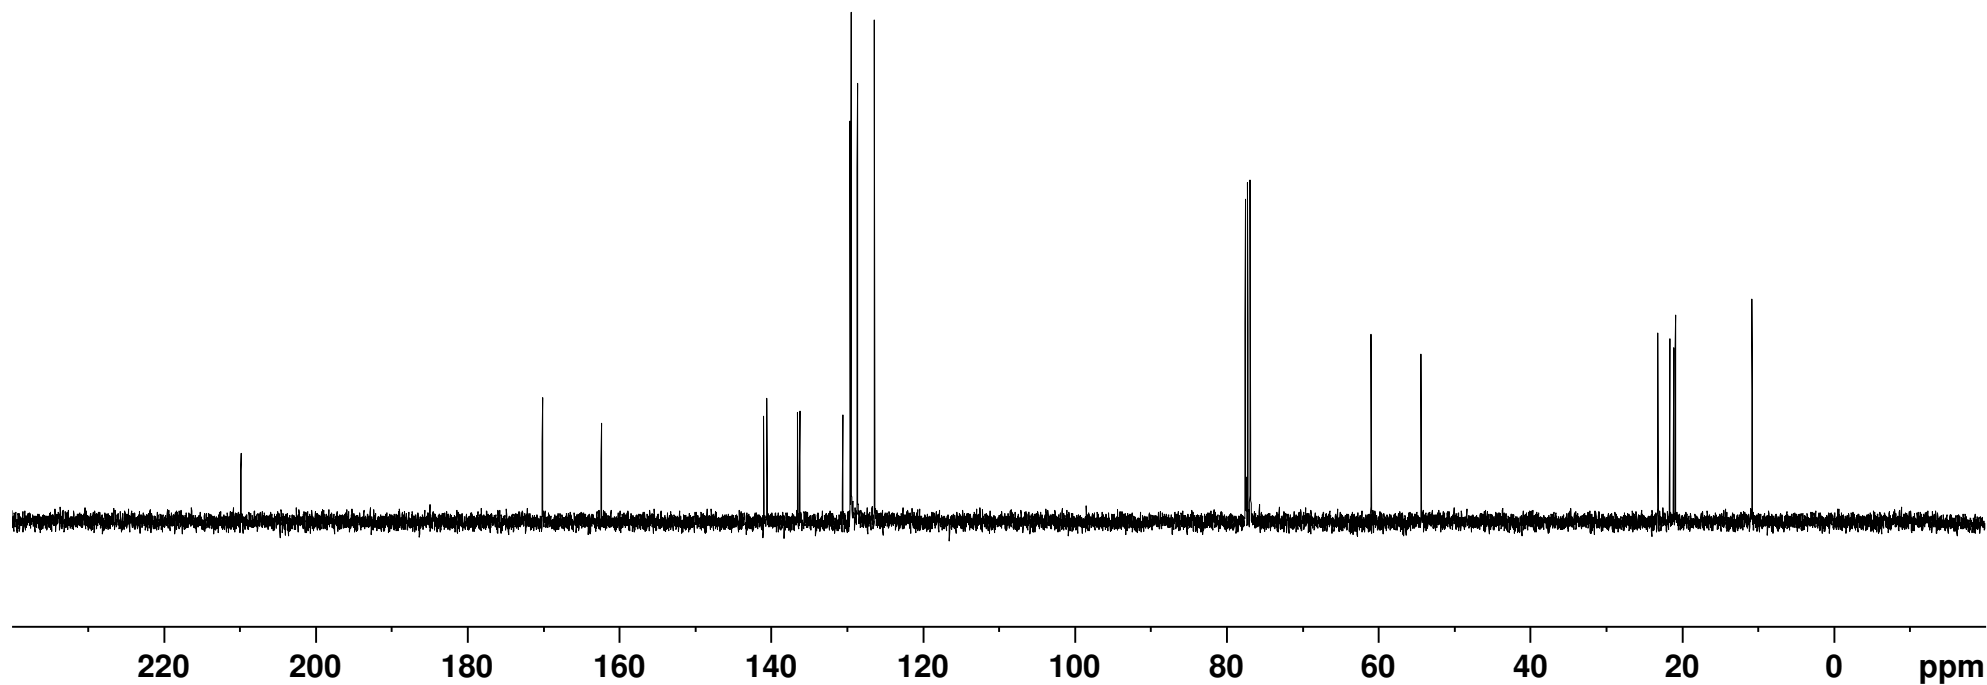

**<sup>1</sup>H NMR (400 MHz, CDCl<sub>3</sub>)**

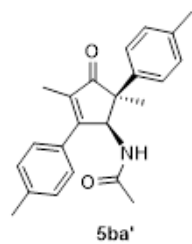

7.418  
7.398  
7.262  
7.239  
7.108  
7.088  
7.021  
7.001

5.690  
5.686  
5.665  
5.660

4.681  
4.655

2.389  
2.295  
2.109  
2.105  
1.732  
1.492

0.070  
-0.000

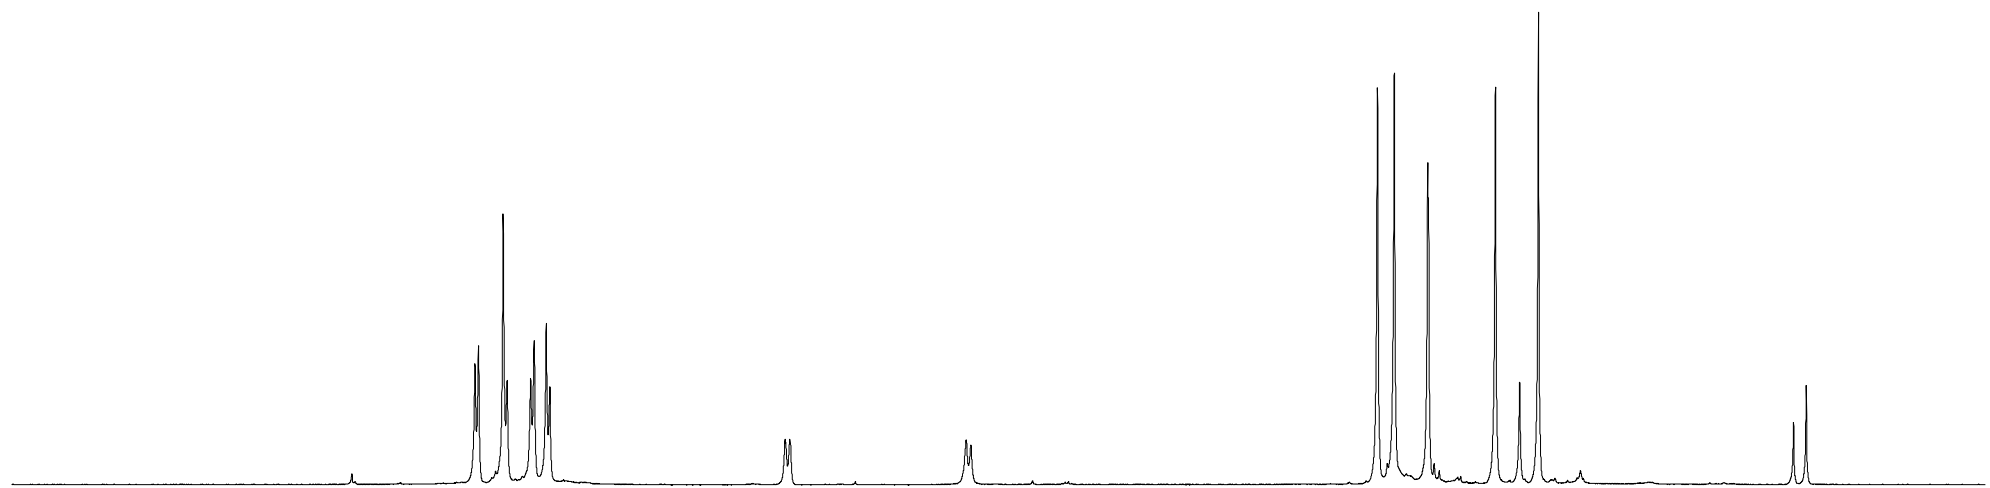

2.10  
2.01  
2.18  
2.15

0.99

1.05

3.12  
3.20  
3.10  
3.00  
3.00

$^{13}\text{C}$  NMR (100 MHz,  $\text{CDCl}_3$ )

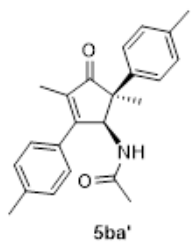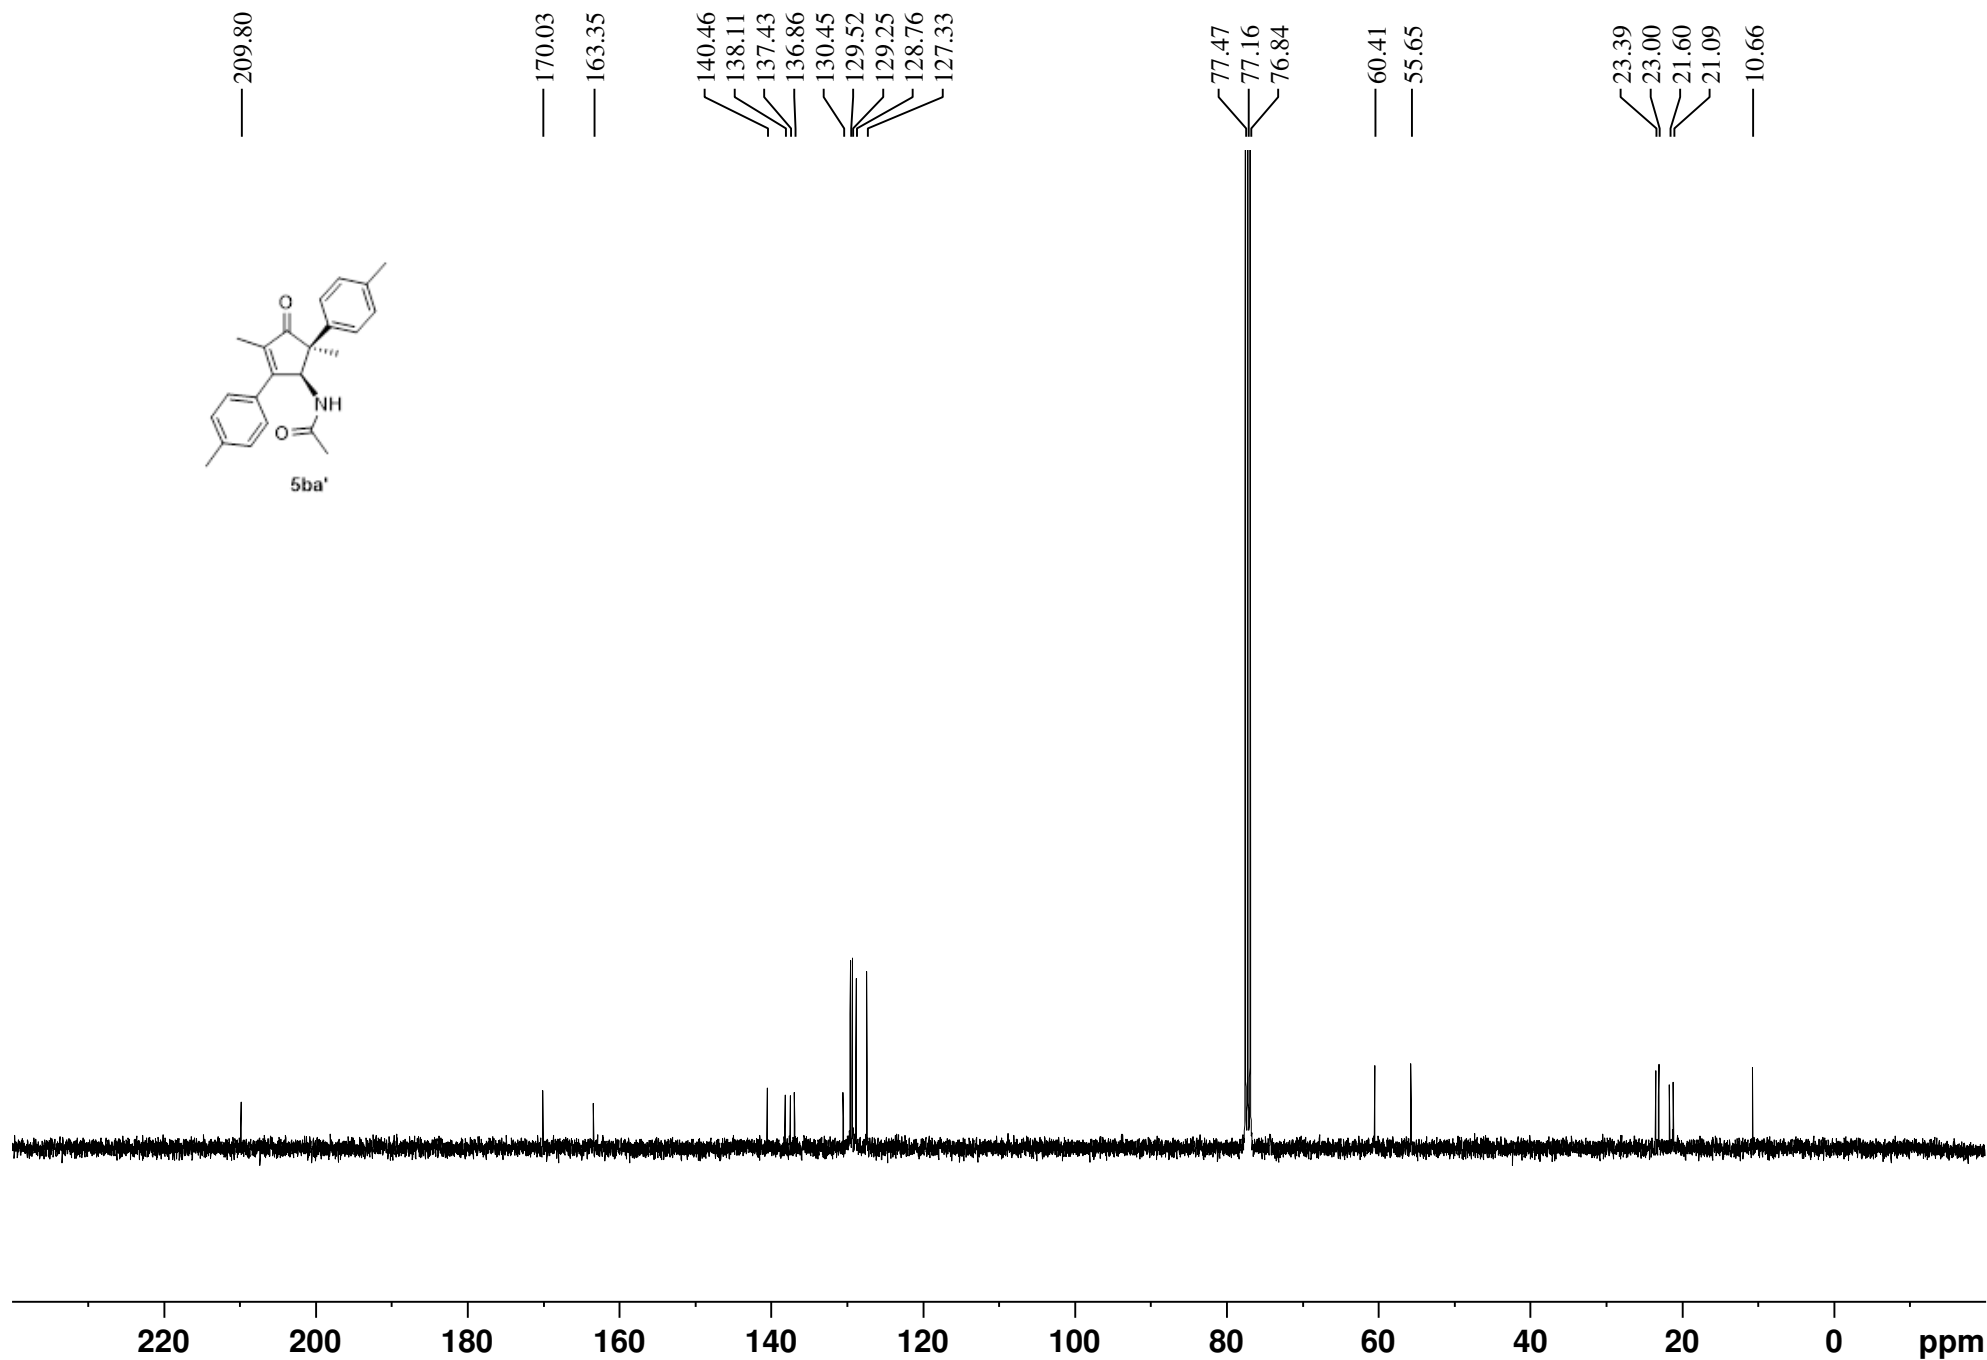

**<sup>1</sup>H NMR (400 MHz, CDCl<sub>3</sub>)**

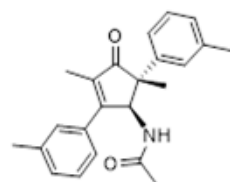

5ca

7.344  
7.326  
7.307  
7.295  
7.275  
7.259  
7.236  
7.218  
7.208  
7.192  
7.180  
7.047  
7.042  
7.039  
7.031  
5.904  
5.900  
5.880  
5.875  
5.565  
5.541

2.377  
2.331  
2.057  
2.053  
1.886  
1.419

0.075  
-0.000

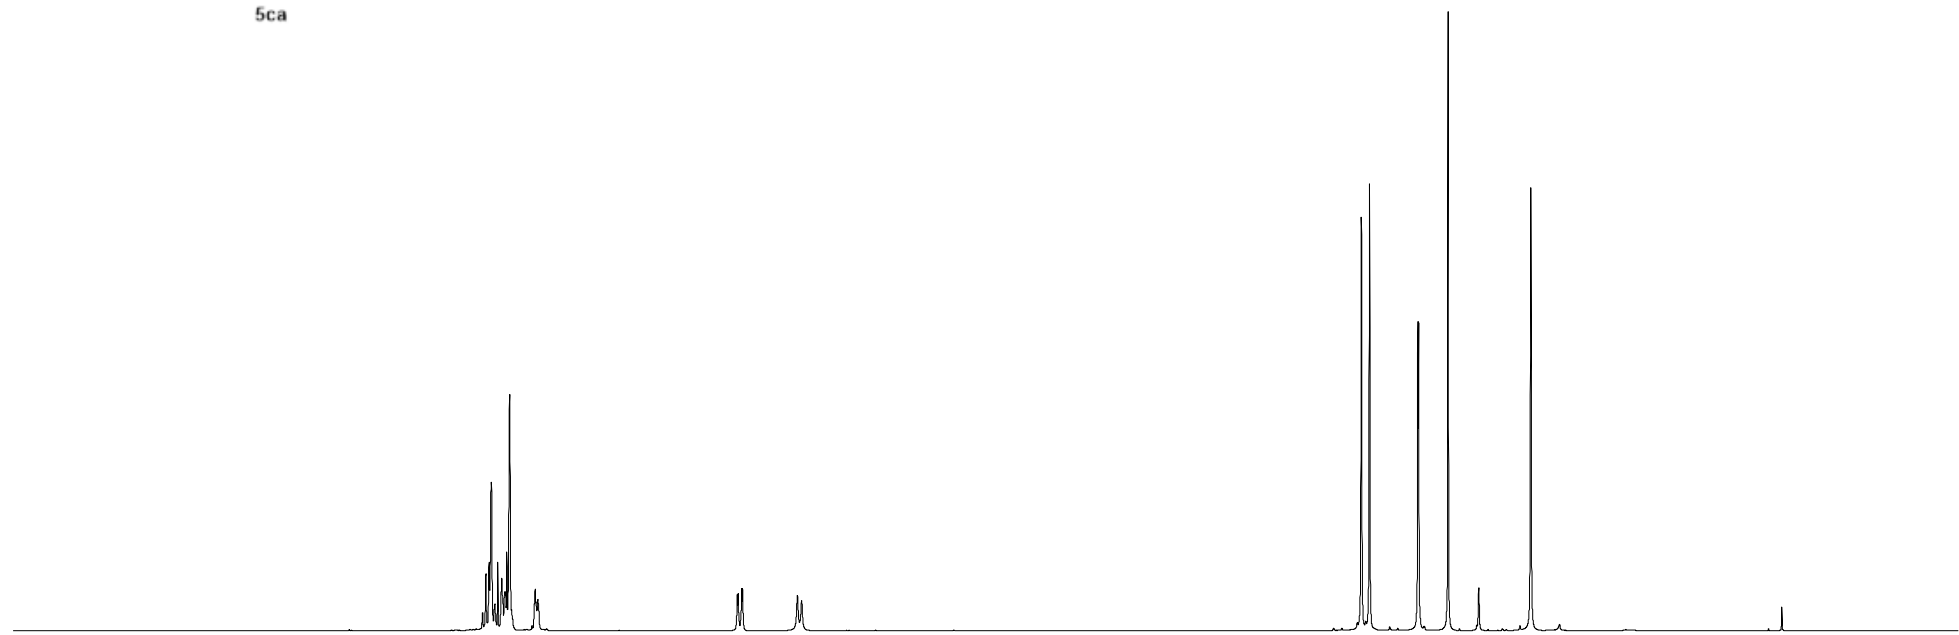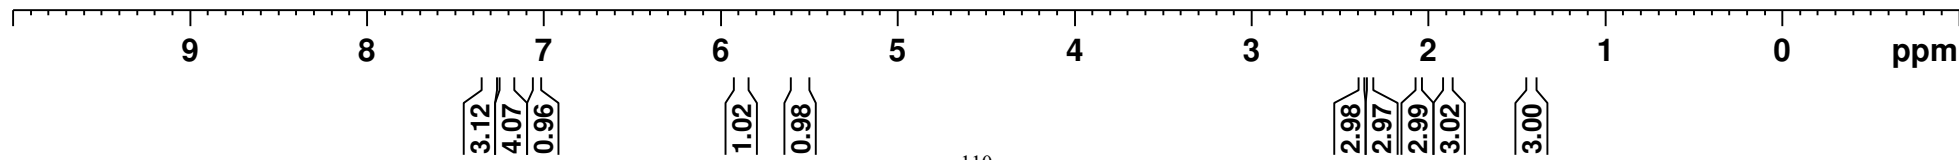



**$^{13}\text{C}$  NMR (100 MHz,  $\text{CDCl}_3$ )**

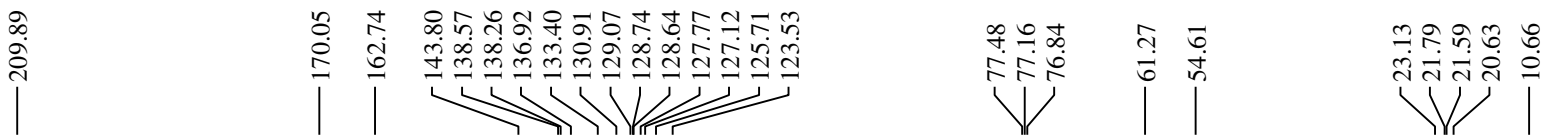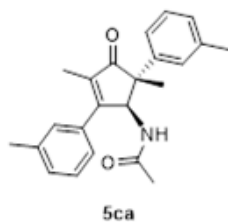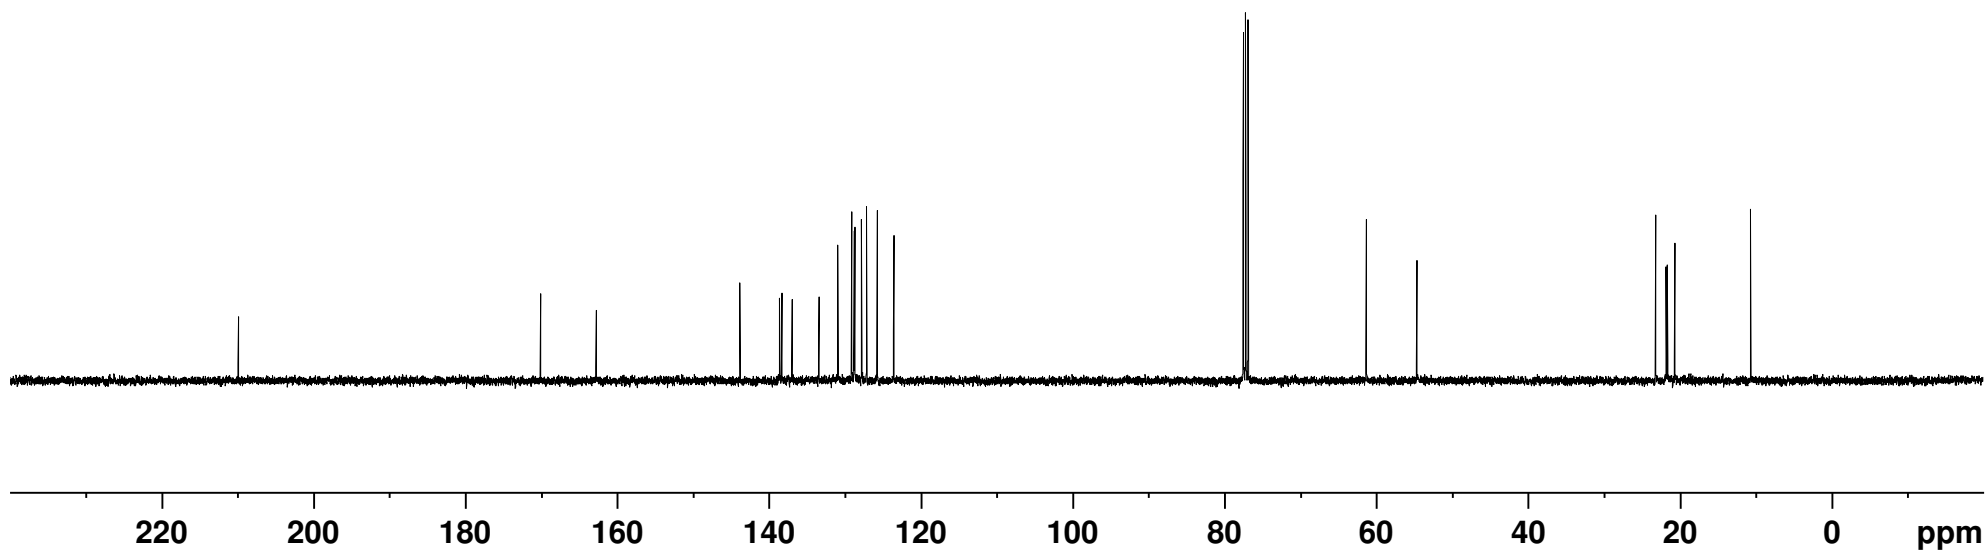

**<sup>1</sup>H NMR (400 MHz, CDCl<sub>3</sub>)**

7.356  
7.338  
7.319  
7.313  
7.292  
7.289  
7.262  
7.234  
7.216  
7.202  
7.199  
7.183  
7.162  
7.050  
7.032  
6.928  
6.911  
5.700  
5.695  
5.674  
5.669  
4.668  
4.642

2.395  
2.314  
2.113  
2.108  
1.750  
1.475

0.071  
0.008  
-0.000  
-0.008

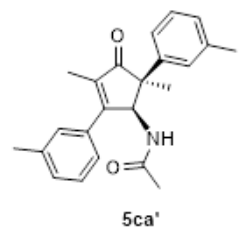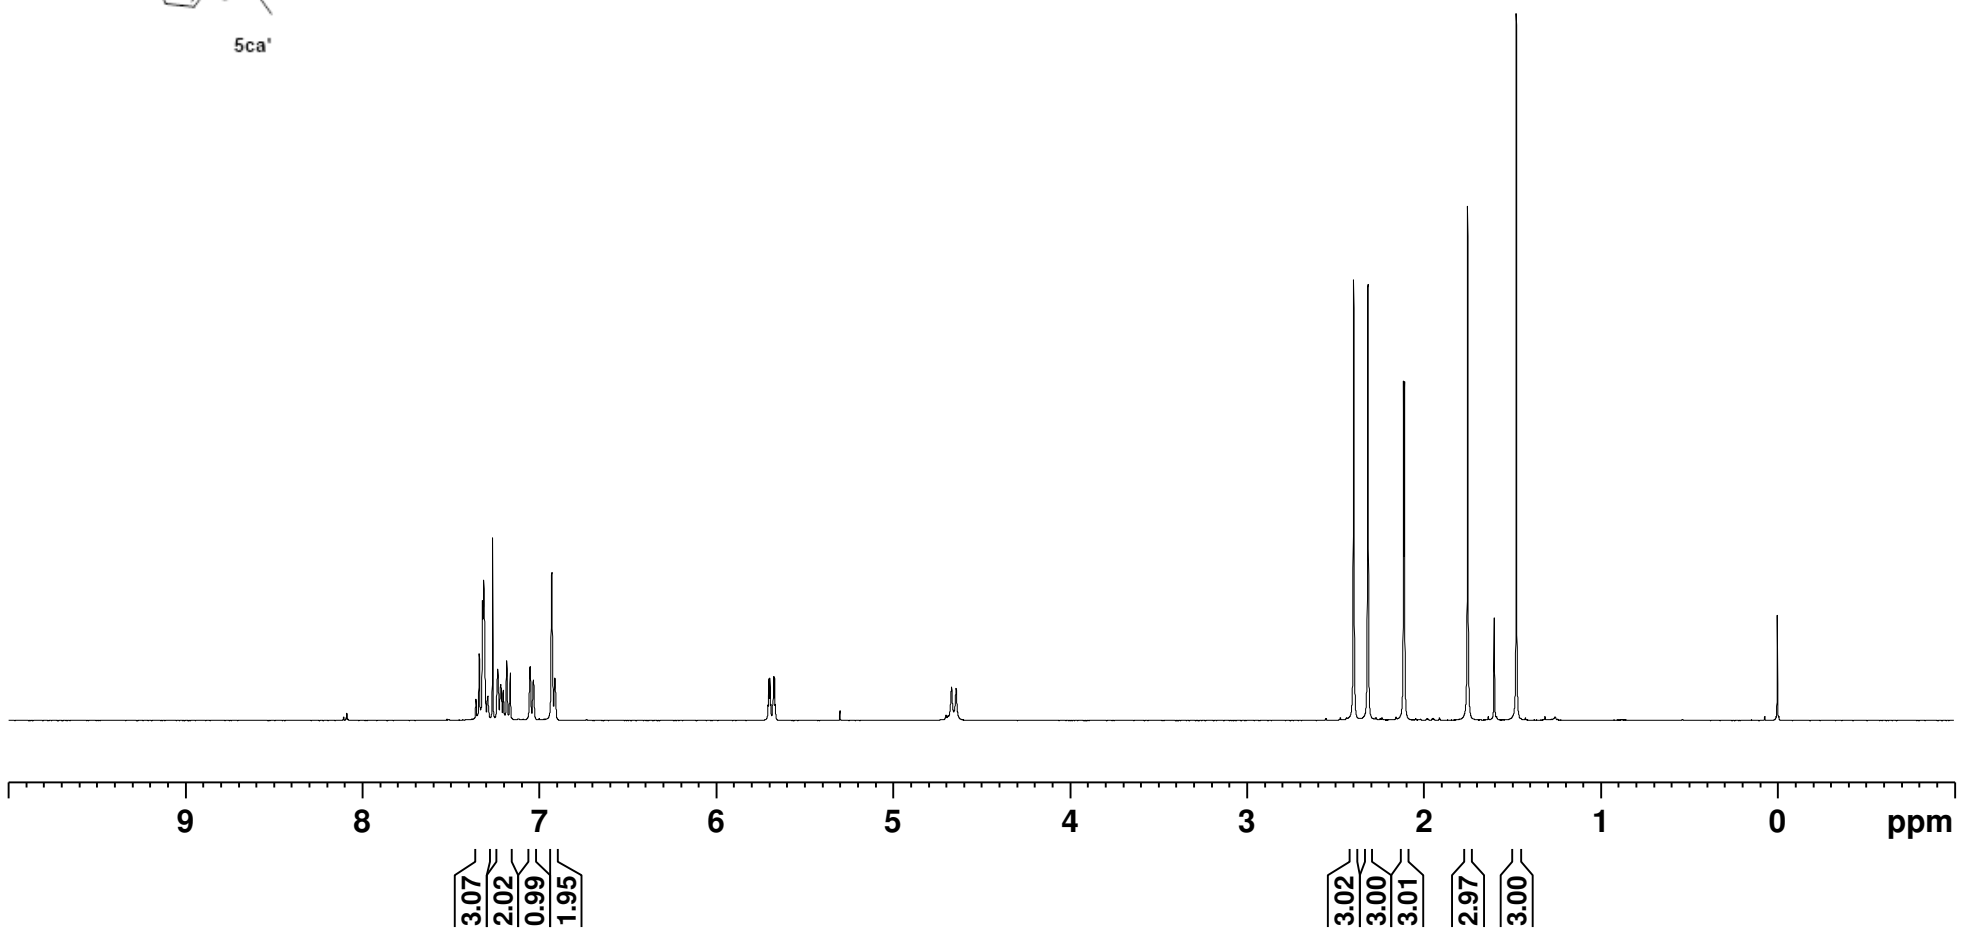

$^{13}\text{C}$  NMR (100 MHz,  $\text{CDCl}_3$ )

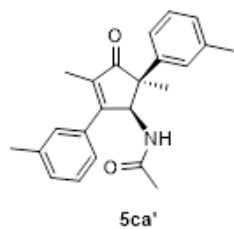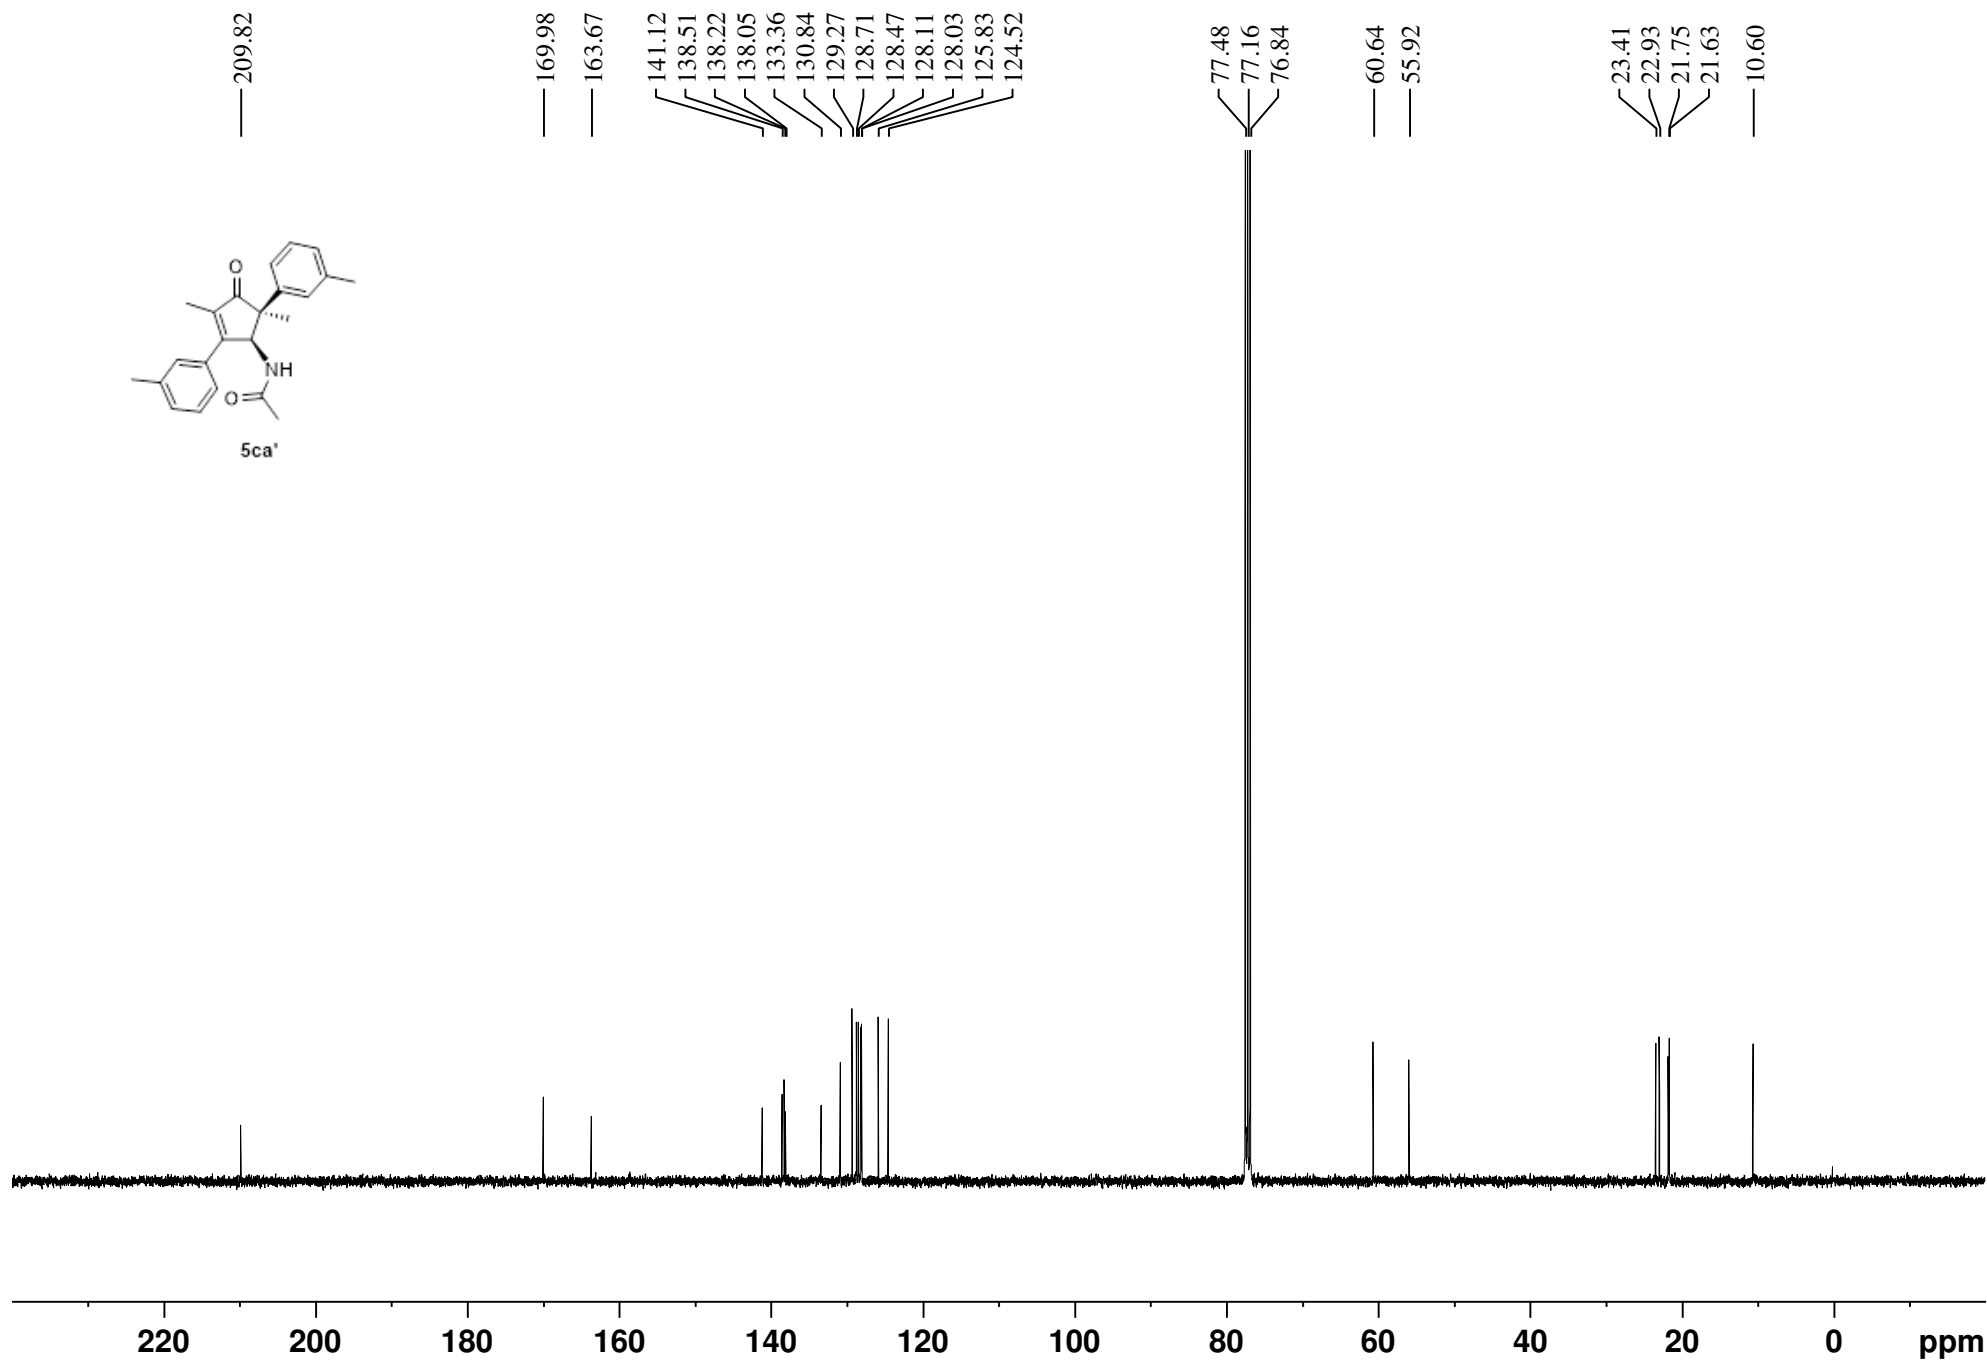

<sup>1</sup>H NMR (400 MHz, CDCl<sub>3</sub>)

7.513  
7.508  
7.500  
7.491  
7.483  
7.478  
7.413  
7.408  
7.400  
7.395  
7.391  
7.383  
7.378  
7.269  
7.167  
7.162  
7.146  
7.129  
7.124  
7.030  
7.025  
7.008  
6.992  
6.986  
5.903  
5.898  
5.878  
5.874  
5.584  
5.559

2.053  
2.049  
1.924

1.413

0.075  
-0.000

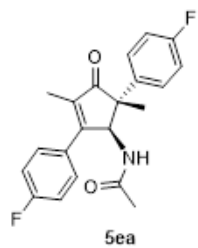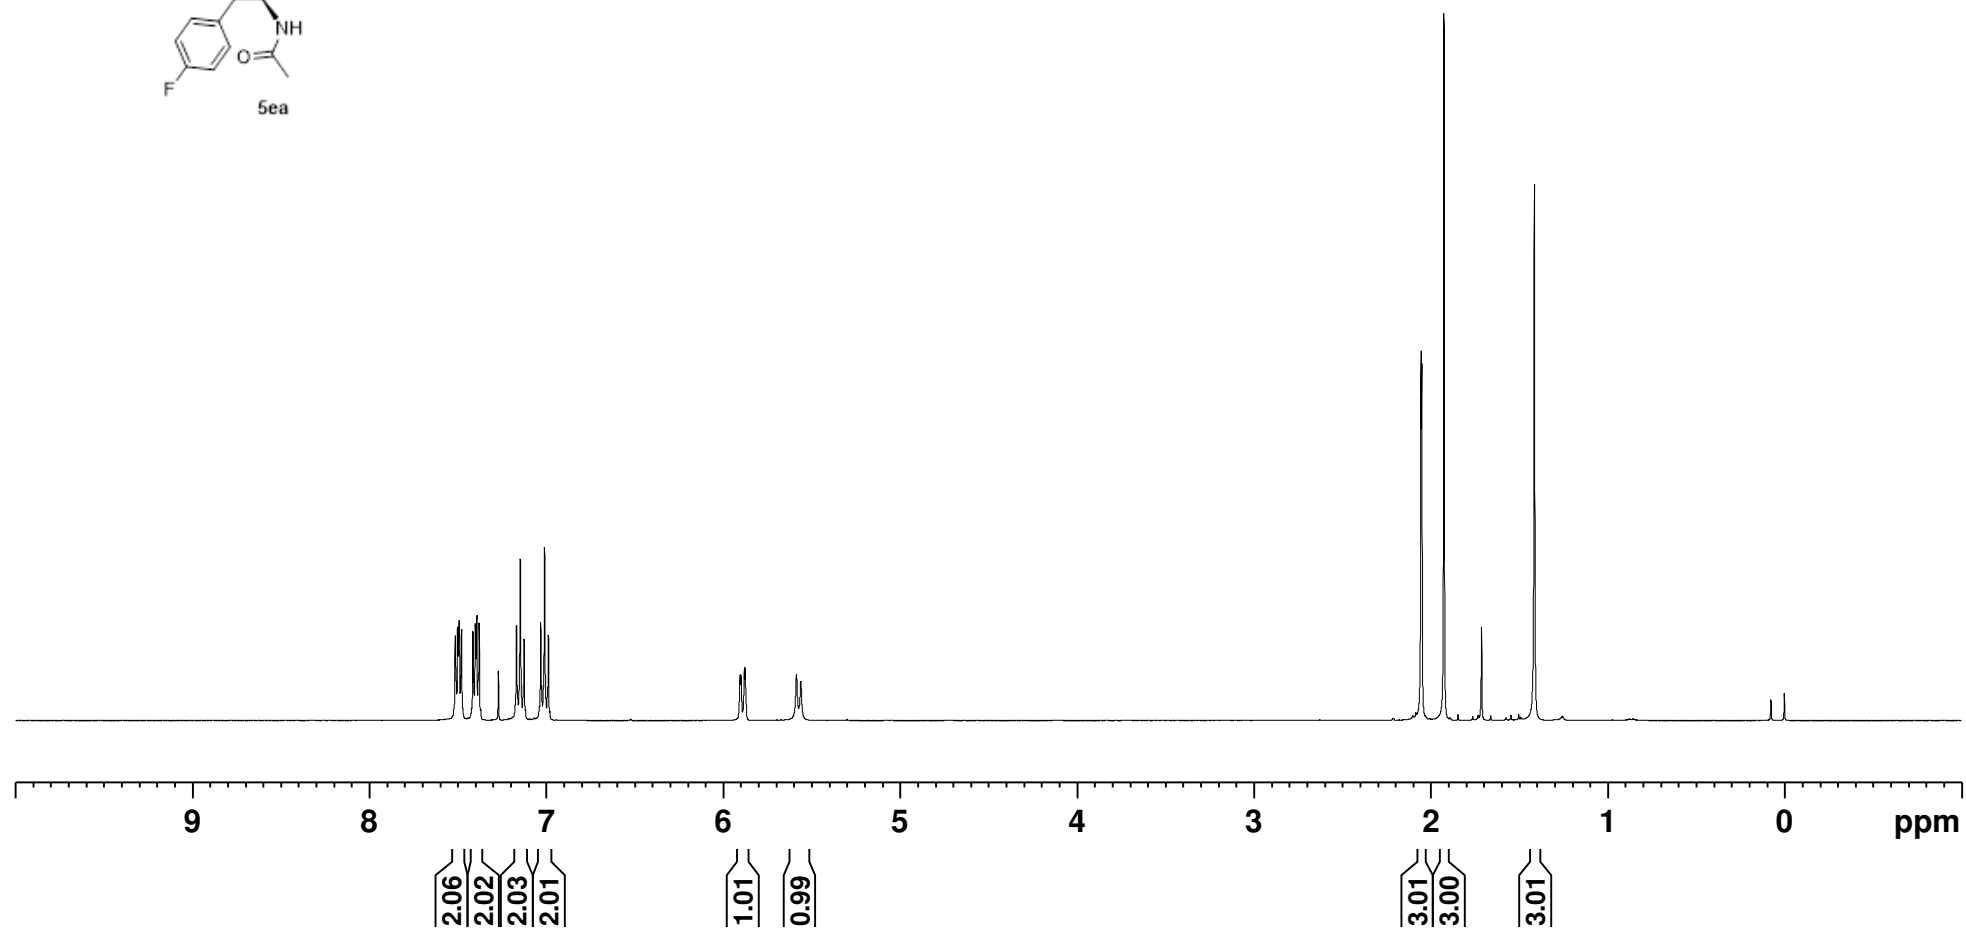

<sup>13</sup>C NMR (100 MHz, CDCl<sub>3</sub>)

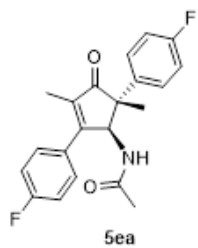

— 209.11

170.18  
164.88  
163.03  
162.38  
161.20  
160.59

139.33  
139.30  
136.67  
130.77  
130.69  
129.29  
129.25  
128.32  
128.24  
116.30  
116.08  
115.68  
115.47

77.48  
77.16  
76.84

— 60.77

— 54.10

23.16  
21.45

— 10.64

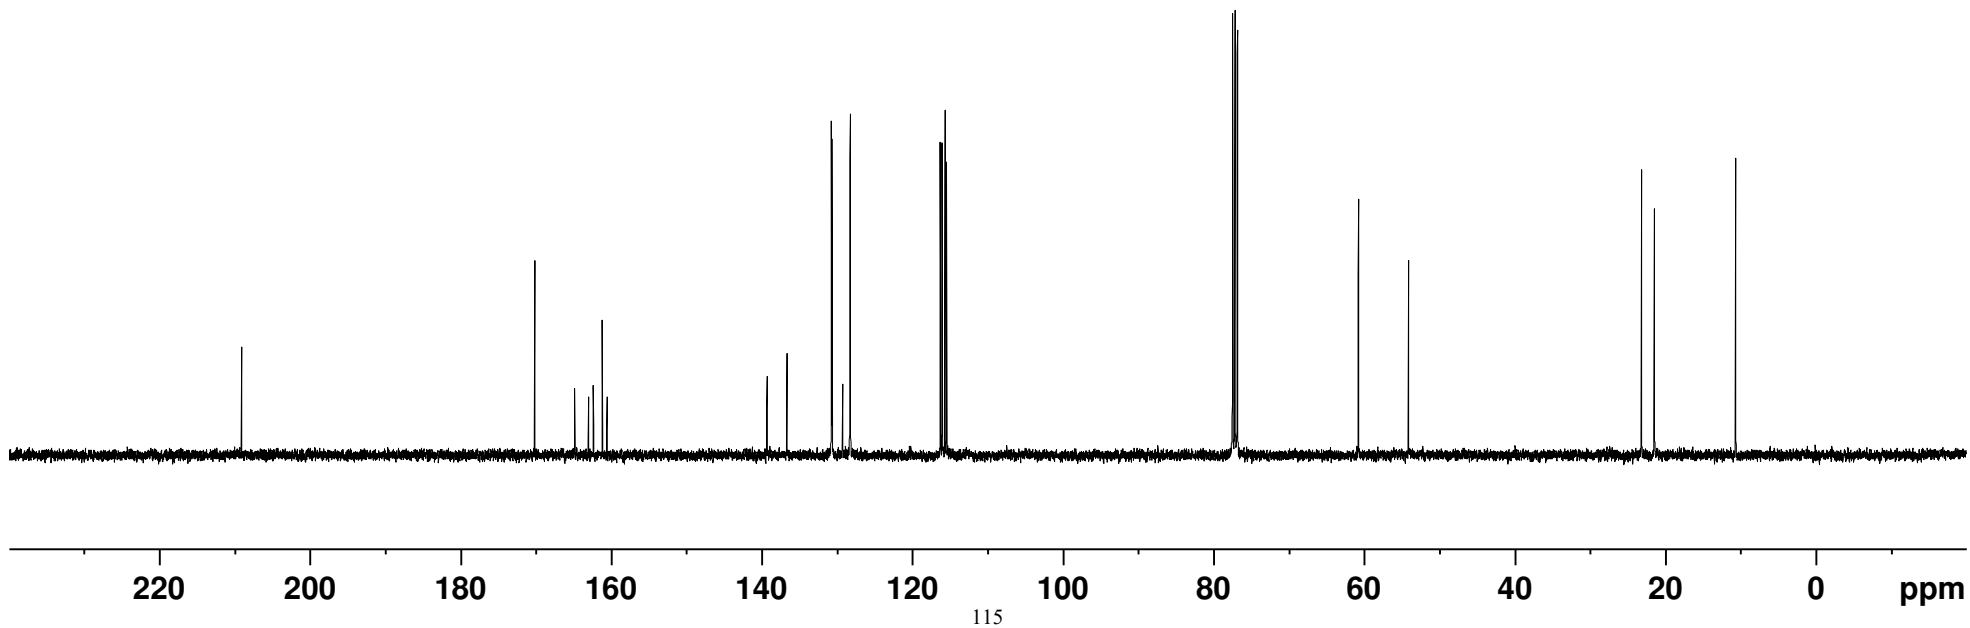

**<sup>19</sup>F NMR (376 MHz, CDCl<sub>3</sub>)**

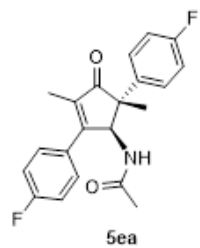

— -109.041  
— -115.913

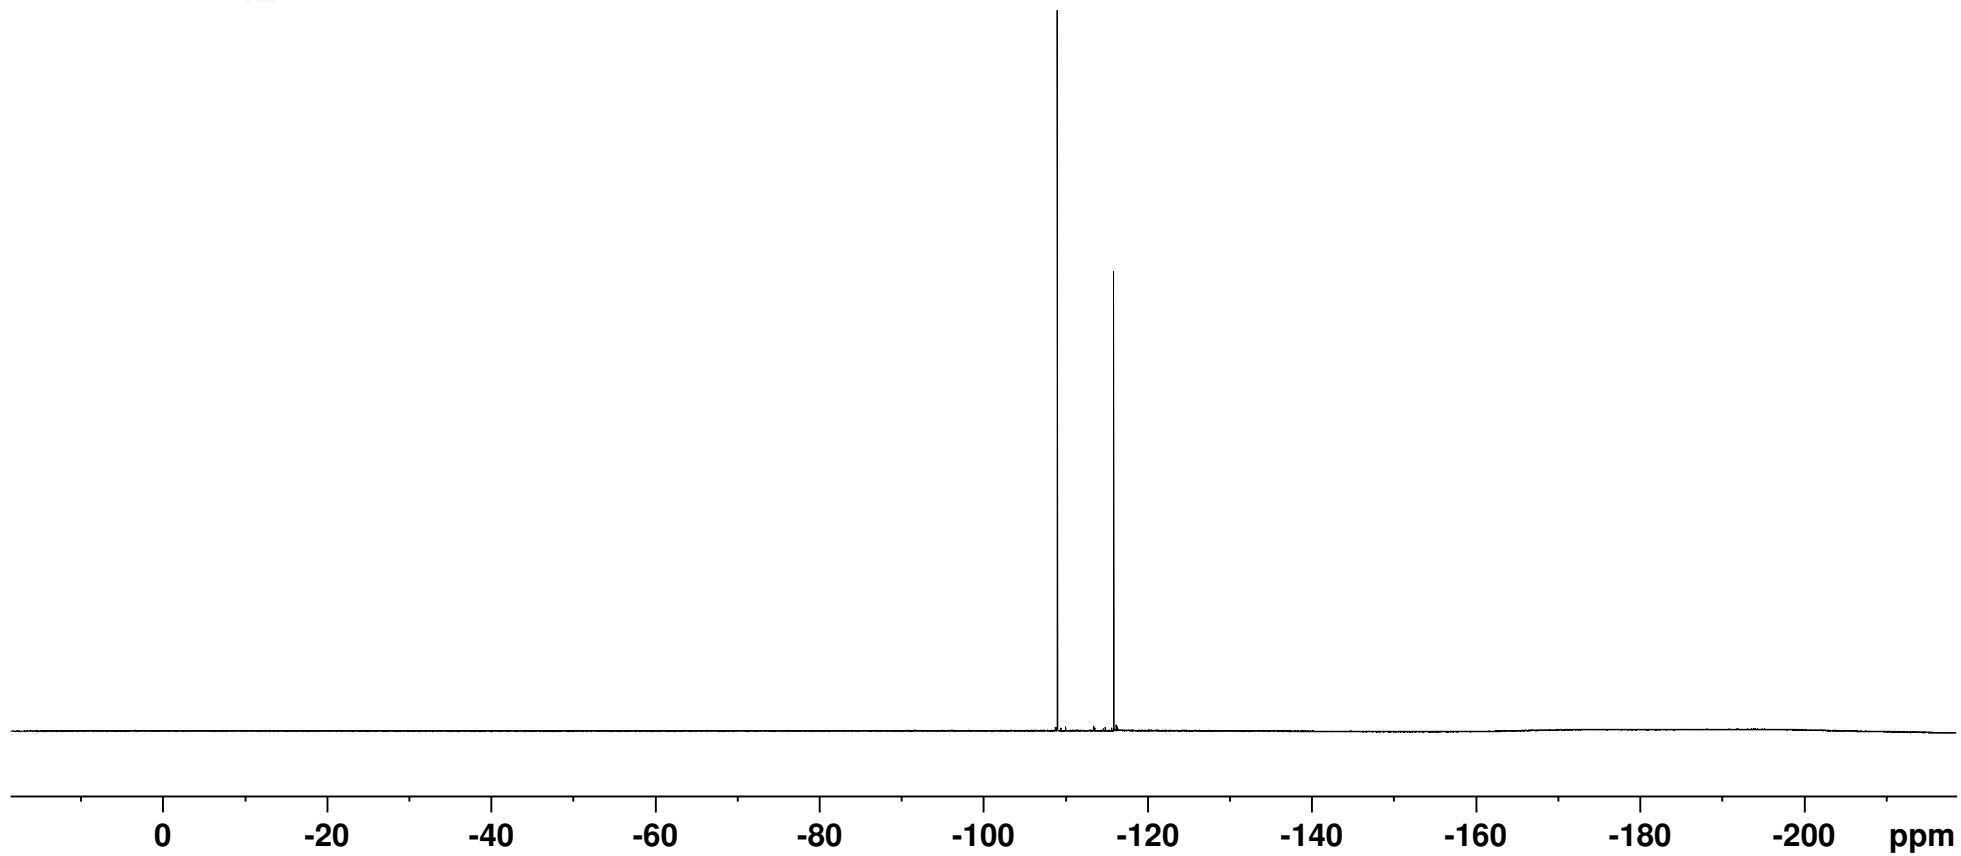

<sup>1</sup>H NMR (400 MHz, CDCl<sub>3</sub>)

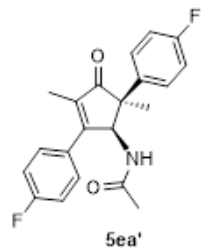

7.536  
7.523  
7.514  
7.501  
7.268  
7.174  
7.153  
7.137  
7.132  
7.124  
7.115  
7.102  
7.025  
7.003  
6.981  
5.682  
5.677  
5.656  
5.652  
4.690  
4.665  
2.110  
2.106  
1.741  
1.510  
0.072  
-0.000

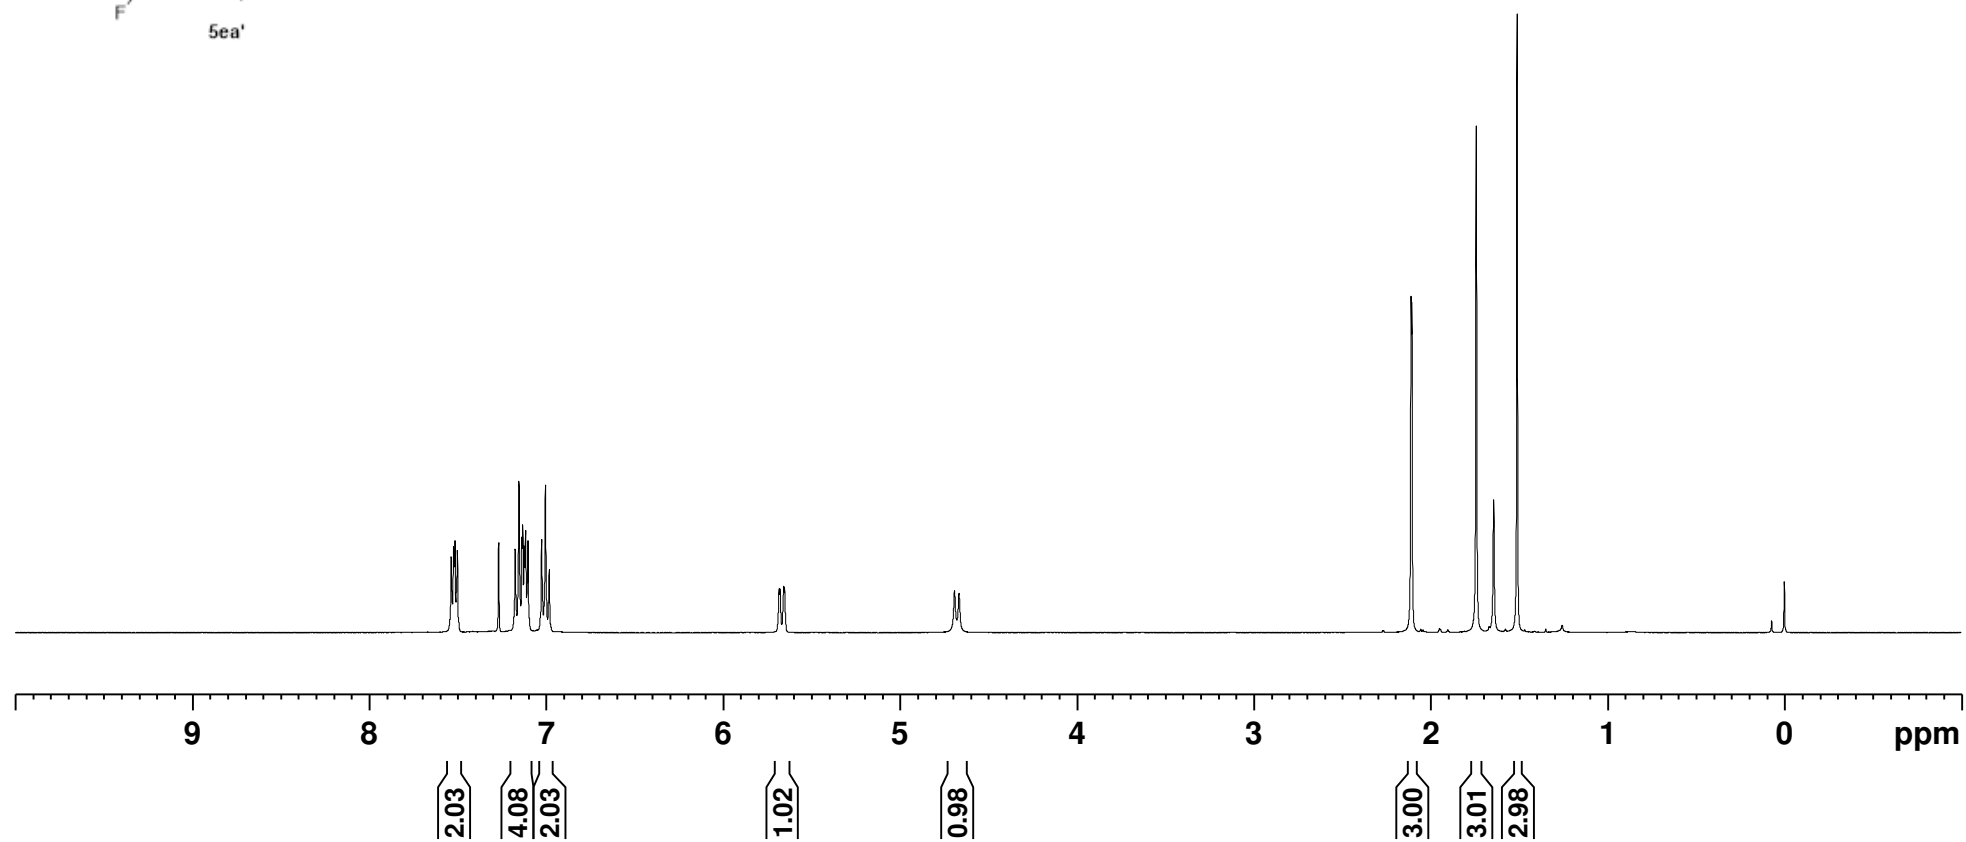

<sup>13</sup>C NMR (100 MHz, CDCl<sub>3</sub>)

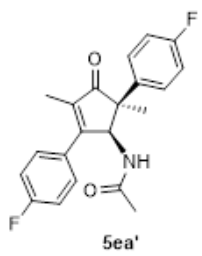

- 209.35
- 169.99
- 164.90
- 163.08
- 162.39
- 161.90
- 160.63
- 137.71
- 136.68
- 136.65
- 130.88
- 130.80
- 129.31
- 129.24
- 129.21
- 116.25
- 116.04
- 115.54
- 115.33
- 77.47
- 77.16
- 76.84
- 60.48
- 55.34
- 24.18
- 22.86
- 10.65

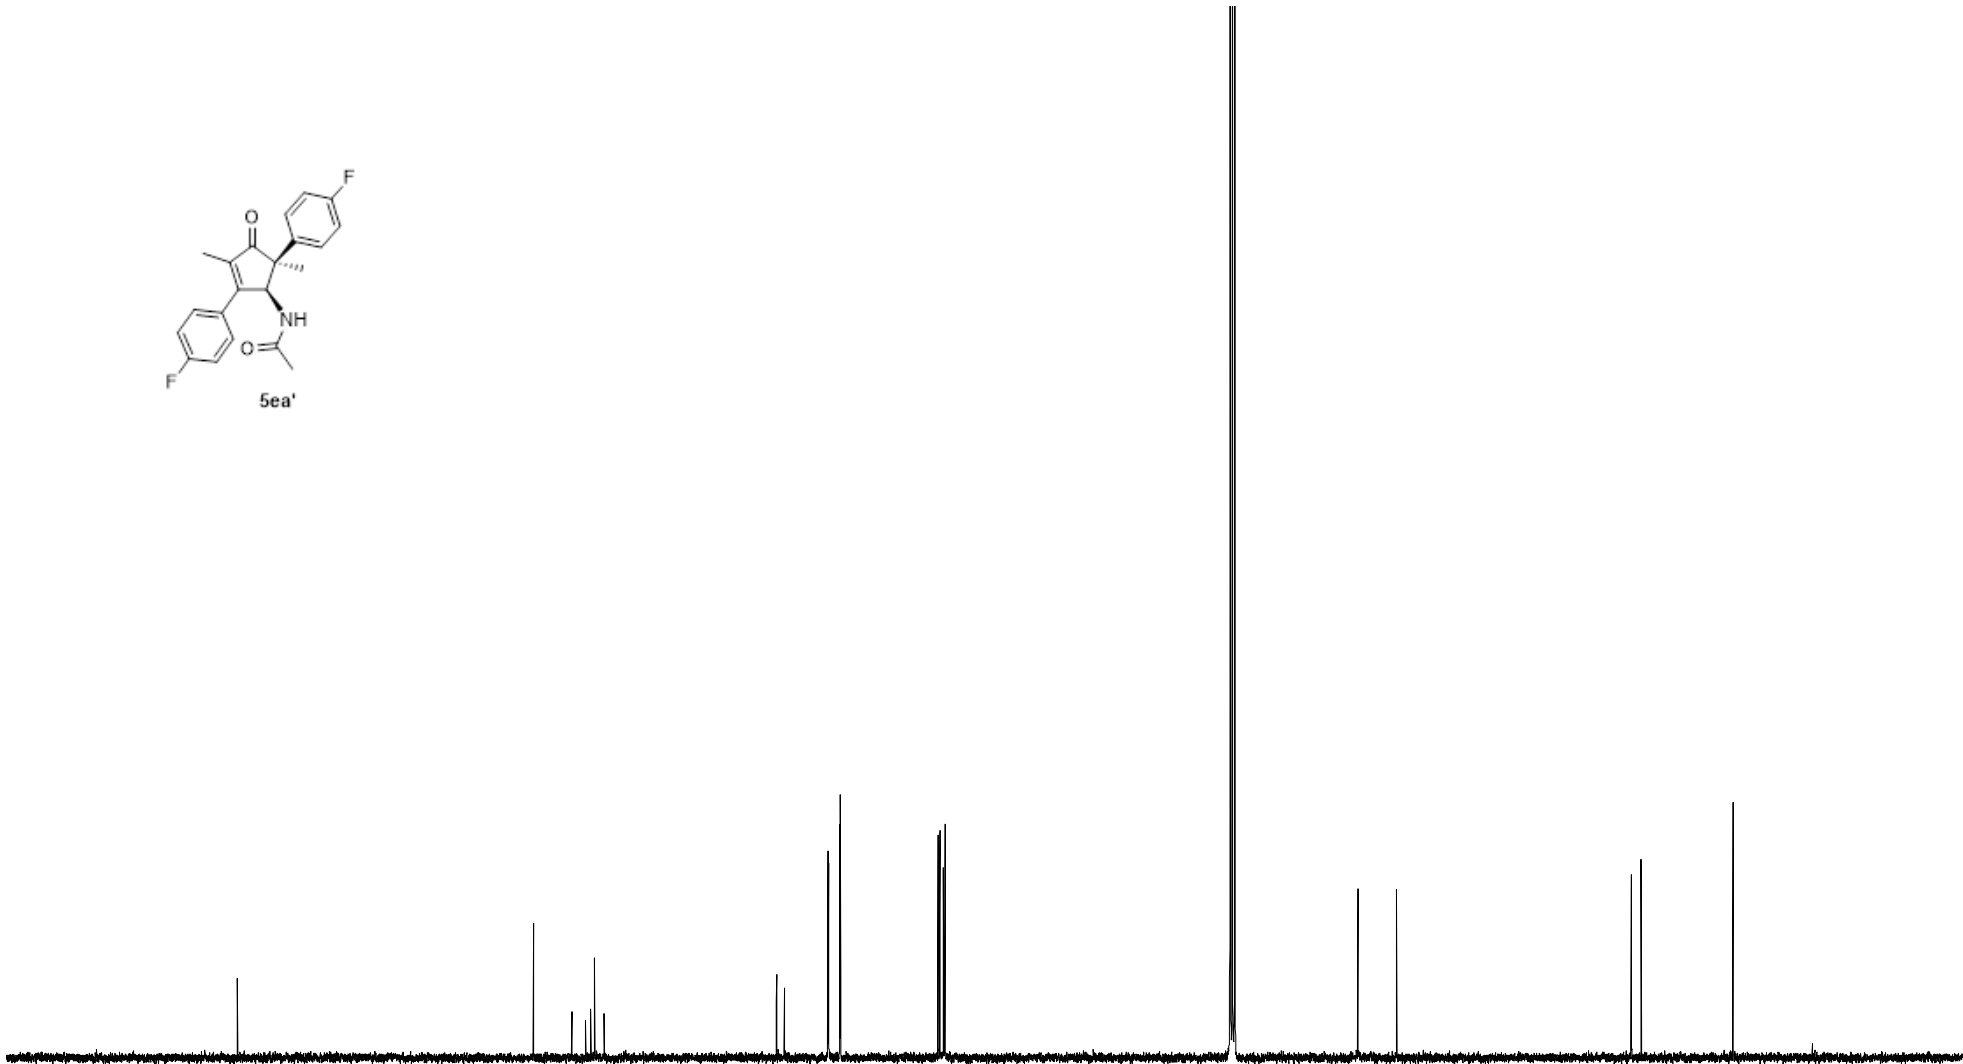

220 200 180 160 140 120 100 80 60 40 20 0 ppm



**<sup>19</sup>F NMR (376 MHz, CDCl<sub>3</sub>)**

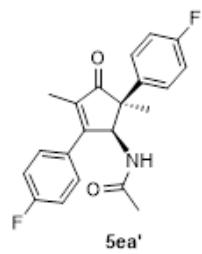

— -109.113  
— -114.920

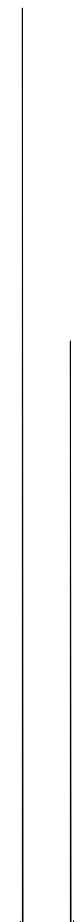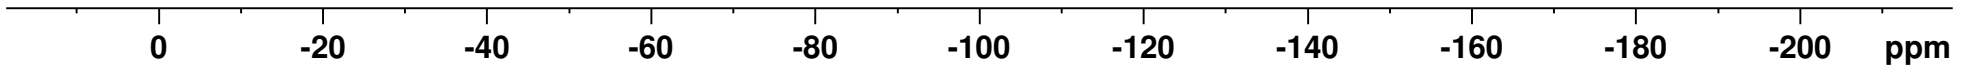

<sup>1</sup>H NMR (400 MHz, CDCl<sub>3</sub>)

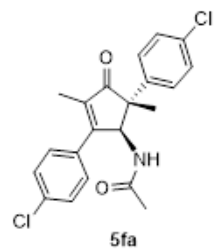

7.422  
7.370  
7.354  
7.349  
7.300  
7.284  
7.279  
7.268

5.890  
5.865  
5.584  
5.560

2.043  
1.920

1.406

0.075  
-0.000

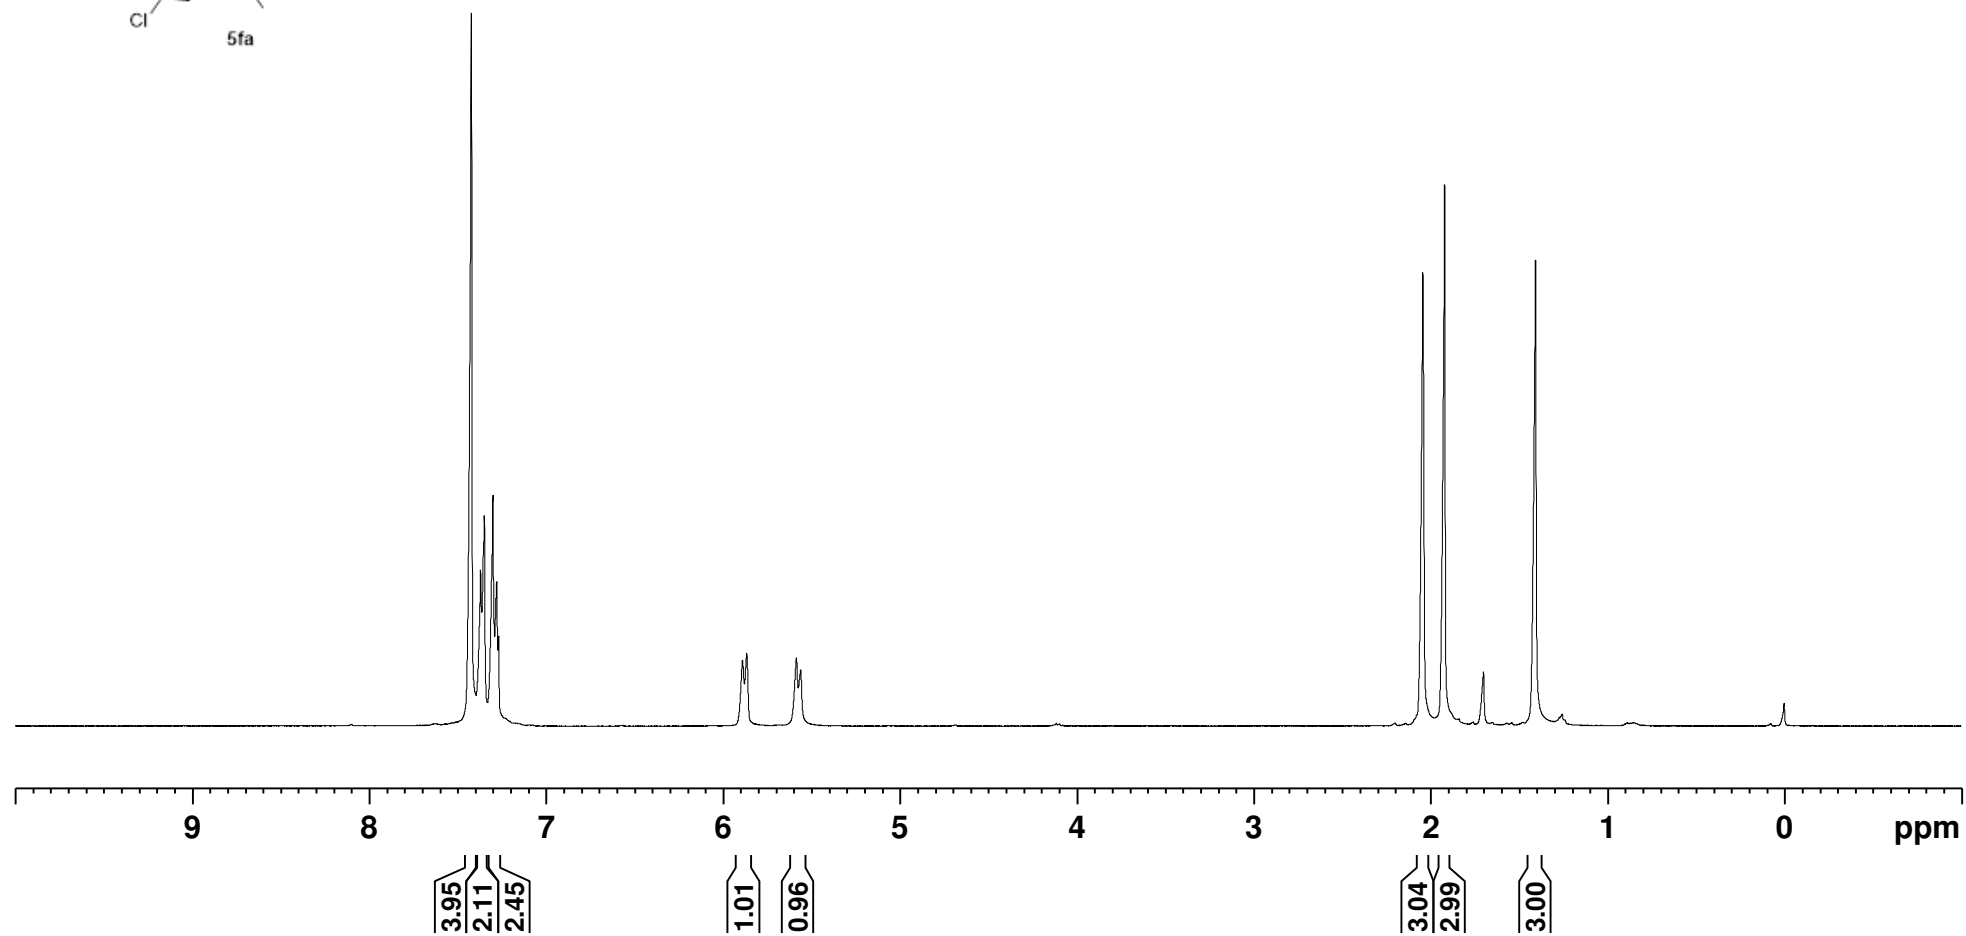

<sup>13</sup>C NMR (100 MHz, CDCl<sub>3</sub>)

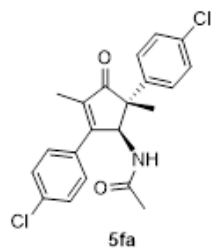

— 208.75  
— 170.15  
— 161.05  
141.97  
137.23  
136.43  
133.04  
131.54  
129.89  
129.29  
128.93  
128.06  
77.48  
77.16  
76.84  
60.52  
54.25  
23.16  
21.30  
10.63

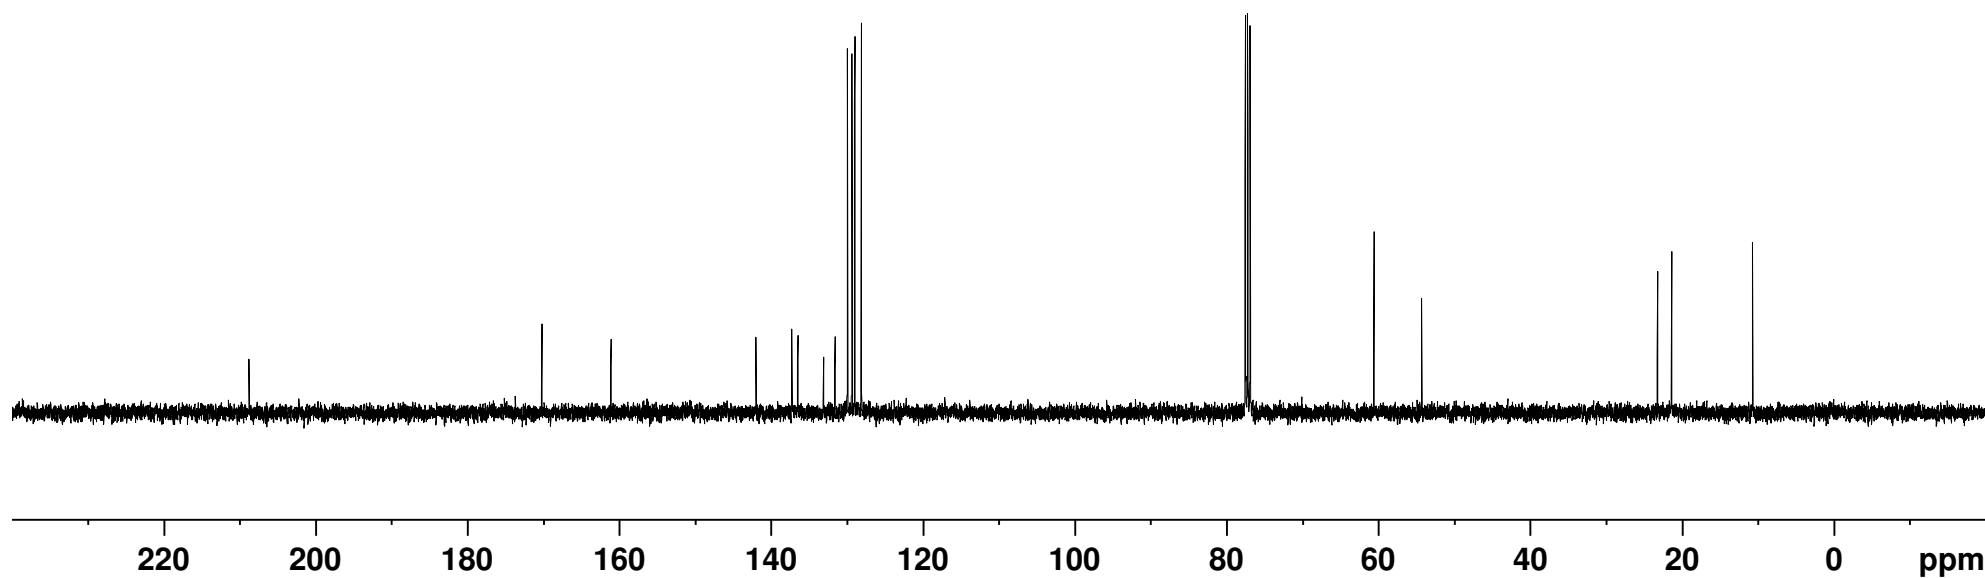

$^1\text{H}$  NMR (400 MHz,  $\text{CDCl}_3$ )

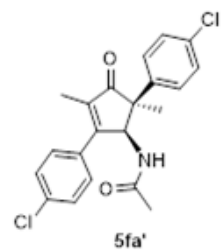

7.438  
7.296  
7.274  
7.264  
7.088  
7.067

5.691  
5.686  
5.665  
5.660

4.675  
4.649

2.101  
2.097  
1.734  
1.527

0.071

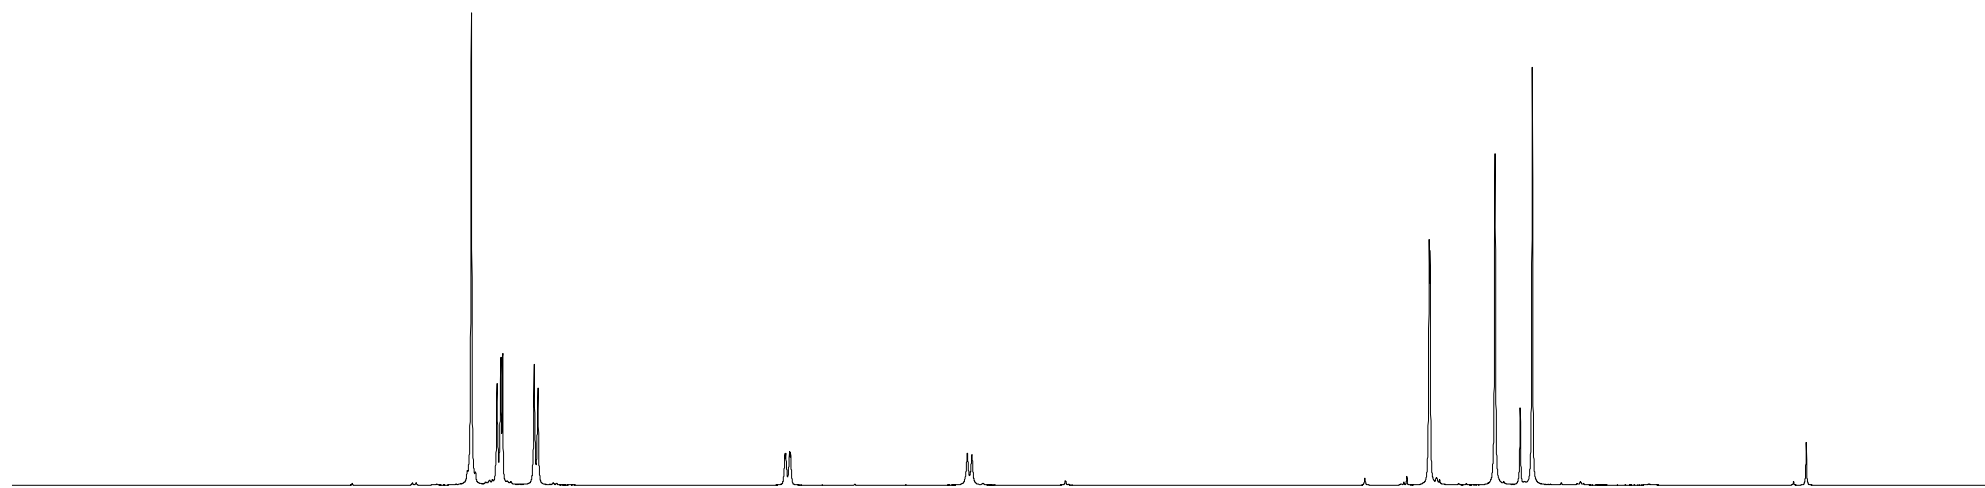

4.08  
2.02  
2.05

3.00  
3.00  
3.02

$^{13}\text{C}$  NMR (100 MHz,  $\text{CDCl}_3$ )

— 209.02

— 170.01

— 161.77

139.33

138.26

136.39

133.30

131.47

130.00

129.24

129.02

128.69

77.48

77.16

76.84

— 60.31

— 55.48

23.97

22.90

— 10.63

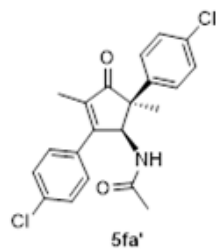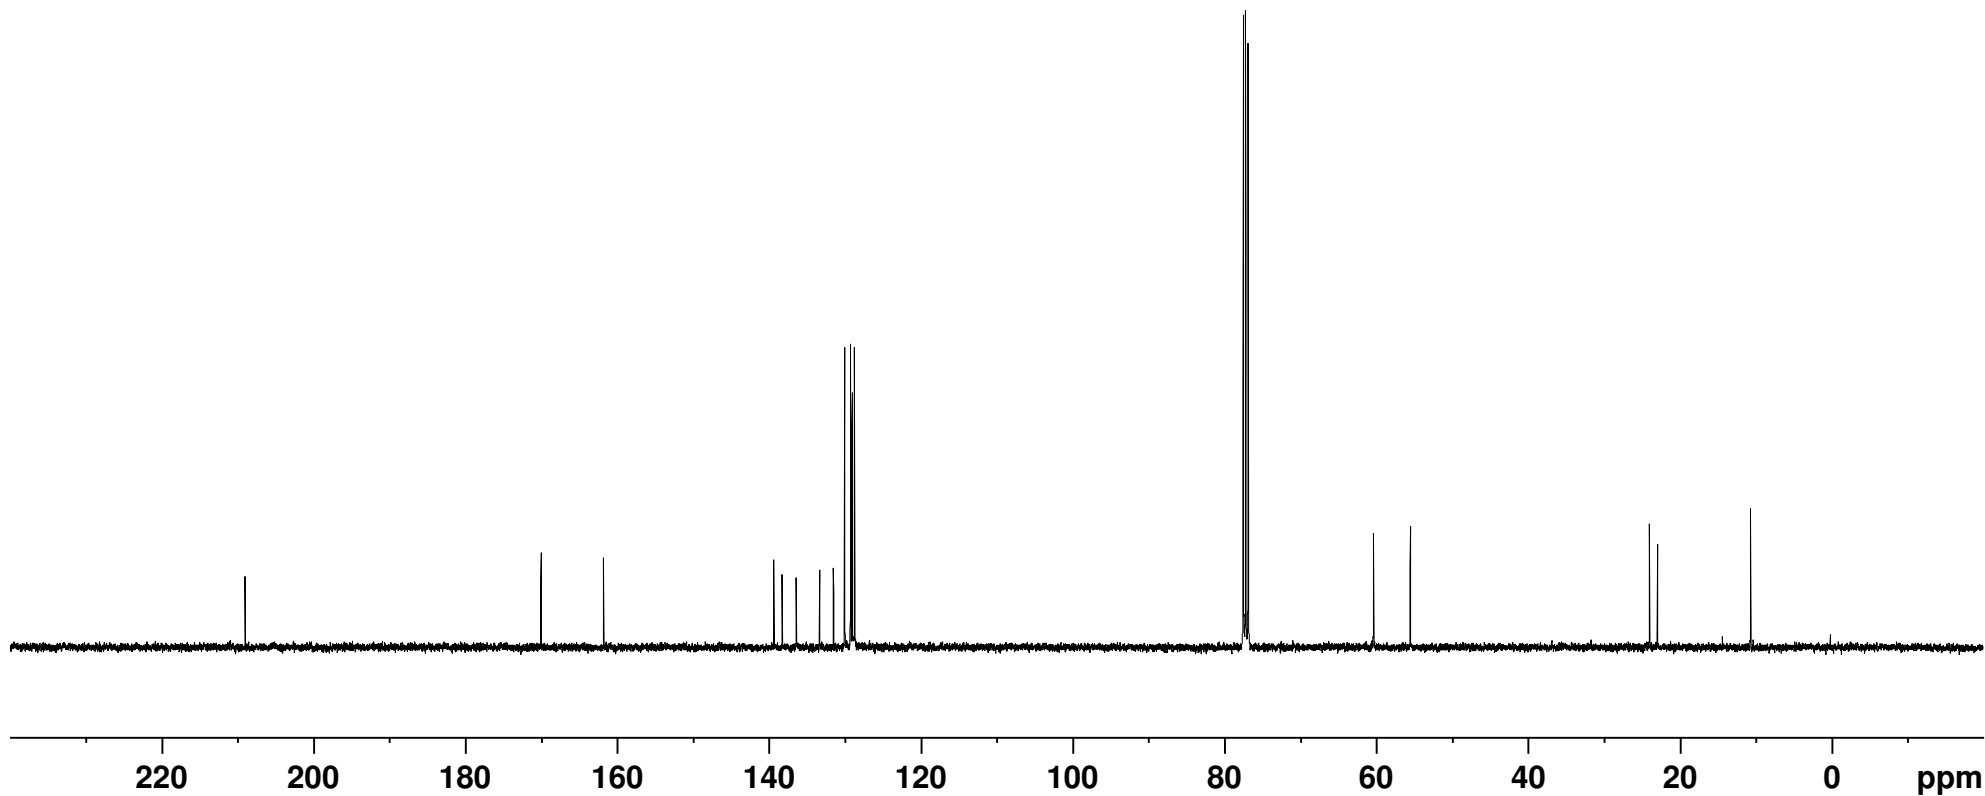

<sup>1</sup>H NMR (400 MHz, CDCl<sub>3</sub>)

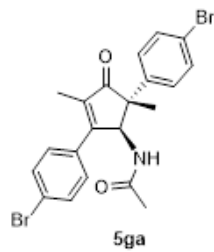

7.594  
7.573  
7.456  
7.435  
7.355  
7.334  
7.311  
7.290  
7.267

5.886  
5.881  
5.861  
5.857  
5.550  
5.525

2.036  
2.032  
1.924

1.402

0.073  
-0.000

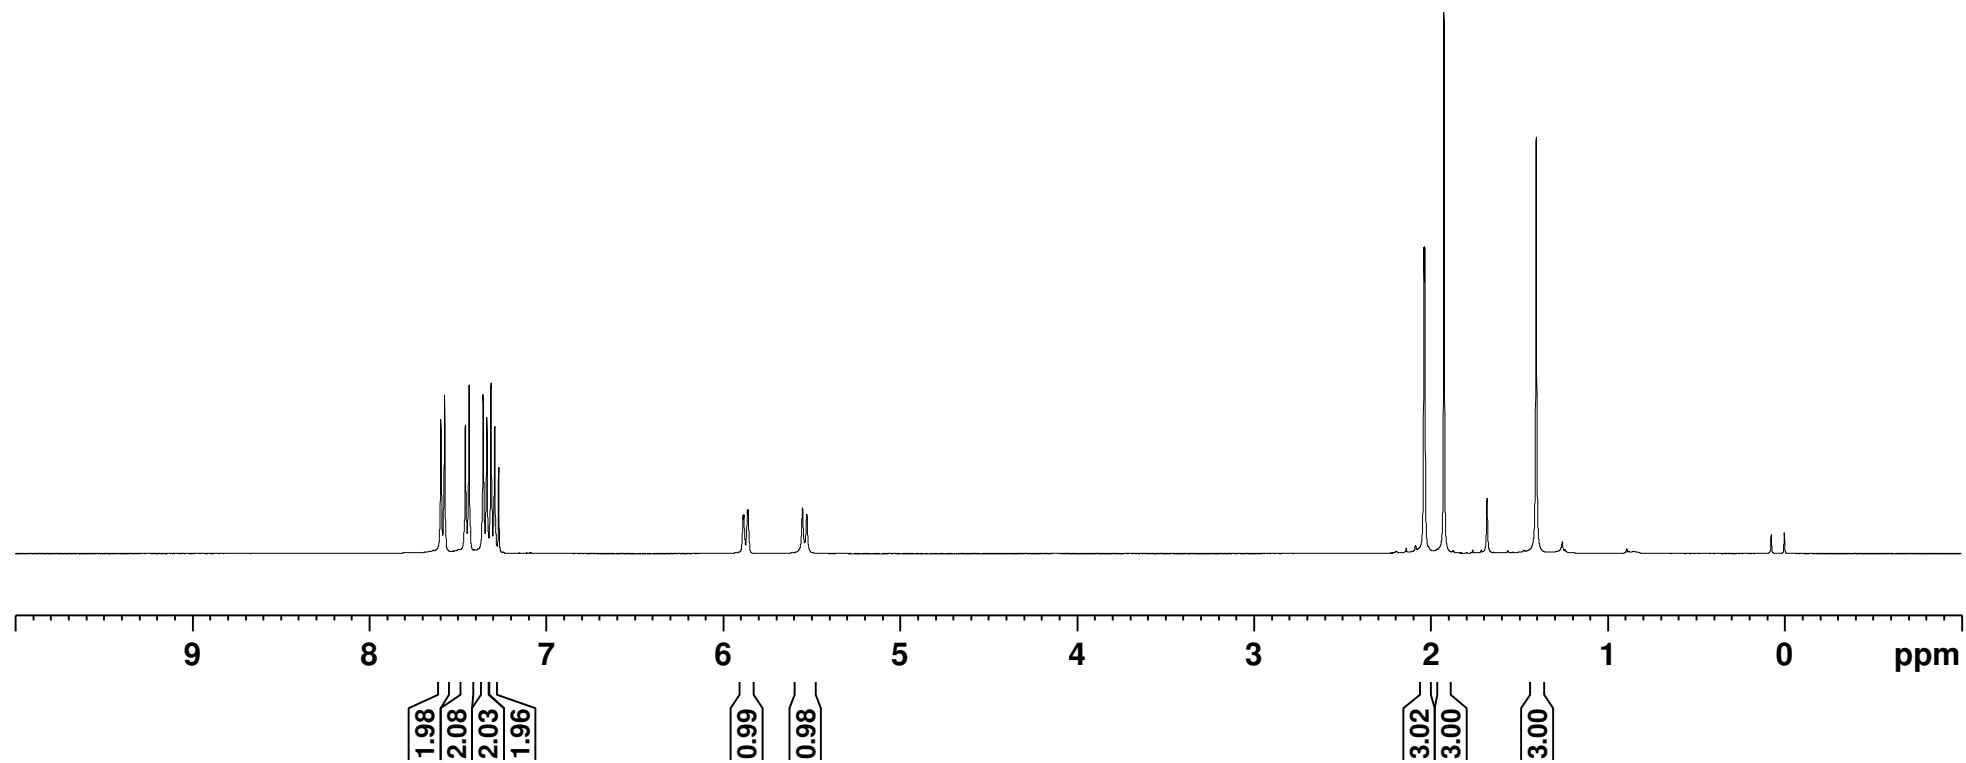

<sup>13</sup>C NMR (100 MHz, CDCl<sub>3</sub>)

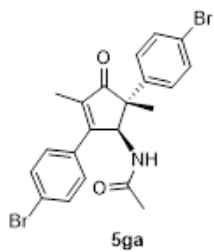

208.67  
170.15  
161.11  
142.48  
137.31  
132.27  
131.98  
131.90  
130.08  
128.43  
124.82  
121.24  
77.48  
77.16  
76.84  
60.40  
54.33  
23.18  
21.26  
10.64

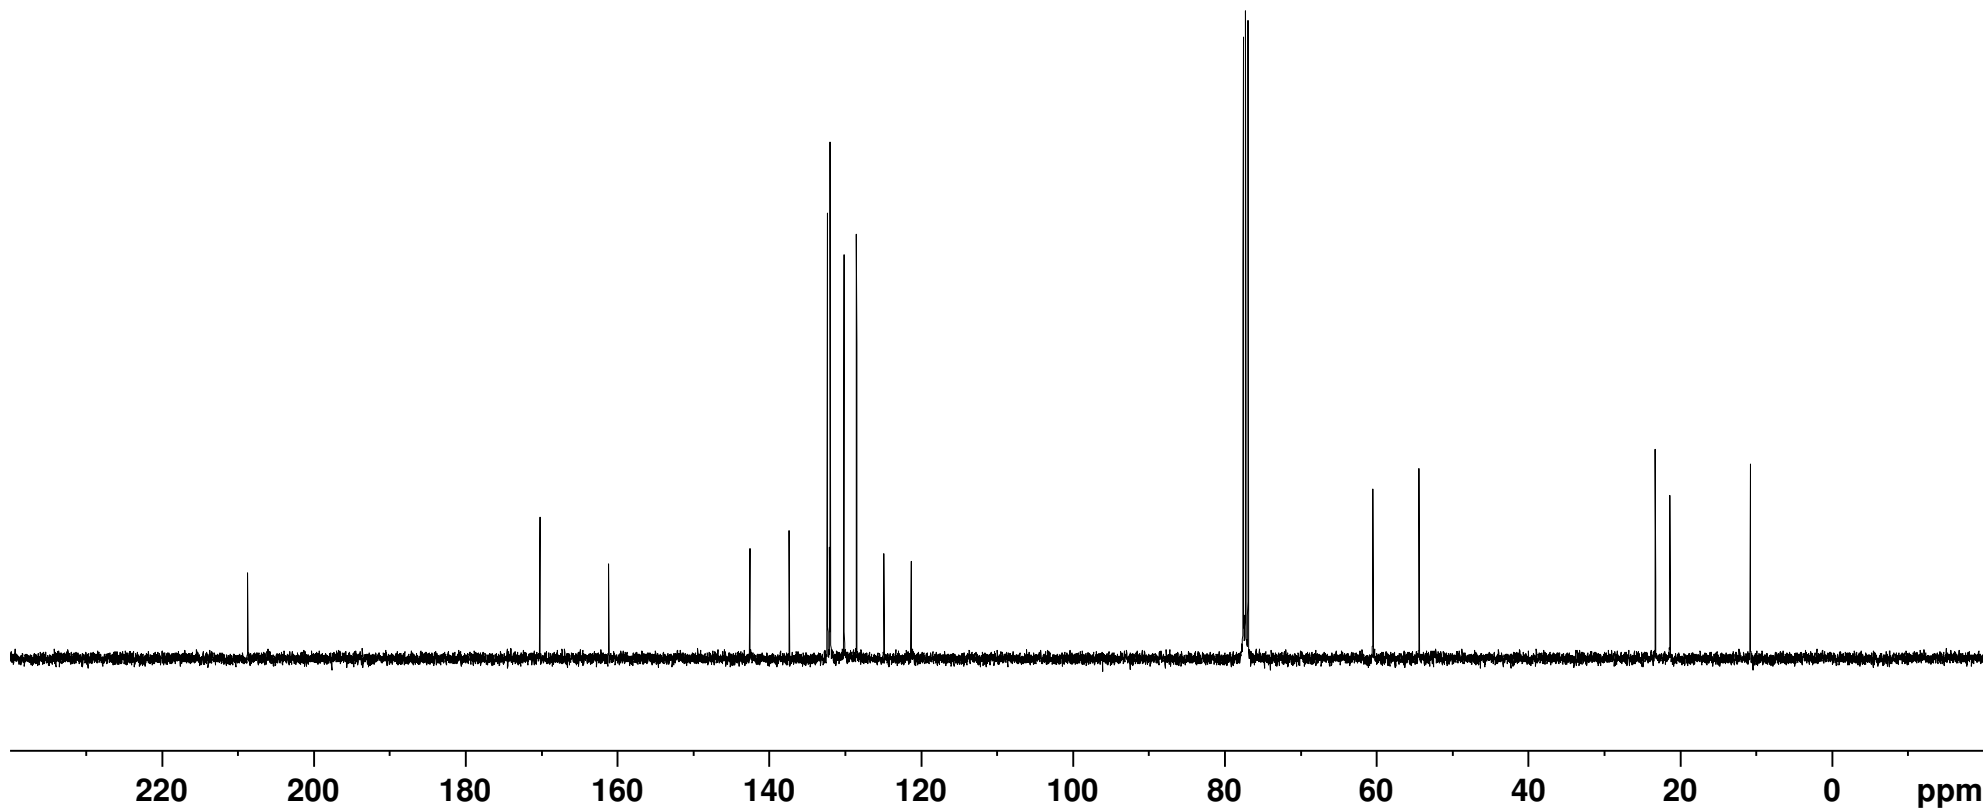

<sup>1</sup>H NMR (400 MHz, CDCl<sub>3</sub>)

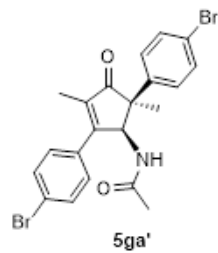

7.600  
7.579  
7.445  
7.423  
7.376  
7.355  
7.267  
7.024  
7.003

5.686  
5.682  
5.661  
5.657

4.712  
4.686

2.089  
2.086  
1.726  
1.529

0.071  
-0.000

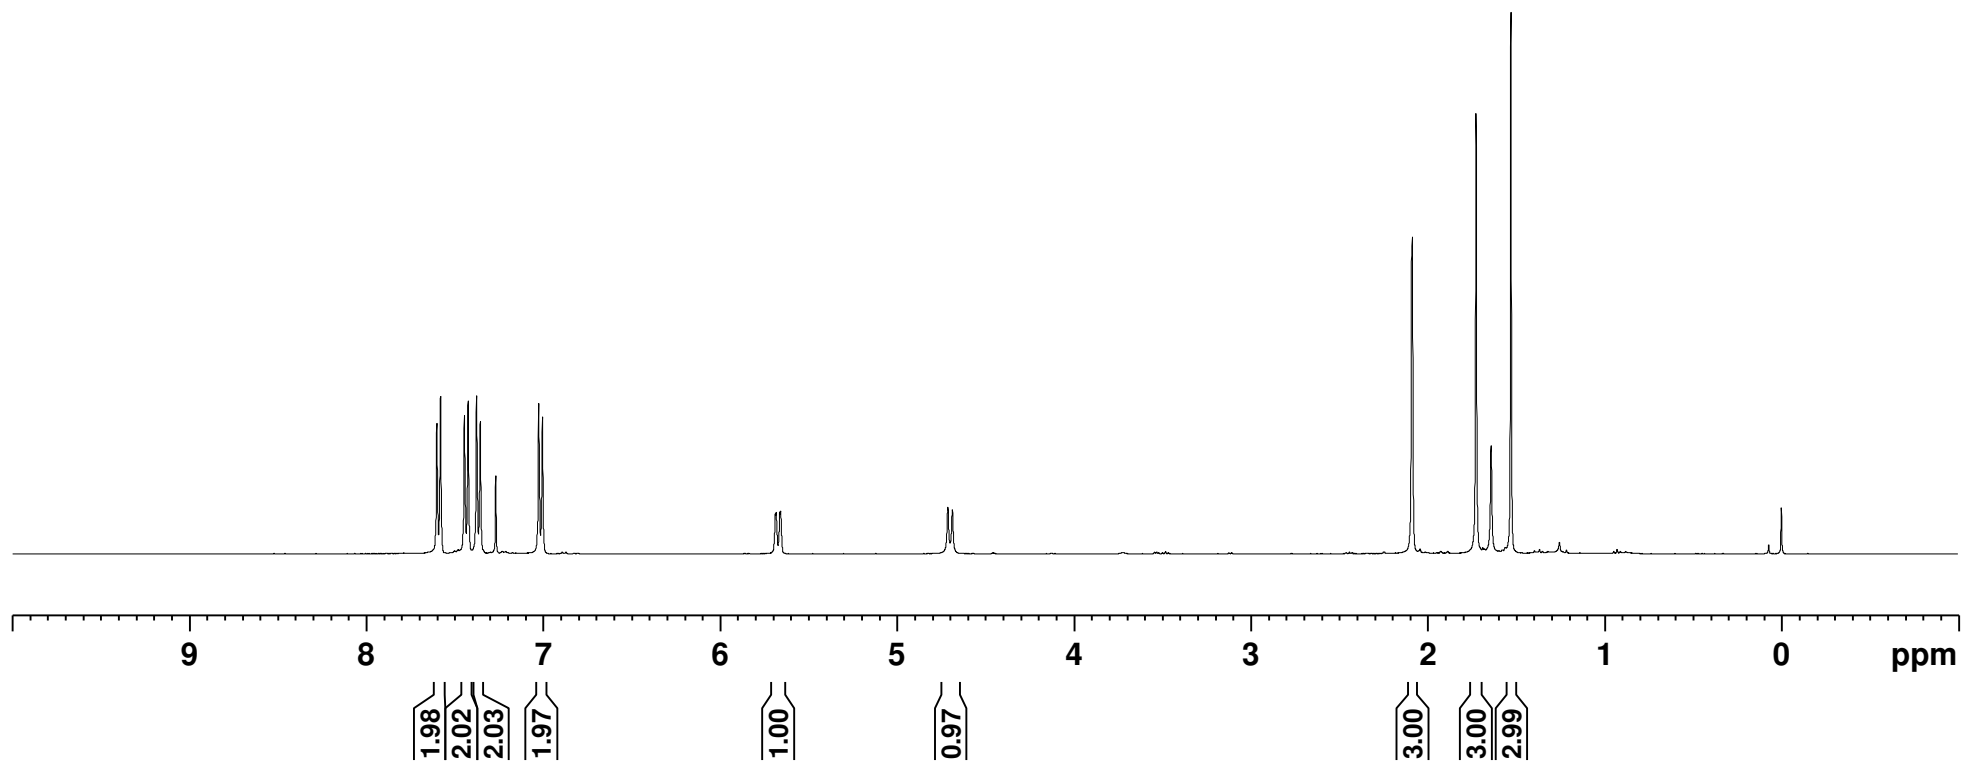



<sup>13</sup>C NMR (100 MHz, CDCl<sub>3</sub>)

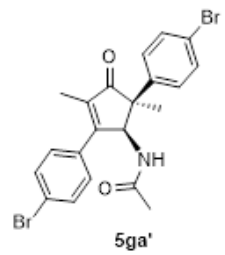

— 208.94  
— 170.04  
— 161.85  
139.85  
138.35  
132.21  
131.92  
131.67  
130.18  
129.37  
124.78  
121.44  
77.48  
77.16  
76.84  
60.24  
55.58  
23.90  
22.92  
10.63

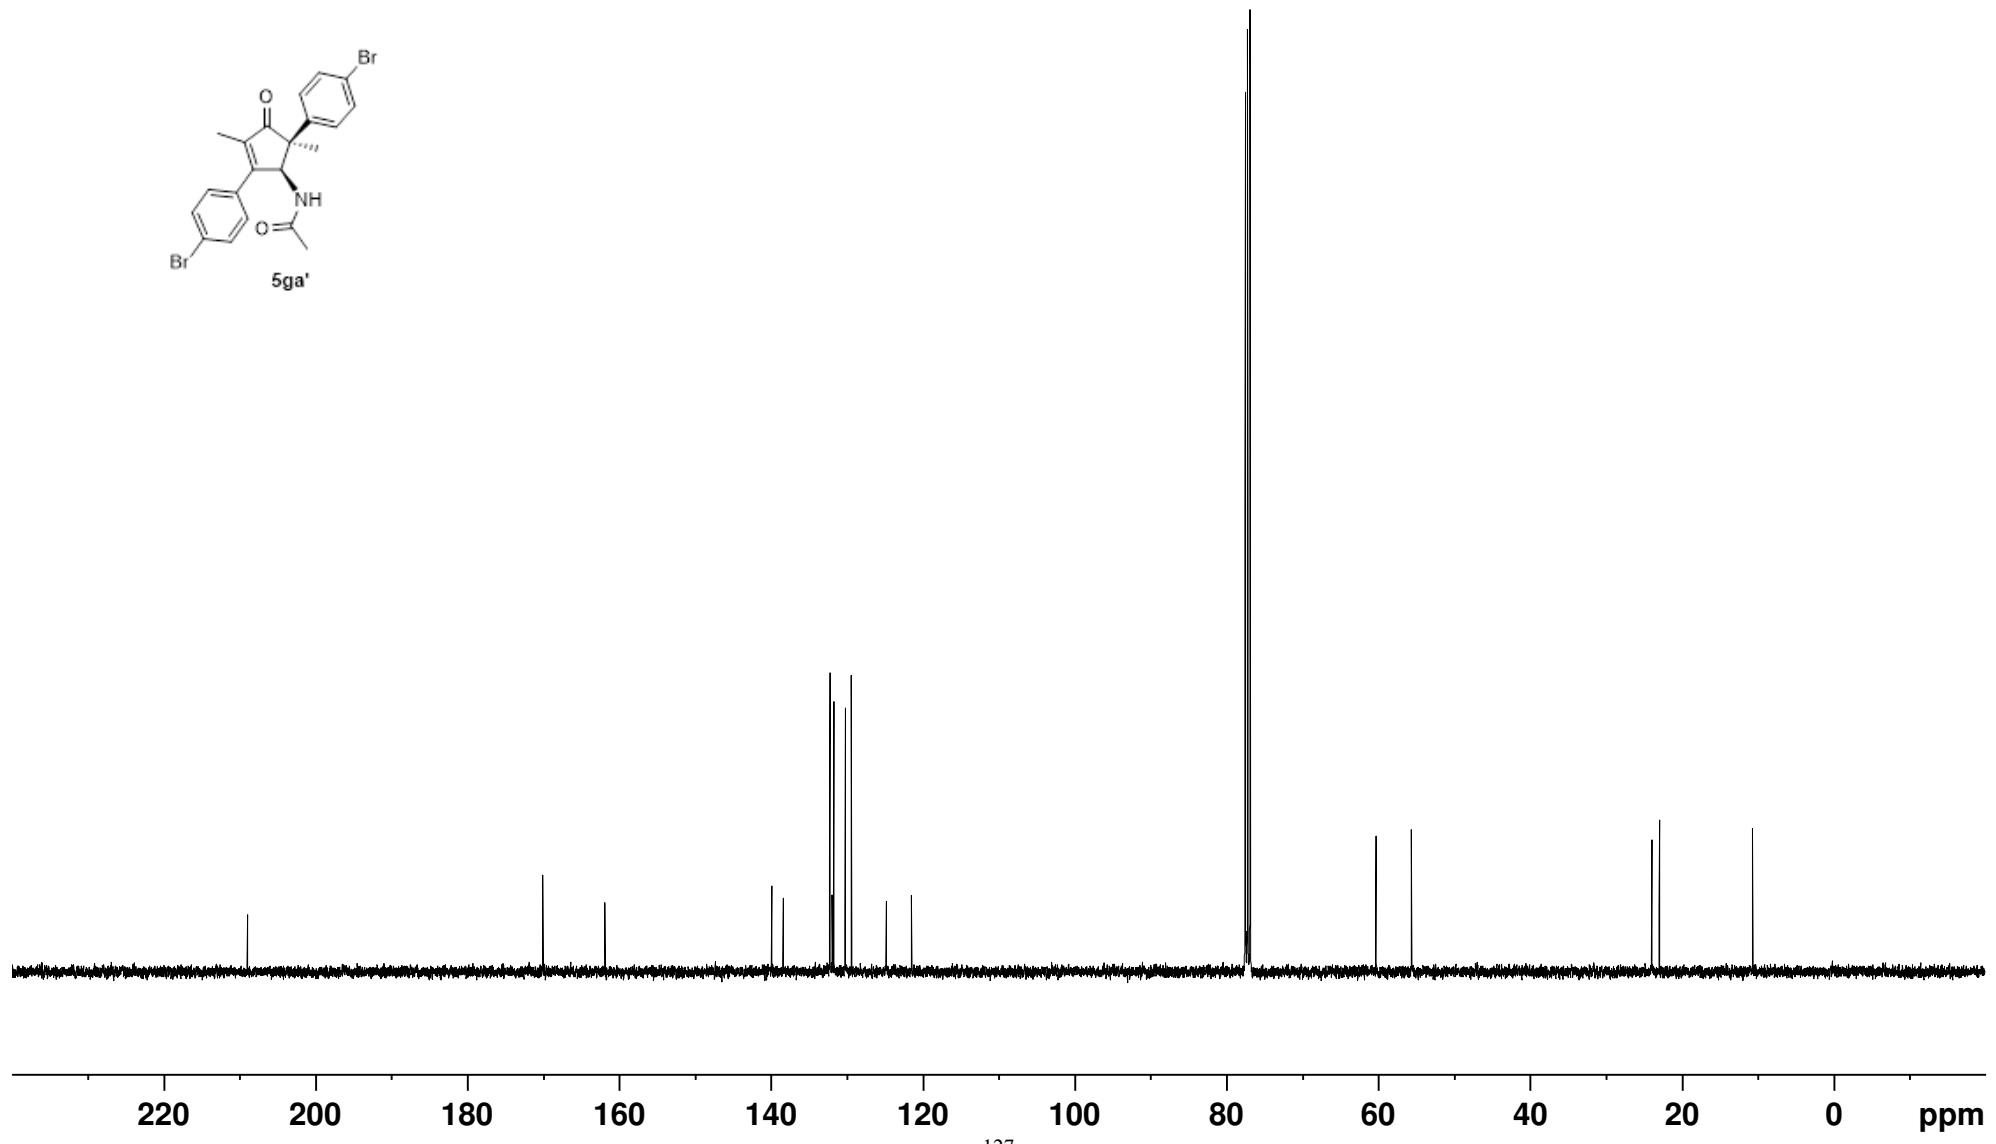

<sup>1</sup>H NMR (400 MHz, CDCl<sub>3</sub>)

7.447  
7.441  
7.425  
7.417  
7.410  
7.400  
7.381  
7.380  
7.365  
7.360  
7.354  
7.294  
7.290  
7.270  
7.263  
7.244  
7.141  
7.121  
5.929  
5.924  
5.904  
5.900  
5.871  
5.866  
5.847  
5.842  
5.518  
5.493

2.396  
2.307  
2.064  
2.060  
2.042  
2.038  
1.918  
1.416  
1.406

— -0.000

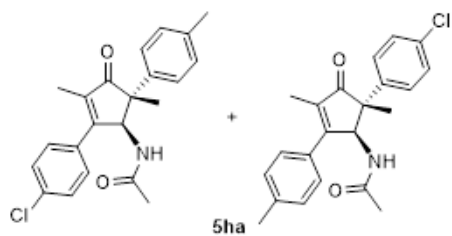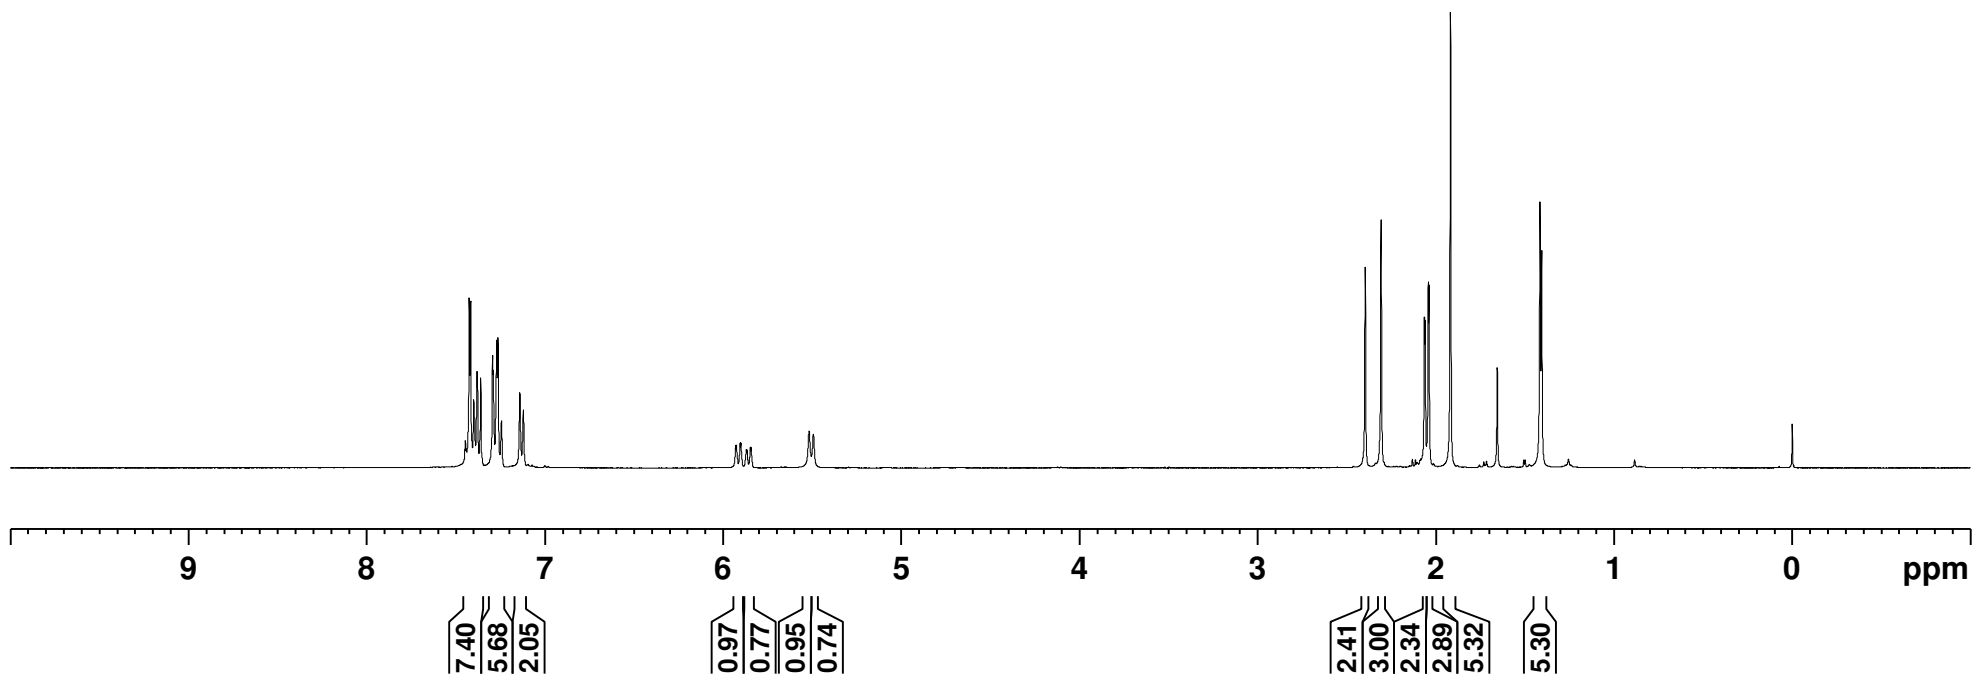

# <sup>13</sup>C NMR (100 MHz, CDCl<sub>3</sub>)

209.45  
209.12

170.16  
170.05

162.35  
160.89

142.34  
140.84  
140.55  
137.26  
136.73  
136.29  
136.20  
132.87  
131.80  
130.21  
129.93  
129.70  
129.54  
129.20  
128.85  
128.62  
128.12  
126.33

77.47  
77.16  
76.84

60.74

54.36  
54.25

23.23  
23.19  
21.61  
21.08  
21.05

10.75  
10.67

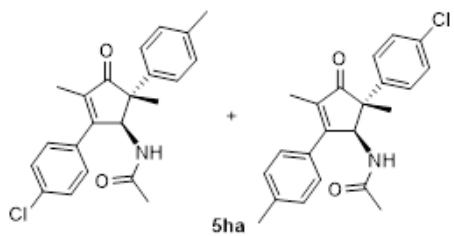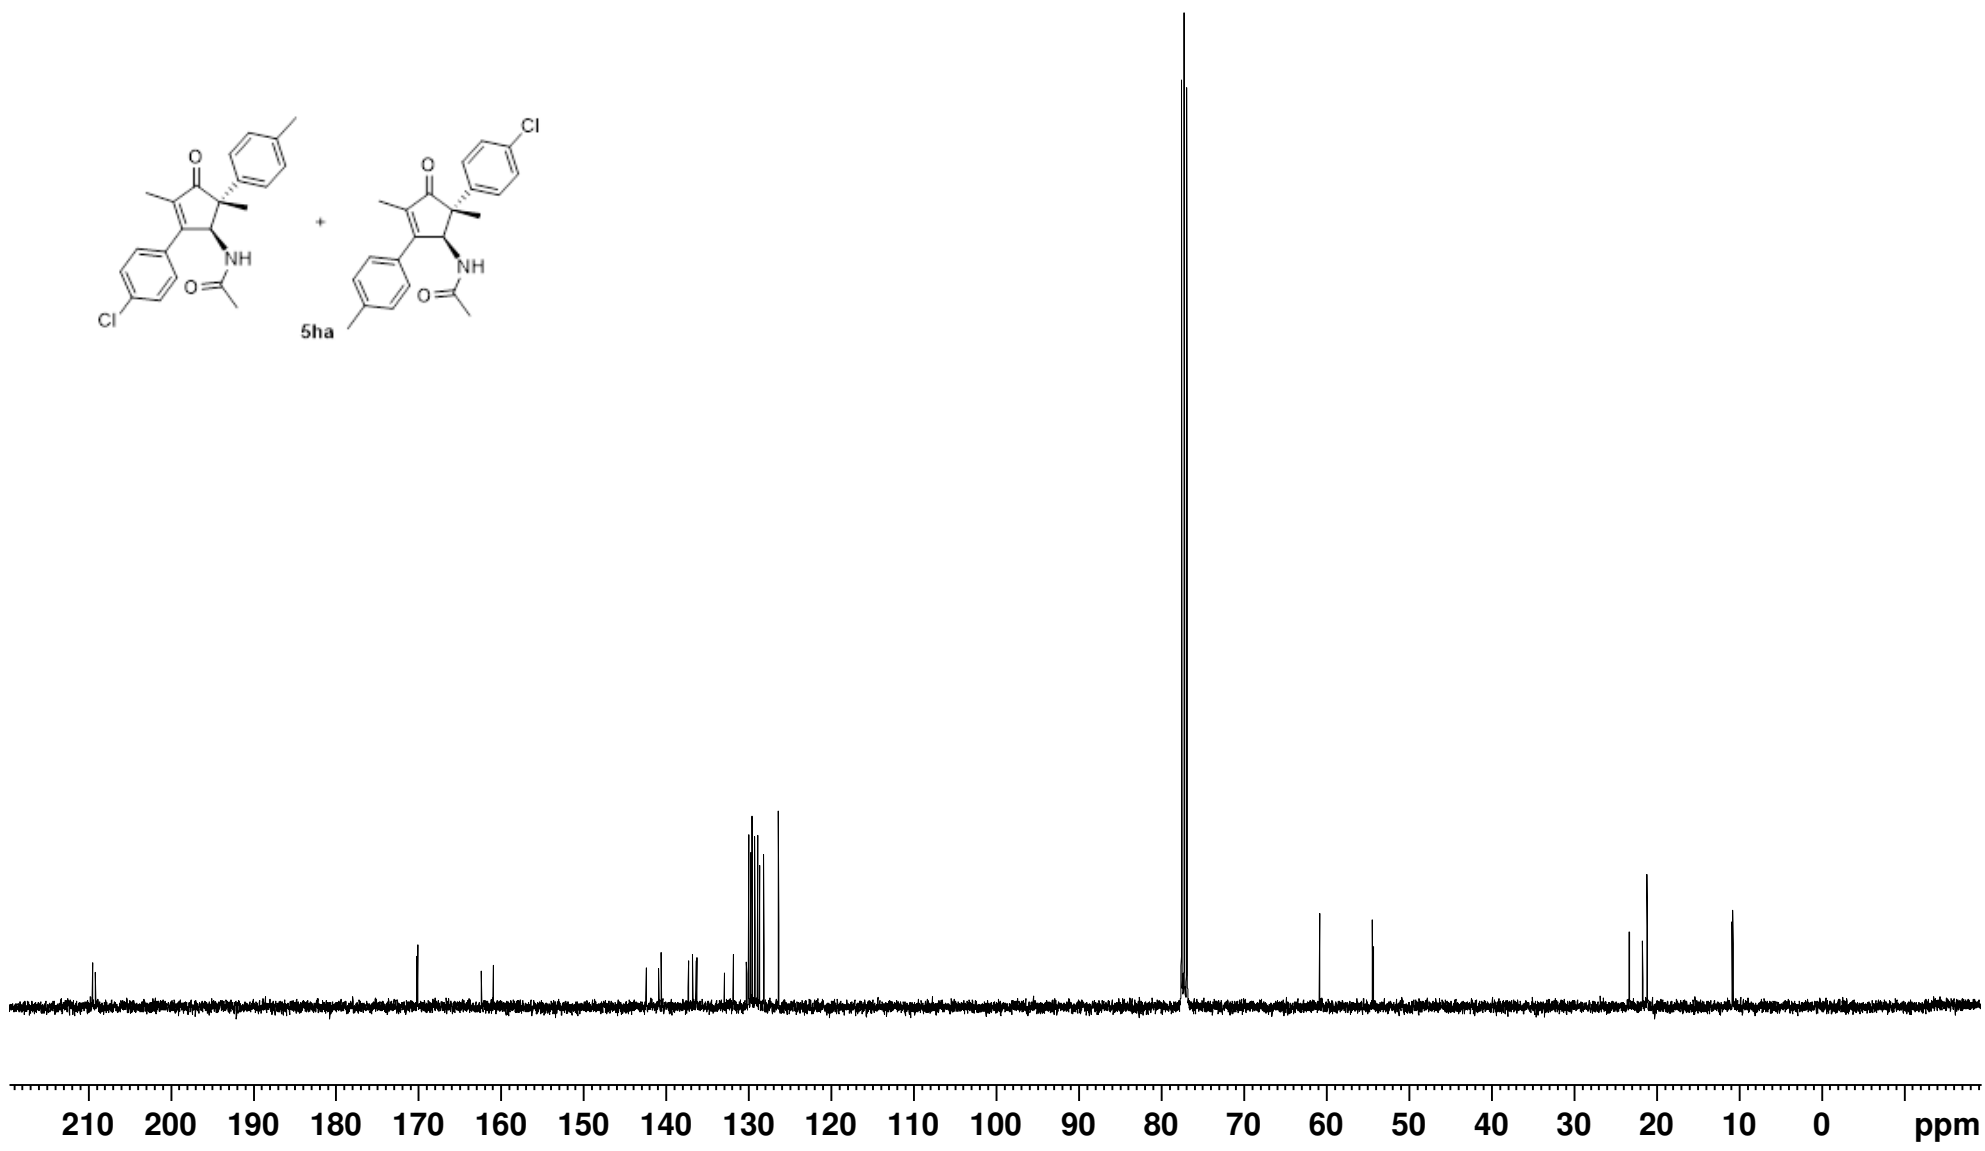

$^1\text{H}$  NMR (600 MHz,  $\text{CDCl}_3$ )

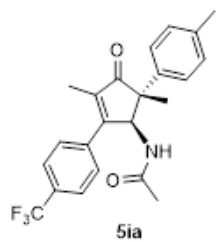

7.685  
7.671  
7.578  
7.564  
7.280  
7.266  
7.262  
7.141  
7.128  
5.966  
5.963  
5.949  
5.946  
5.743  
5.726

2.311  
2.028  
2.025  
1.881  
1.420

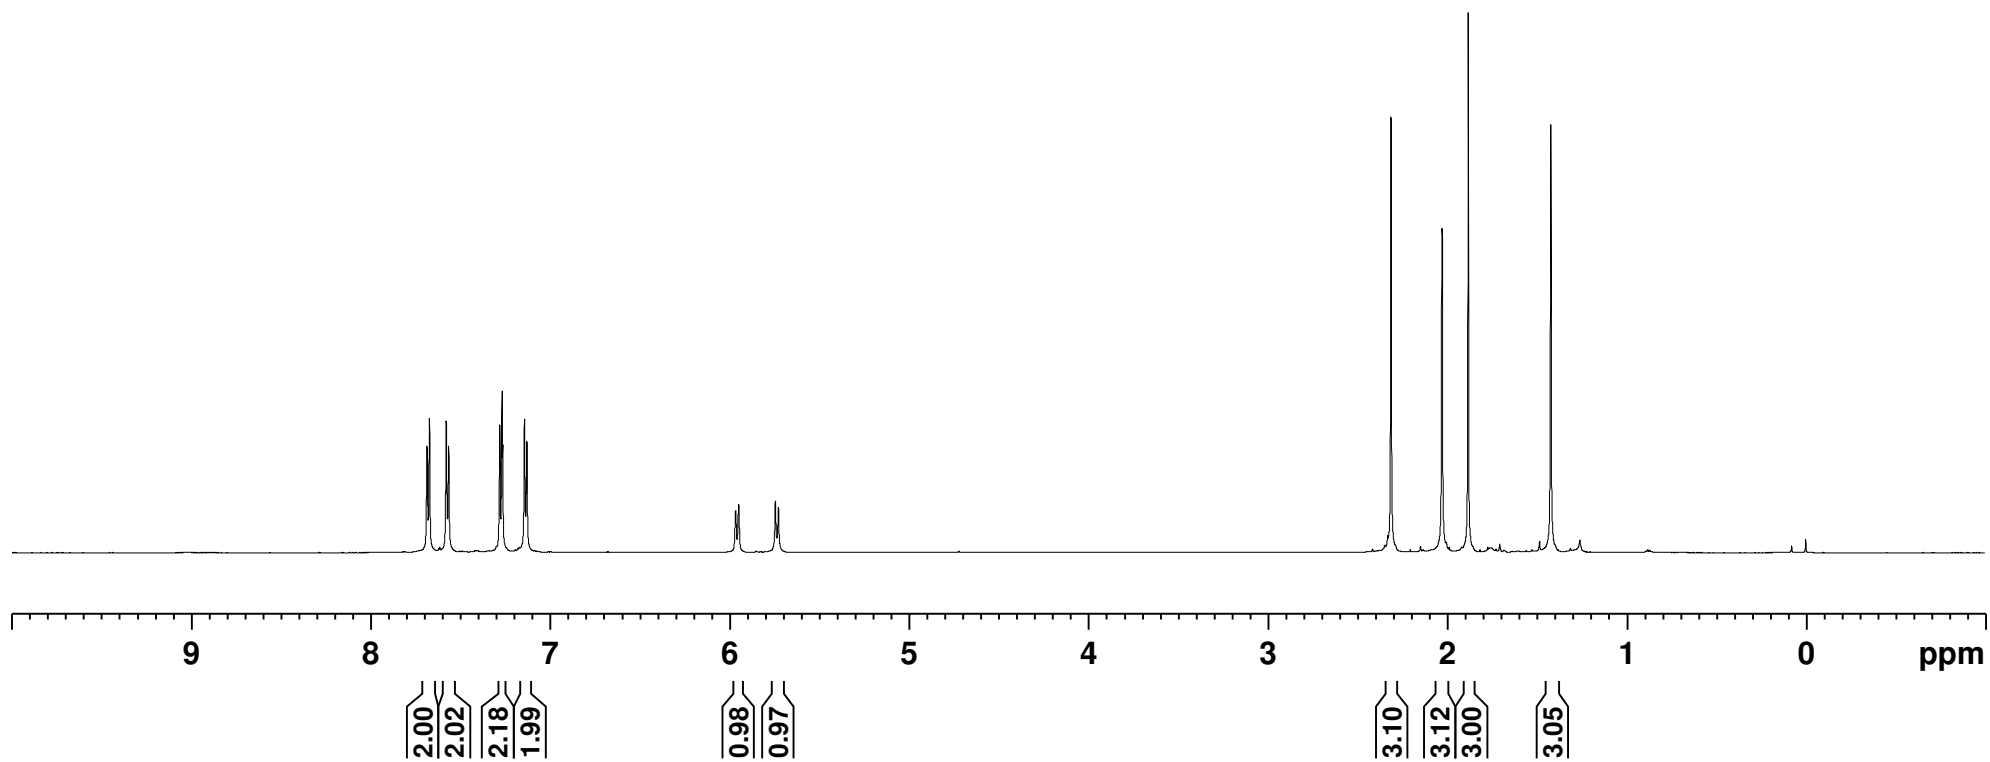

<sup>13</sup>C NMR (150 MHz, CDCl<sub>3</sub>)

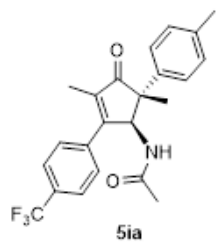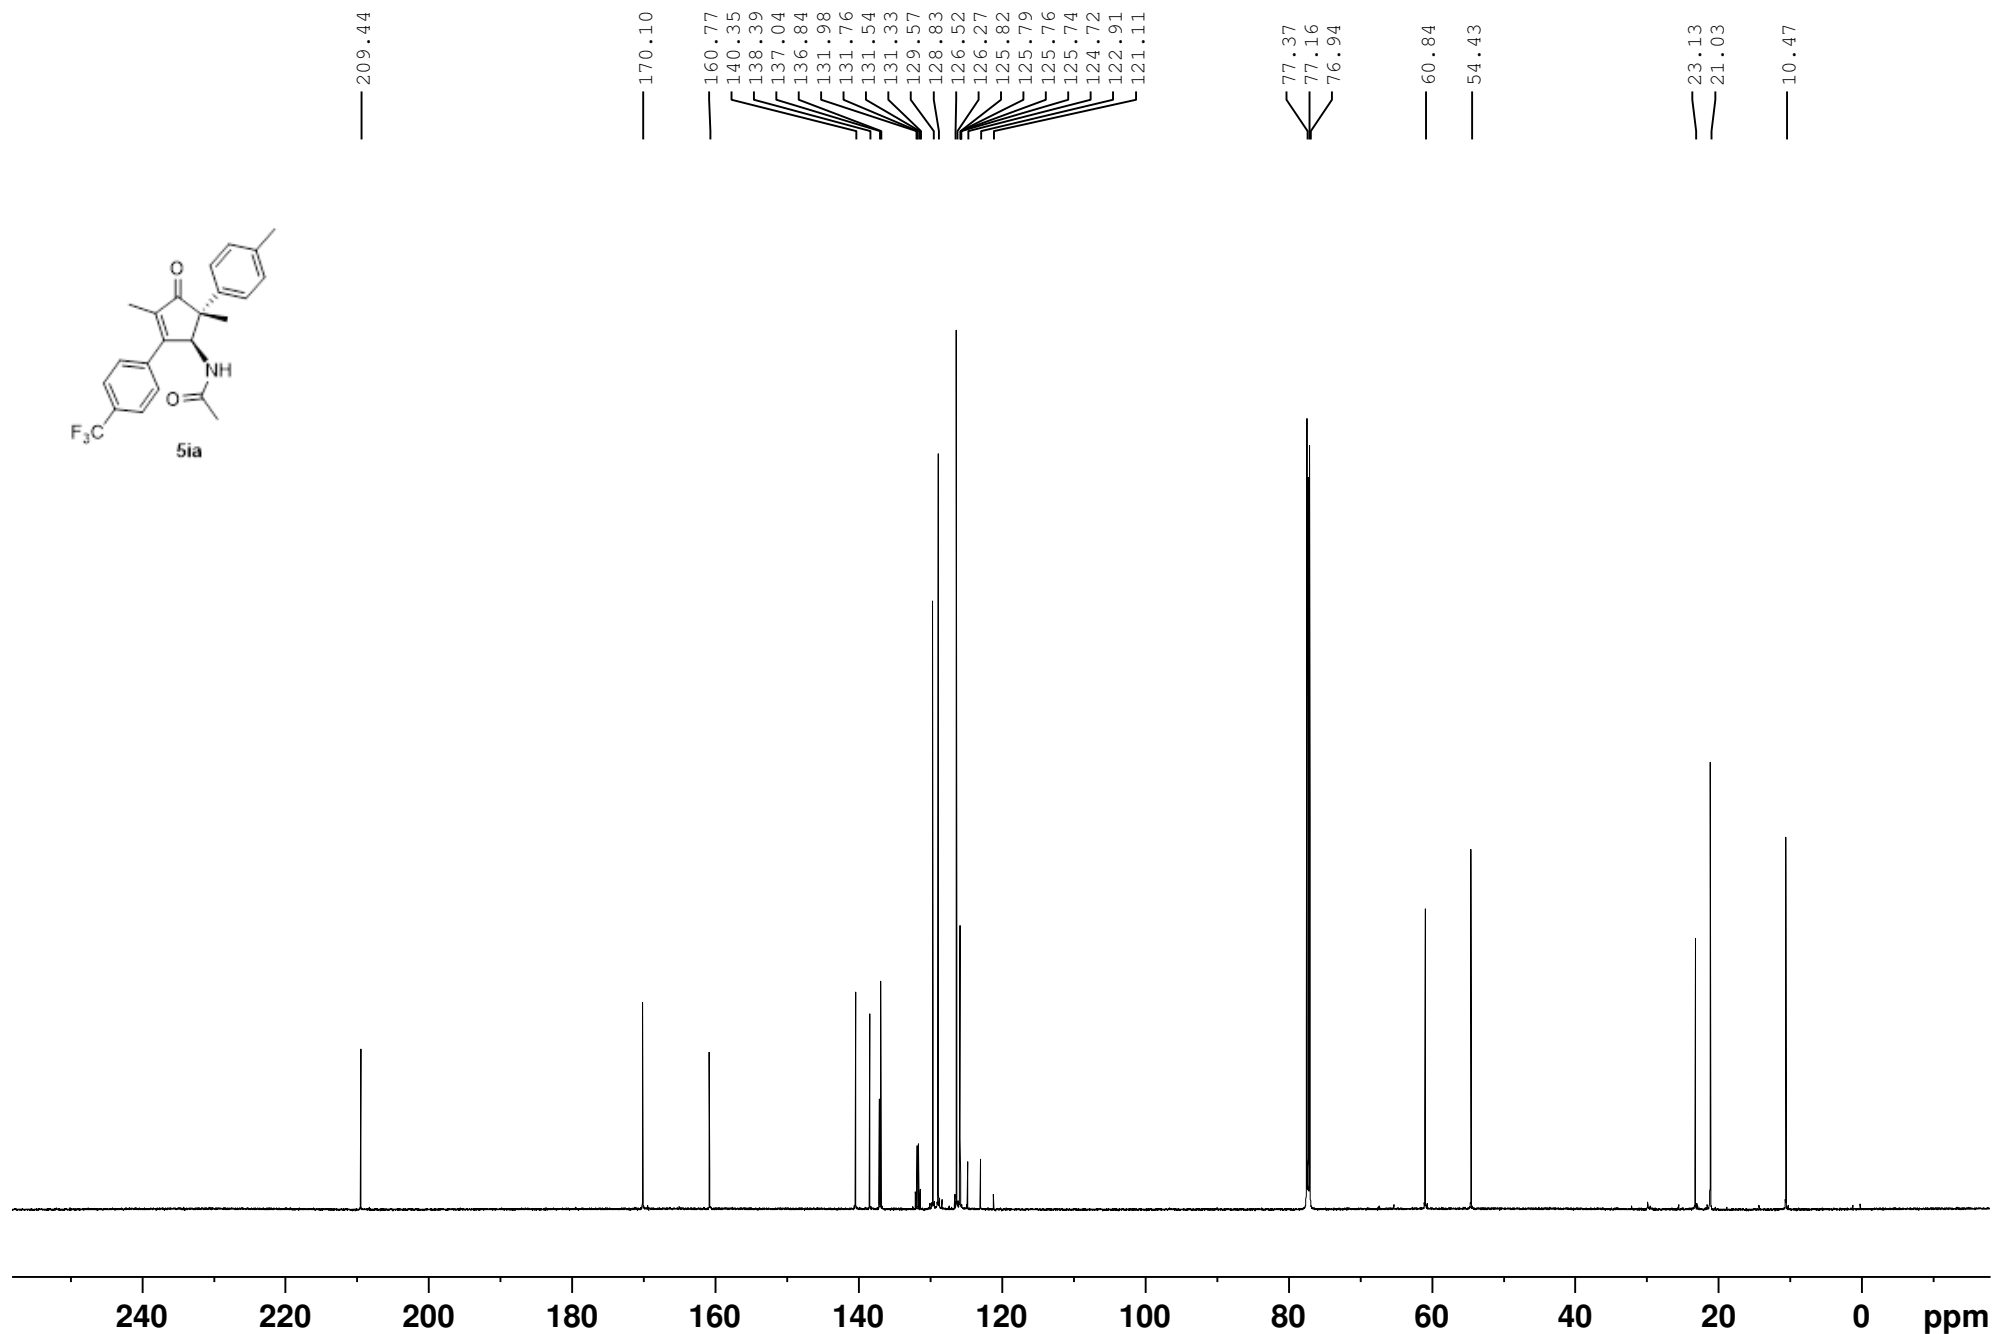

**<sup>19</sup>F NMR (376 MHz, CDCl<sub>3</sub>)**

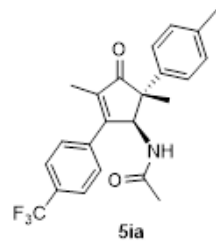

-62.889

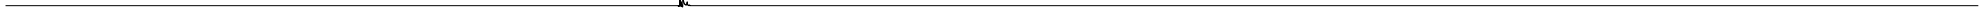

0 -20 -40 -60 -80 -100 -120 -140 -160 -180 -200 ppm

# NOESY (400 MHz, CDCl<sub>3</sub>)

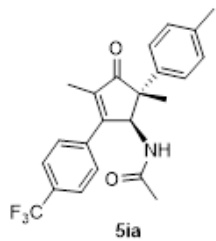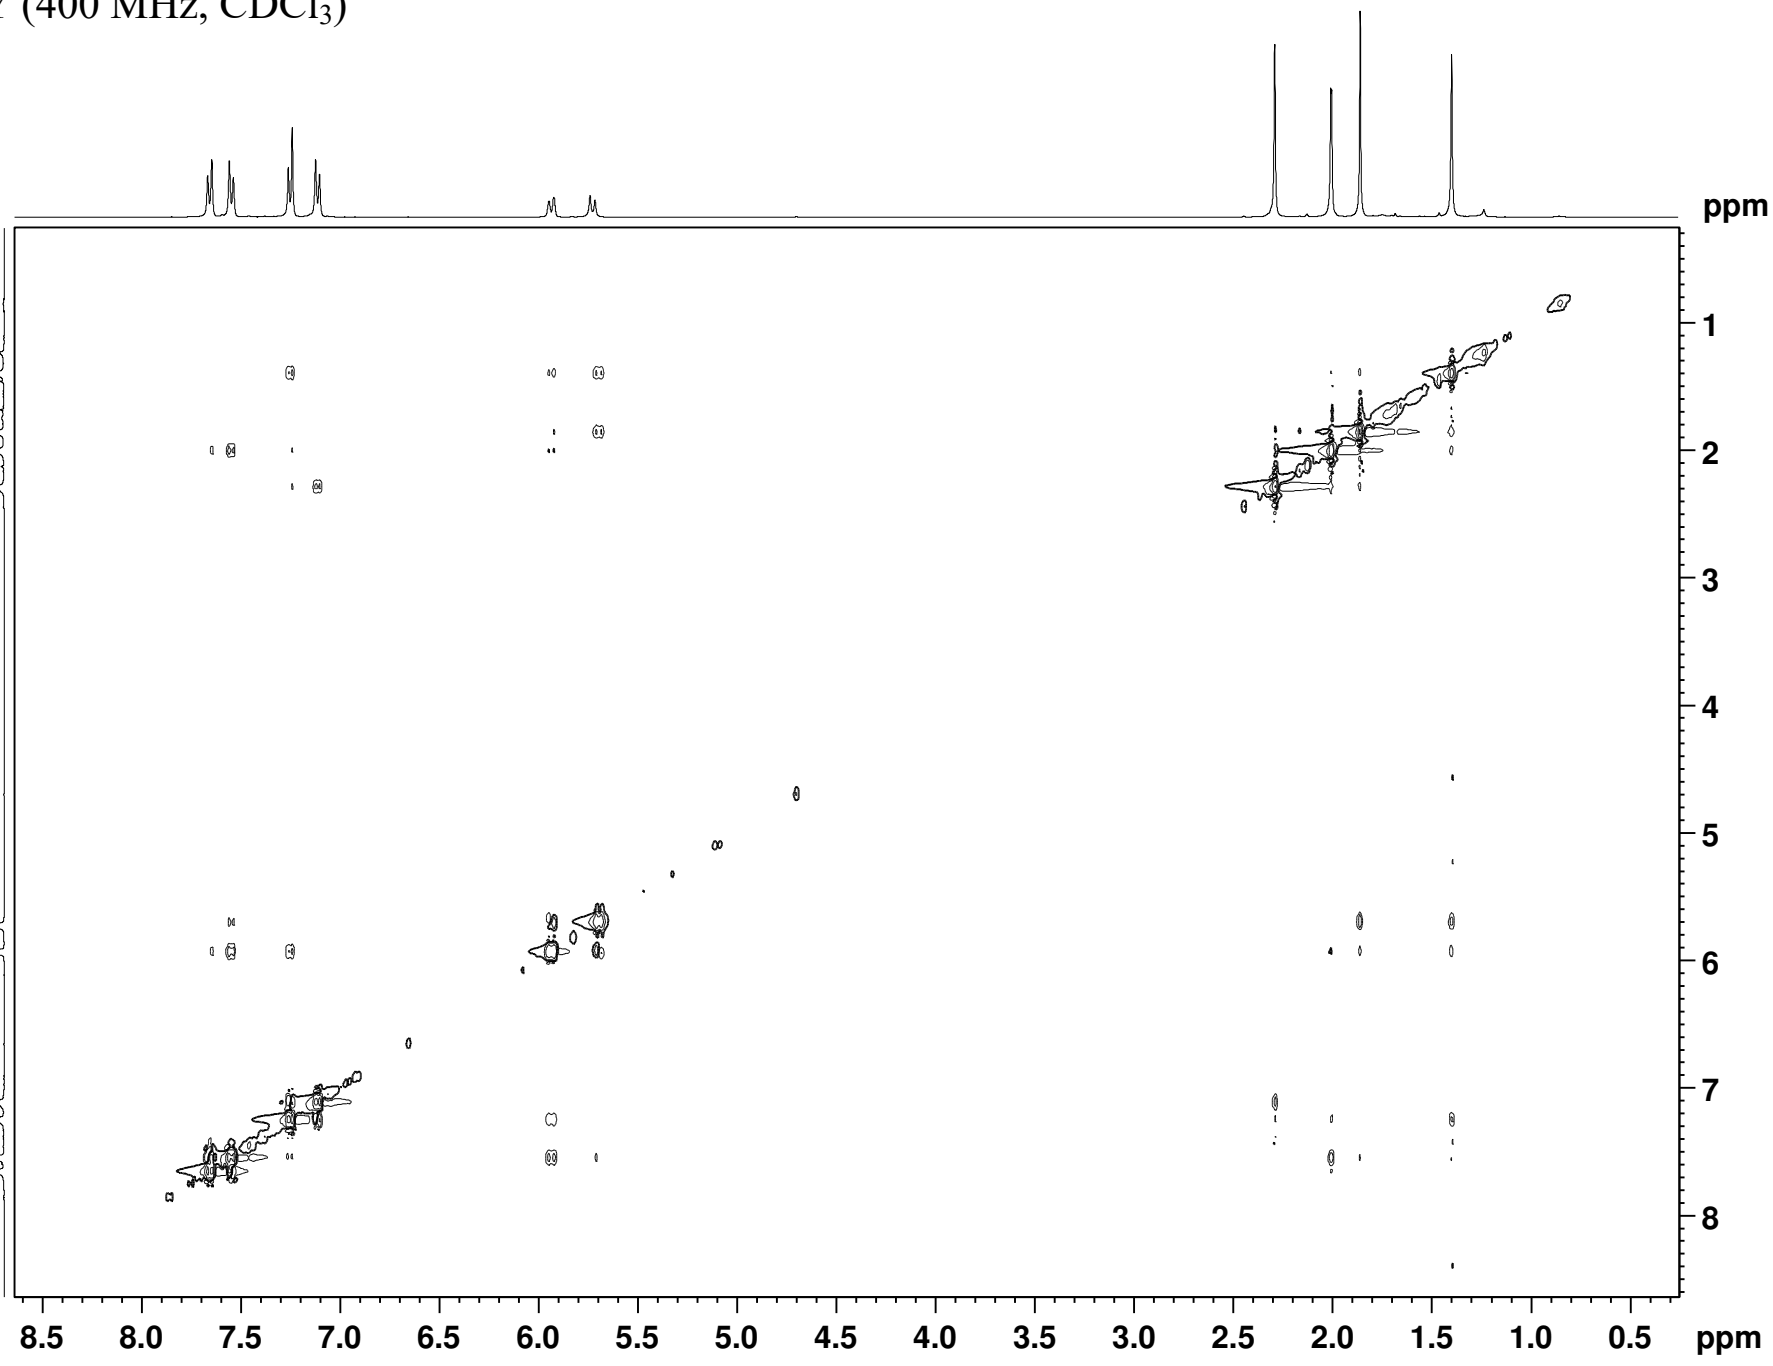

<sup>1</sup>H NMR (400 MHz, CDCl<sub>3</sub>)

7.836  
7.817  
7.705  
7.702  
7.684  
7.667  
7.665  
7.550  
7.531  
7.524  
7.505  
7.487  
7.391  
7.388  
7.368  
7.319  
7.314  
7.301  
7.281  
7.262  
7.233  
7.220  
7.215  
7.197  
5.967  
5.944  
5.889  
5.866

— 2.084

— 1.484

— 0.000

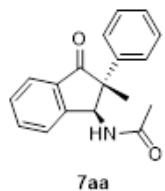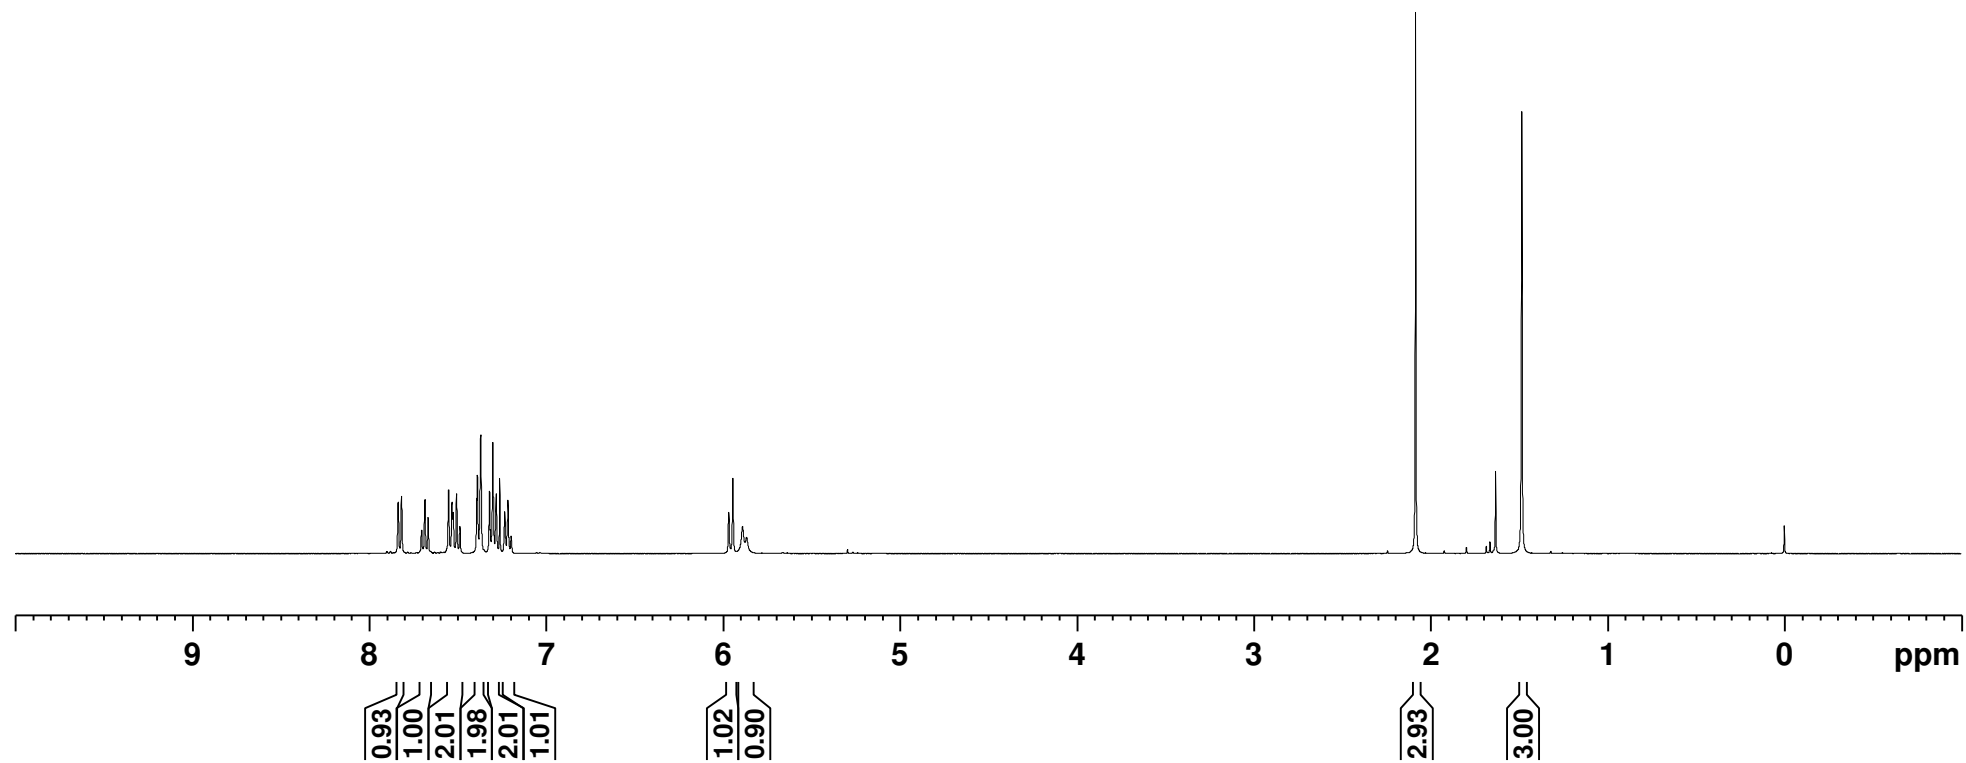



**<sup>13</sup>C NMR (150 MHz, CDCl<sub>3</sub>)**

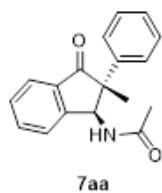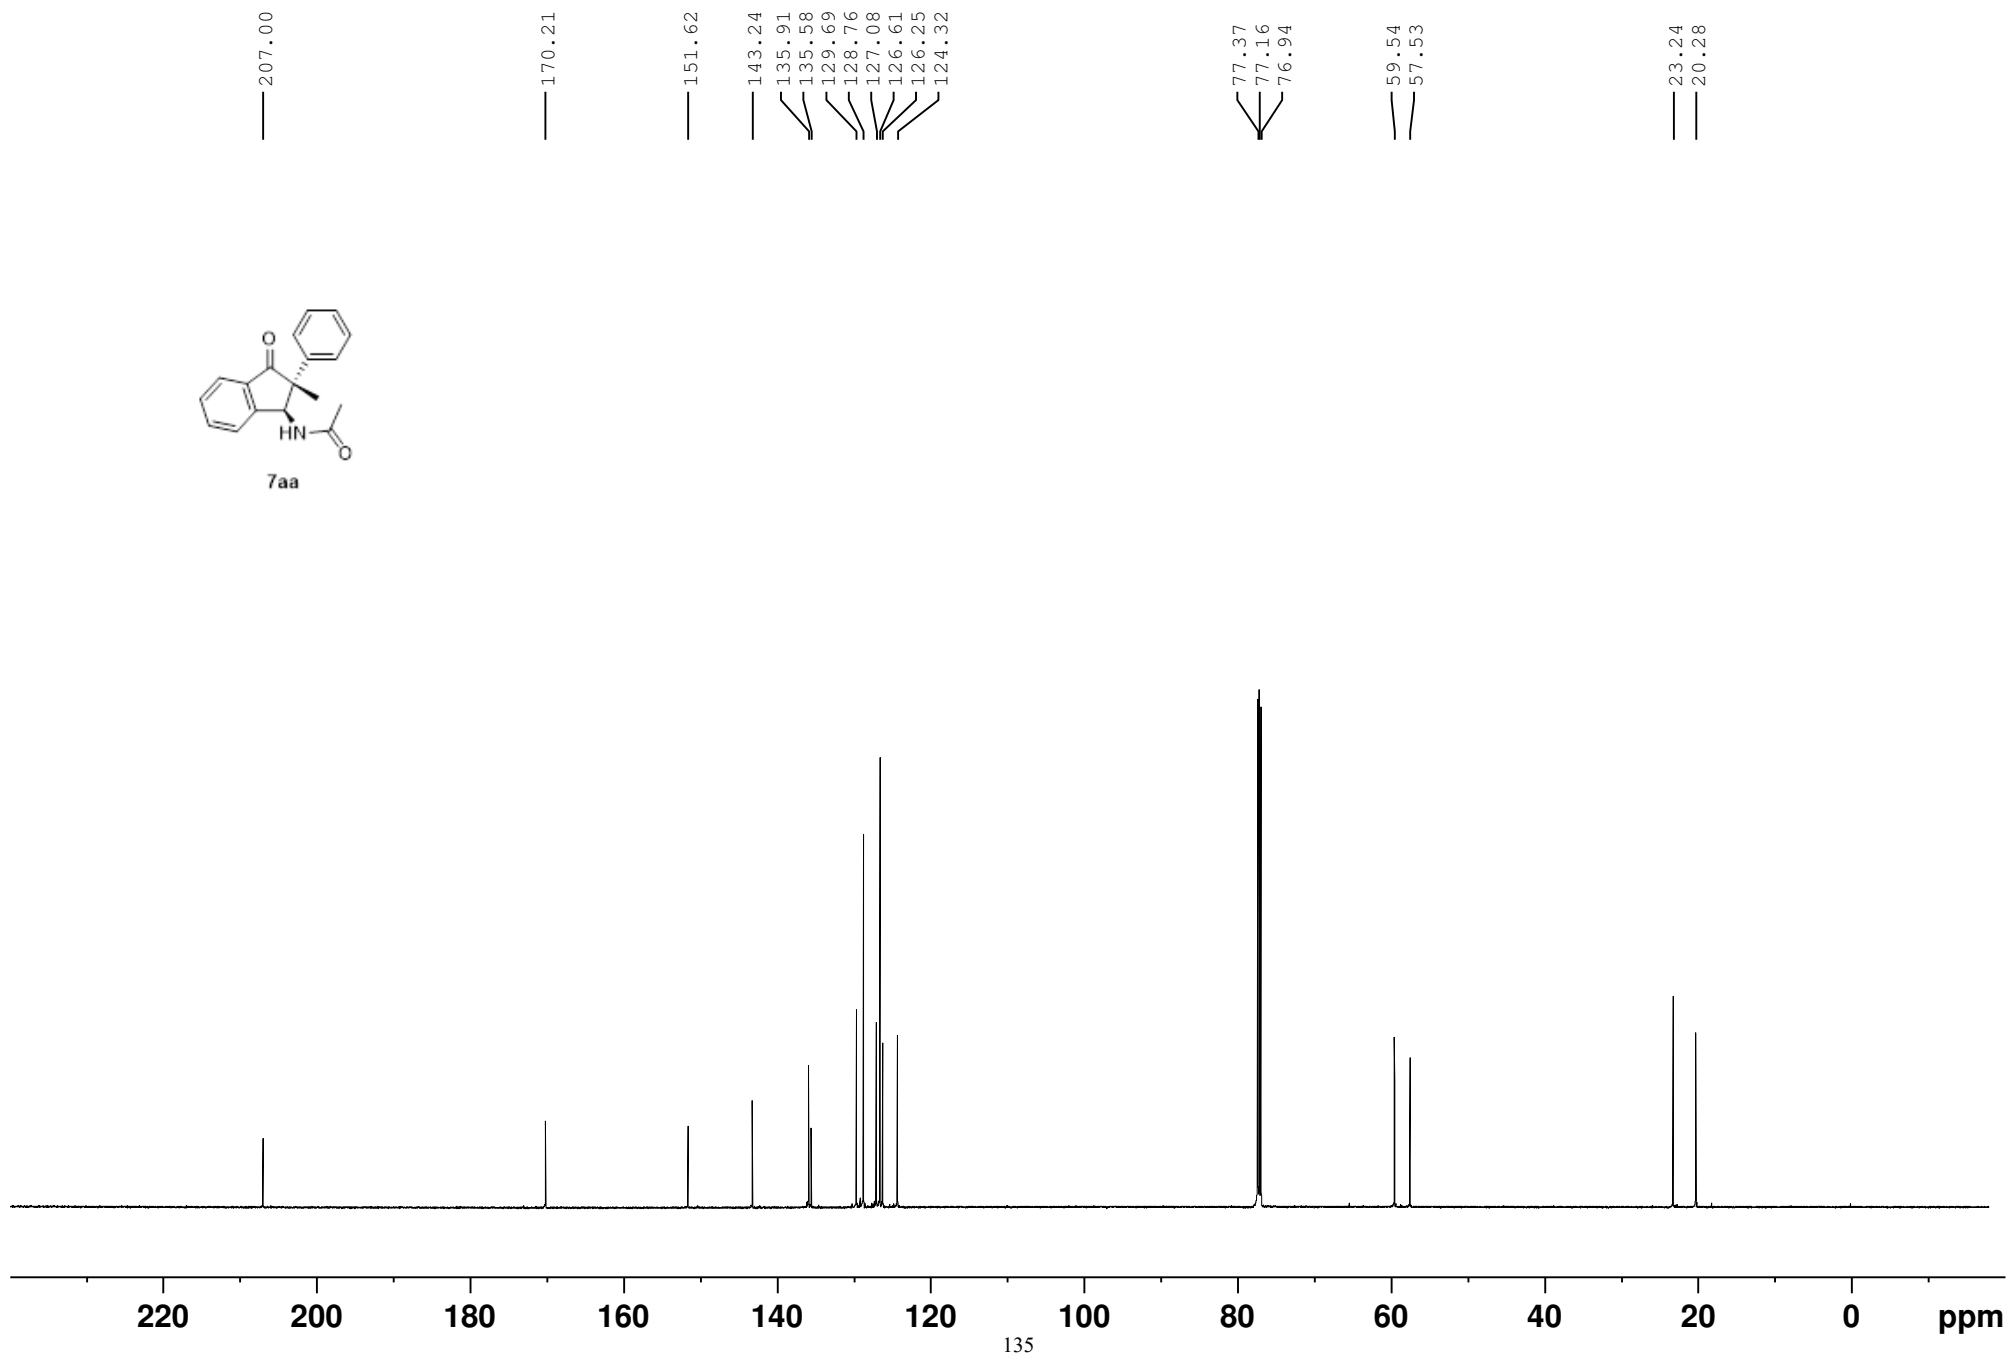

**<sup>1</sup>H NMR (400 MHz, CDCl<sub>3</sub>)**

7.804  
7.785  
7.684  
7.682  
7.665  
7.663  
7.647  
7.644  
7.534  
7.532  
7.514  
7.513  
7.503  
7.484  
7.465  
7.261  
7.256  
7.252  
7.240  
7.235  
7.110  
7.090  
5.991  
5.967  
5.930  
5.907

— 2.286  
— 2.051

— 1.447

— 0.073  
— -0.000

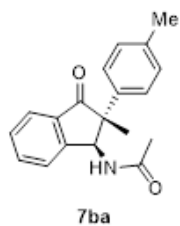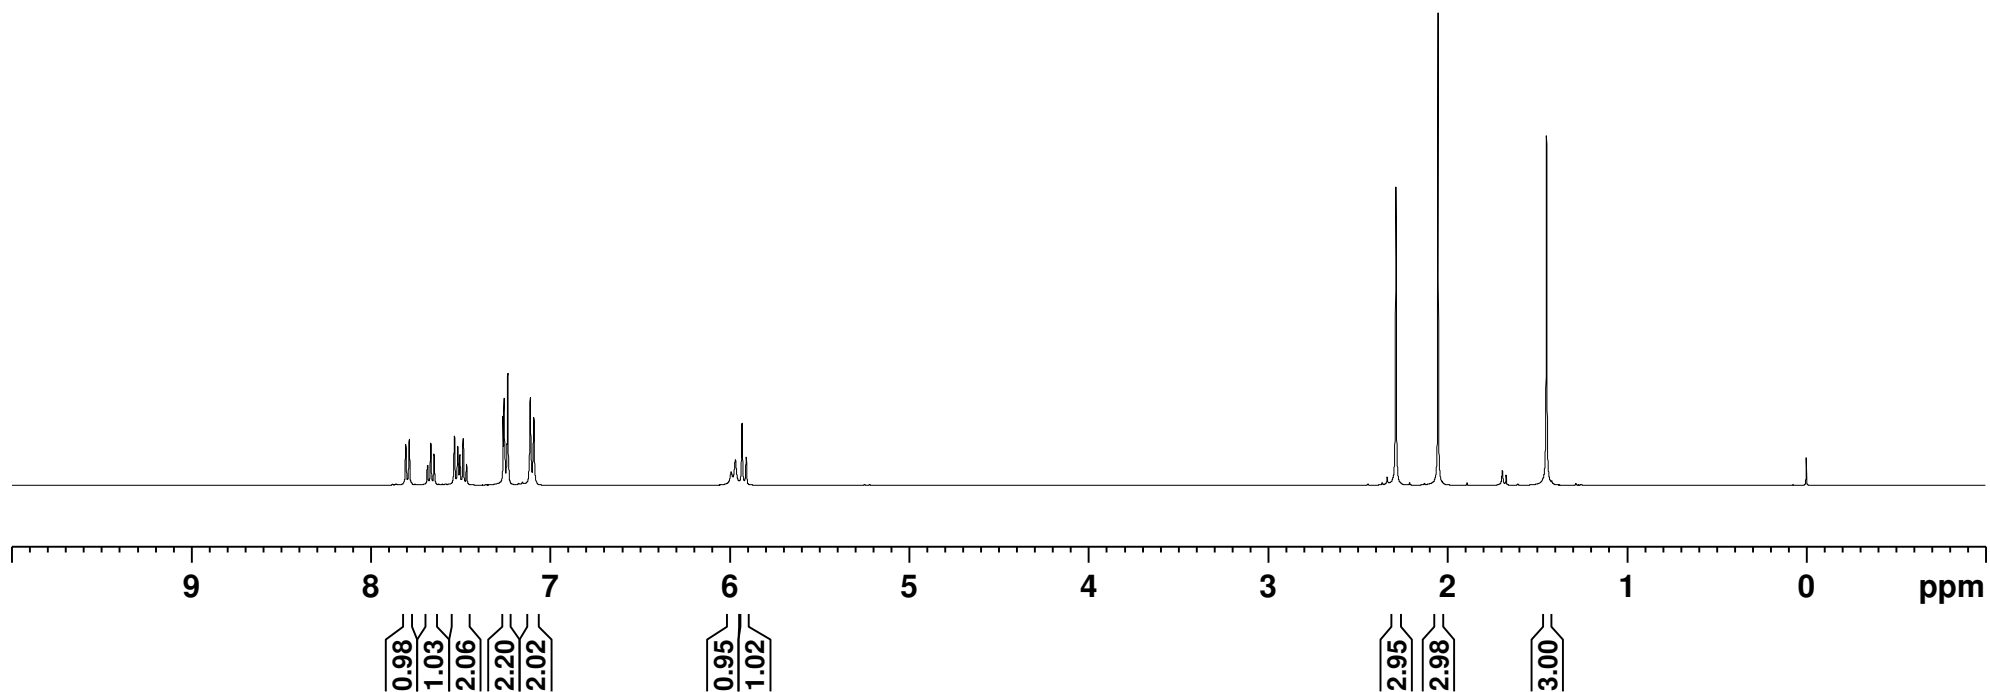

<sup>13</sup>C NMR (100 MHz, CDCl<sub>3</sub>)

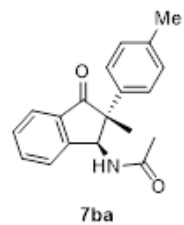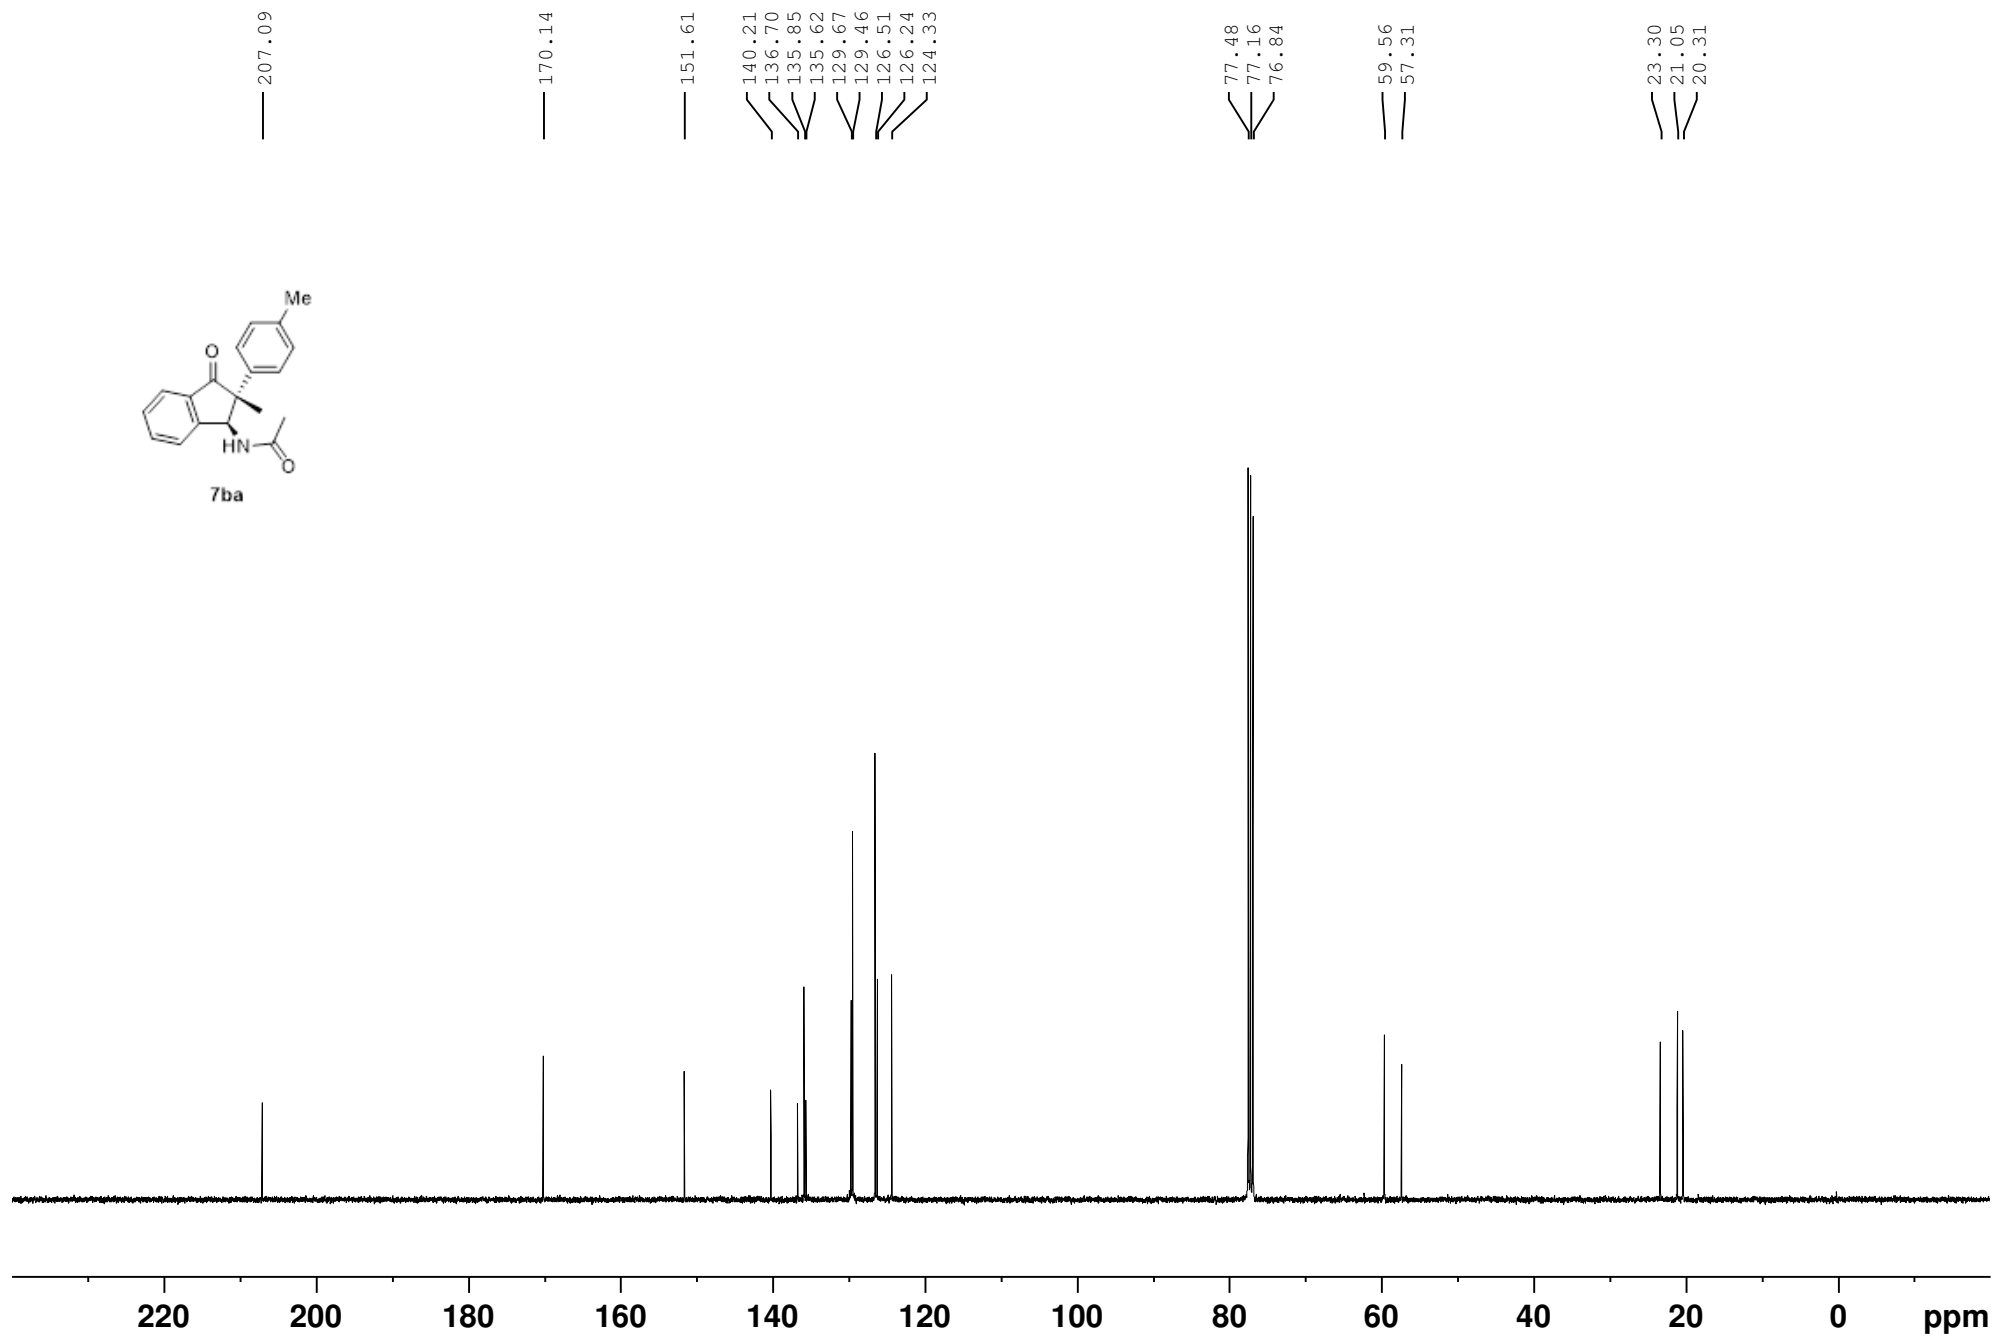

**<sup>1</sup>H NMR (400 MHz, CDCl<sub>3</sub>)**

7.737  
7.718  
7.644  
7.642  
7.625  
7.624  
7.607  
7.605  
7.491  
7.473  
7.472  
7.461  
7.442  
7.423  
7.263  
7.250  
7.229  
7.145  
7.124  
6.402  
6.378  
5.880  
5.856

2.896  
2.879  
2.861  
2.844  
2.827  
2.810  
2.792

1.956

1.413  
1.208  
1.190

0.081  
-0.000

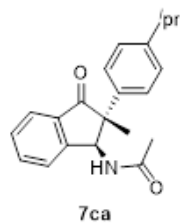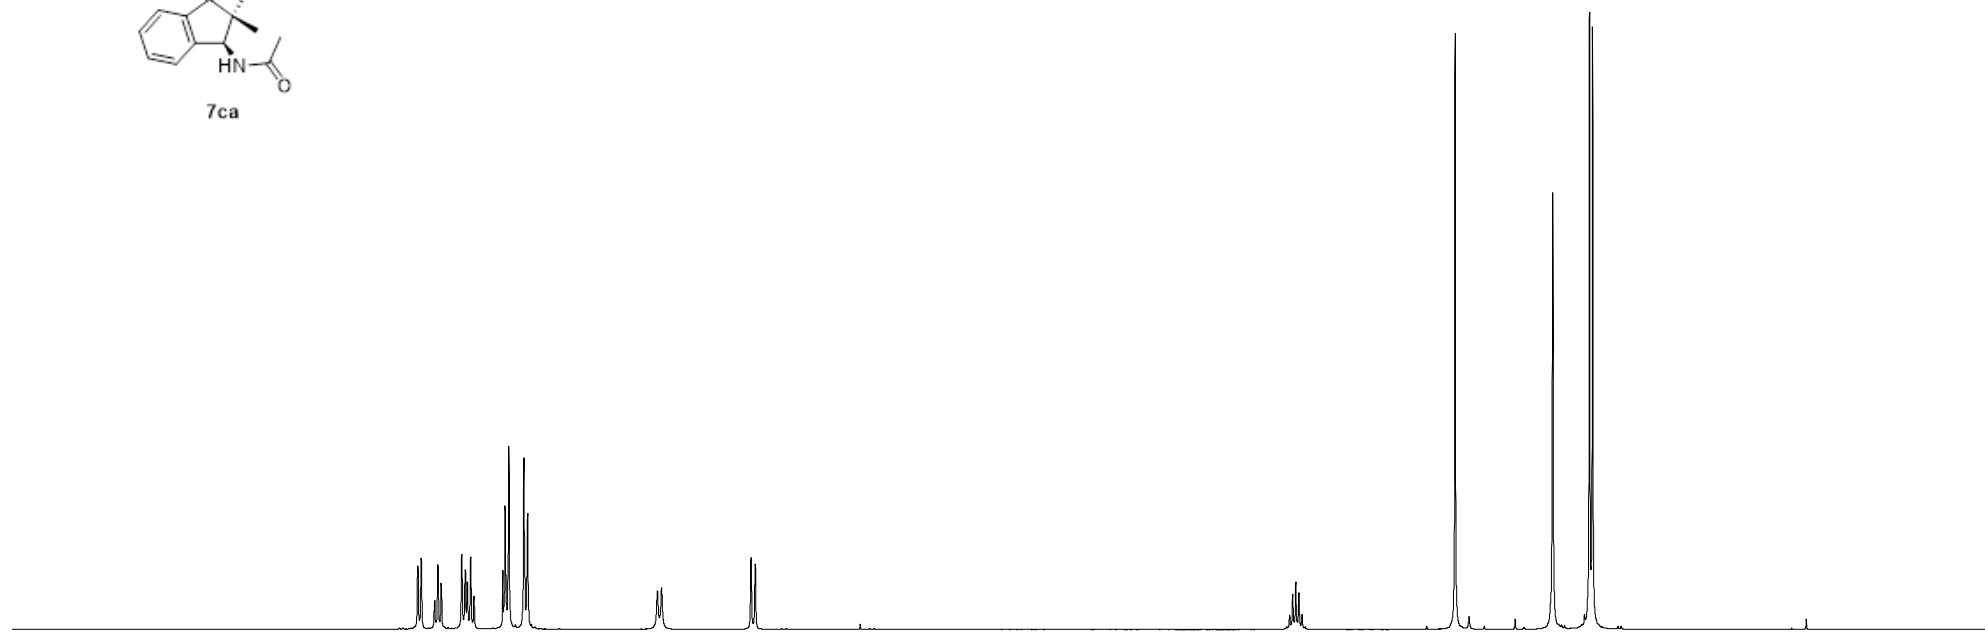

9

8

7

6

5

4

3

2

1

0

ppm

0.98  
1.01  
2.05  
1.98  
1.98

0.98  
0.98

1.03

2.96

3.00  
2.99  
2.92

**$^{13}\text{C}$  NMR (100 MHz,  $\text{CDCl}_3$ )**

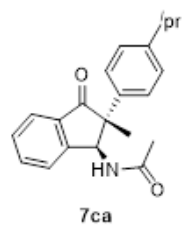

— 207.26

— 170.26

— 151.76

— 147.44

— 140.49

— 135.76

— 135.53

— 129.51

— 126.73

— 126.43

— 126.25

— 124.15

— 77.47

— 77.16

— 76.84

— 59.39

— 57.19

— 33.65

— 23.97

— 23.08

— 20.22

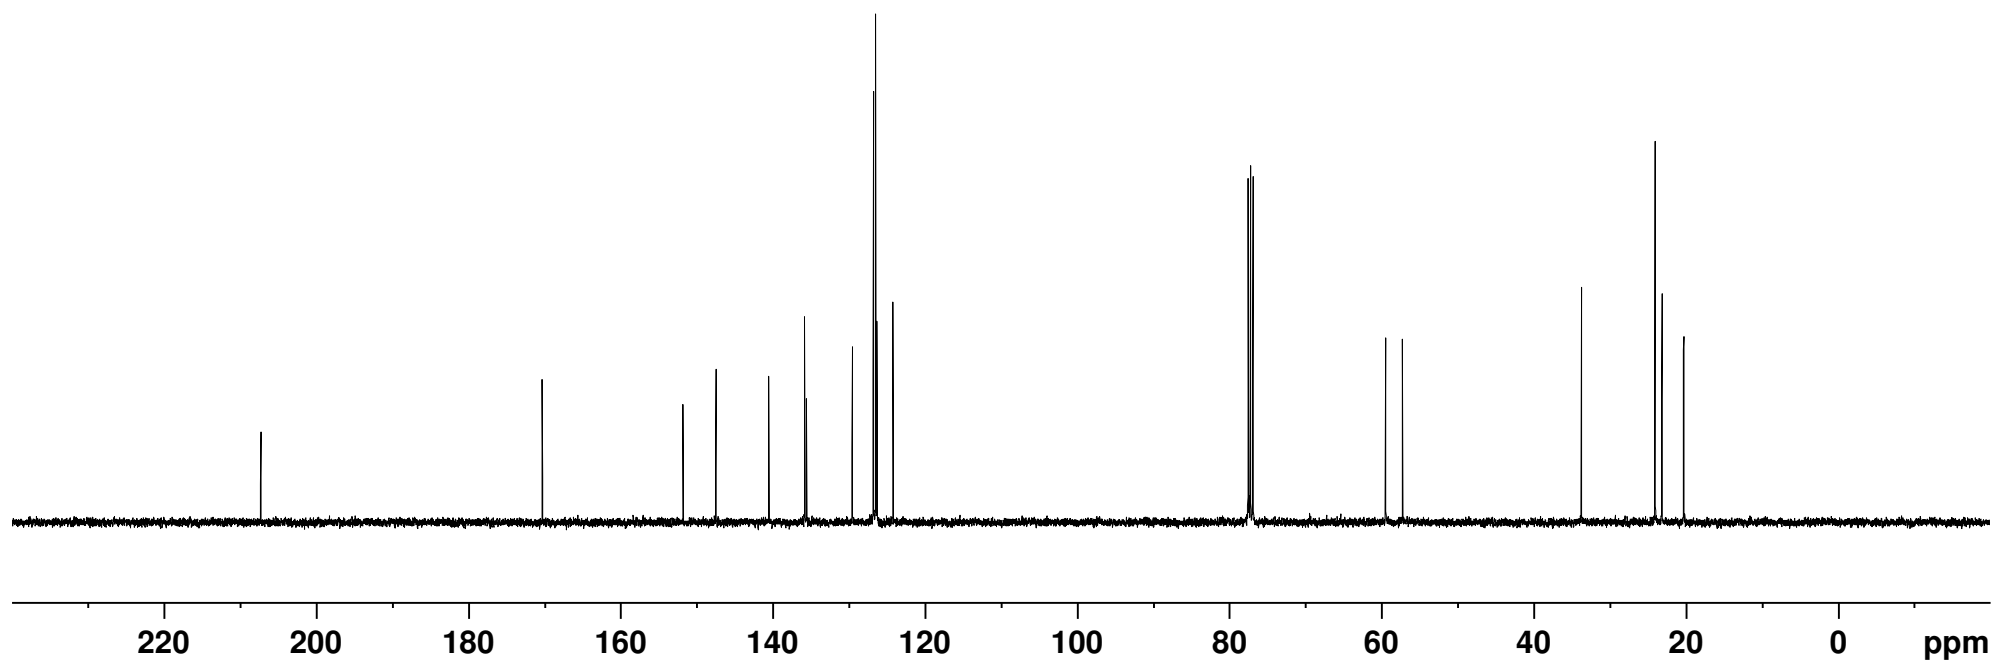

**$^1\text{H}$  NMR (400 MHz,  $\text{CDCl}_3$ )**

7.862  
7.842  
7.738  
7.736  
7.719  
7.701  
7.698  
7.567  
7.554  
7.550  
7.536  
7.518  
7.448  
7.441  
7.436  
7.424  
7.420  
7.413  
7.312  
7.305  
7.301  
7.288  
7.284  
7.277  
7.263  
5.929  
5.906  
5.762  
5.739

— 2.126

— 1.465

— -0.000

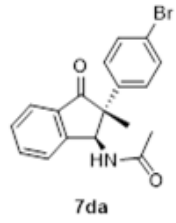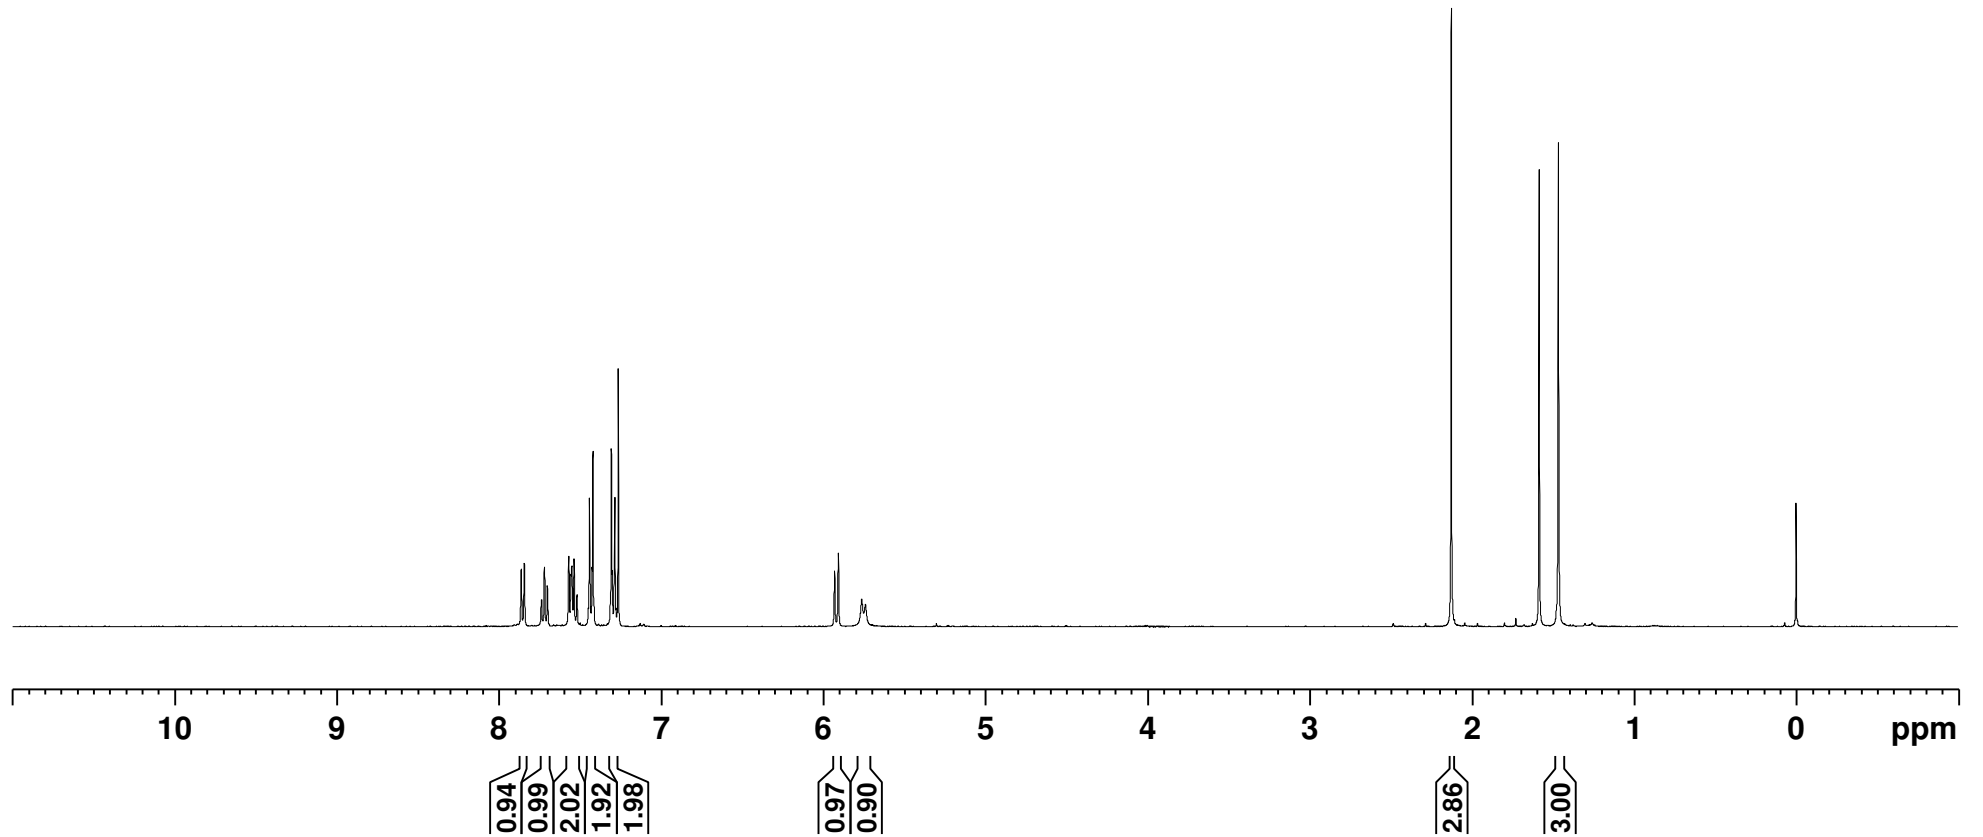

<sup>13</sup>C NMR (100 MHz, (CD<sub>3</sub>)<sub>2</sub>SO)

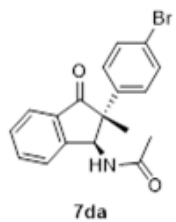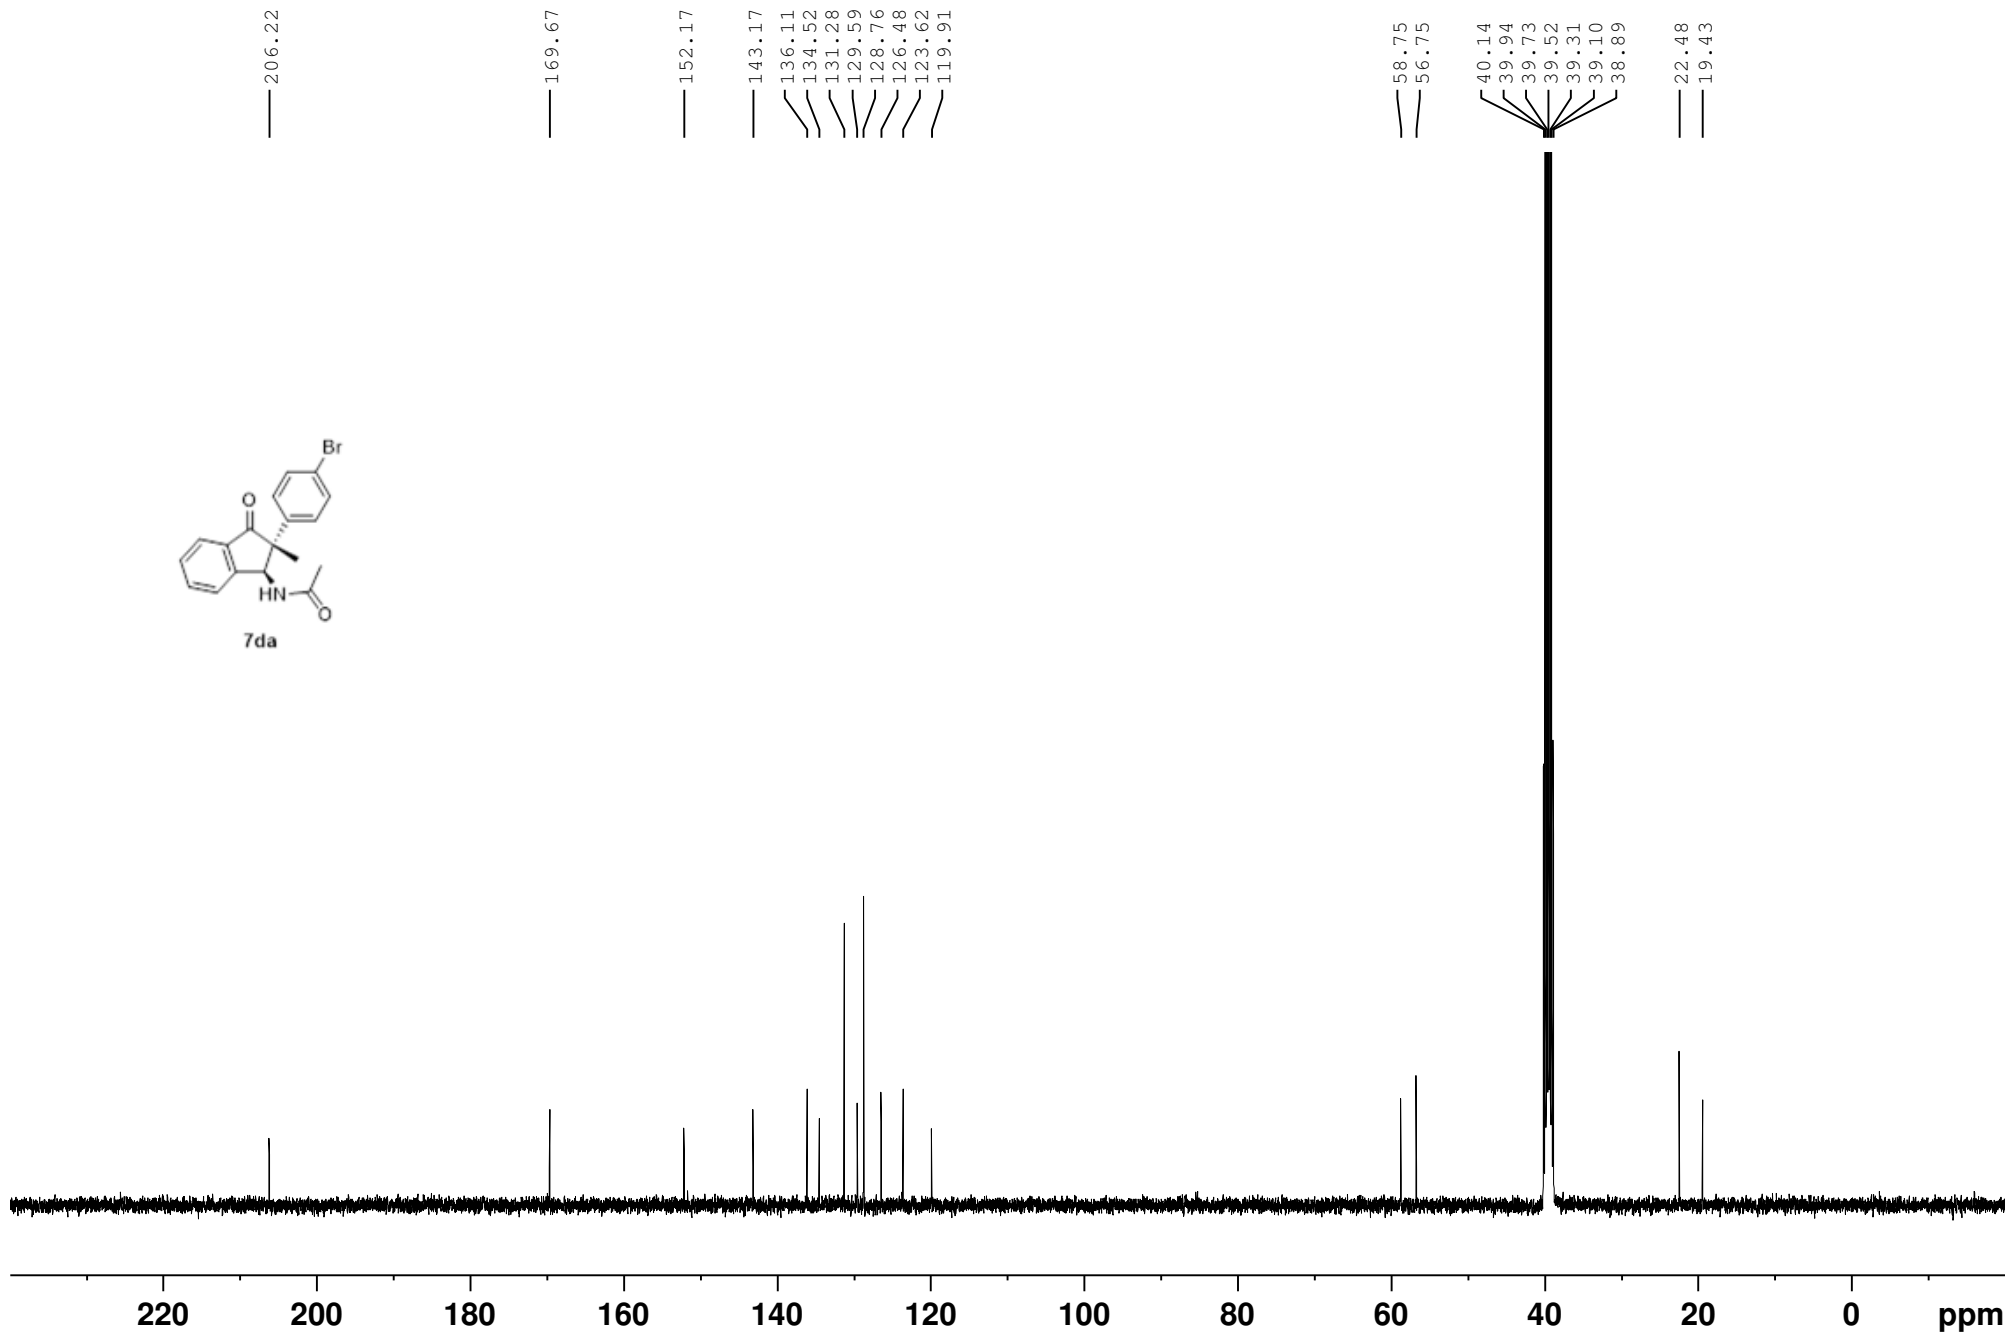

<sup>1</sup>H NMR (400 MHz, CDCl<sub>3</sub>)

7.906  
7.905  
7.885  
7.752  
7.749  
7.733  
7.715  
7.712  
7.580  
7.570  
7.561  
7.551  
7.550  
7.544  
7.543  
7.421  
7.414  
7.410  
7.398  
7.393  
7.386  
7.267  
6.969  
6.962  
6.957  
6.945  
6.940  
6.933  
5.672  
5.648  
5.194  
5.171

1.784  
1.745

-0.000

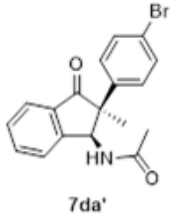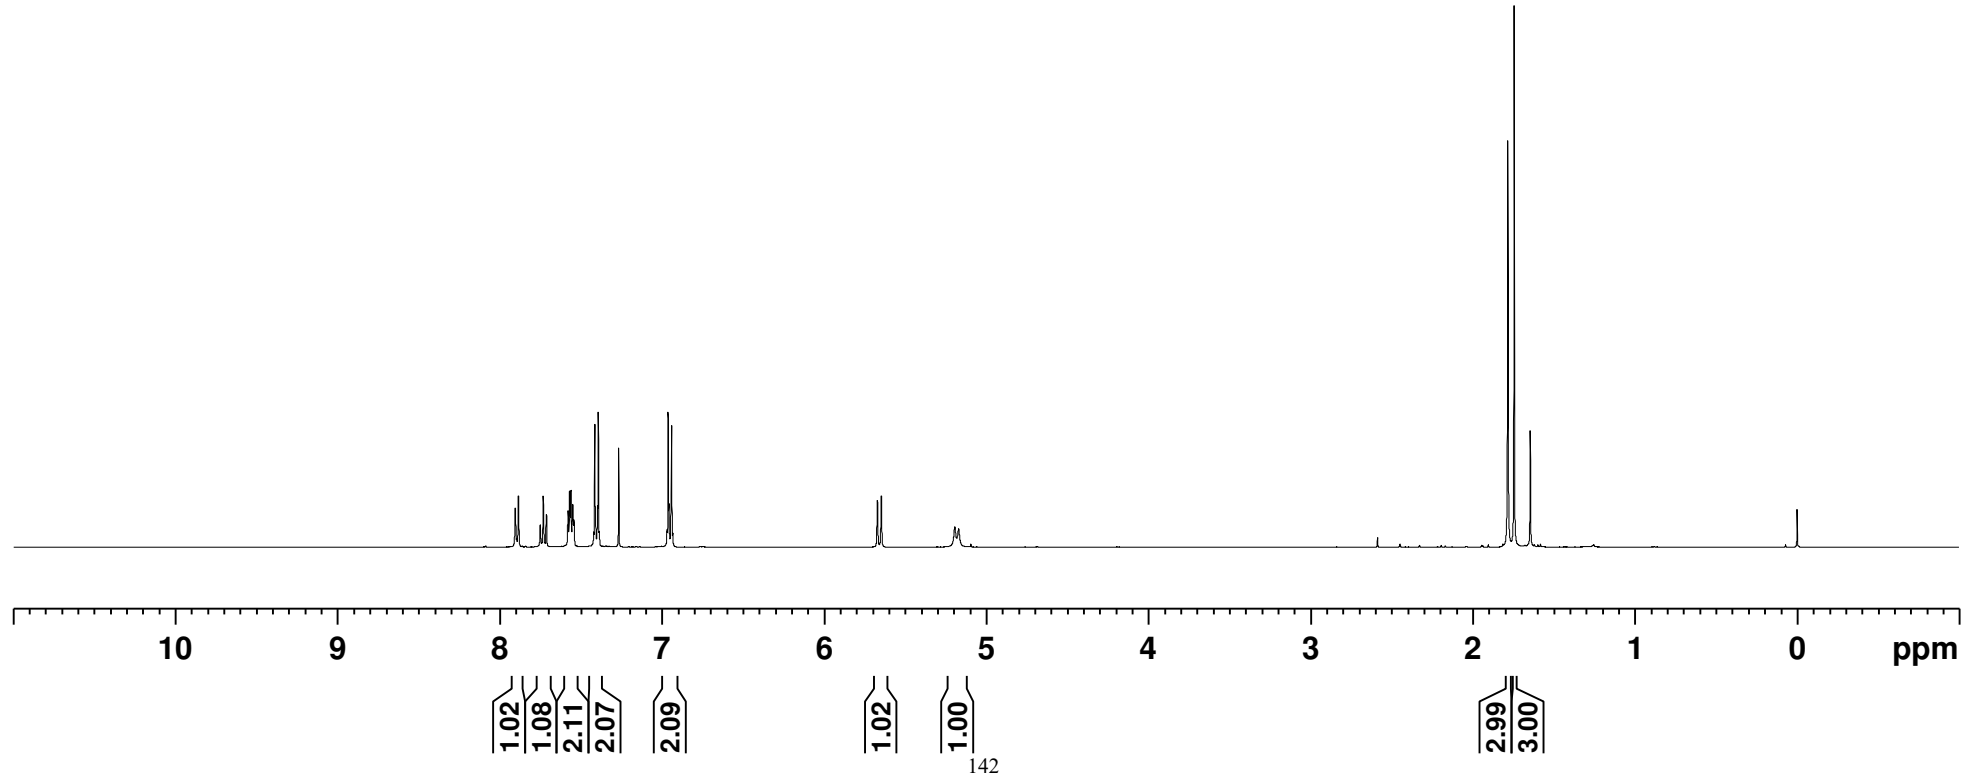



<sup>13</sup>C NMR (100 MHz, CDCl<sub>3</sub>)

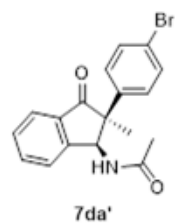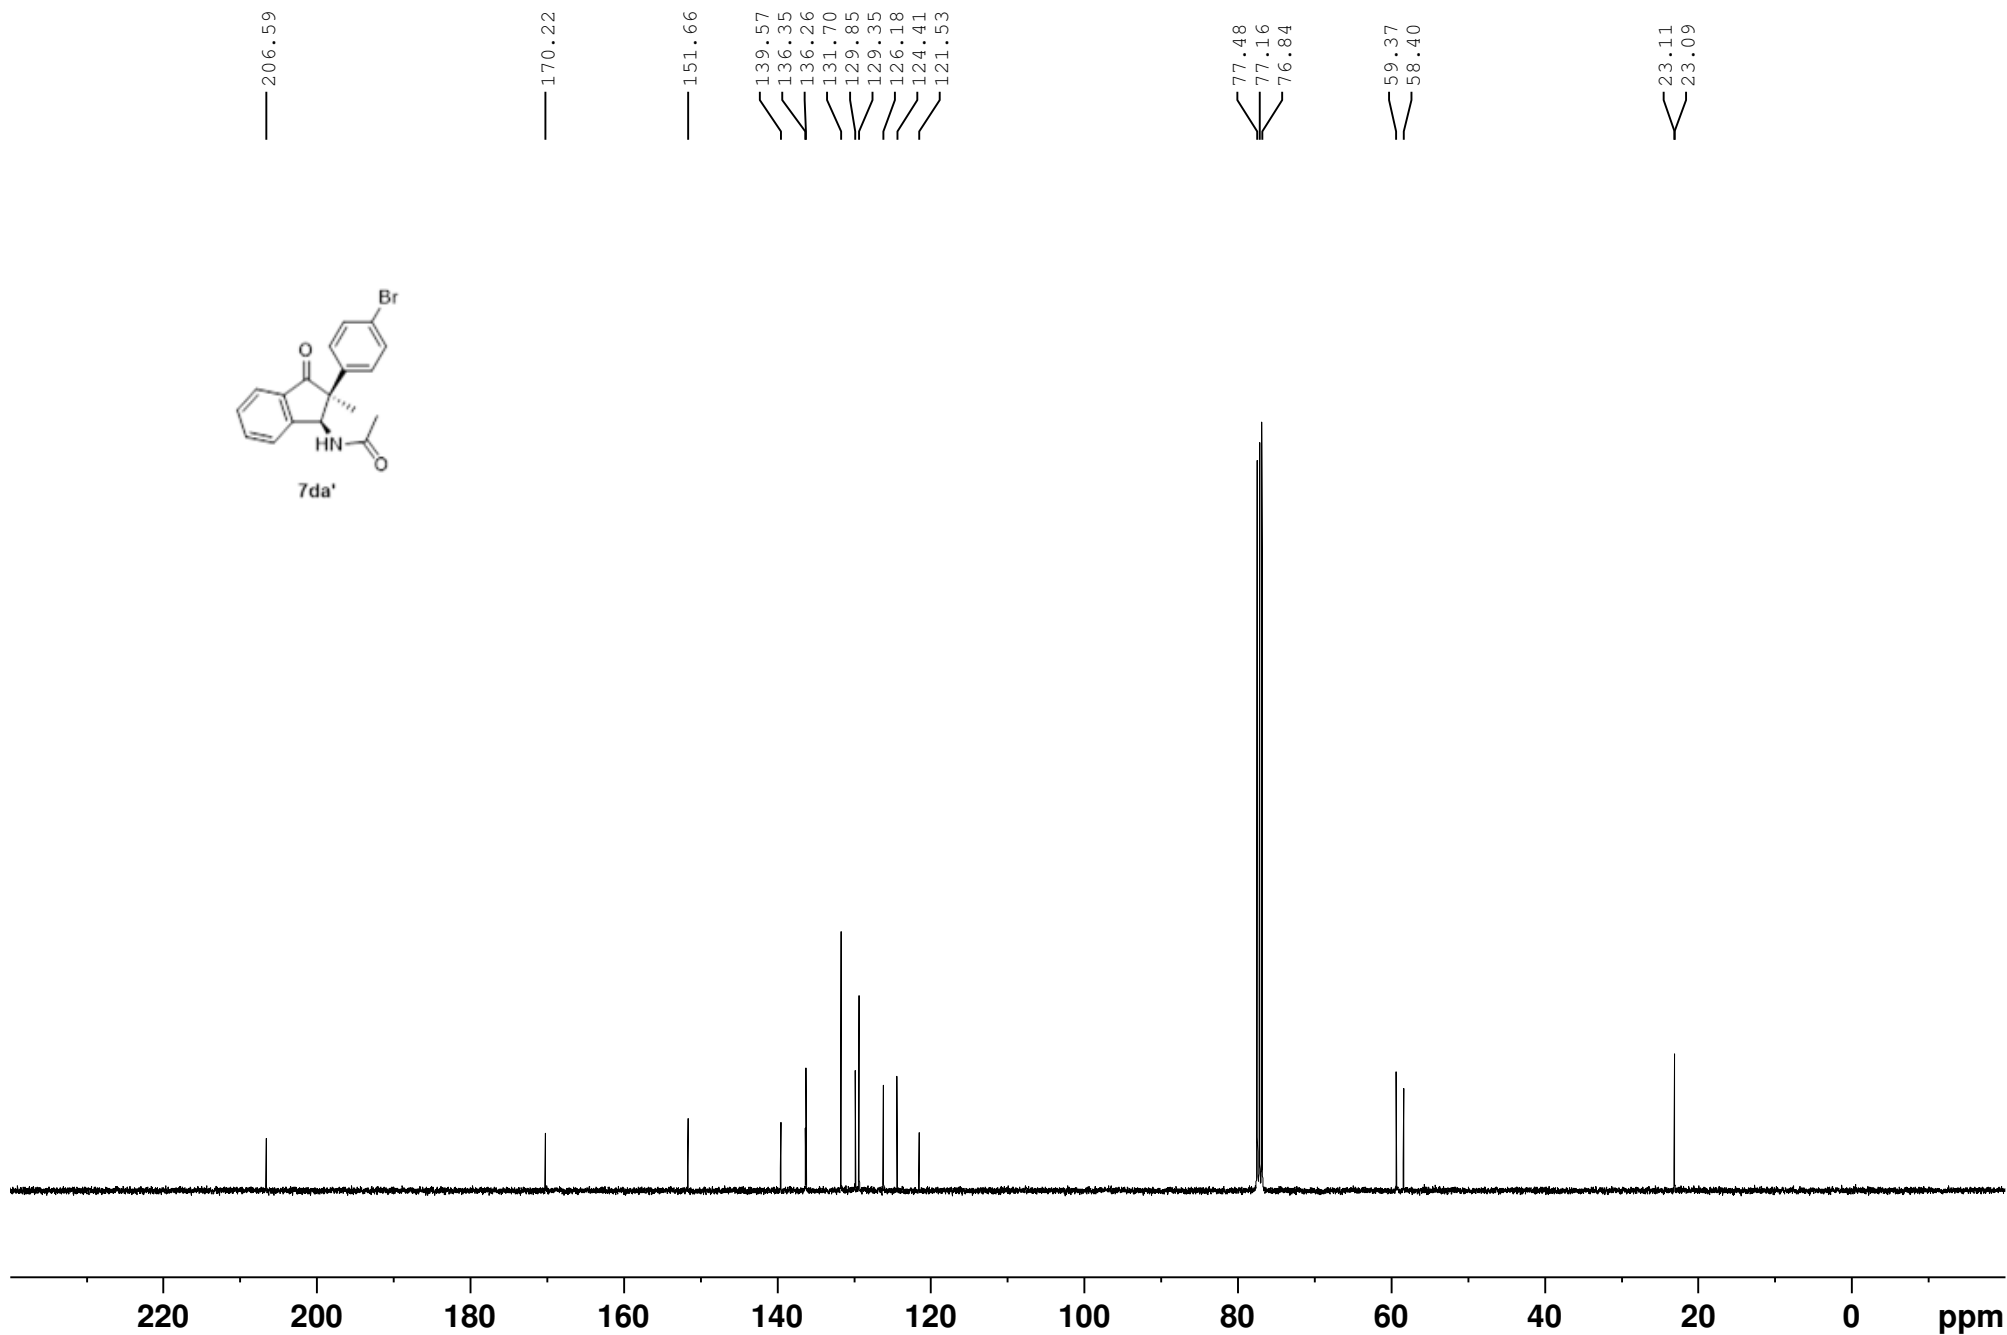

**<sup>1</sup>H NMR (400 MHz, CDCl<sub>3</sub>)**

7.863  
7.844  
7.738  
7.736  
7.718  
7.701  
7.698  
7.569  
7.551  
7.536  
7.518  
7.373  
7.367  
7.362  
7.350  
7.345  
7.338  
7.293  
7.287  
7.282  
7.270  
7.262  
5.934  
5.911  
5.750  
5.726

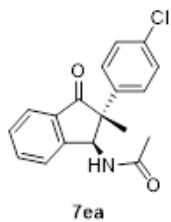

— 2.127

— 1.470

< 0.070  
< -0.000

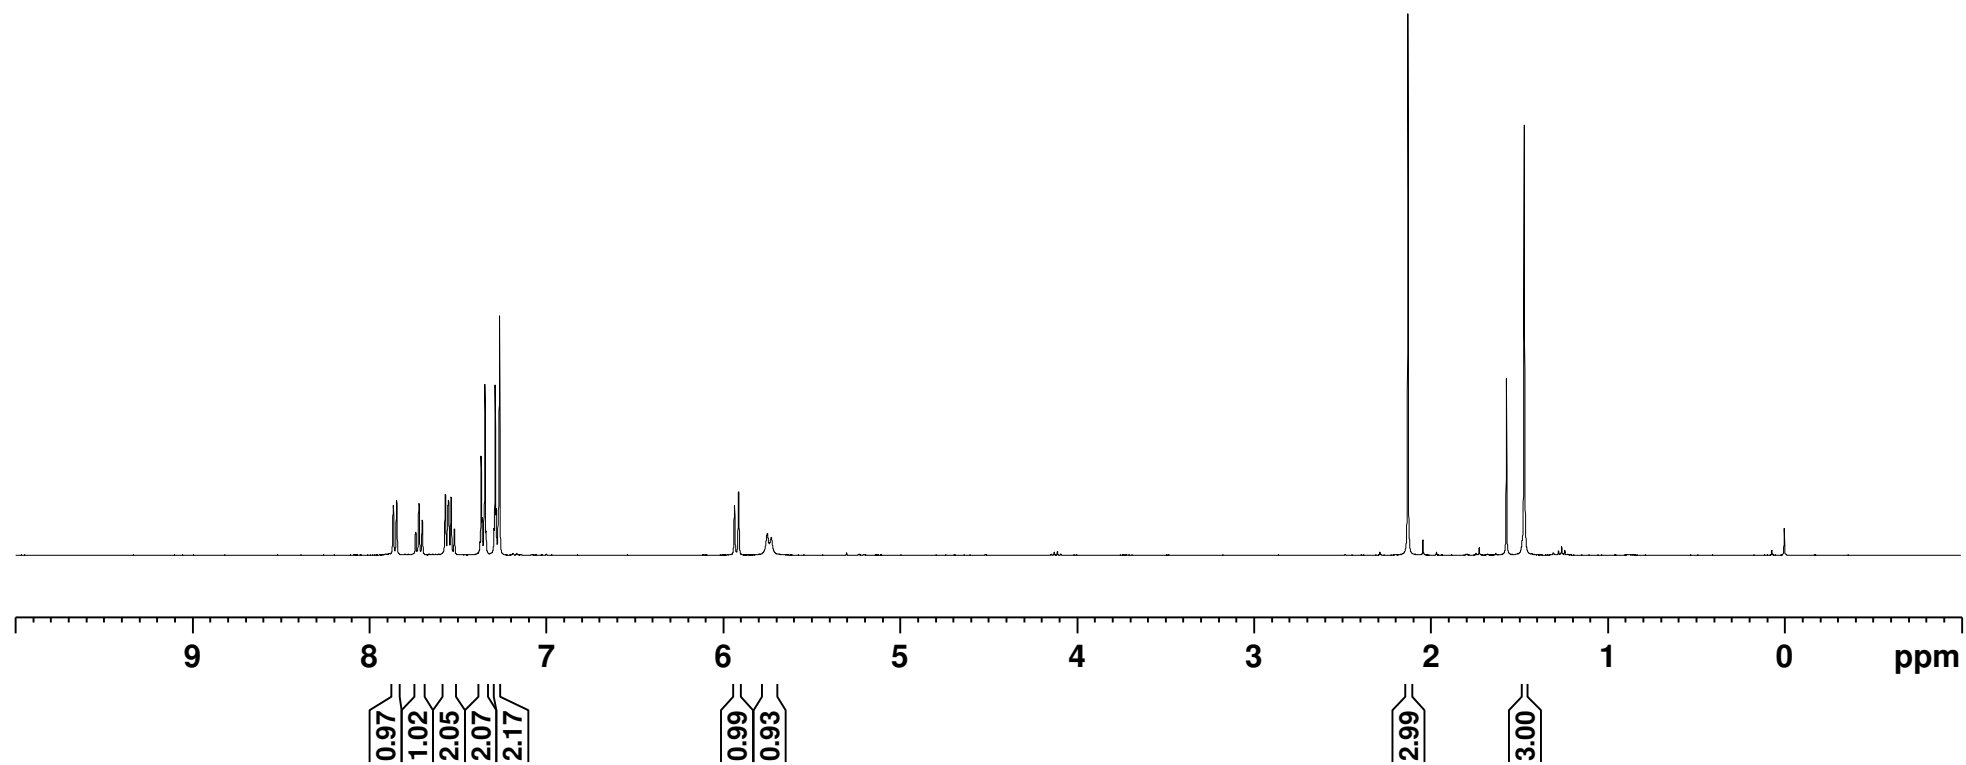

**<sup>13</sup>C NMR (100 MHz, CDCl<sub>3</sub>)**

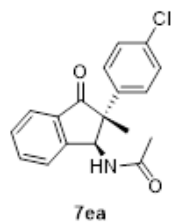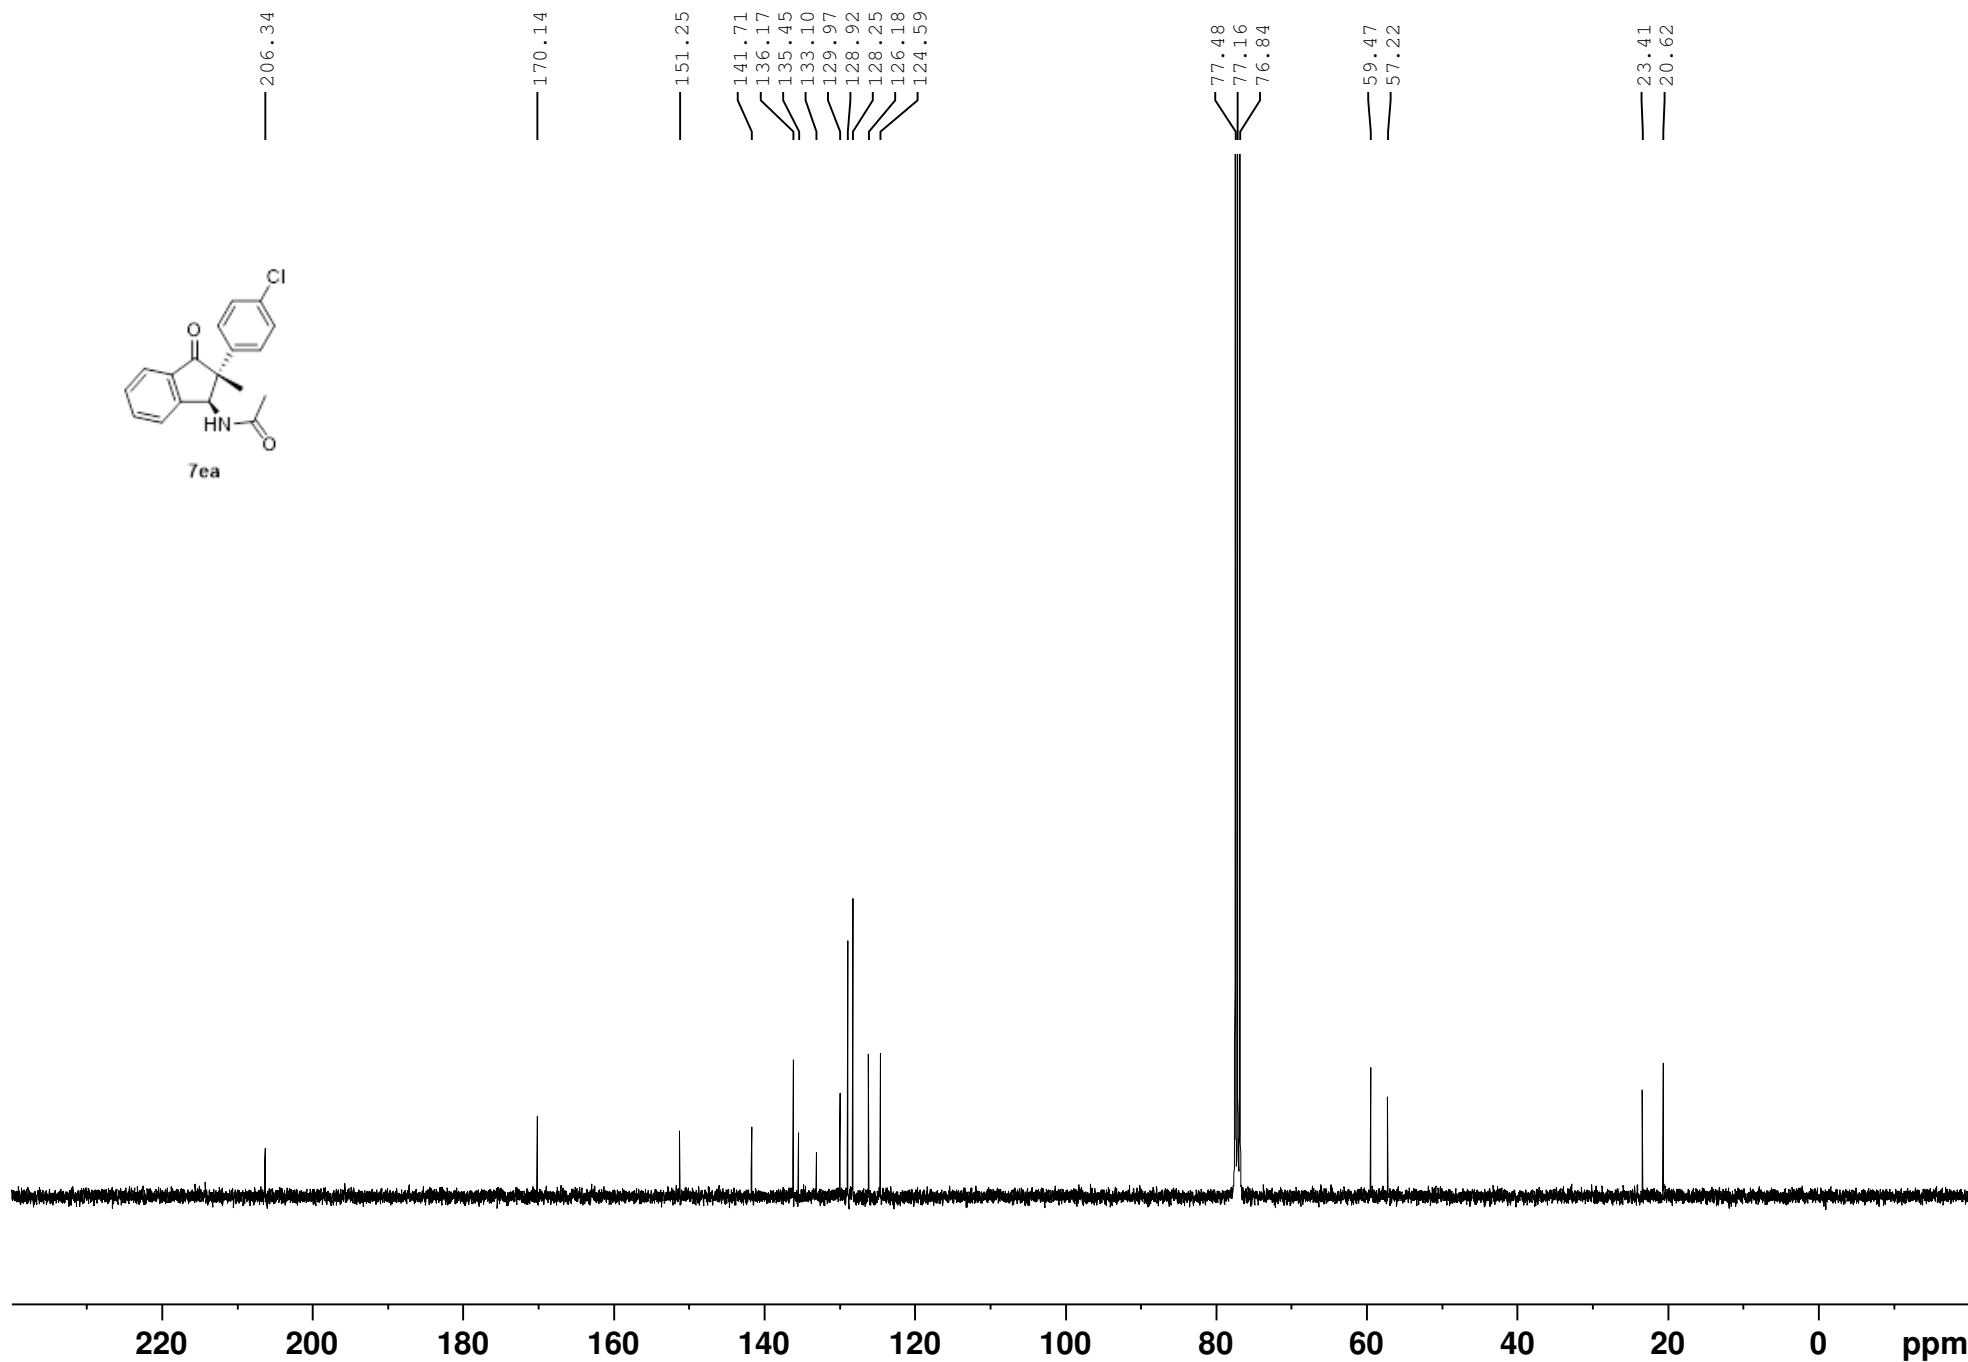

**<sup>1</sup>H NMR (400 MHz, CDCl<sub>3</sub>)**

7.907  
7.906  
7.887  
7.752  
7.750  
7.734  
7.732  
7.715  
7.712  
7.580  
7.579  
7.572  
7.561  
7.553  
7.551  
7.543  
7.267  
7.264  
7.259  
7.247  
7.242  
7.235  
7.029  
7.023  
7.018  
7.006  
7.001  
6.994  
5.671  
5.647  
5.186  
5.162

1.788  
1.740

— 0.000

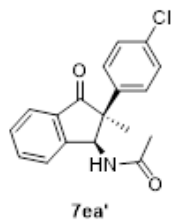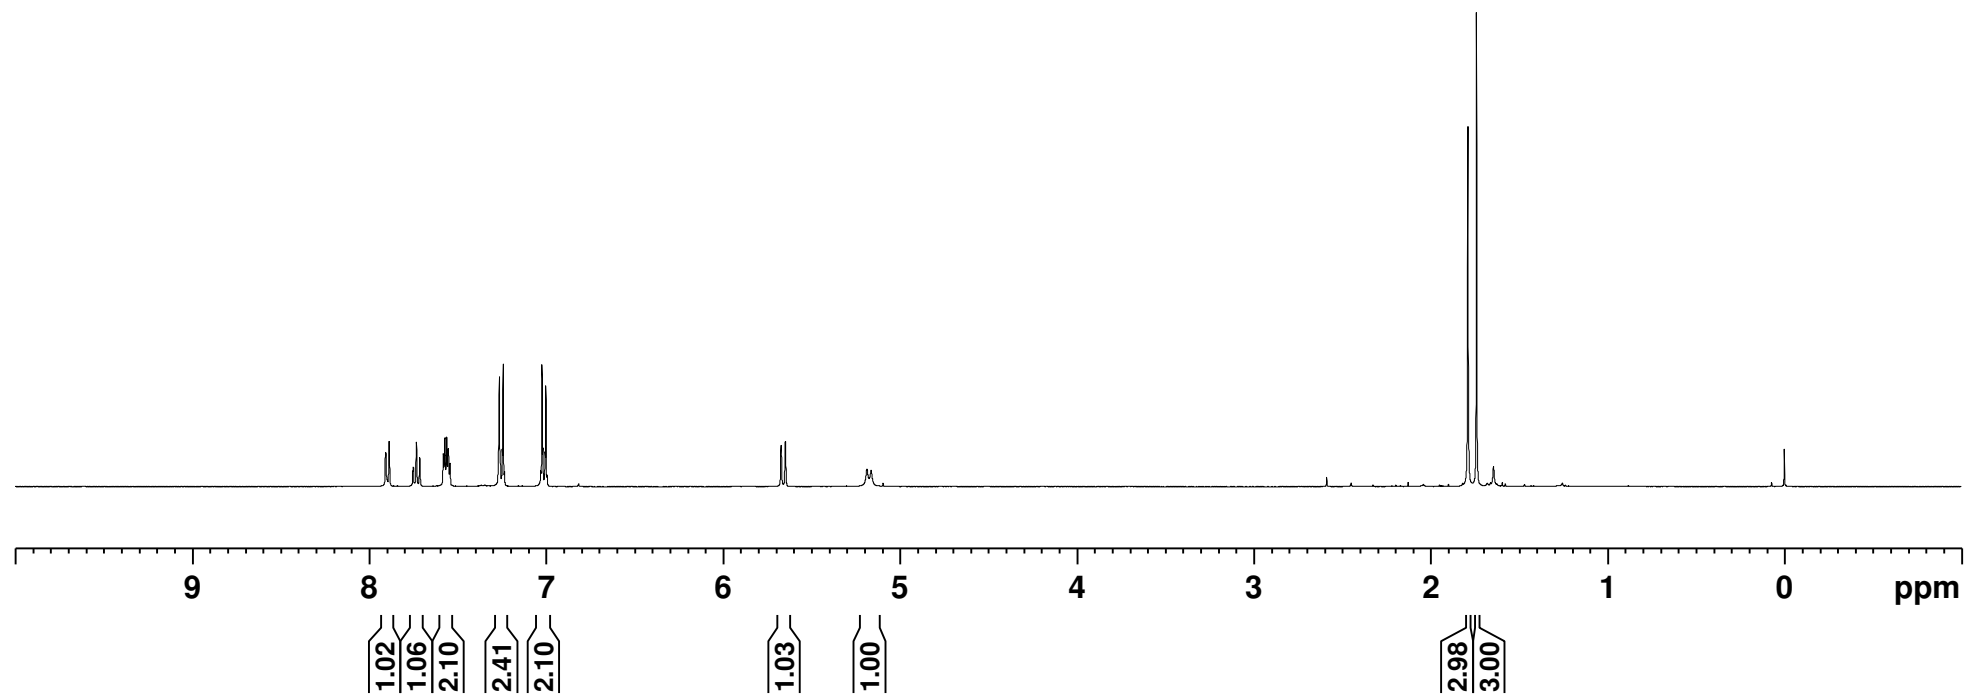

<sup>13</sup>C NMR (100 MHz, CDCl<sub>3</sub>)

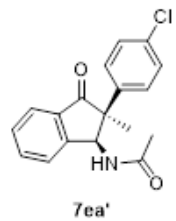

206.67

170.21

151.67

139.03  
136.34  
136.25  
133.39  
129.83  
129.00  
128.74  
126.20  
124.40

77.48  
77.16  
76.84

59.41  
58.32

23.15  
23.09

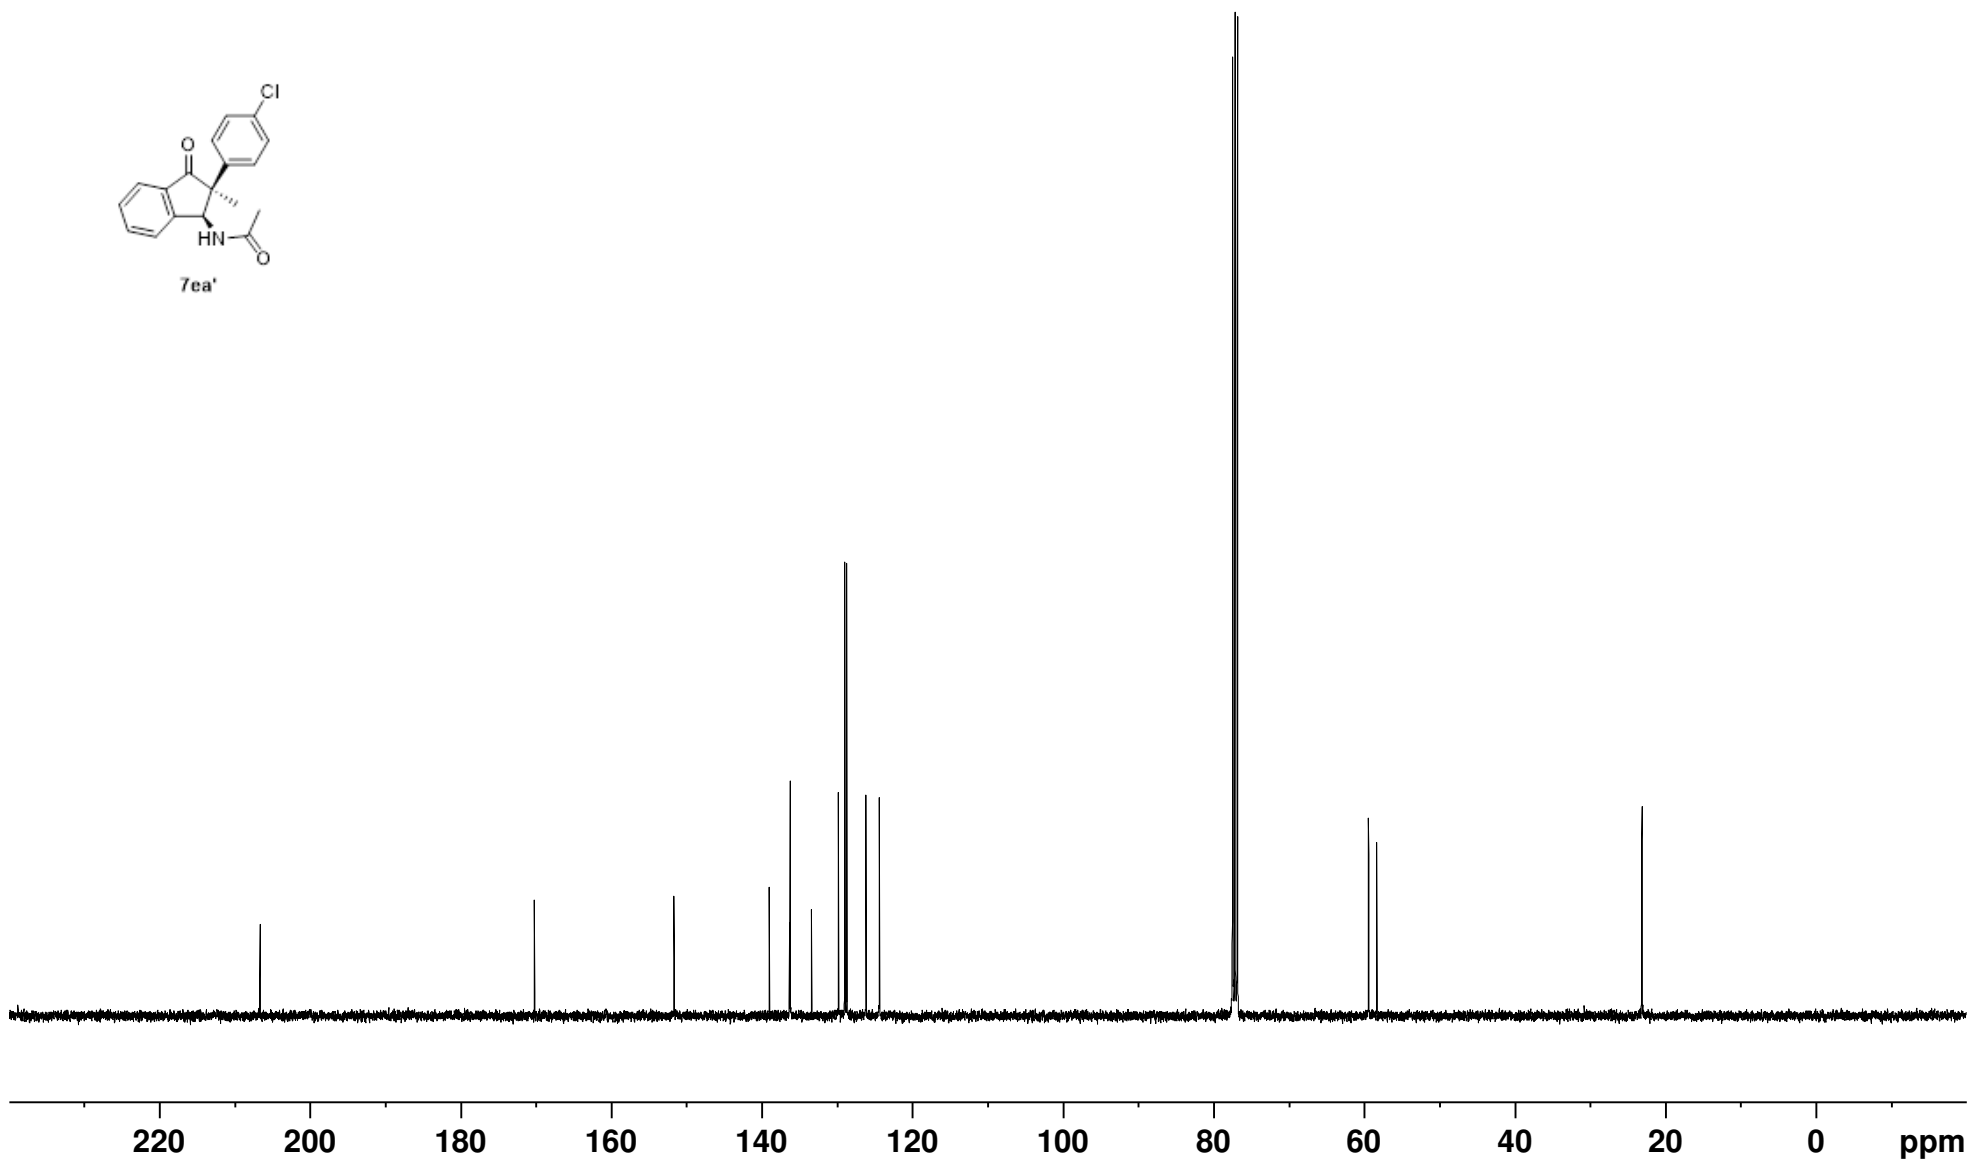

<sup>1</sup>H NMR (400 MHz, CDCl<sub>3</sub>)

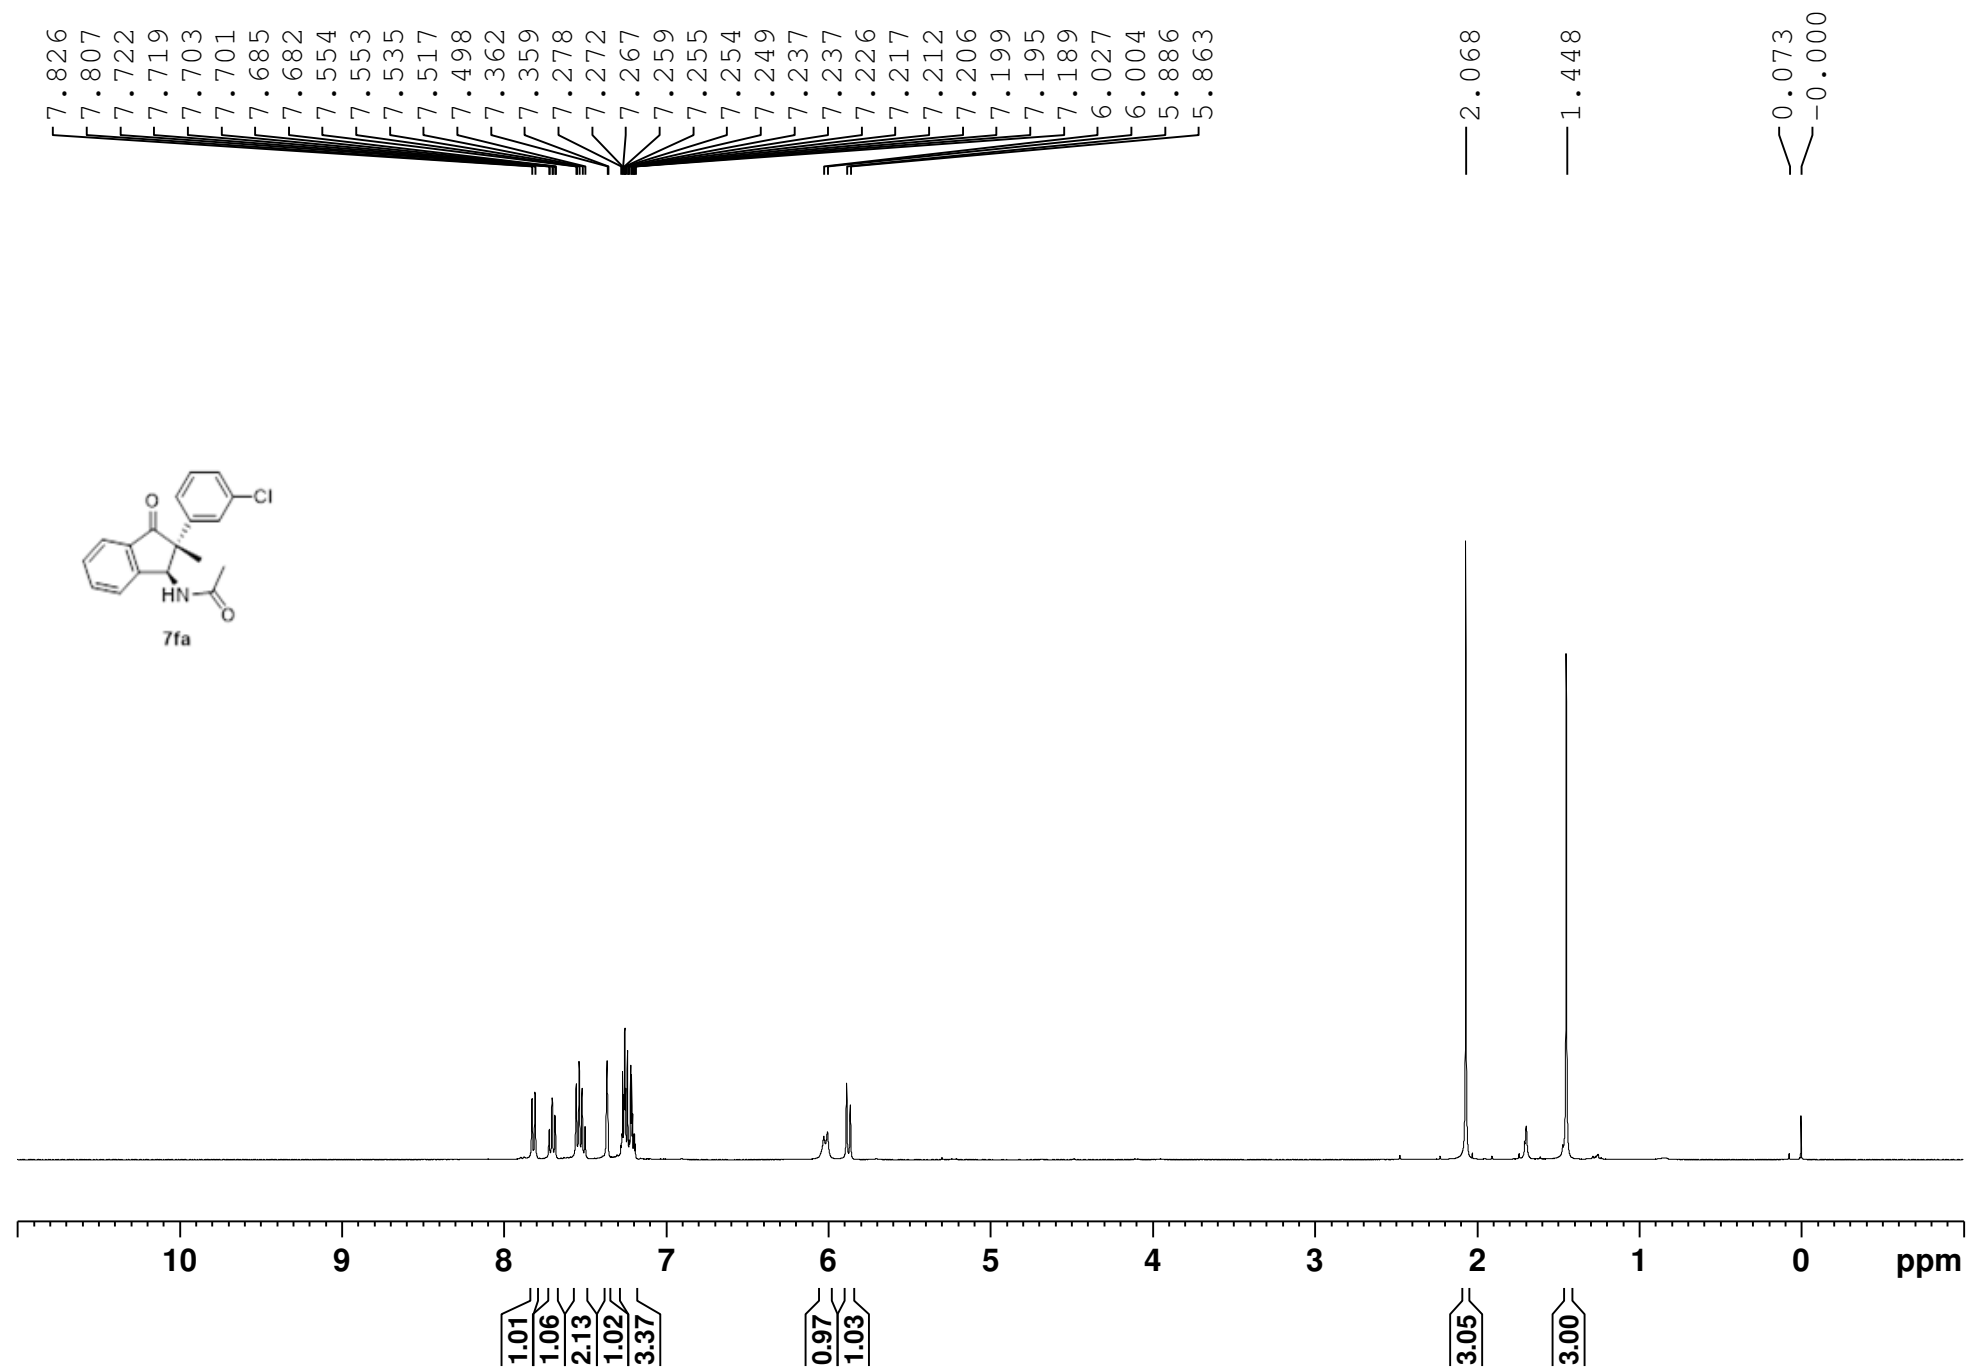

<sup>13</sup>C NMR (100 MHz, CDCl<sub>3</sub>)

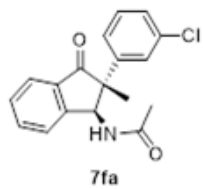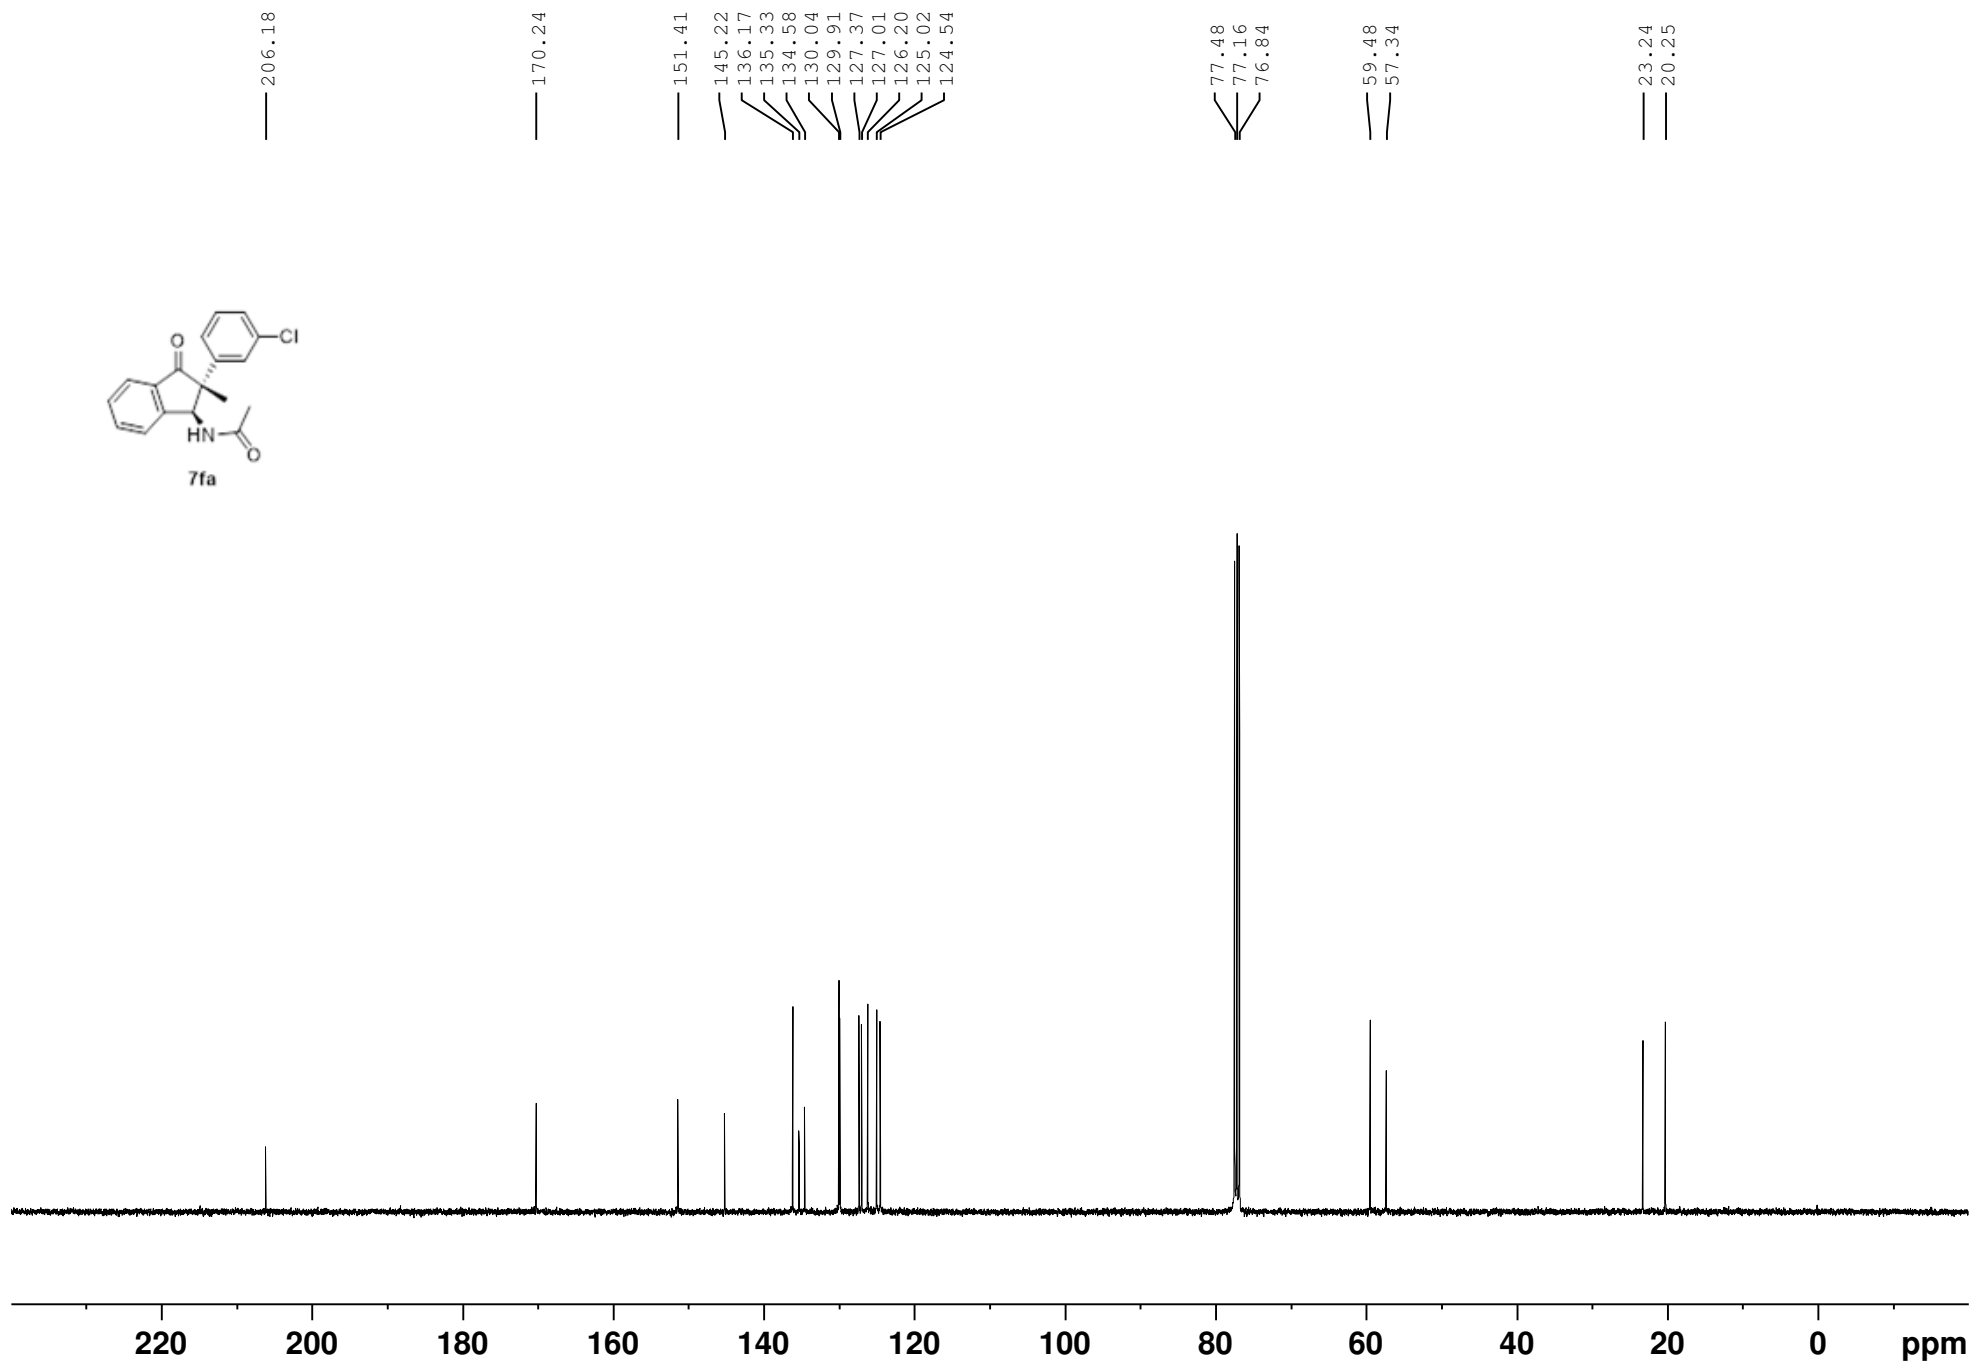

**<sup>1</sup>H NMR (600 MHz, CDCl<sub>3</sub>)**

7.911  
7.898  
7.747  
7.745  
7.734  
7.722  
7.720  
7.577  
7.569  
7.565  
7.556  
7.266  
7.244  
7.241  
7.234  
7.231  
7.228  
7.217  
7.203  
7.059  
7.056  
6.973  
6.970  
6.967  
6.961  
6.959  
6.956  
5.677  
5.660  
5.210  
5.194

1.795  
1.736

0.072  
-0.000

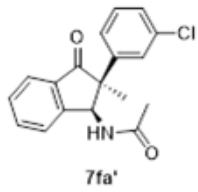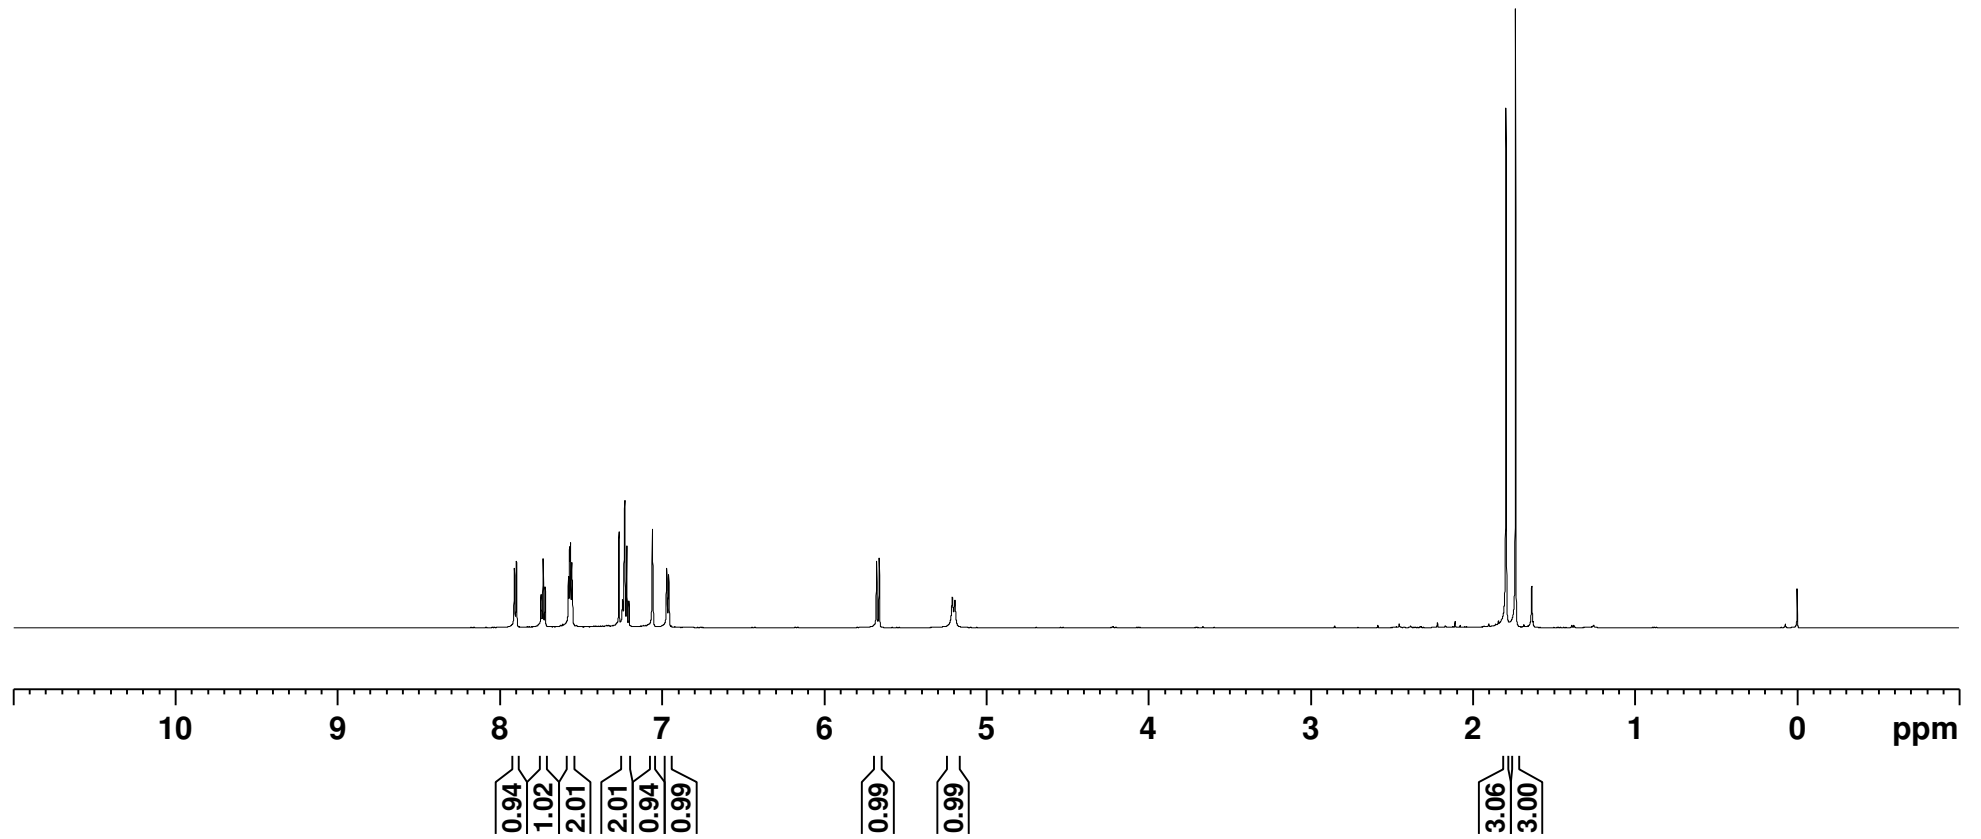



<sup>13</sup>C NMR (150 MHz, CDCl<sub>3</sub>)

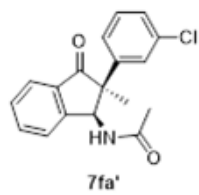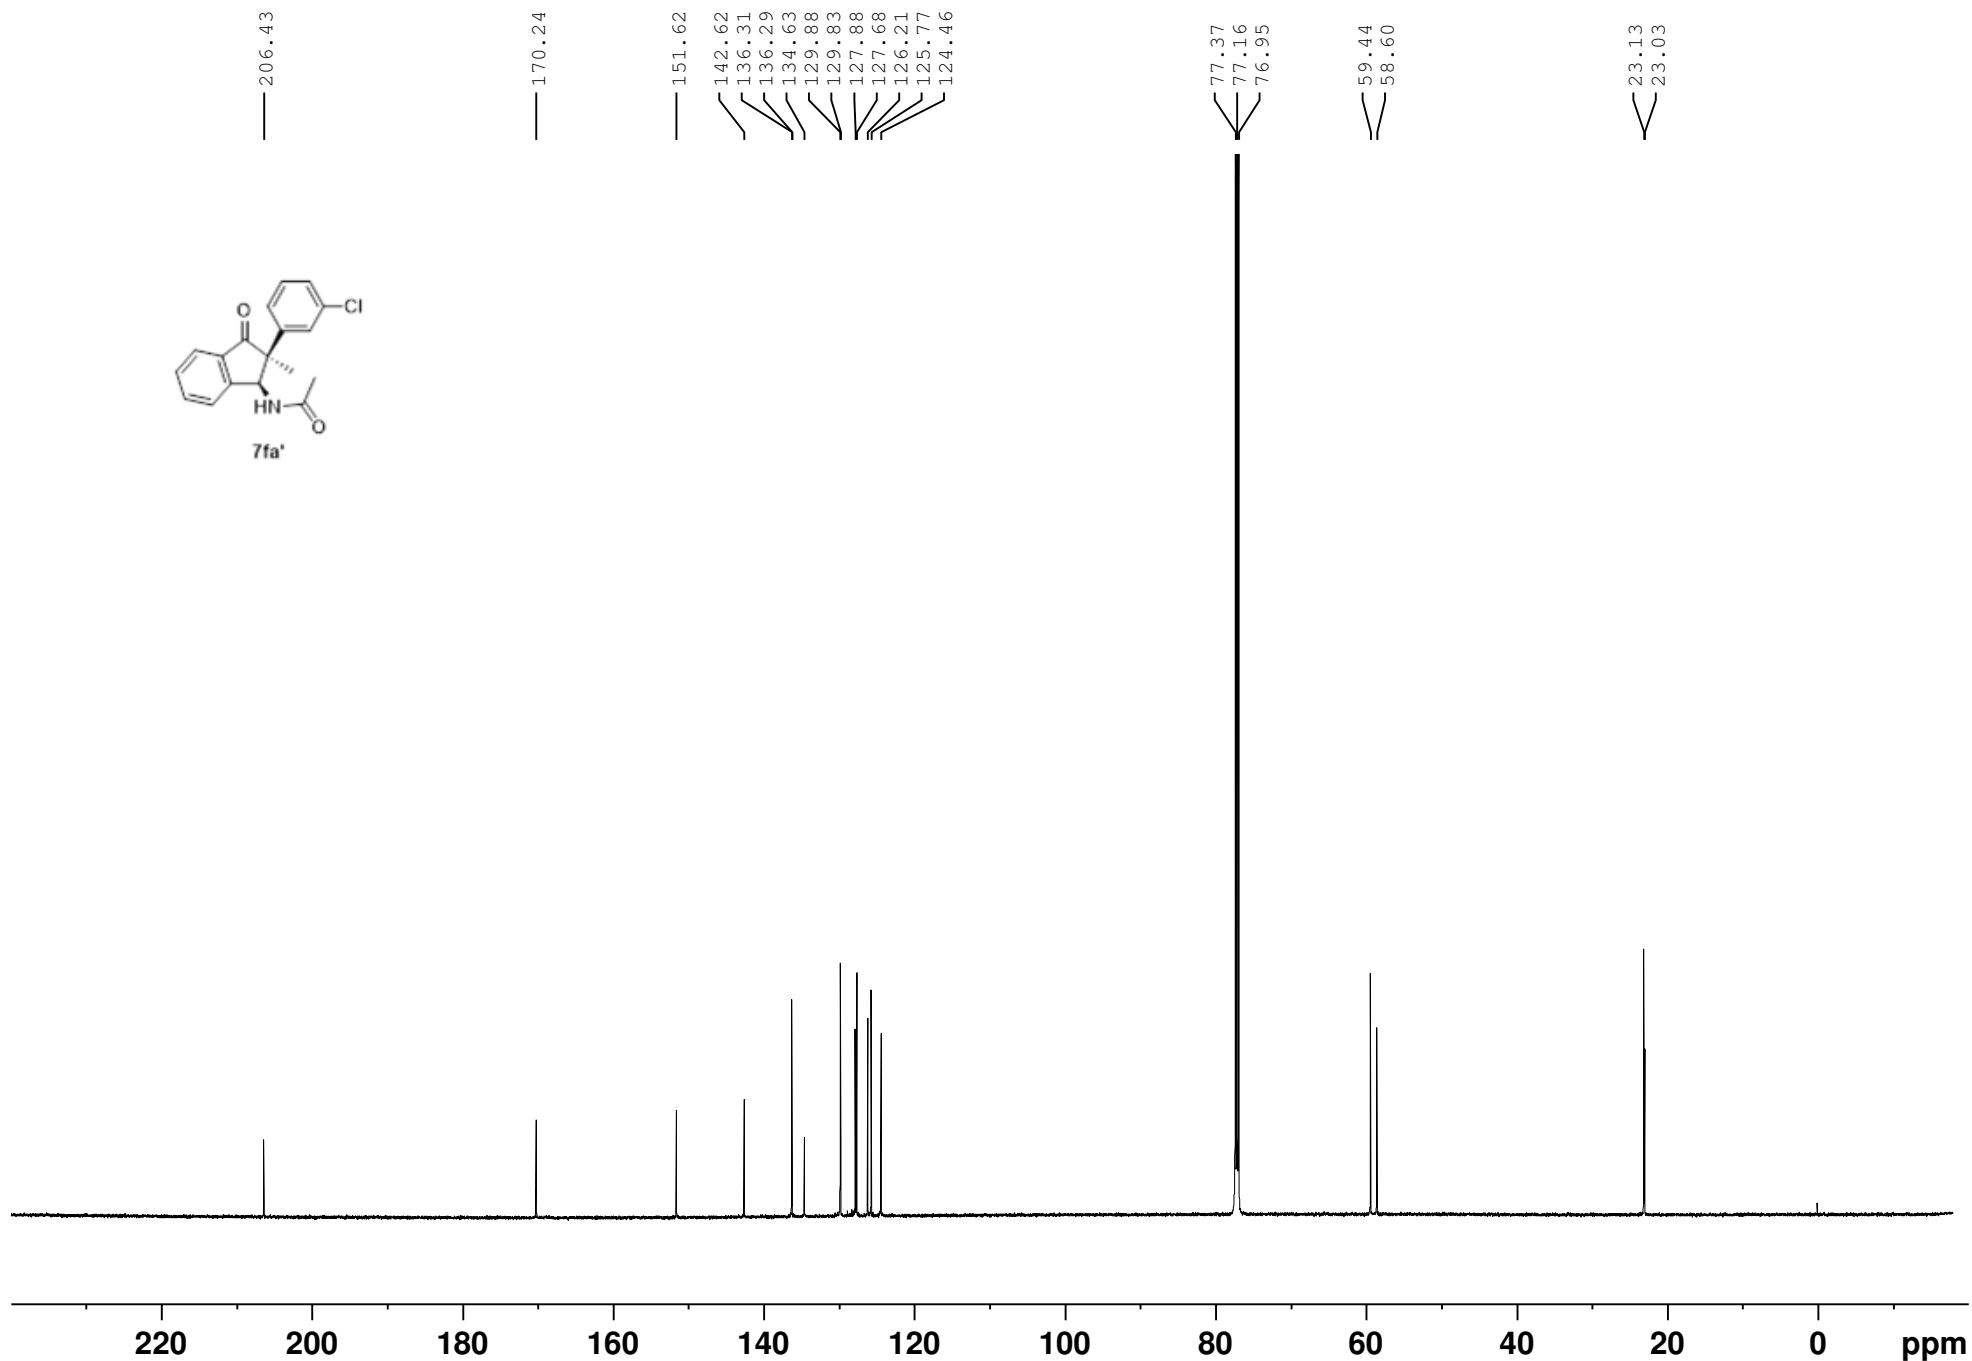

**<sup>1</sup>H NMR (400 MHz, CDCl<sub>3</sub>)**

7.883  
7.864  
7.723  
7.720  
7.704  
7.702  
7.685  
7.683  
7.551  
7.541  
7.532  
7.522  
7.521  
7.516  
7.514  
7.410  
7.406  
7.391  
7.387  
7.370  
7.366  
7.351  
7.347  
7.319  
7.315  
7.301  
7.297  
7.282  
7.277  
7.269  
7.262  
7.250  
7.246  
7.231  
7.227  
6.154  
6.131  
5.864  
5.841

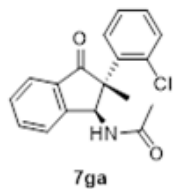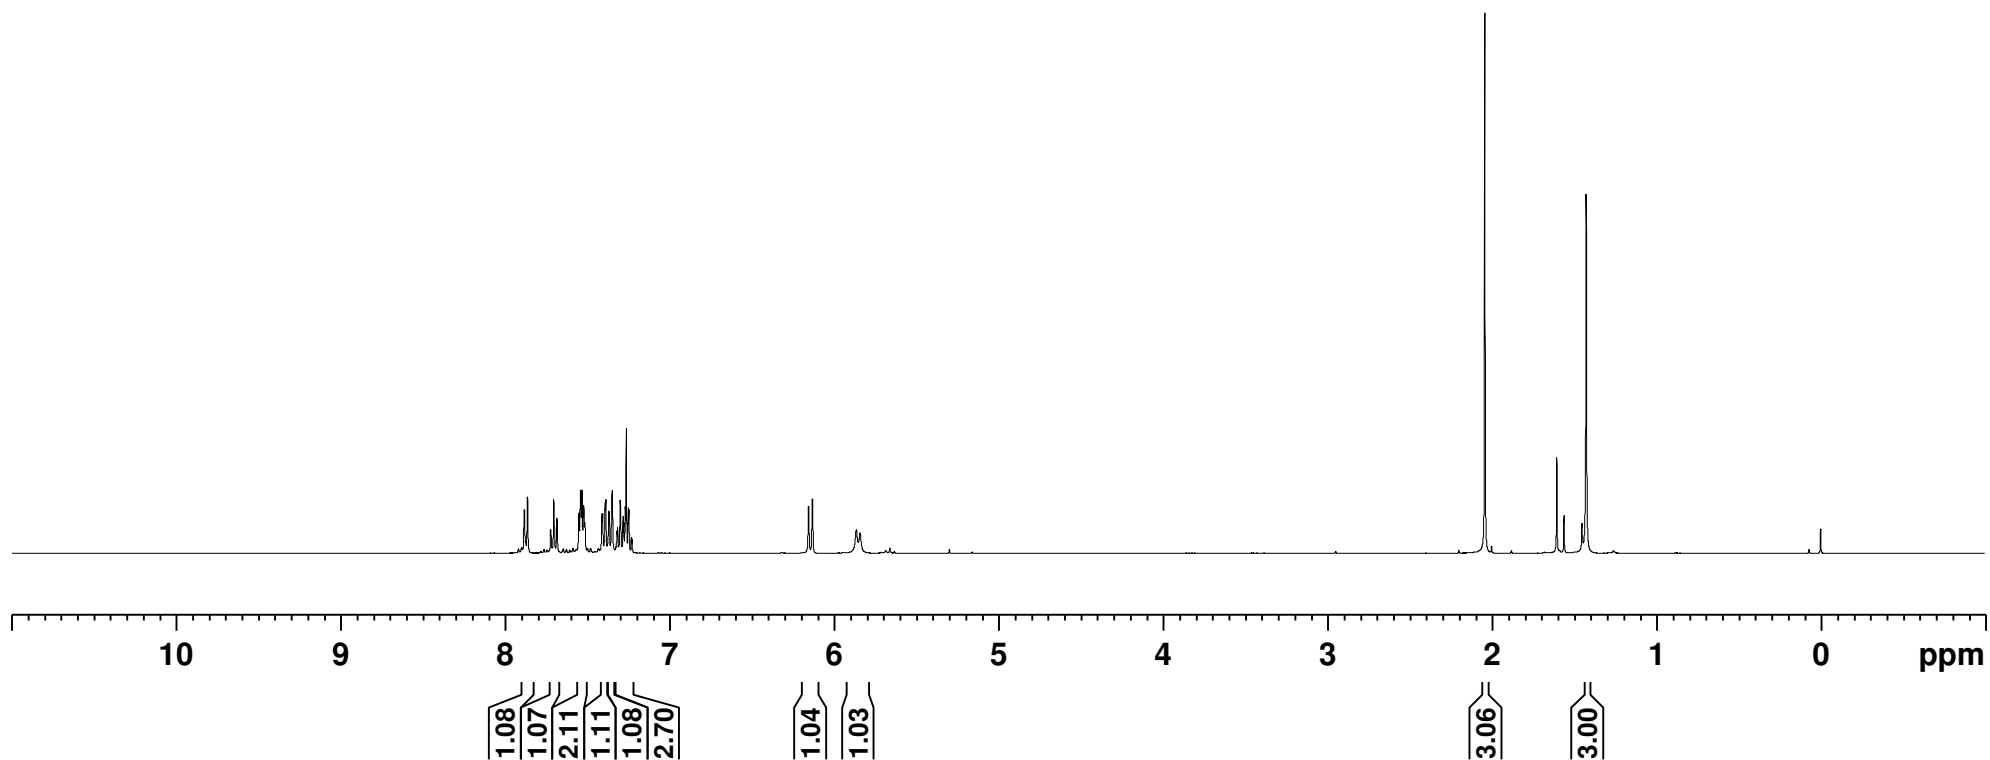

— 2.042

— 1.426

0.071  
-0.000

**<sup>13</sup>C NMR (100 MHz, CDCl<sub>3</sub>)**

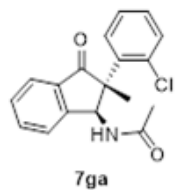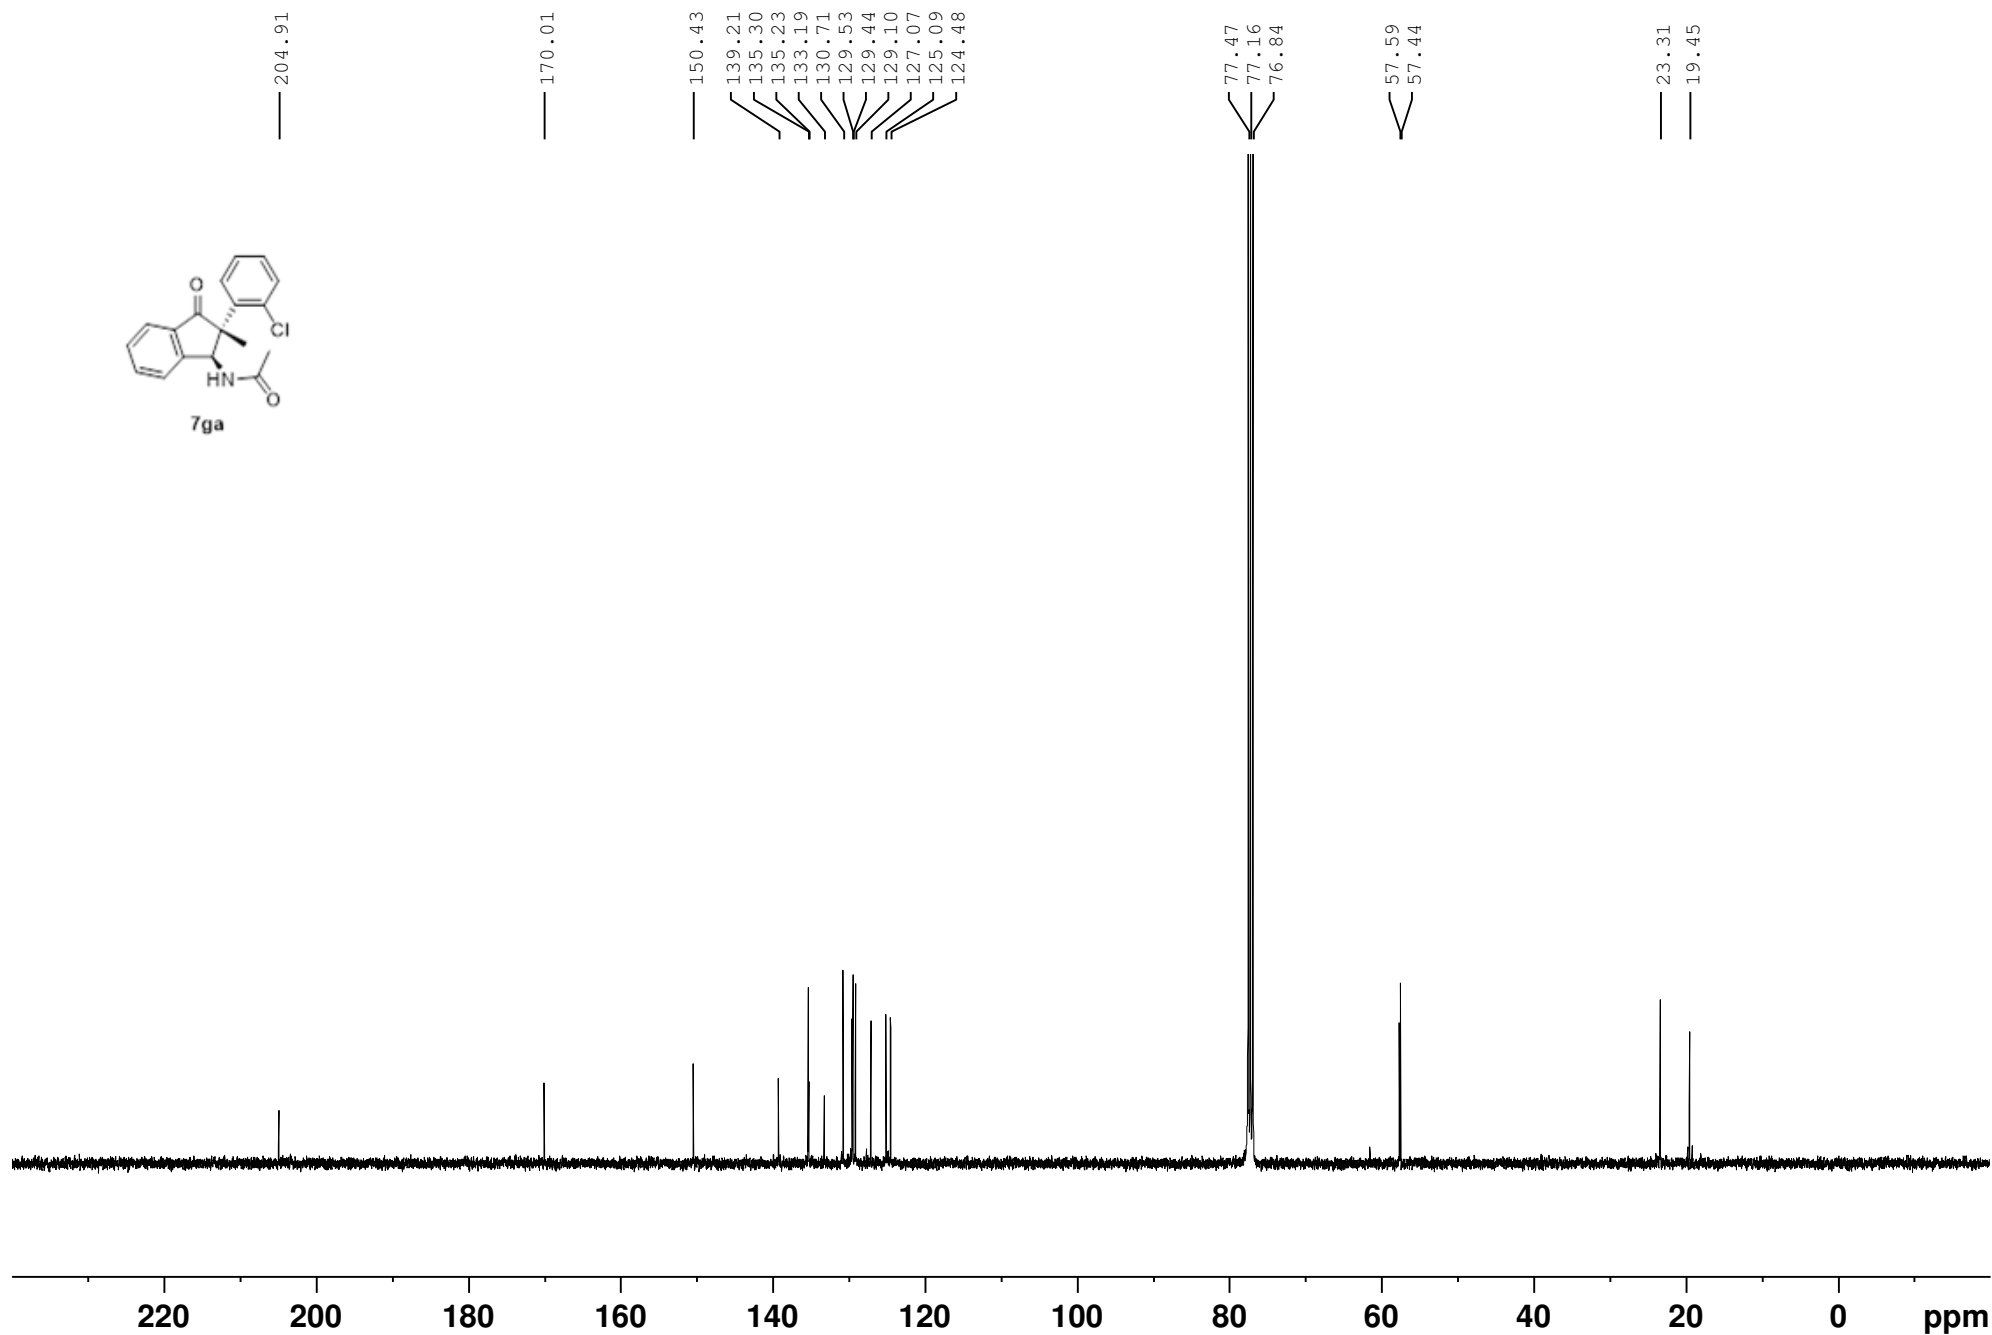

<sup>1</sup>H NMR (400 MHz, CDCl<sub>3</sub>)

7.901  
7.882  
7.741  
7.739  
7.720  
7.704  
7.701  
7.643  
7.639  
7.623  
7.619  
7.578  
7.558  
7.539  
7.371  
7.367  
7.353  
7.349  
7.334  
7.329  
7.320  
7.316  
7.300  
7.296  
7.276  
7.272  
7.266  
7.258  
7.256  
7.254  
7.238  
7.234  
6.032  
6.013  
5.586  
5.563

— 1.793  
— 1.560

< 0.071  
< -0.000

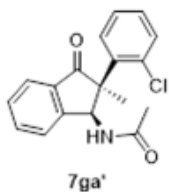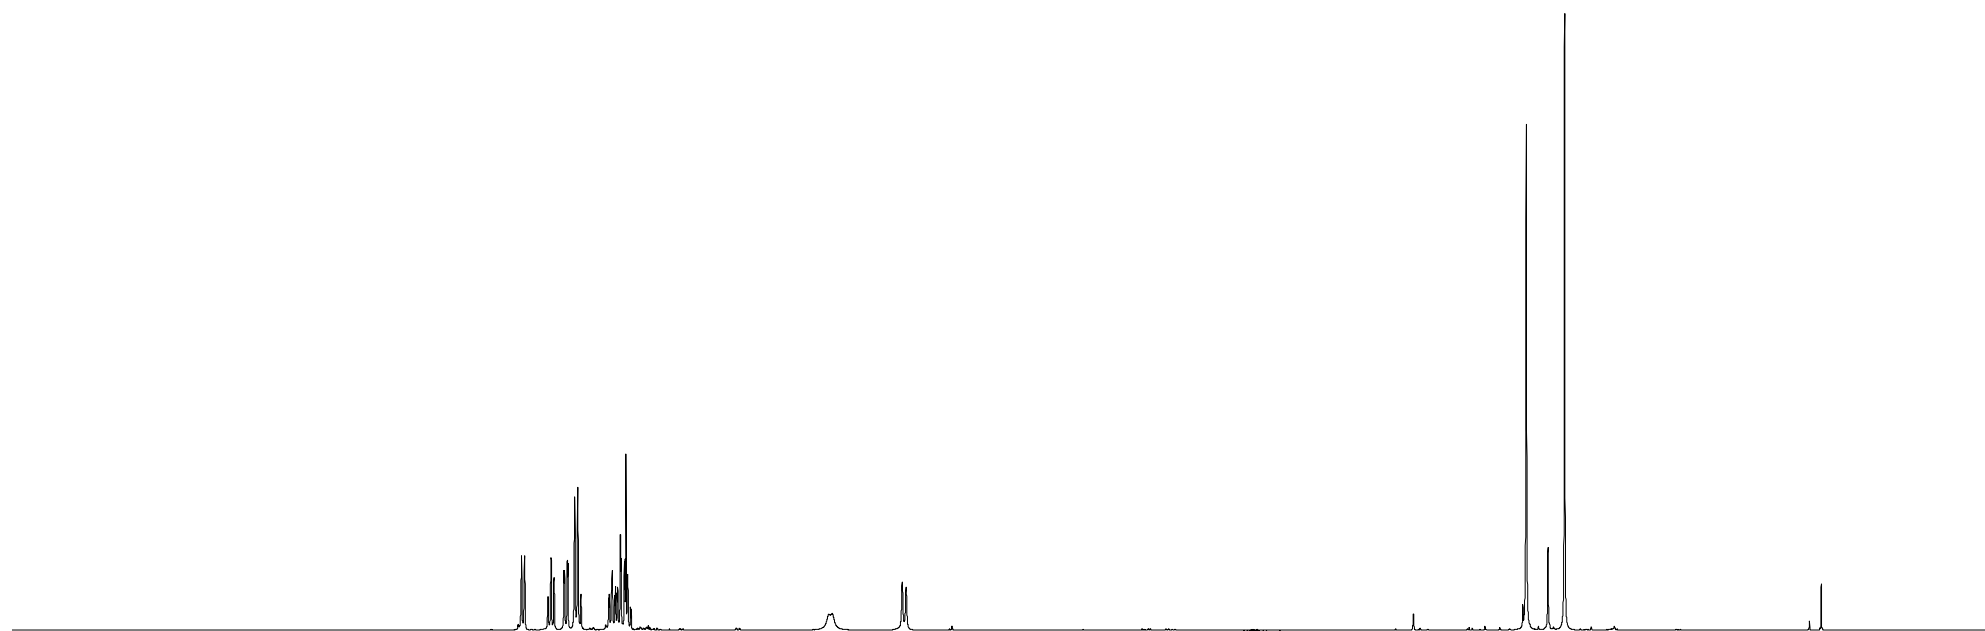

1.07  
1.06  
1.05  
2.05  
3.64

0.90  
1.03

2.97  
3.00

<sup>13</sup>C NMR (100 MHz, CDCl<sub>3</sub>)

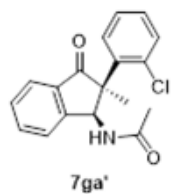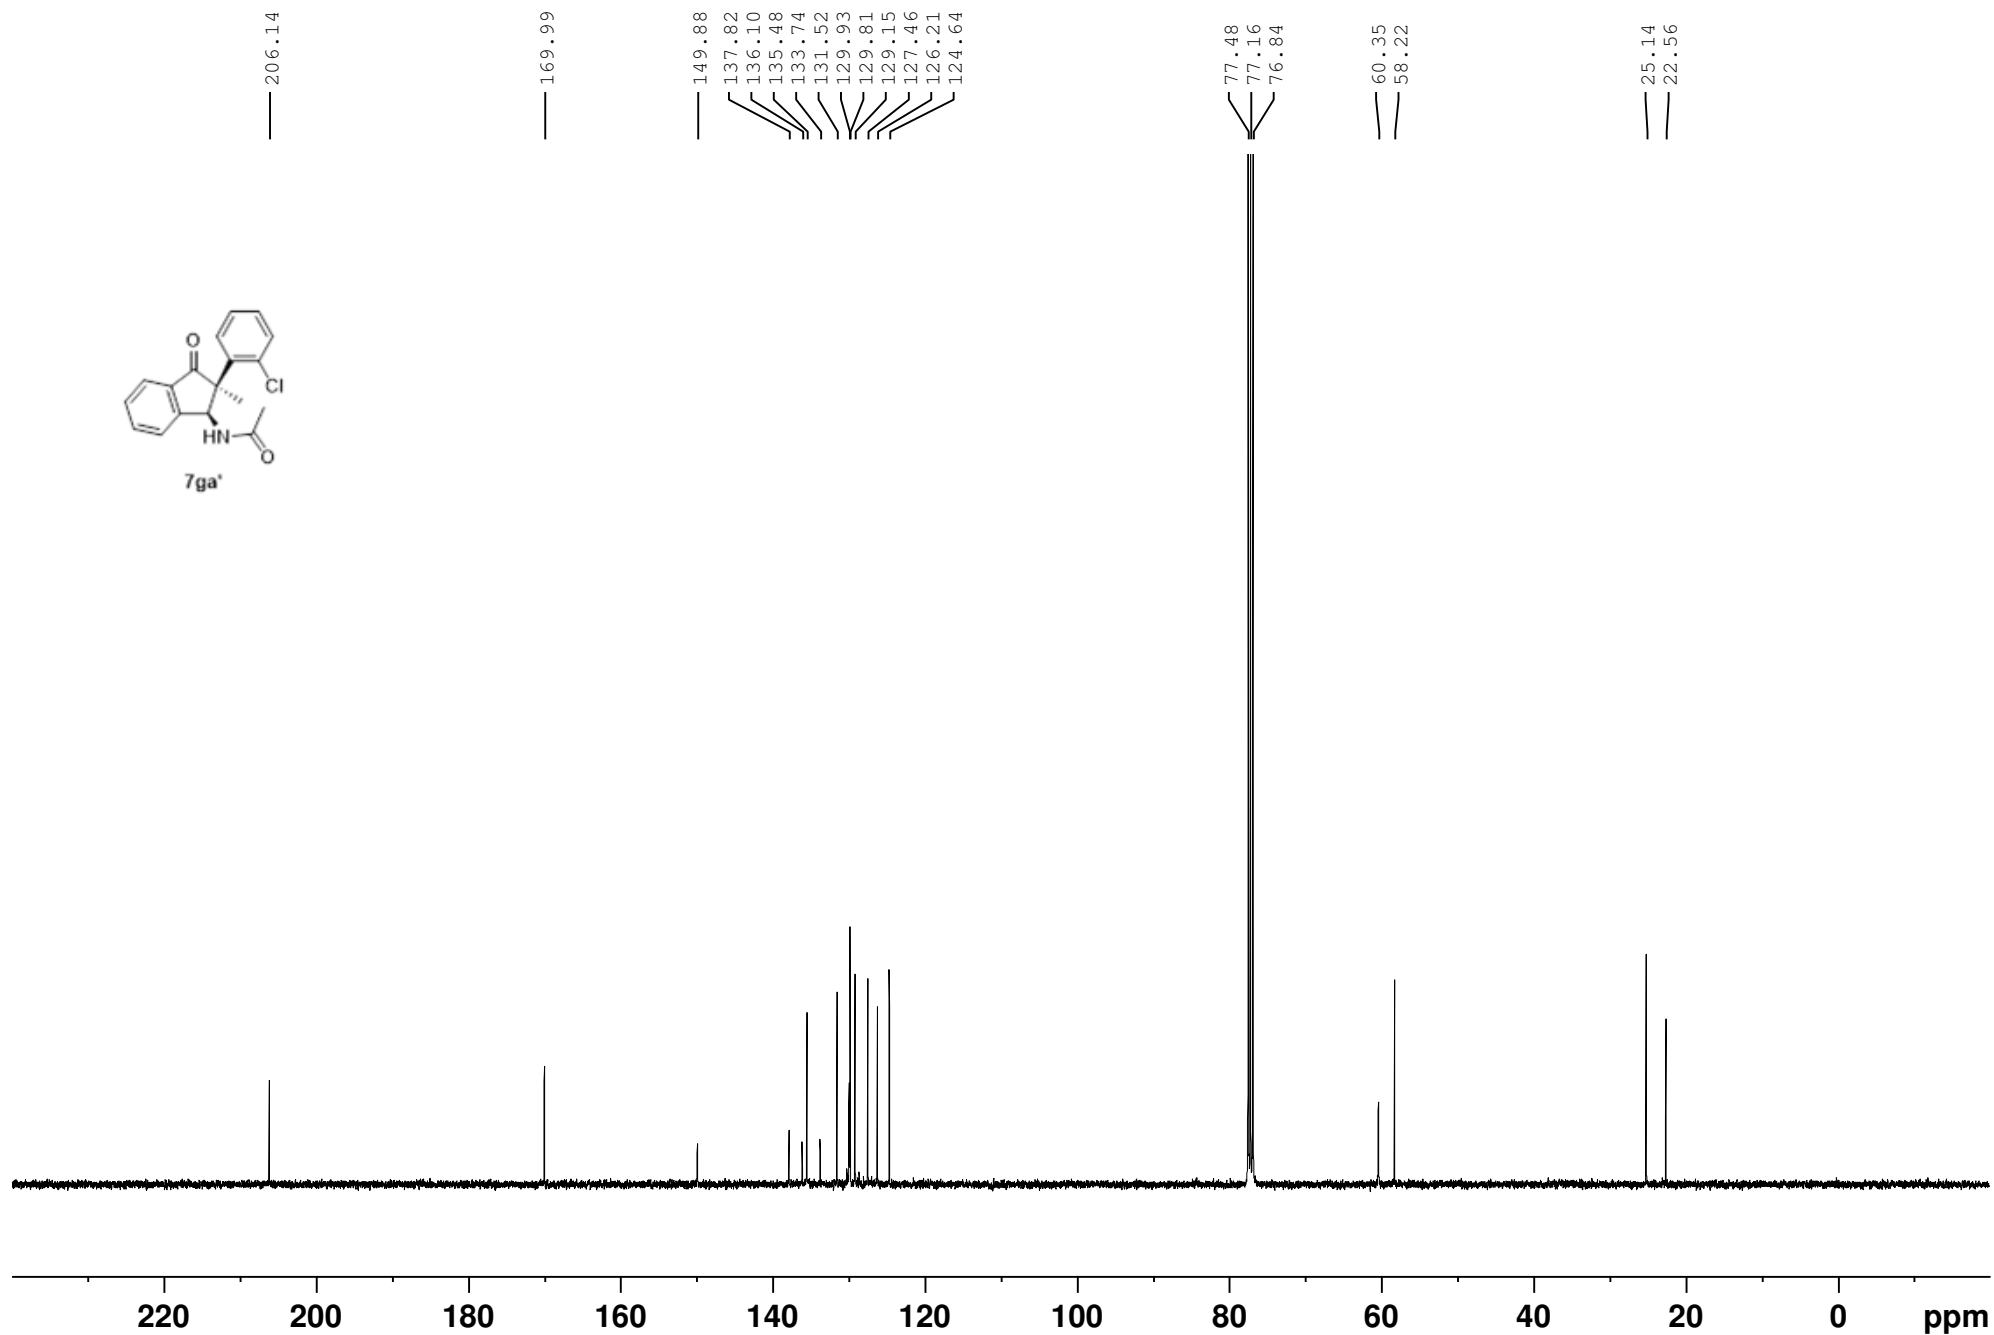

<sup>1</sup>H NMR (400 MHz, CDCl<sub>3</sub>)

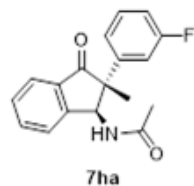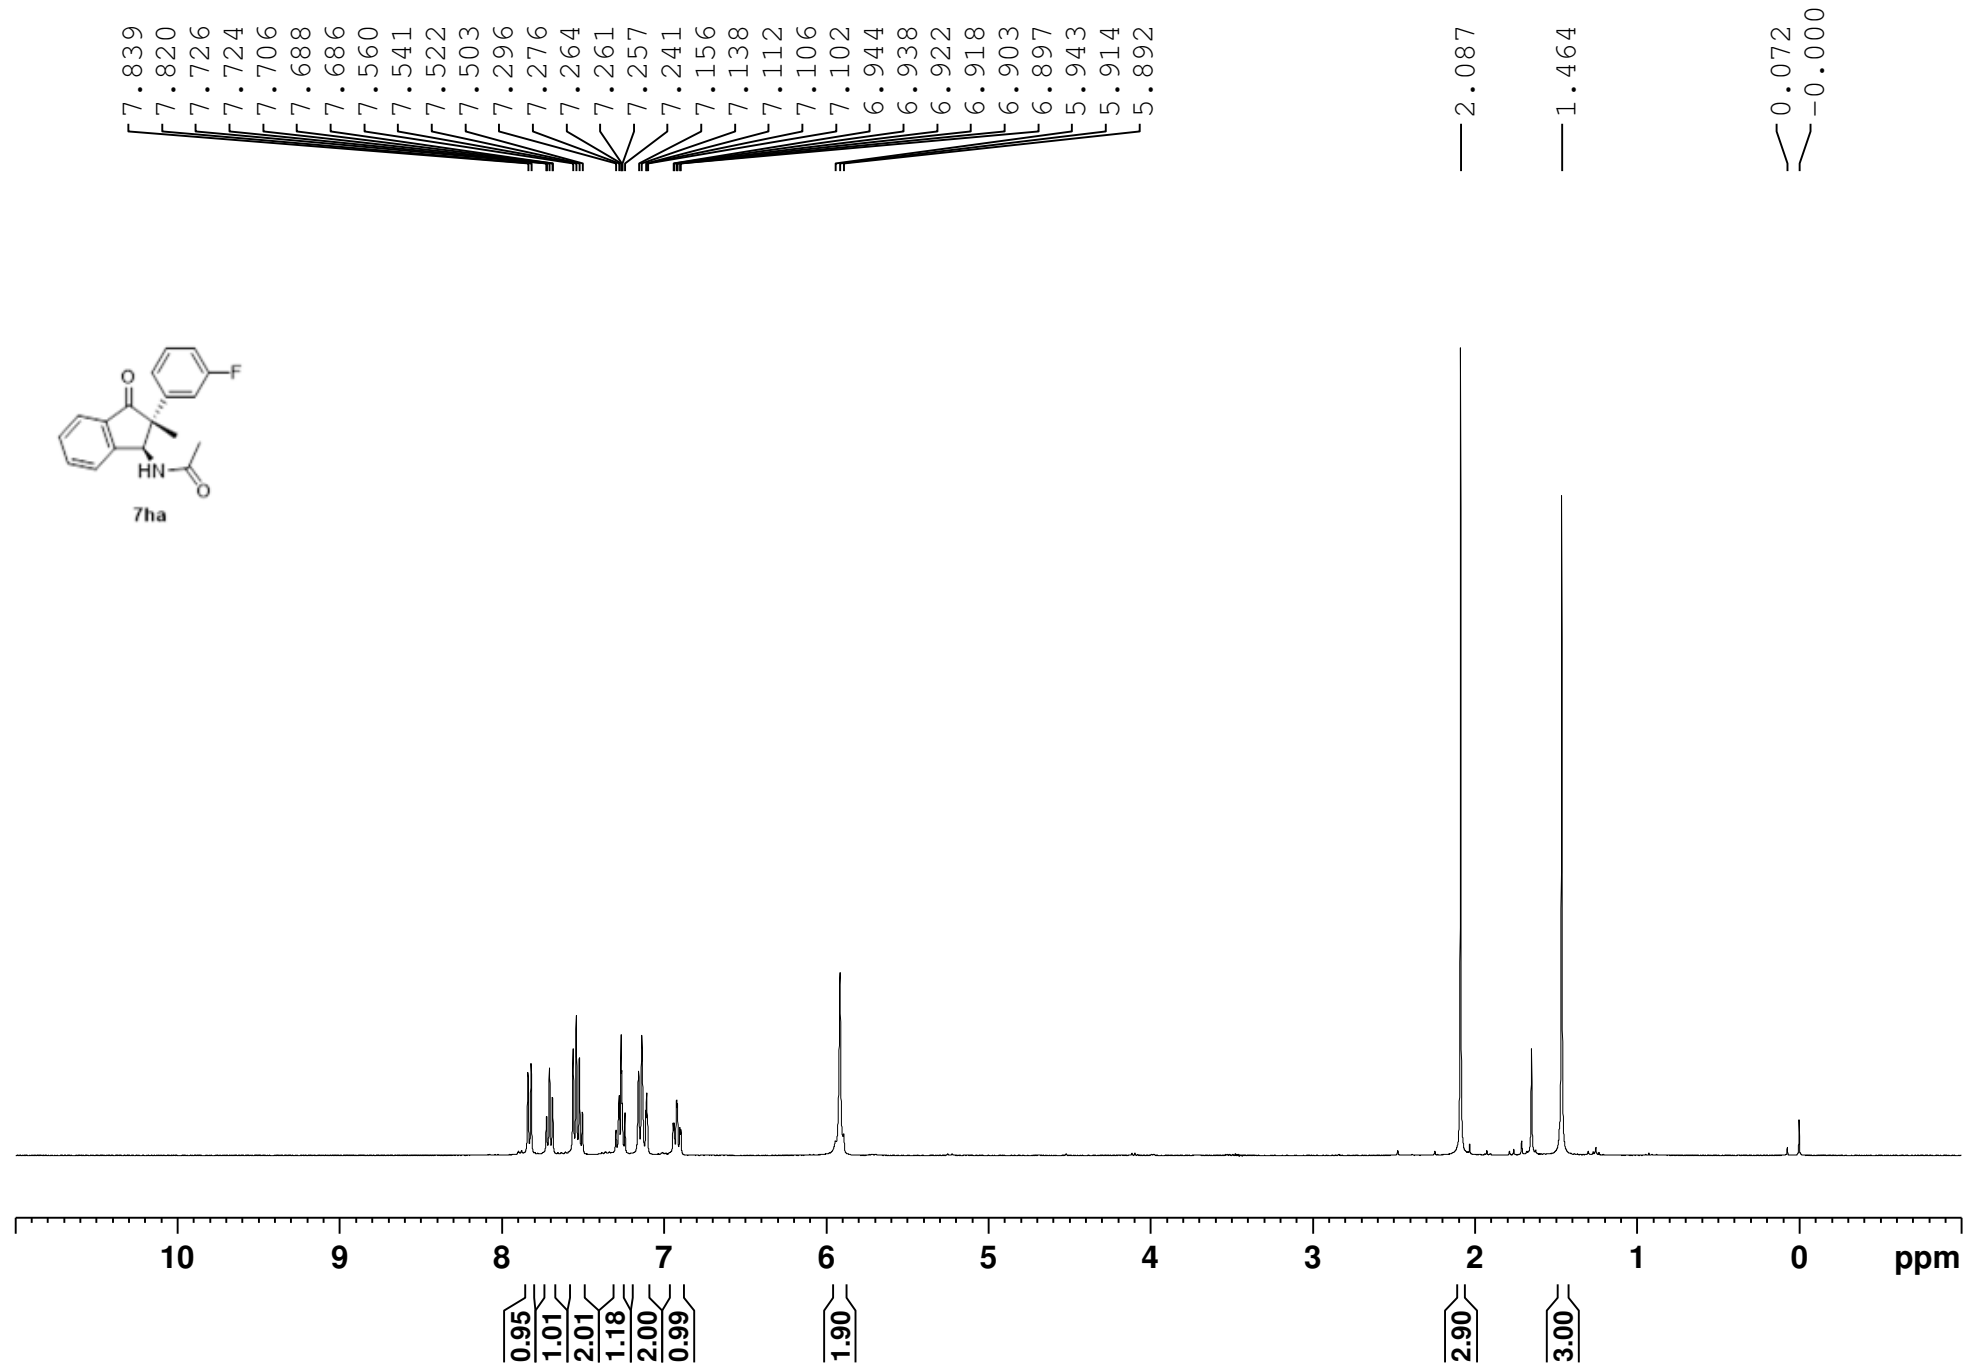

<sup>13</sup>C NMR (150 MHz, CDCl<sub>3</sub>)

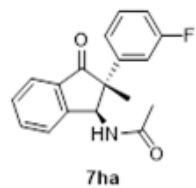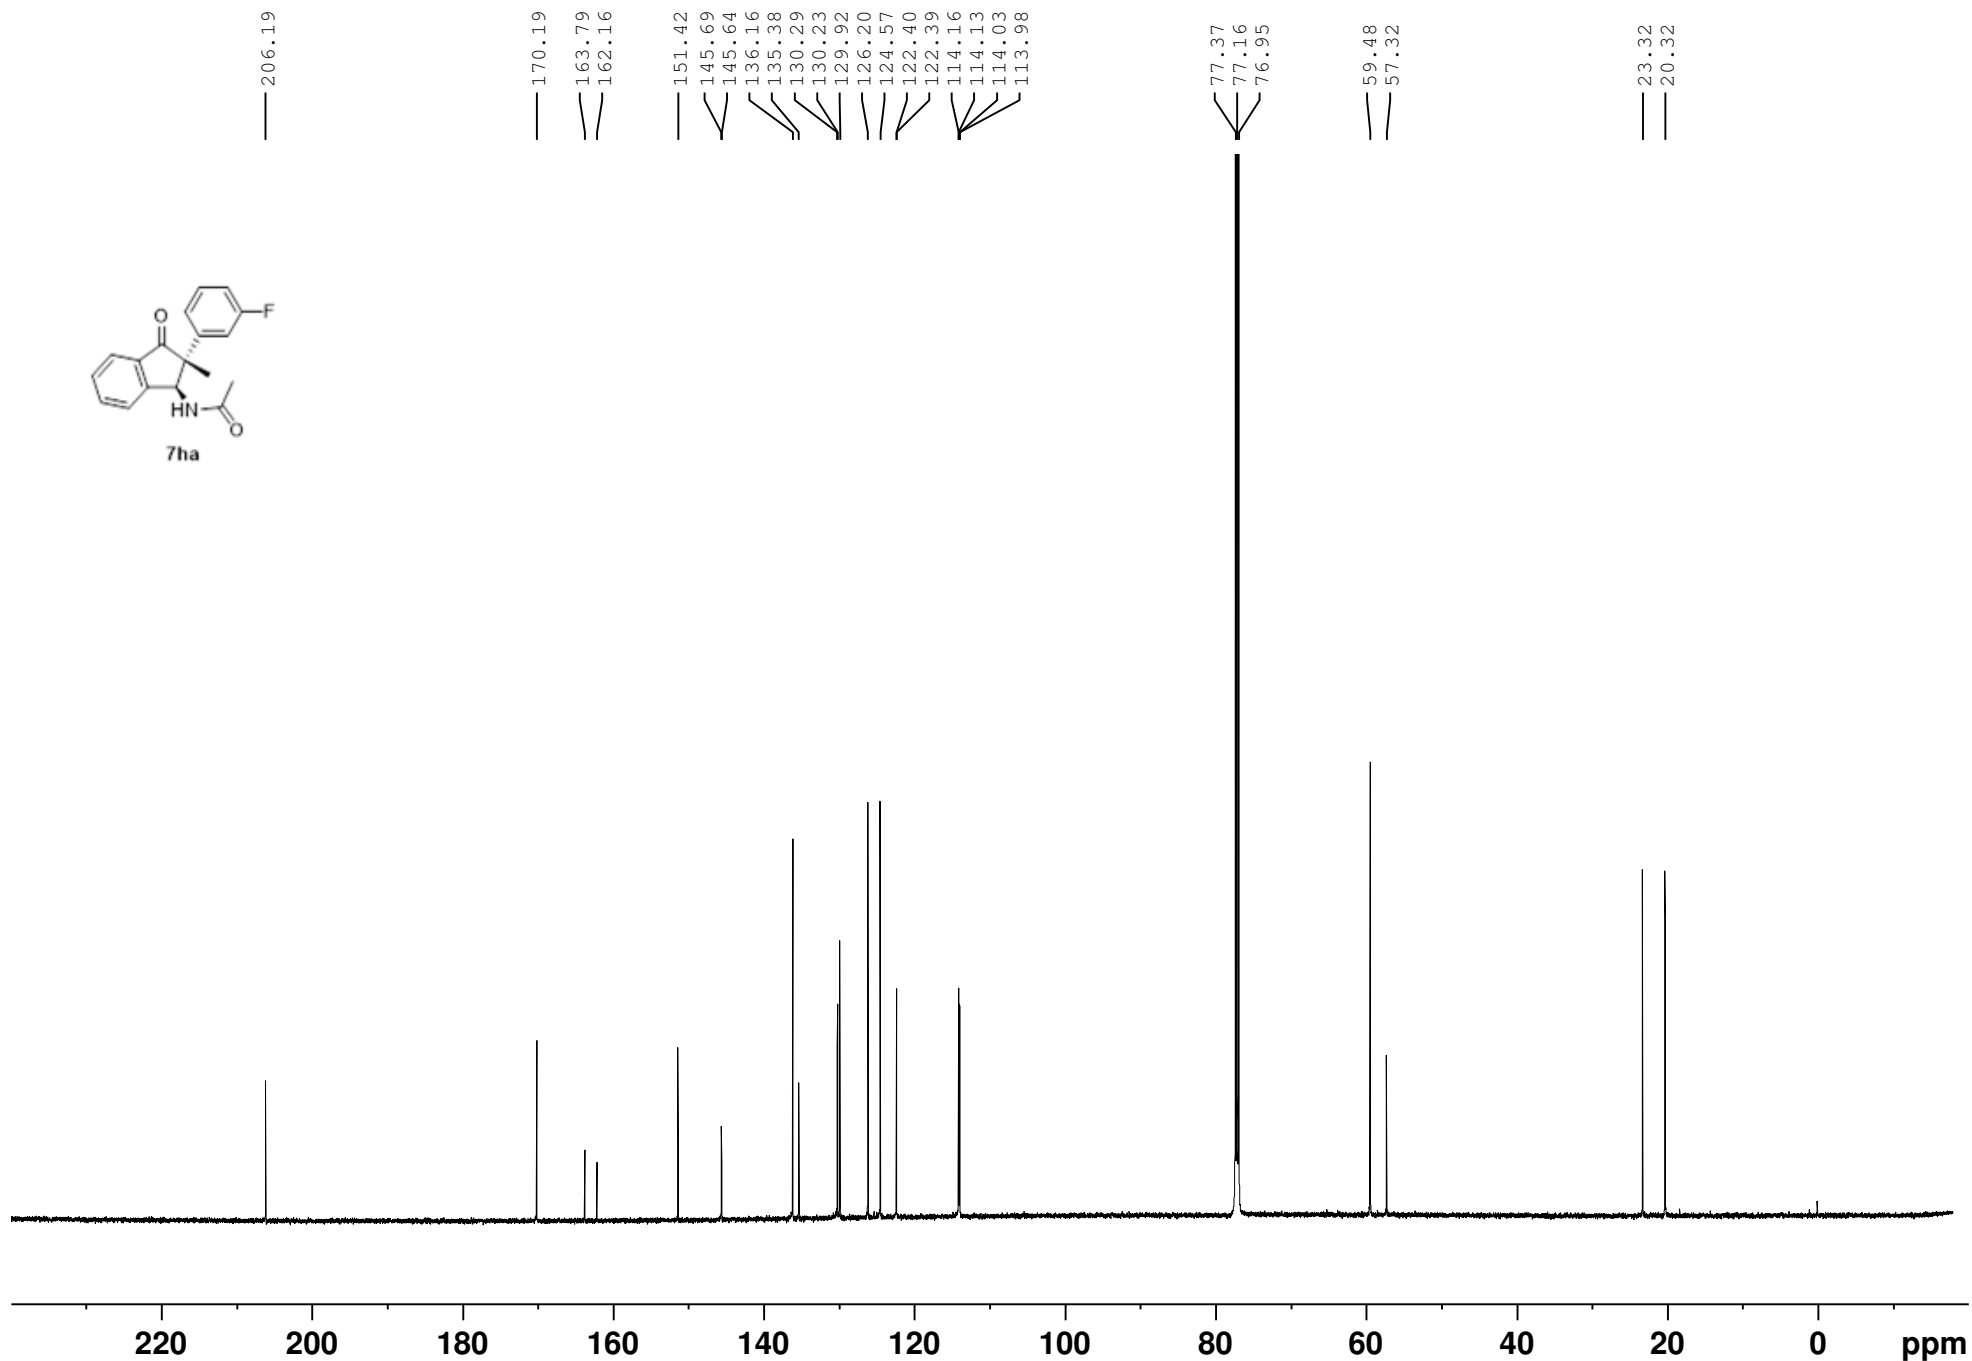

**<sup>19</sup>F NMR (376 MHz, CDCl<sub>3</sub>)**

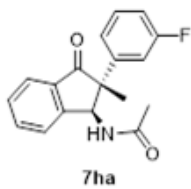

— -112.222

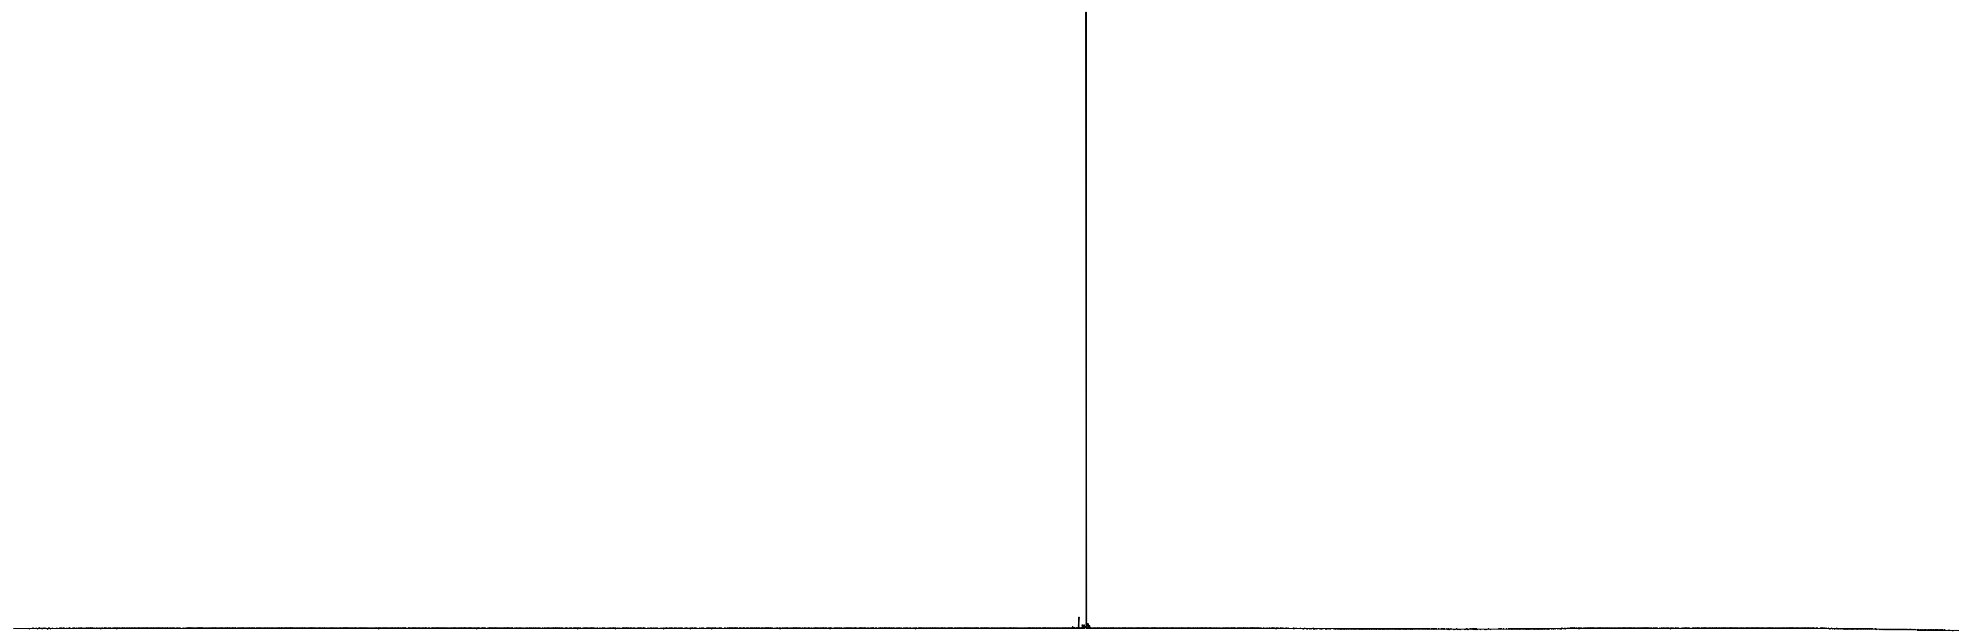

0 -20 -40 -60 -80 -100 -120 -140 -160 -180 -200 ppm



**<sup>1</sup>H NMR (400 MHz, CDCl<sub>3</sub>)**

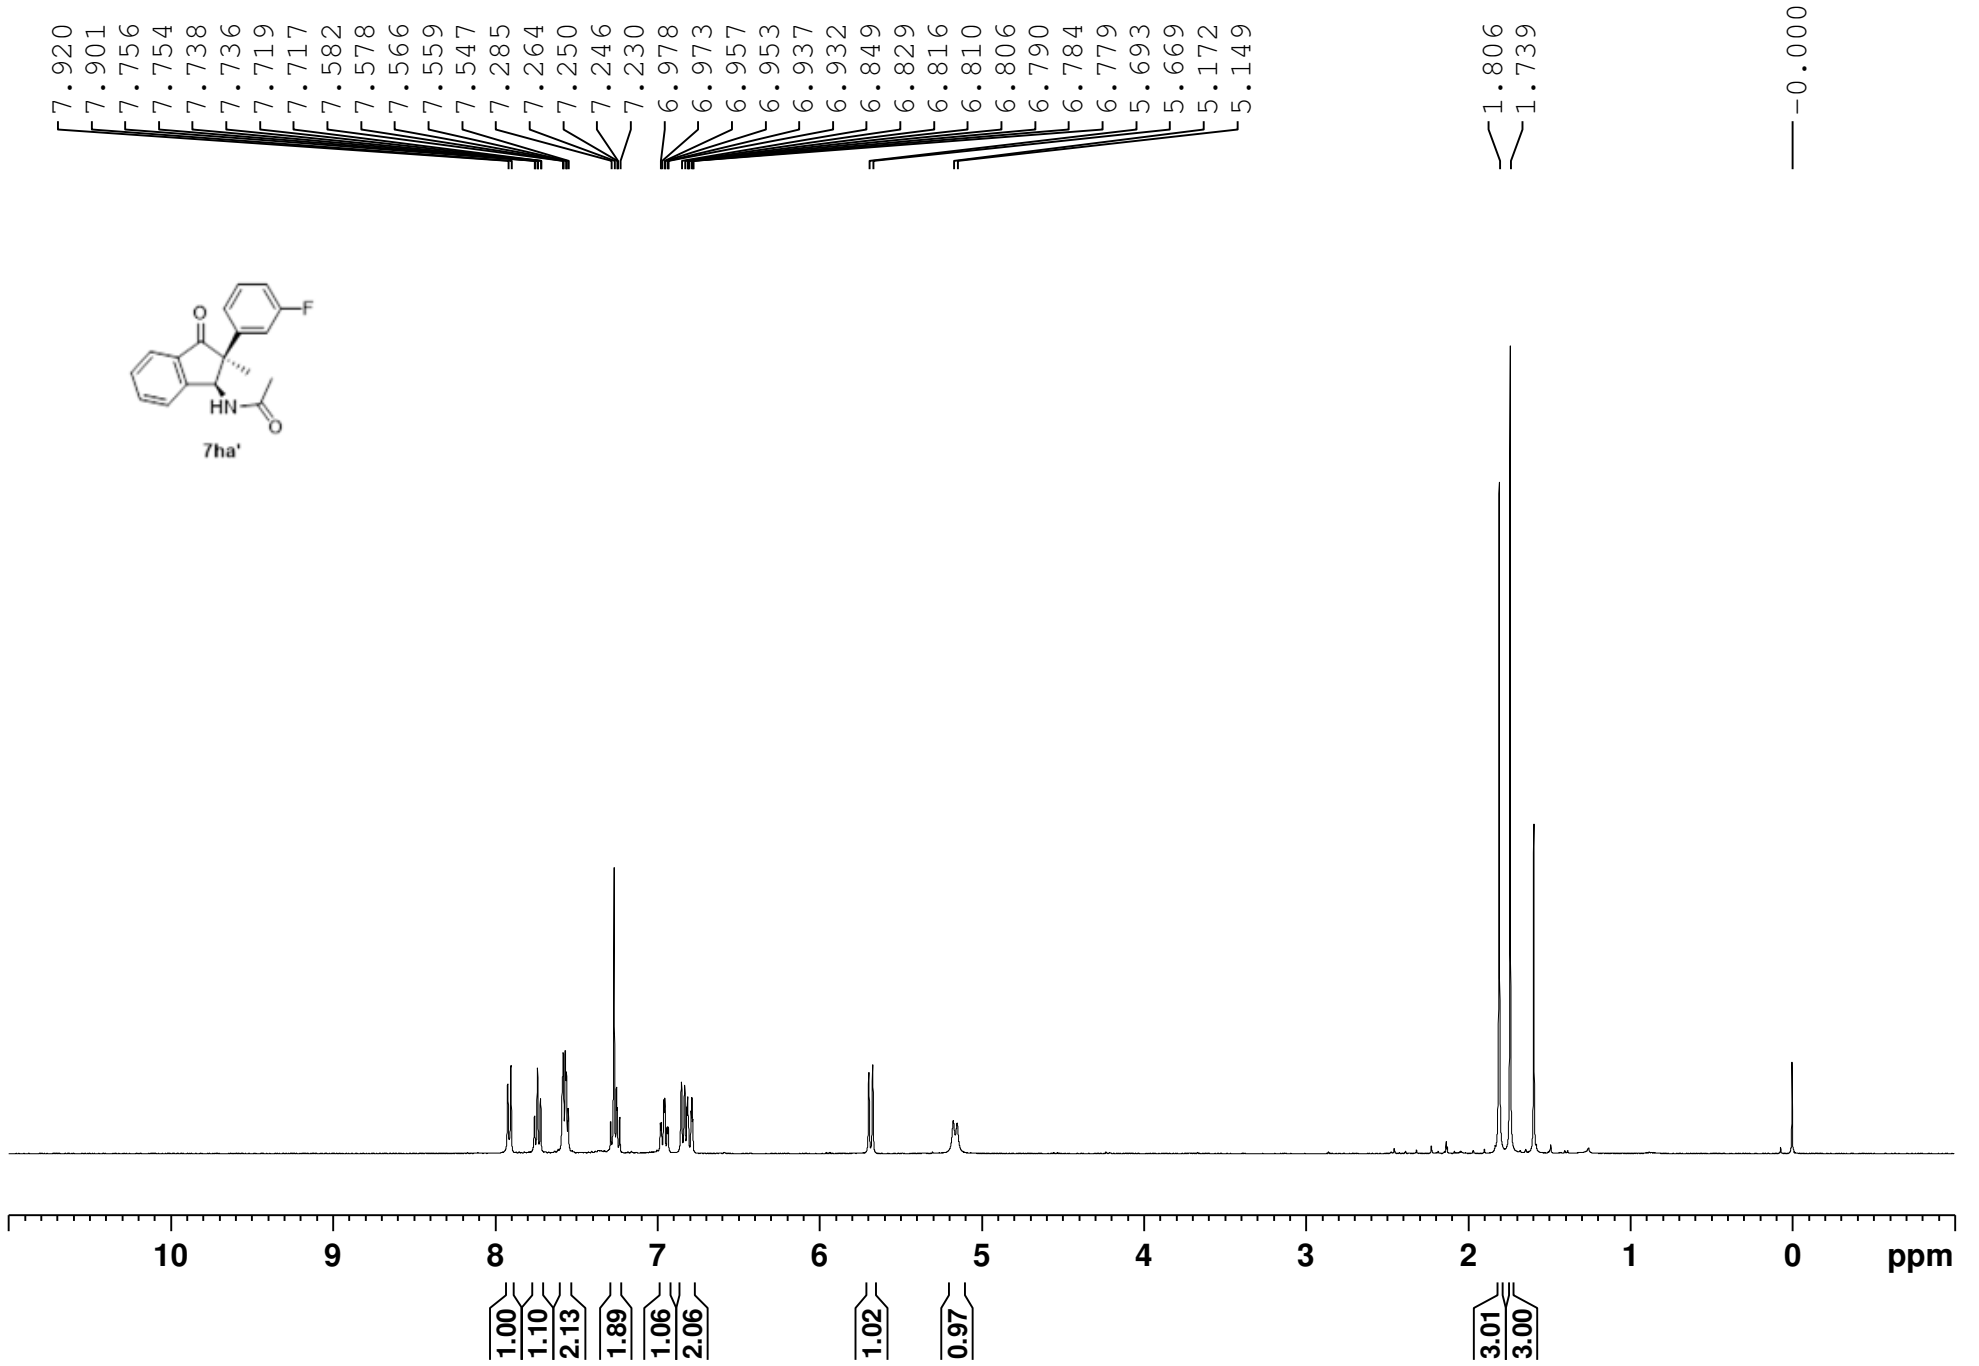

<sup>13</sup>C NMR (150 MHz, CDCl<sub>3</sub>)

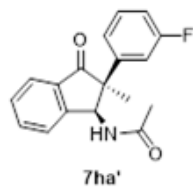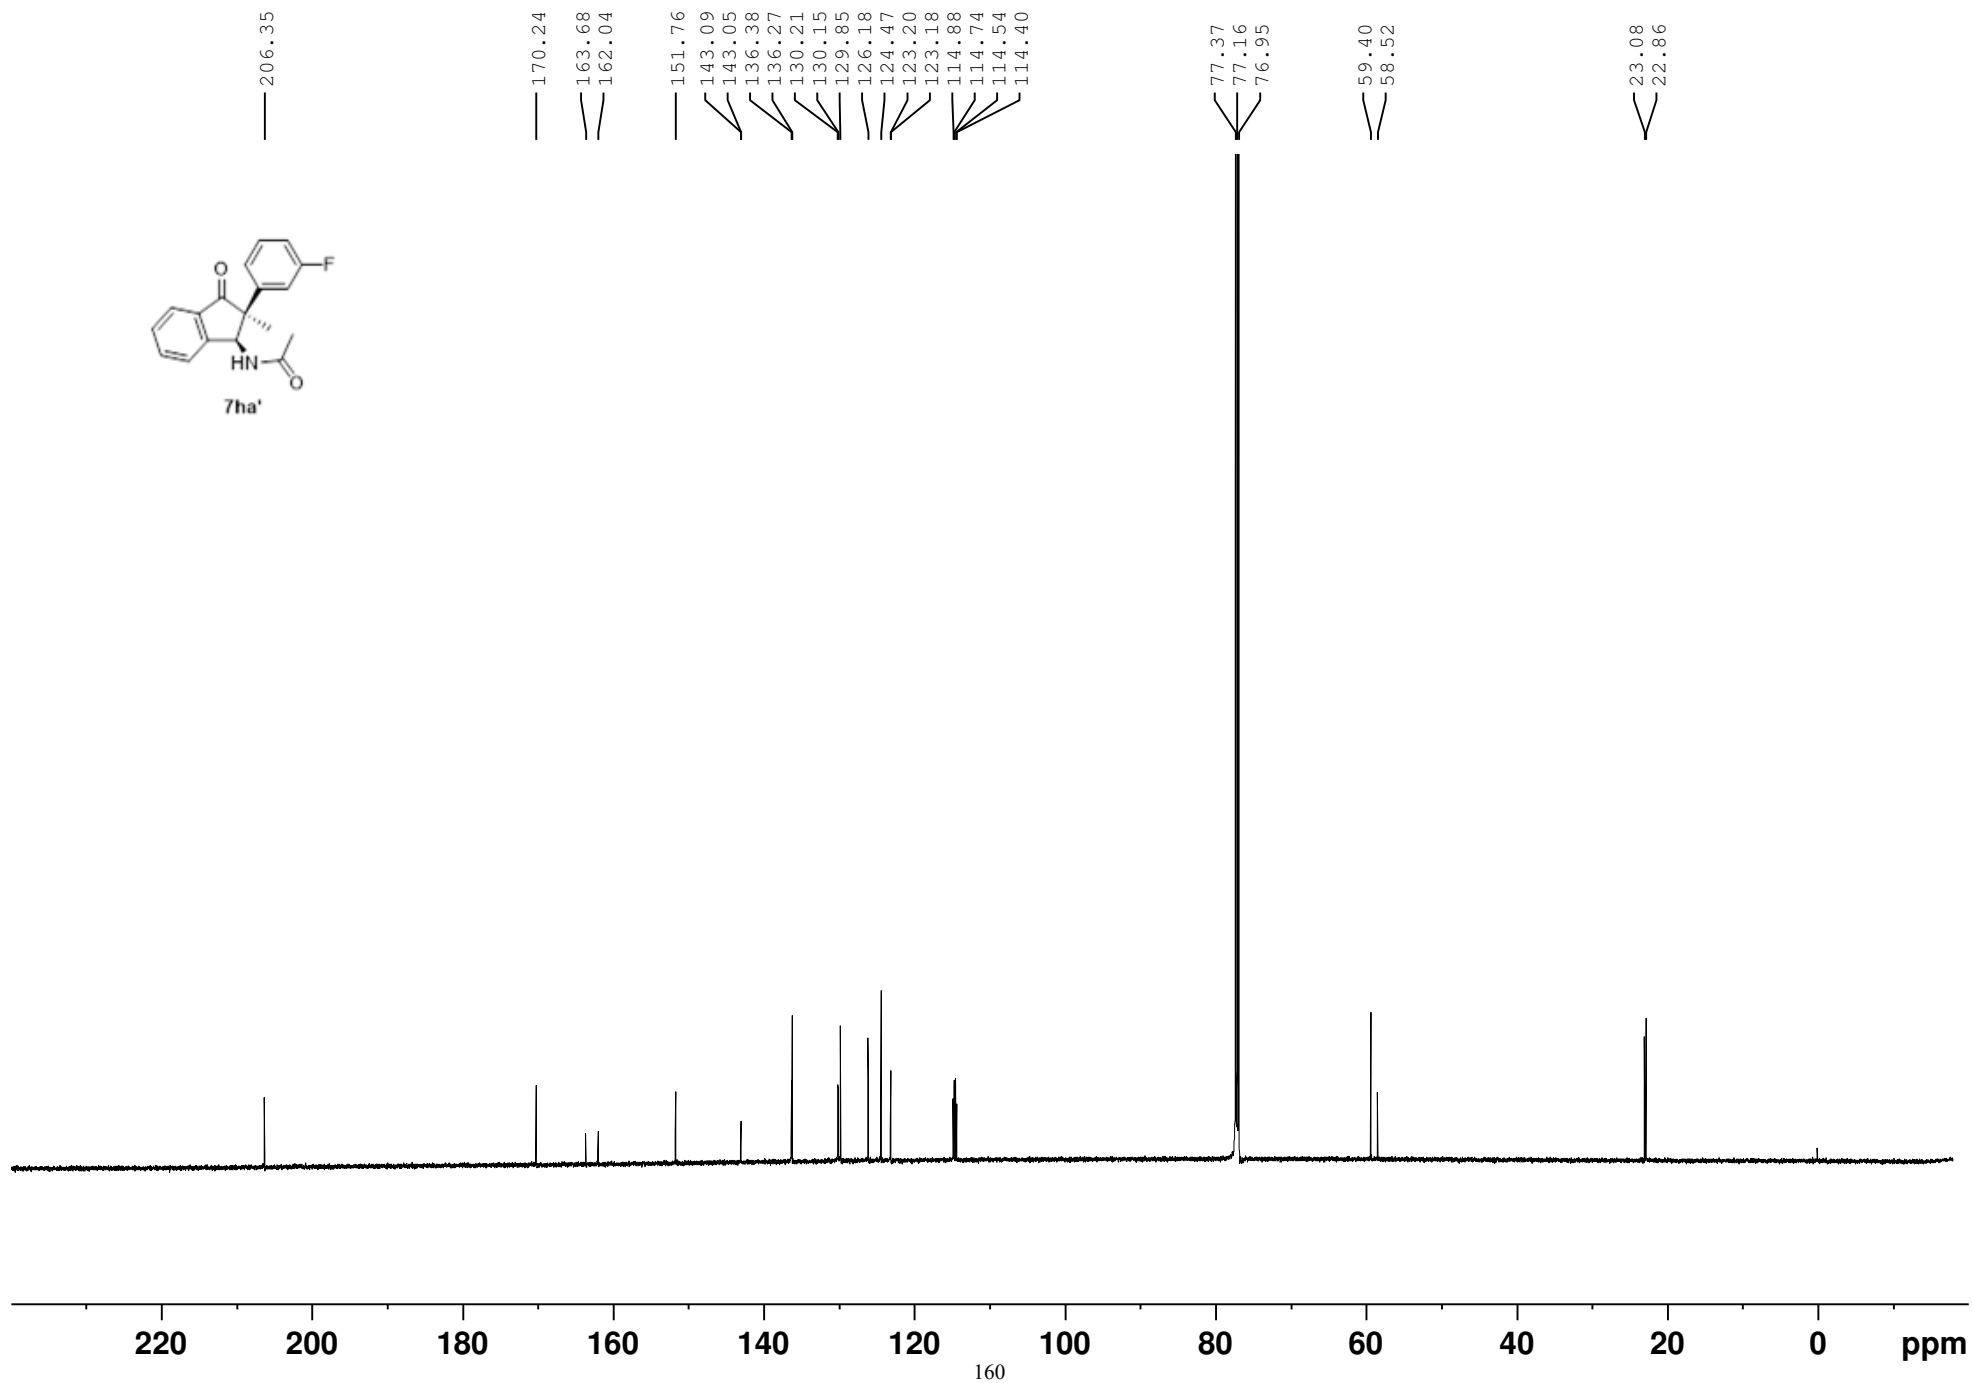

**$^{19}\text{F}$  NMR (376 MHz,  $\text{CDCl}_3$ )**

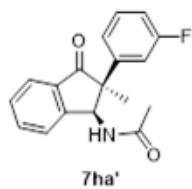

— -111.740

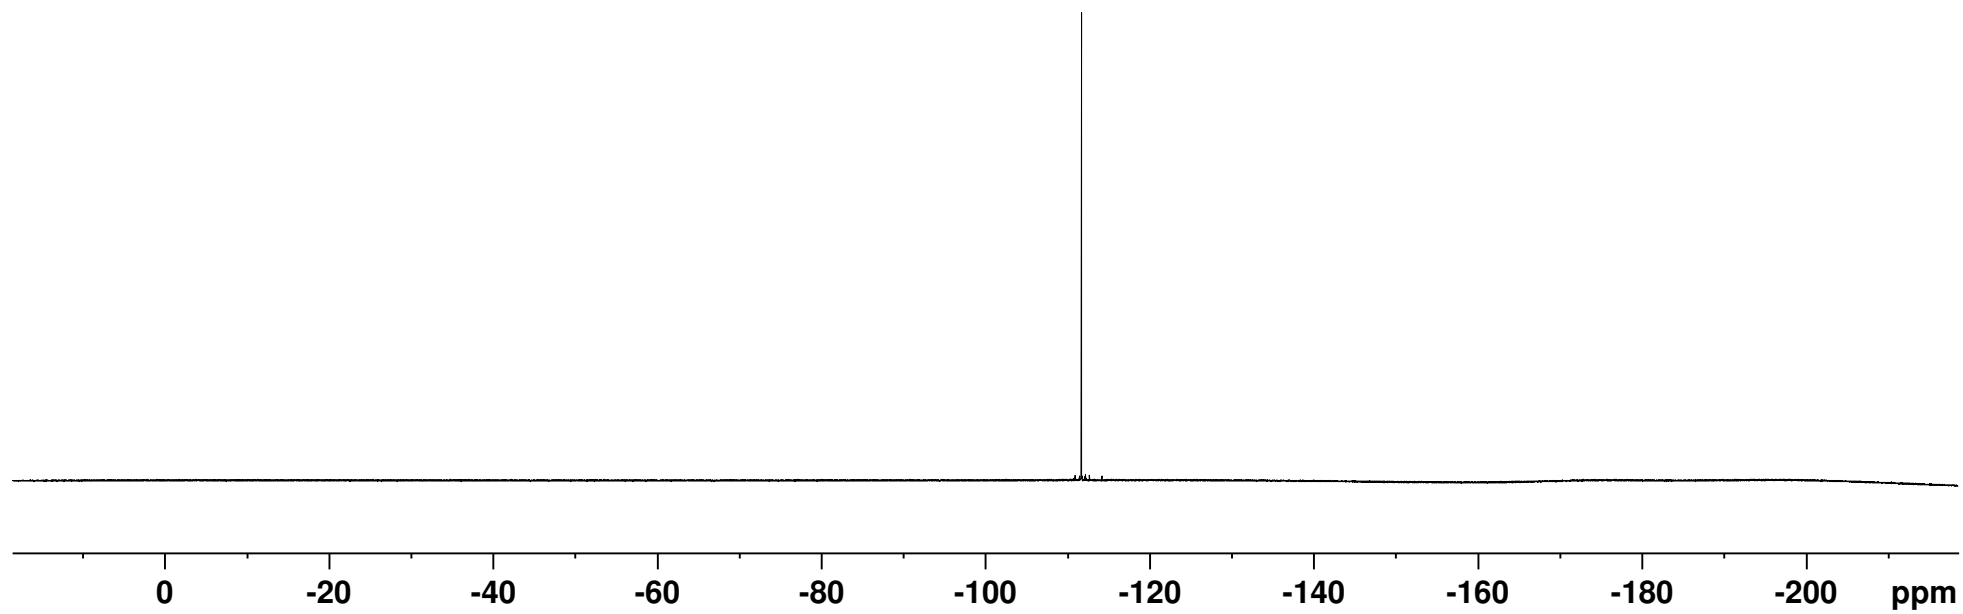

**<sup>1</sup>H NMR (400 MHz, CDCl<sub>3</sub>)**

7.887  
7.884  
7.866  
7.737  
7.735  
7.718  
7.716  
7.700  
7.698  
7.555  
7.536  
7.518  
7.373  
7.369  
7.353  
7.350  
7.334  
7.330  
7.306  
7.287  
7.283  
7.267  
7.250  
7.184  
7.181  
7.165  
7.162  
7.146  
7.143  
7.030  
7.027  
7.009  
7.007  
7.001  
6.998  
6.981  
6.978  
5.904  
5.881  
5.800  
5.777

— 2.076

— 1.440

0.070  
-0.000

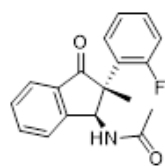

7ia

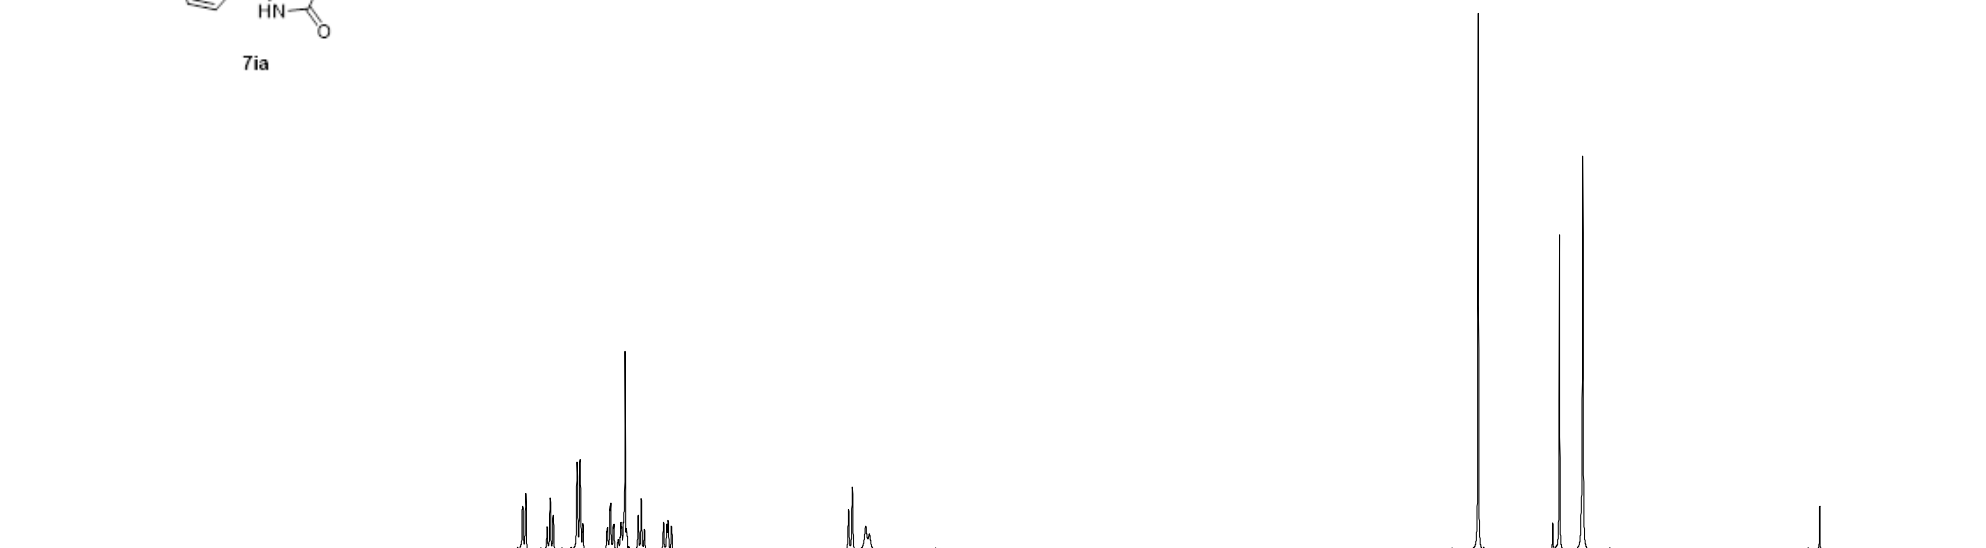

10 9 8 7 6 5 4 3 2 1 0 ppm

0.96  
1.00  
1.98  
1.08  
0.78  
0.23  
0.98  
0.96

1.02  
0.93

2.98

3.00

<sup>13</sup>C NMR (150 MHz, CDCl<sub>3</sub>)

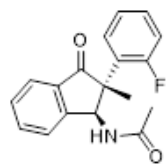

7ia

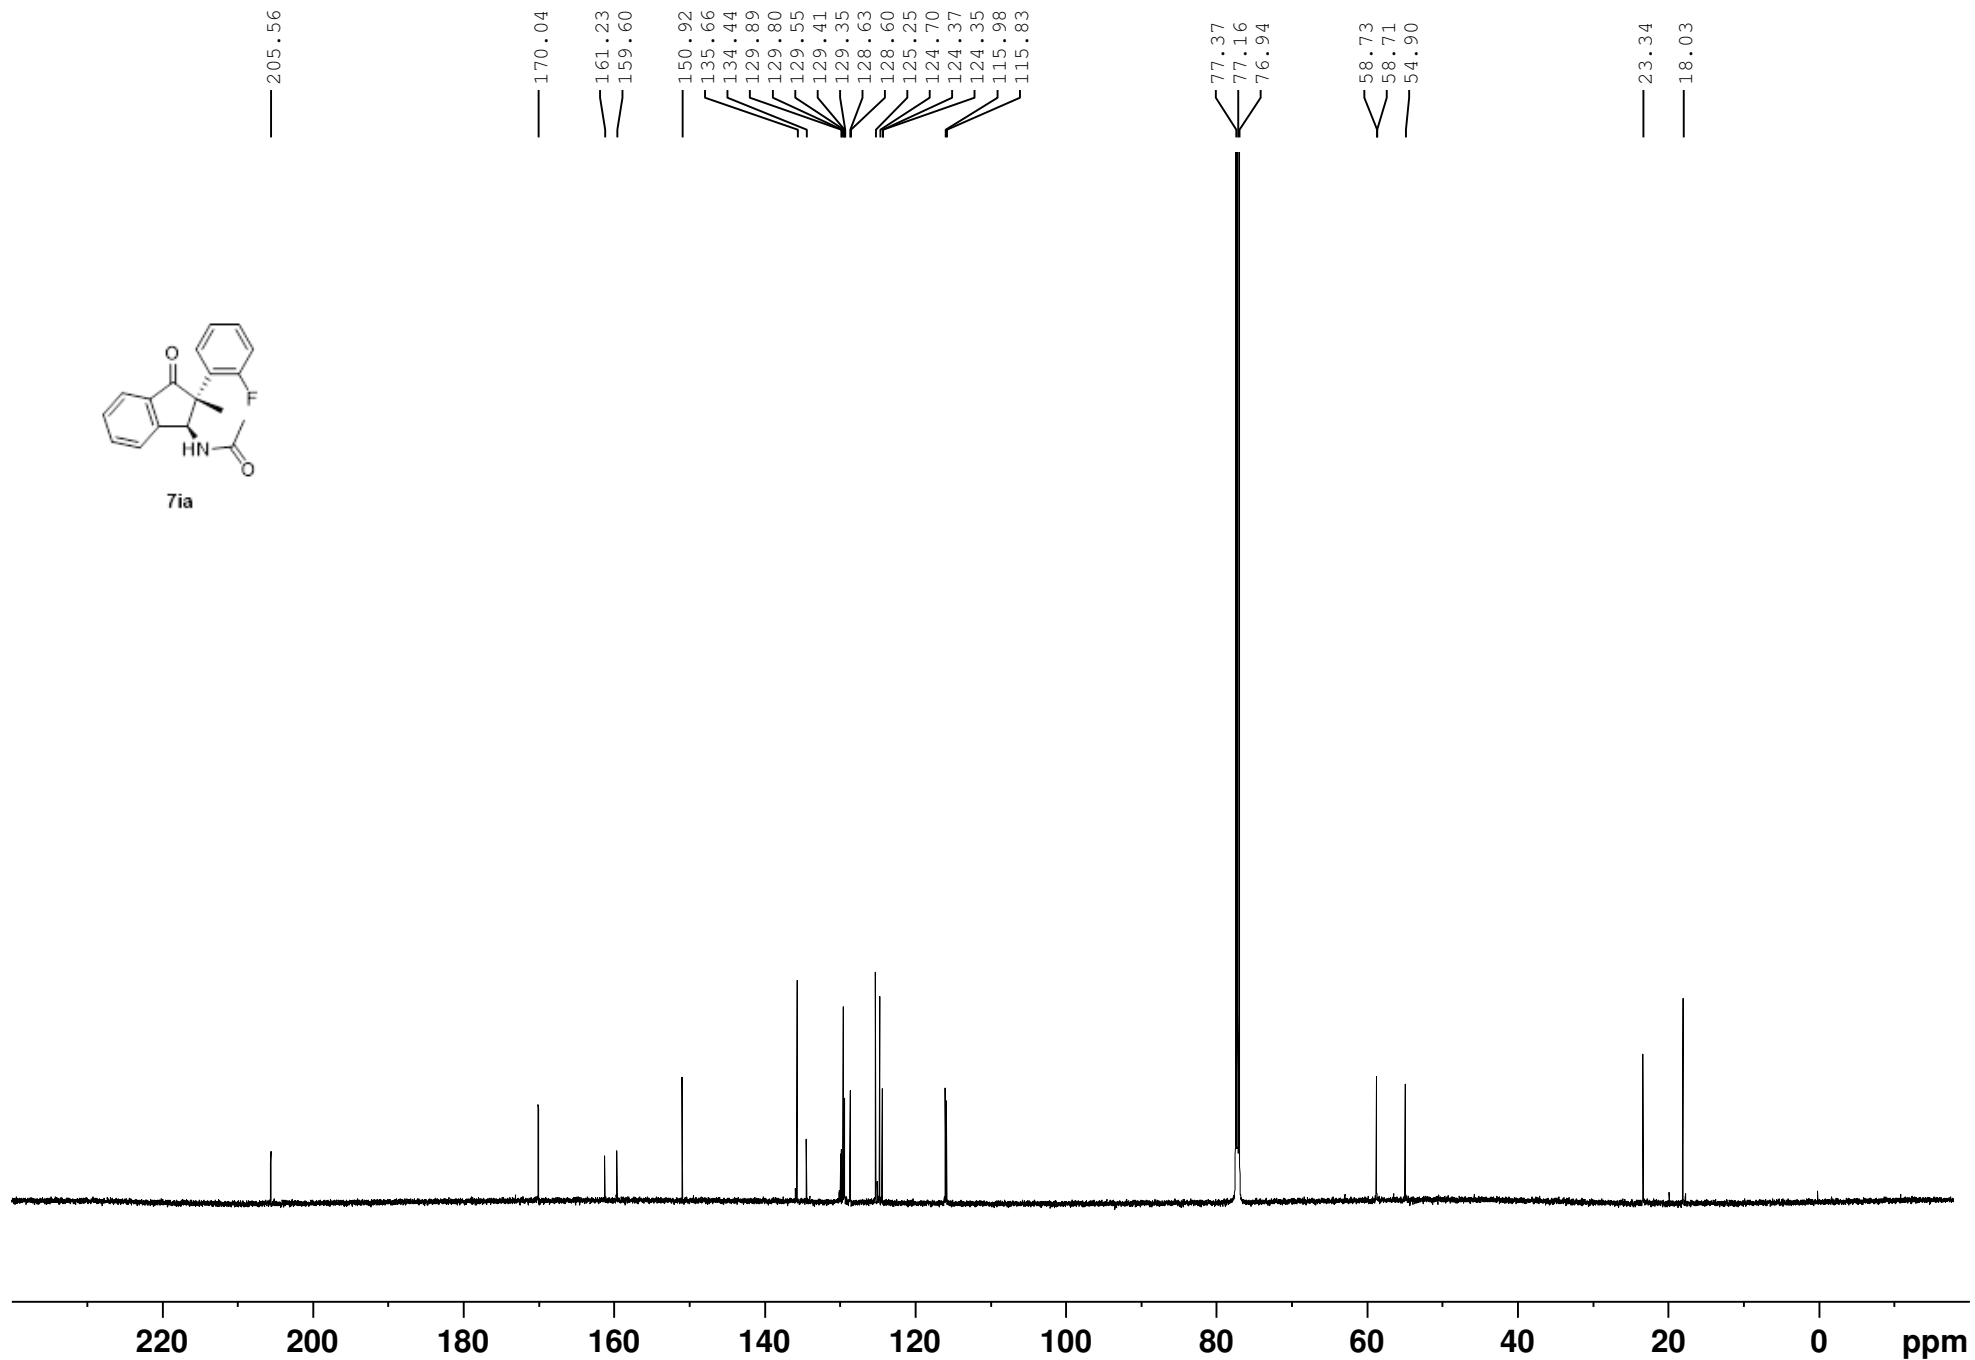

**$^{19}\text{F}$  NMR (376 MHz,  $\text{CDCl}_3$ )**

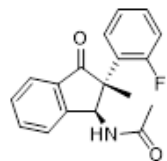

7ia

— -110.894

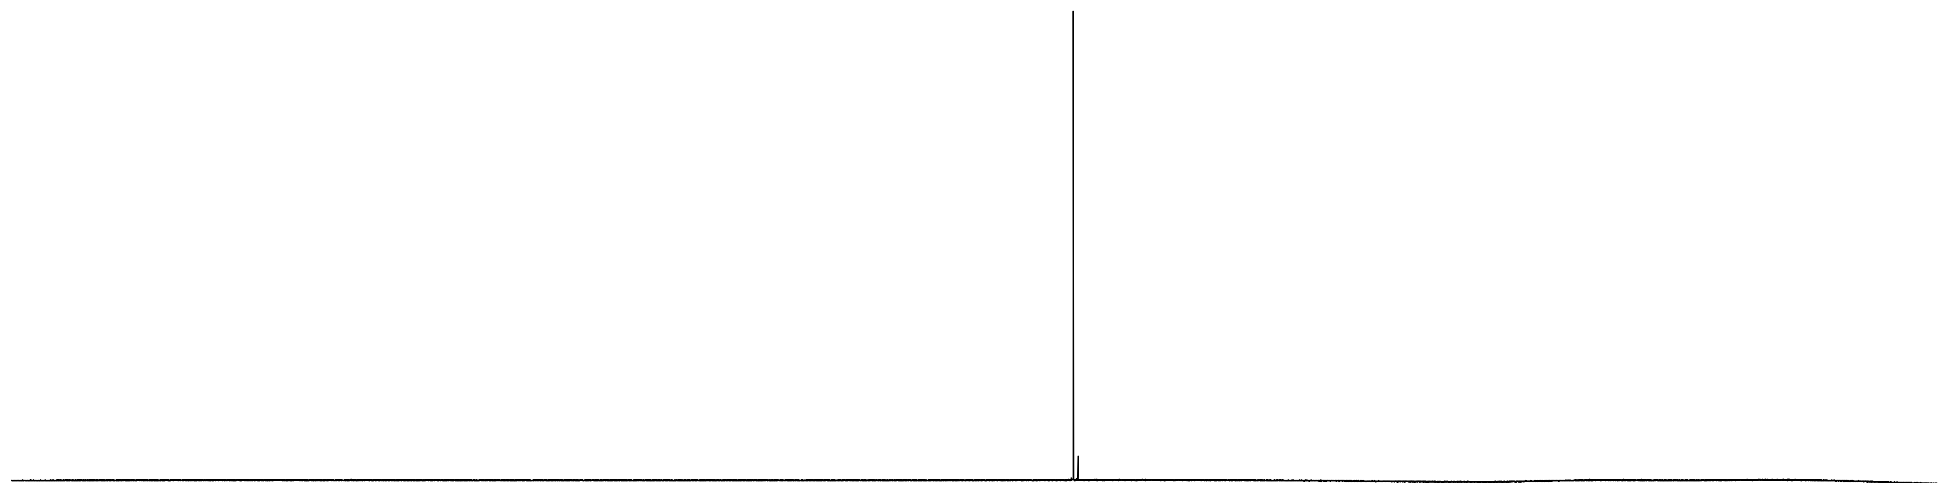

0

-20

-40

-60

-80

-100

-120

-140

-160

-180

-200

ppm

<sup>1</sup>H NMR (400 MHz, CDCl<sub>3</sub>)

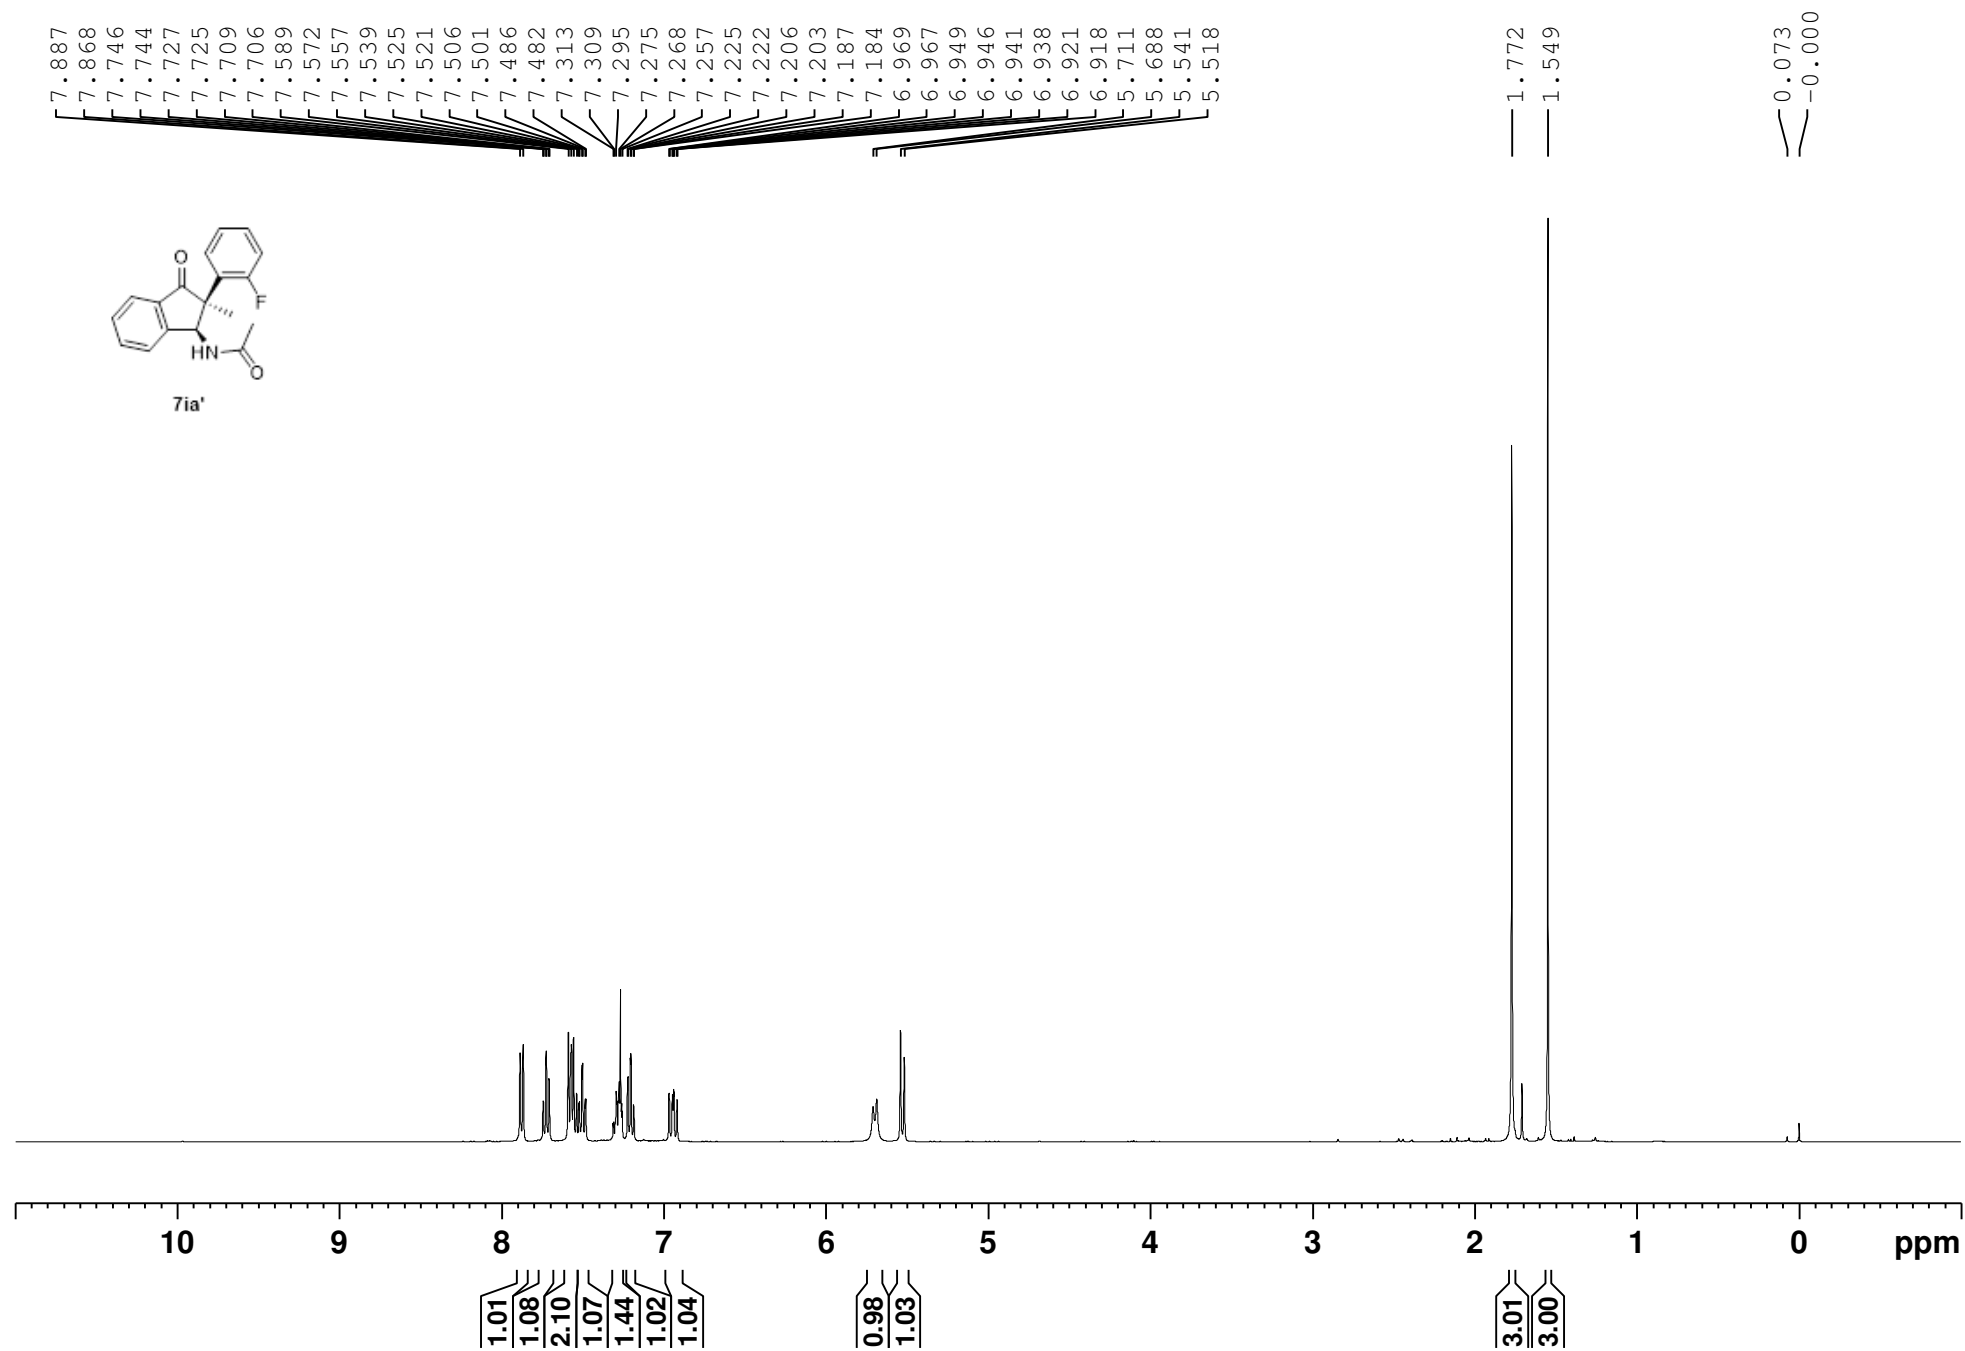

<sup>13</sup>C NMR (100 MHz, CDCl<sub>3</sub>)

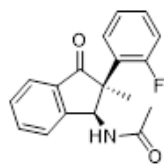

7ia'

206.62  
206.60

169.97

161.62  
159.21

150.19  
135.71  
135.25  
135.23  
130.36  
130.31  
129.83  
129.54  
129.46  
127.29  
127.14  
126.36  
124.74  
124.72  
114.92  
114.70

77.48  
77.16  
76.84

59.84  
55.98  
55.96

23.09  
22.49

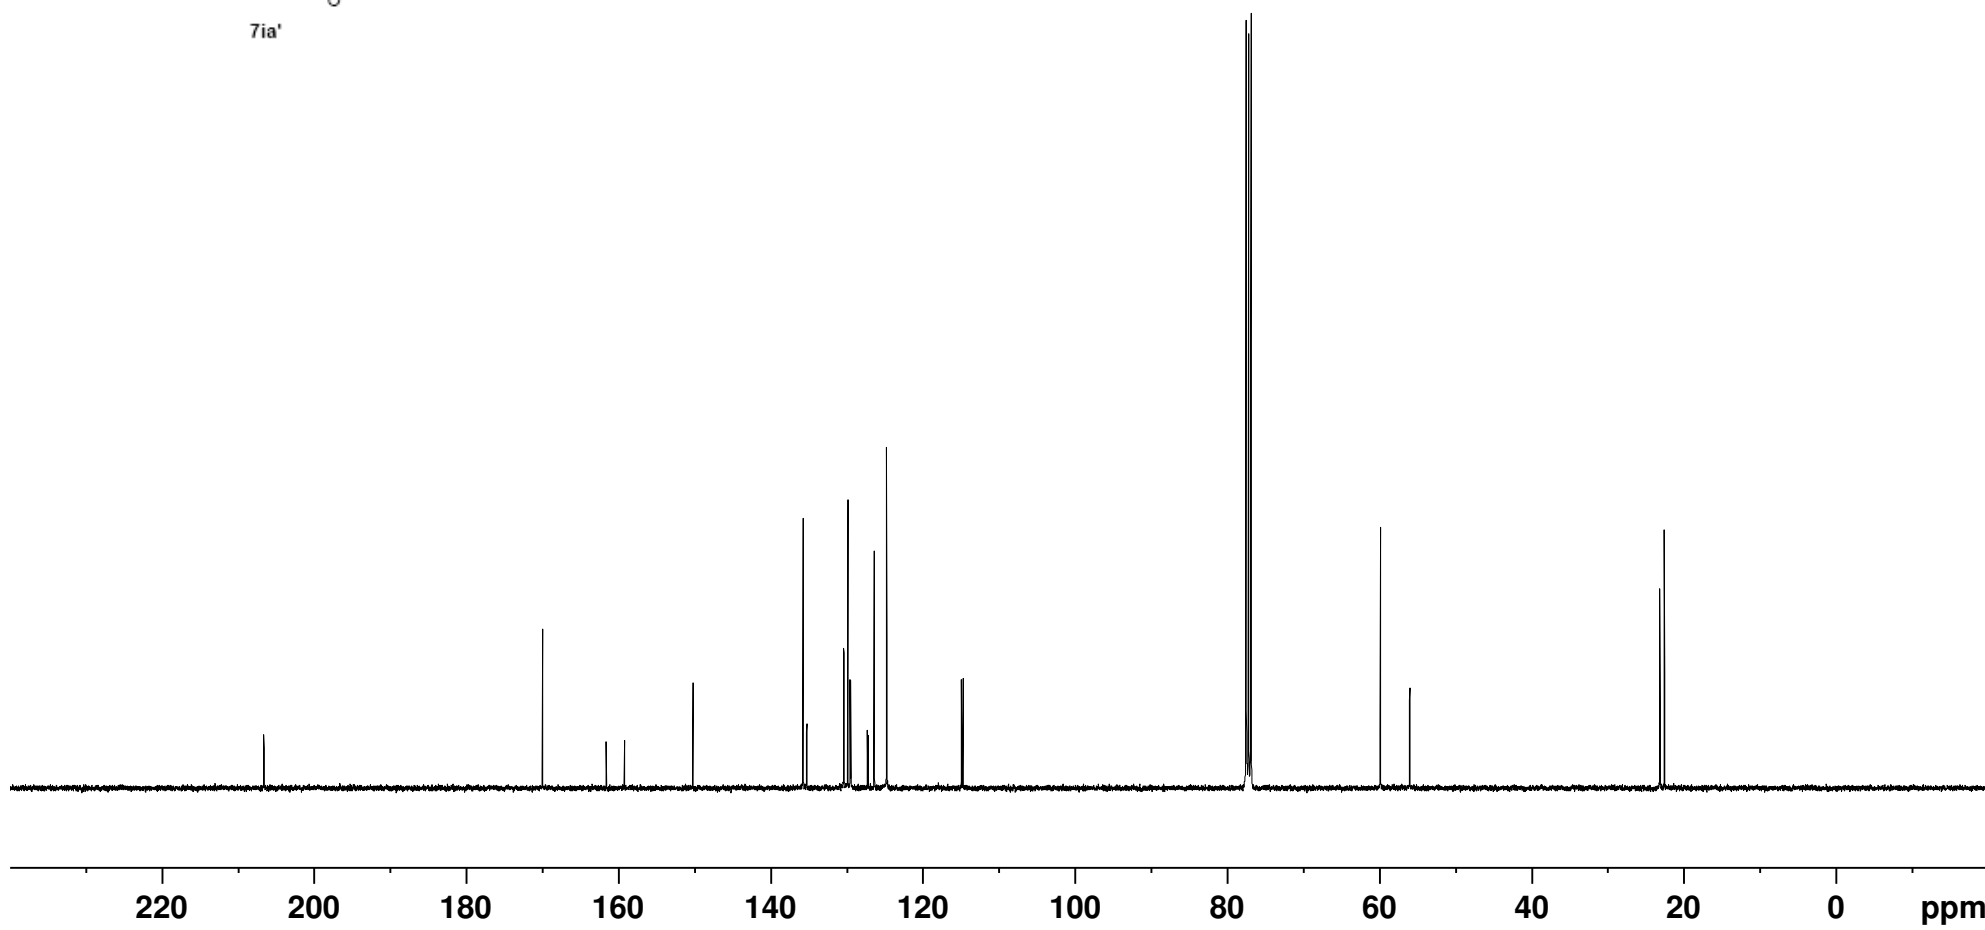



**$^{19}\text{F}$  NMR (376 MHz,  $\text{CDCl}_3$ )**

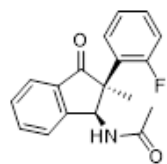

7ia'

— -105.586

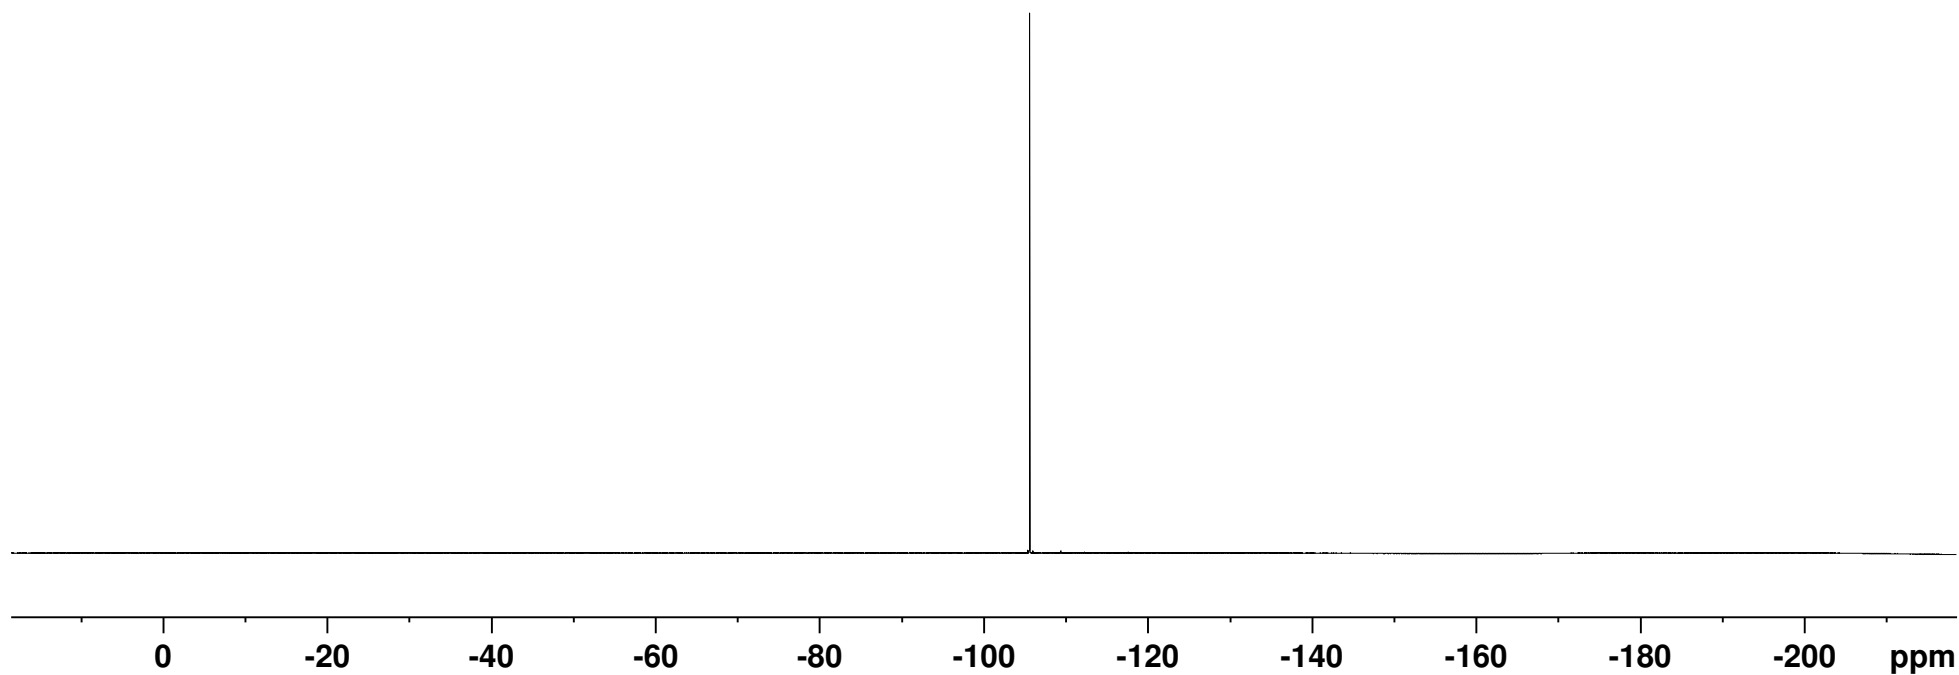

<sup>1</sup>H NMR (400 MHz, CDCl<sub>3</sub>)

7.872  
7.853  
7.760  
7.757  
7.739  
7.722  
7.719  
7.580  
7.574  
7.562  
7.561  
7.555  
7.536  
7.517  
7.511  
7.395  
7.374  
7.290  
7.284  
7.268  
7.264  
5.905  
5.882  
5.775  
5.752

— 2.134

— 1.460

< 0.070  
< -0.000

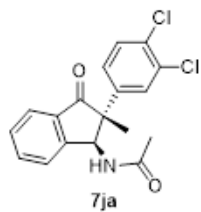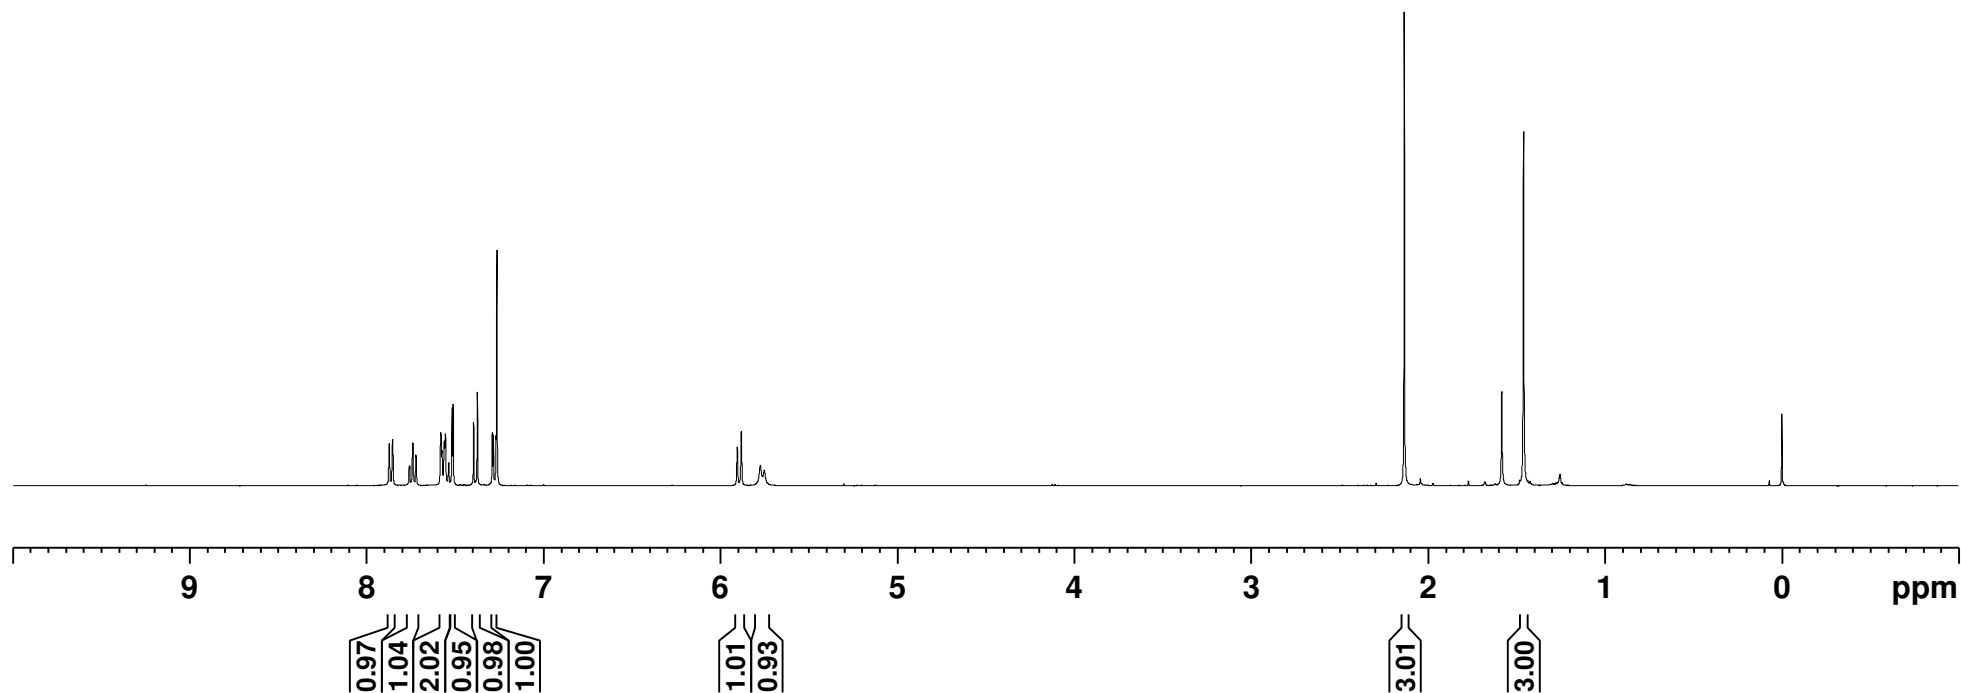

<sup>13</sup>C NMR (100 MHz, CDCl<sub>3</sub>)

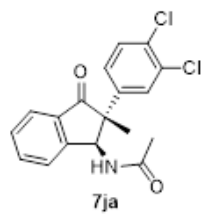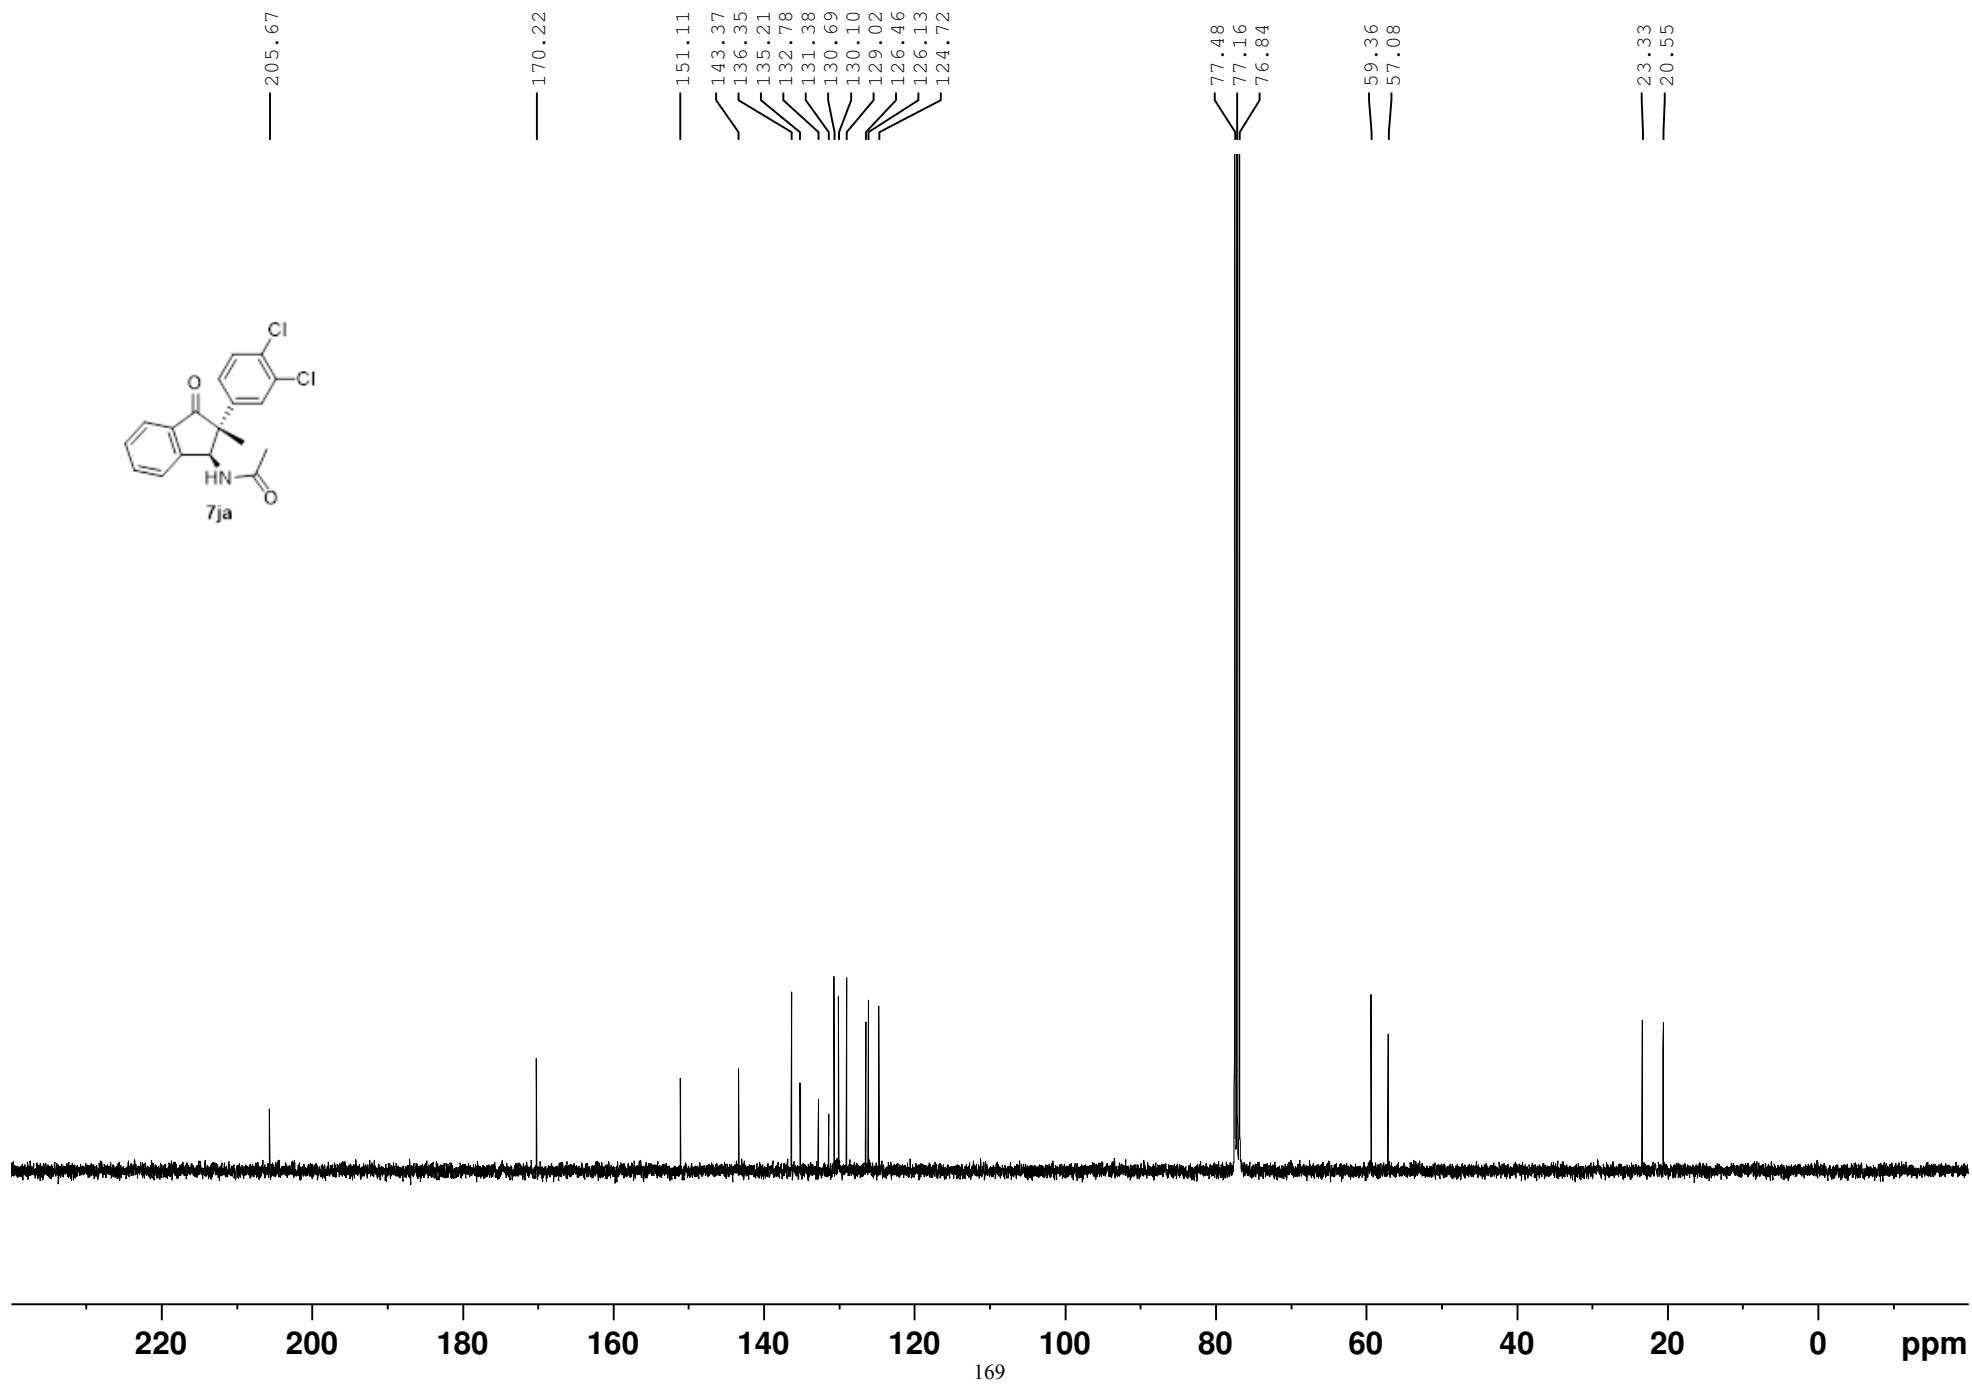

$^1\text{H}$  NMR (400 MHz,  $\text{CDCl}_3$ )

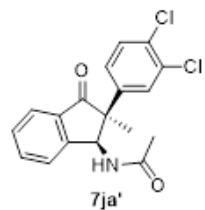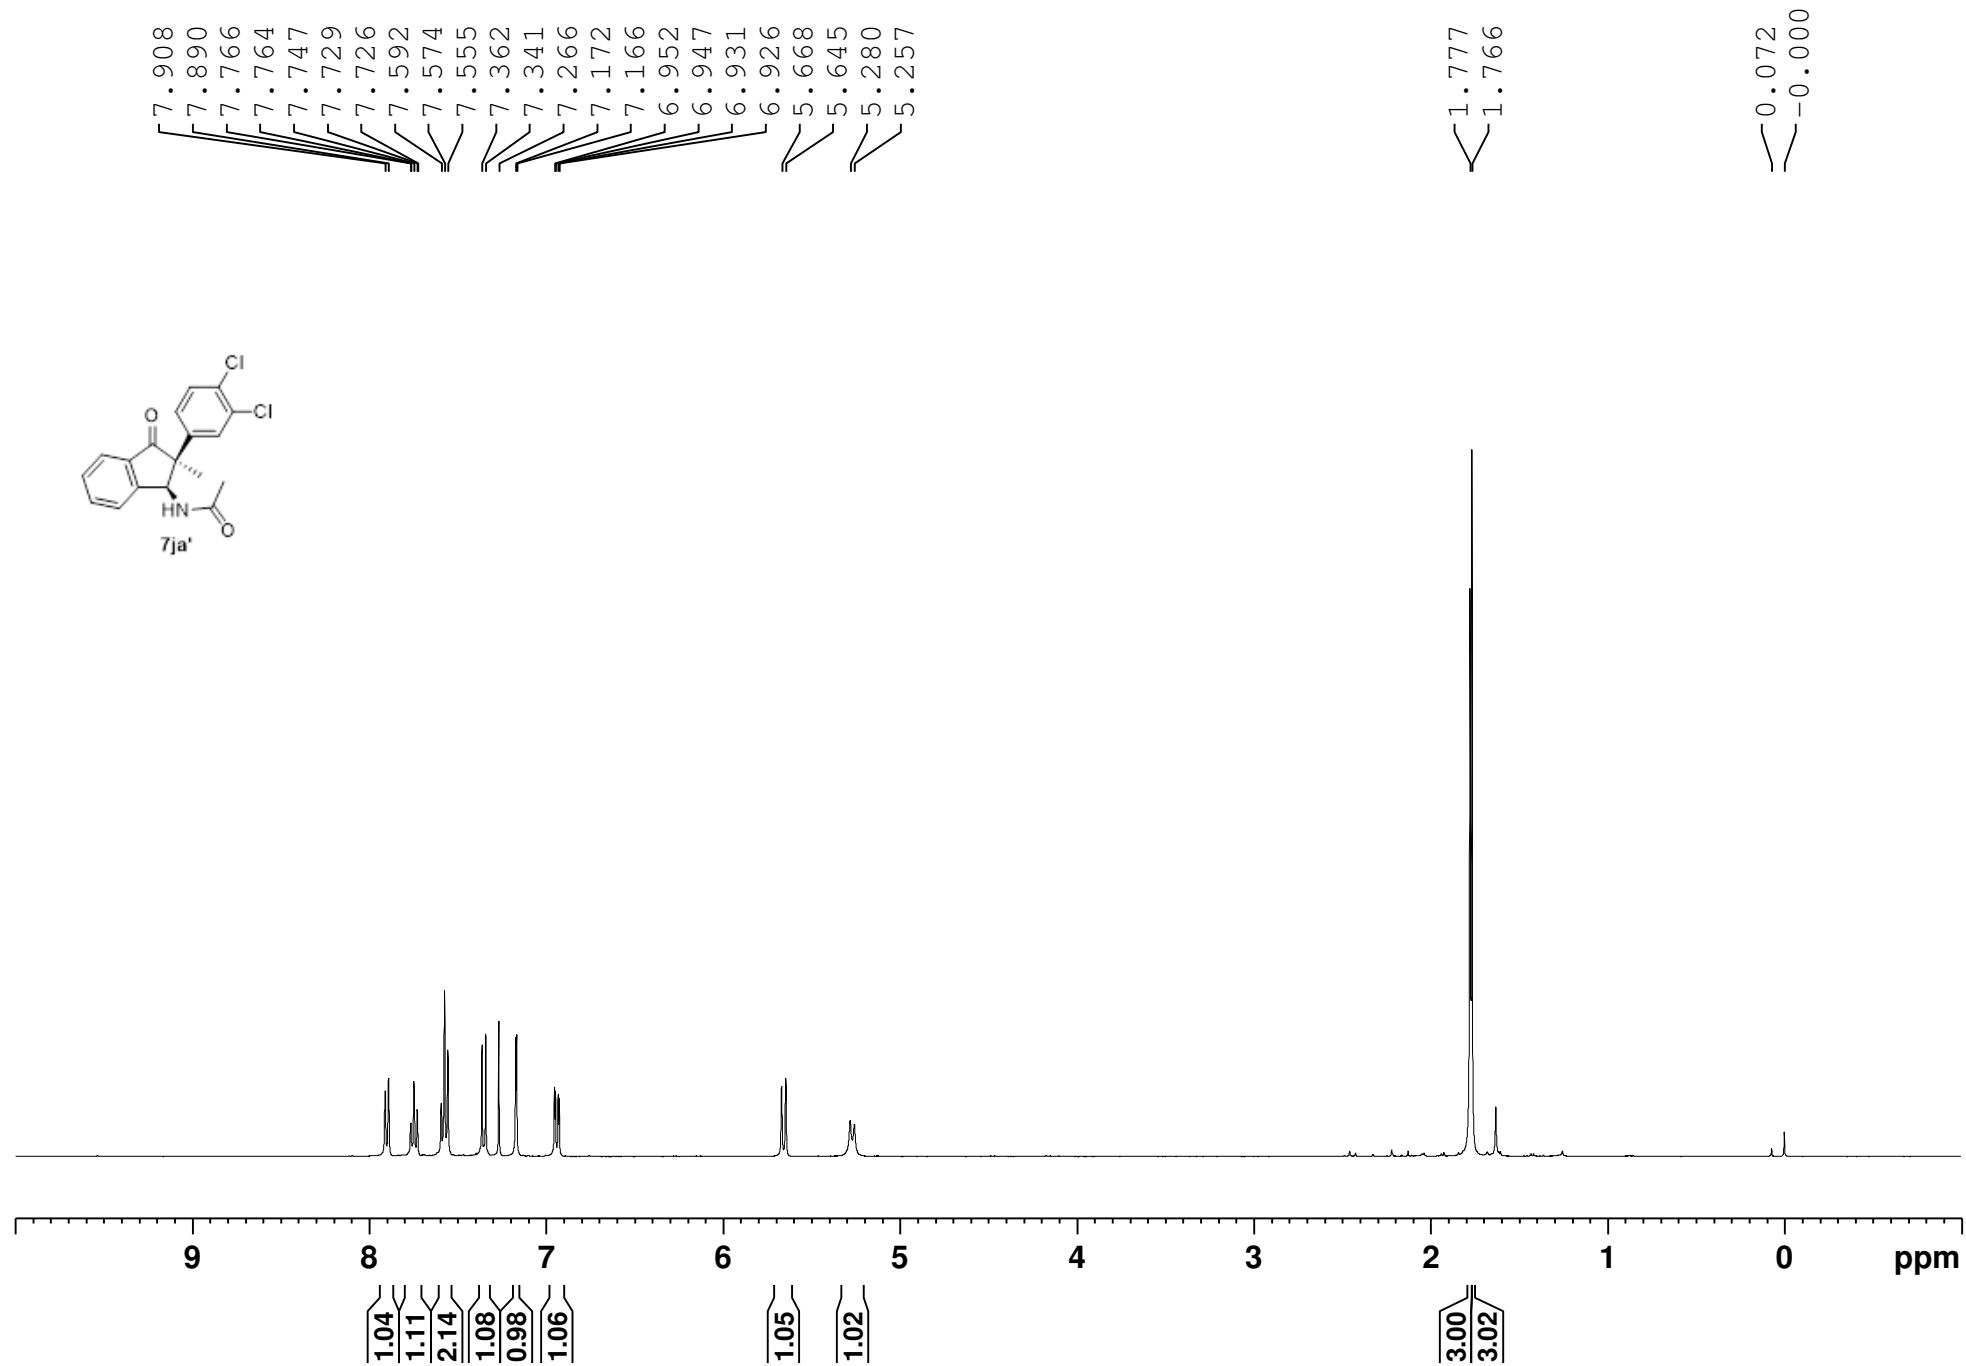

<sup>13</sup>C NMR (100 MHz, CDCl<sub>3</sub>)

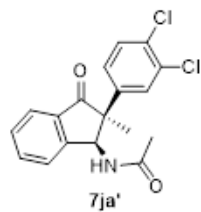

206.07

170.18

151.33

140.80  
136.45  
136.09  
132.71  
131.63  
130.35  
130.03  
129.86  
127.17  
126.20  
124.58

77.47  
77.16  
76.84

59.45  
58.34

23.46  
23.06

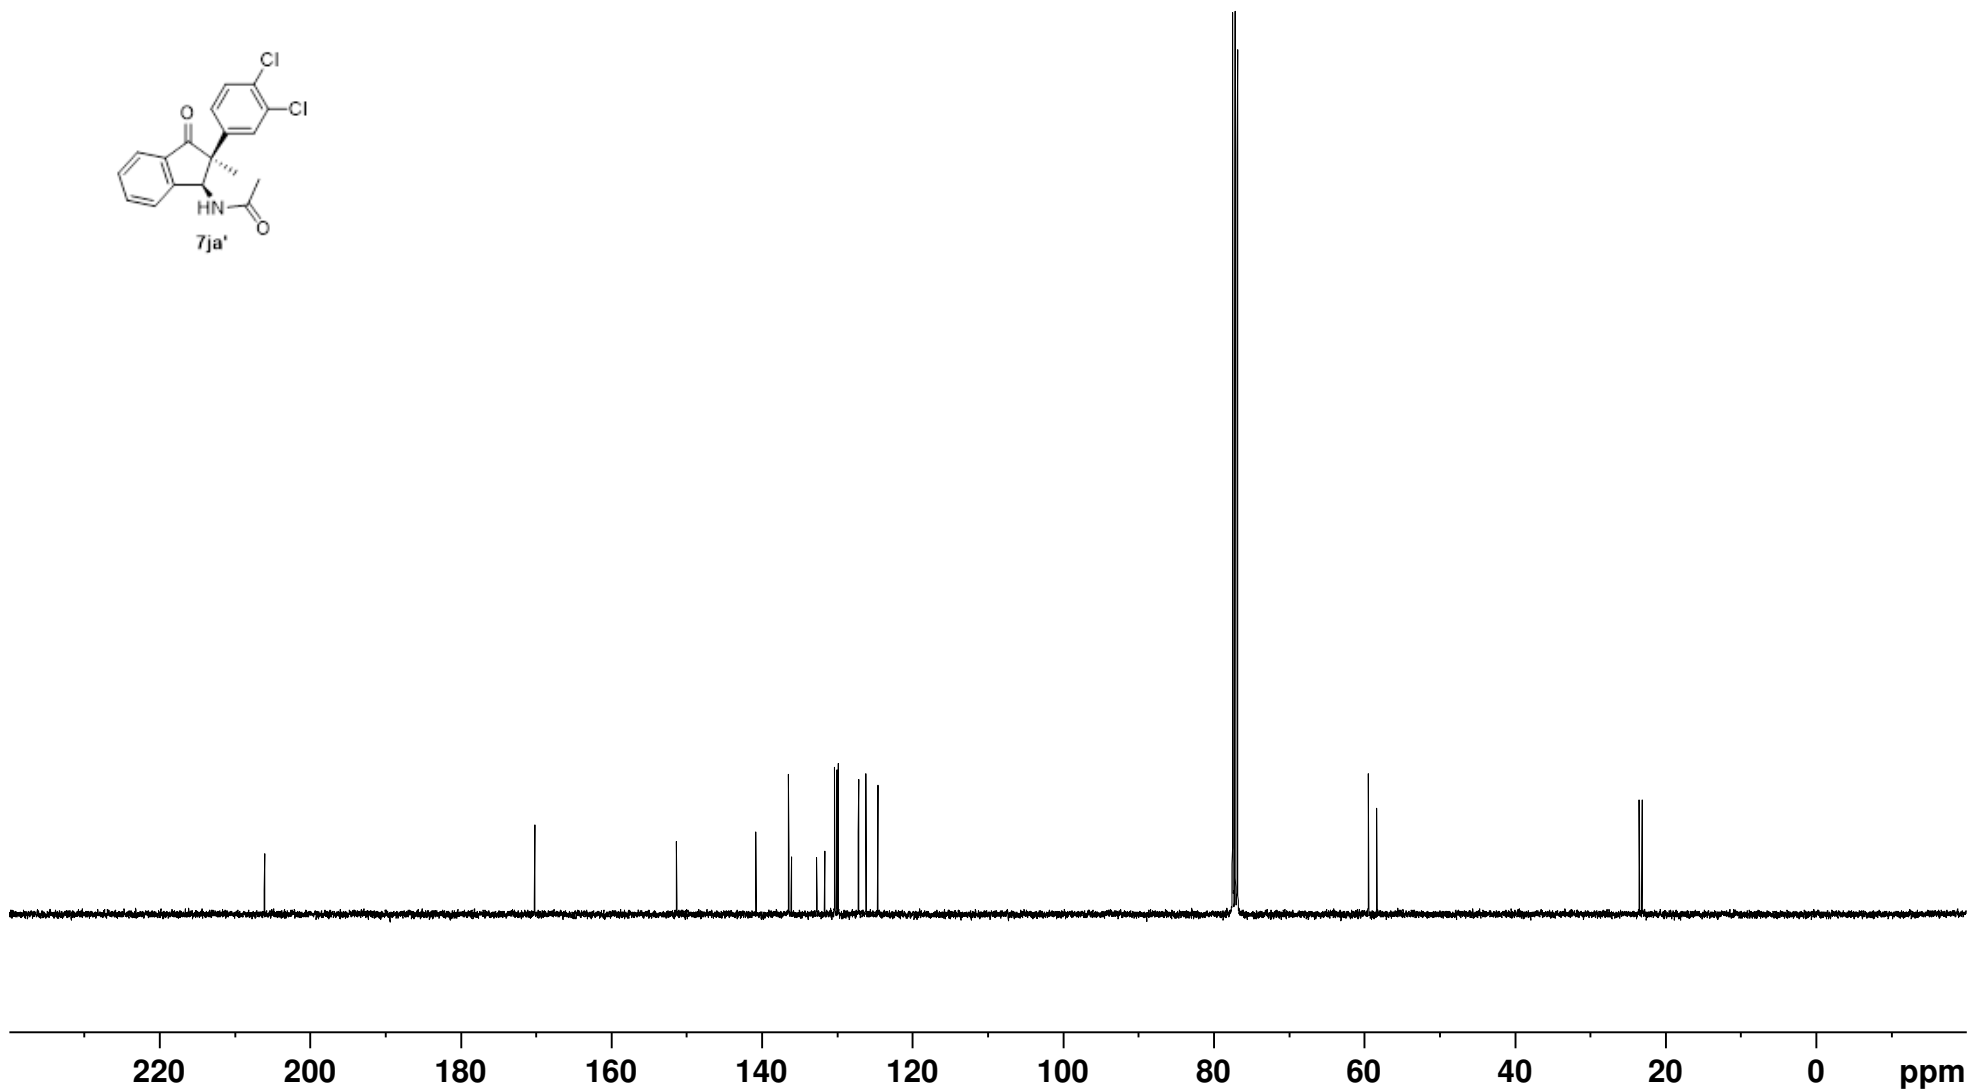

**<sup>1</sup>H NMR (400 MHz, CDCl<sub>3</sub>)**

7.720  
7.701  
7.378  
7.375  
7.370  
7.357  
7.355  
7.349  
7.329  
7.319  
7.309  
7.291  
7.271  
7.262  
7.226  
7.223  
7.220  
7.210  
7.205  
7.199  
7.190  
7.187  
7.184  
5.909  
5.886  
5.873  
5.849

— 2.455  
— 2.086  
— 1.471

0.072  
-0.000

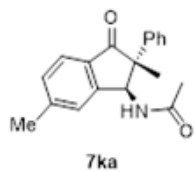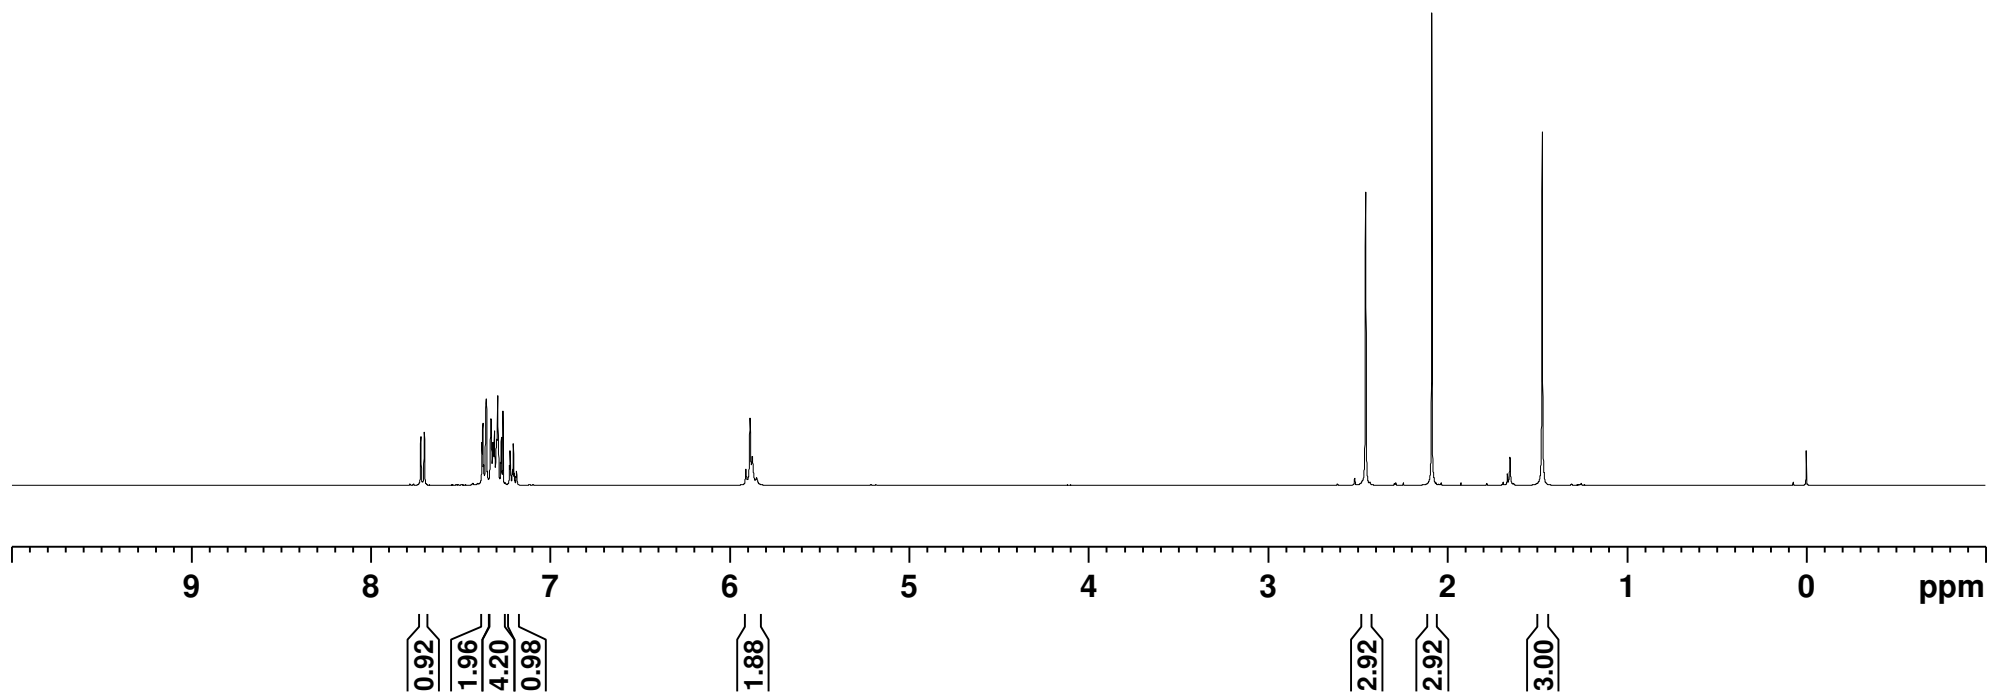

<sup>13</sup>C NMR (100 MHz, CDCl<sub>3</sub>)

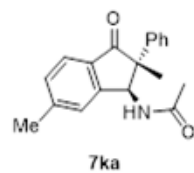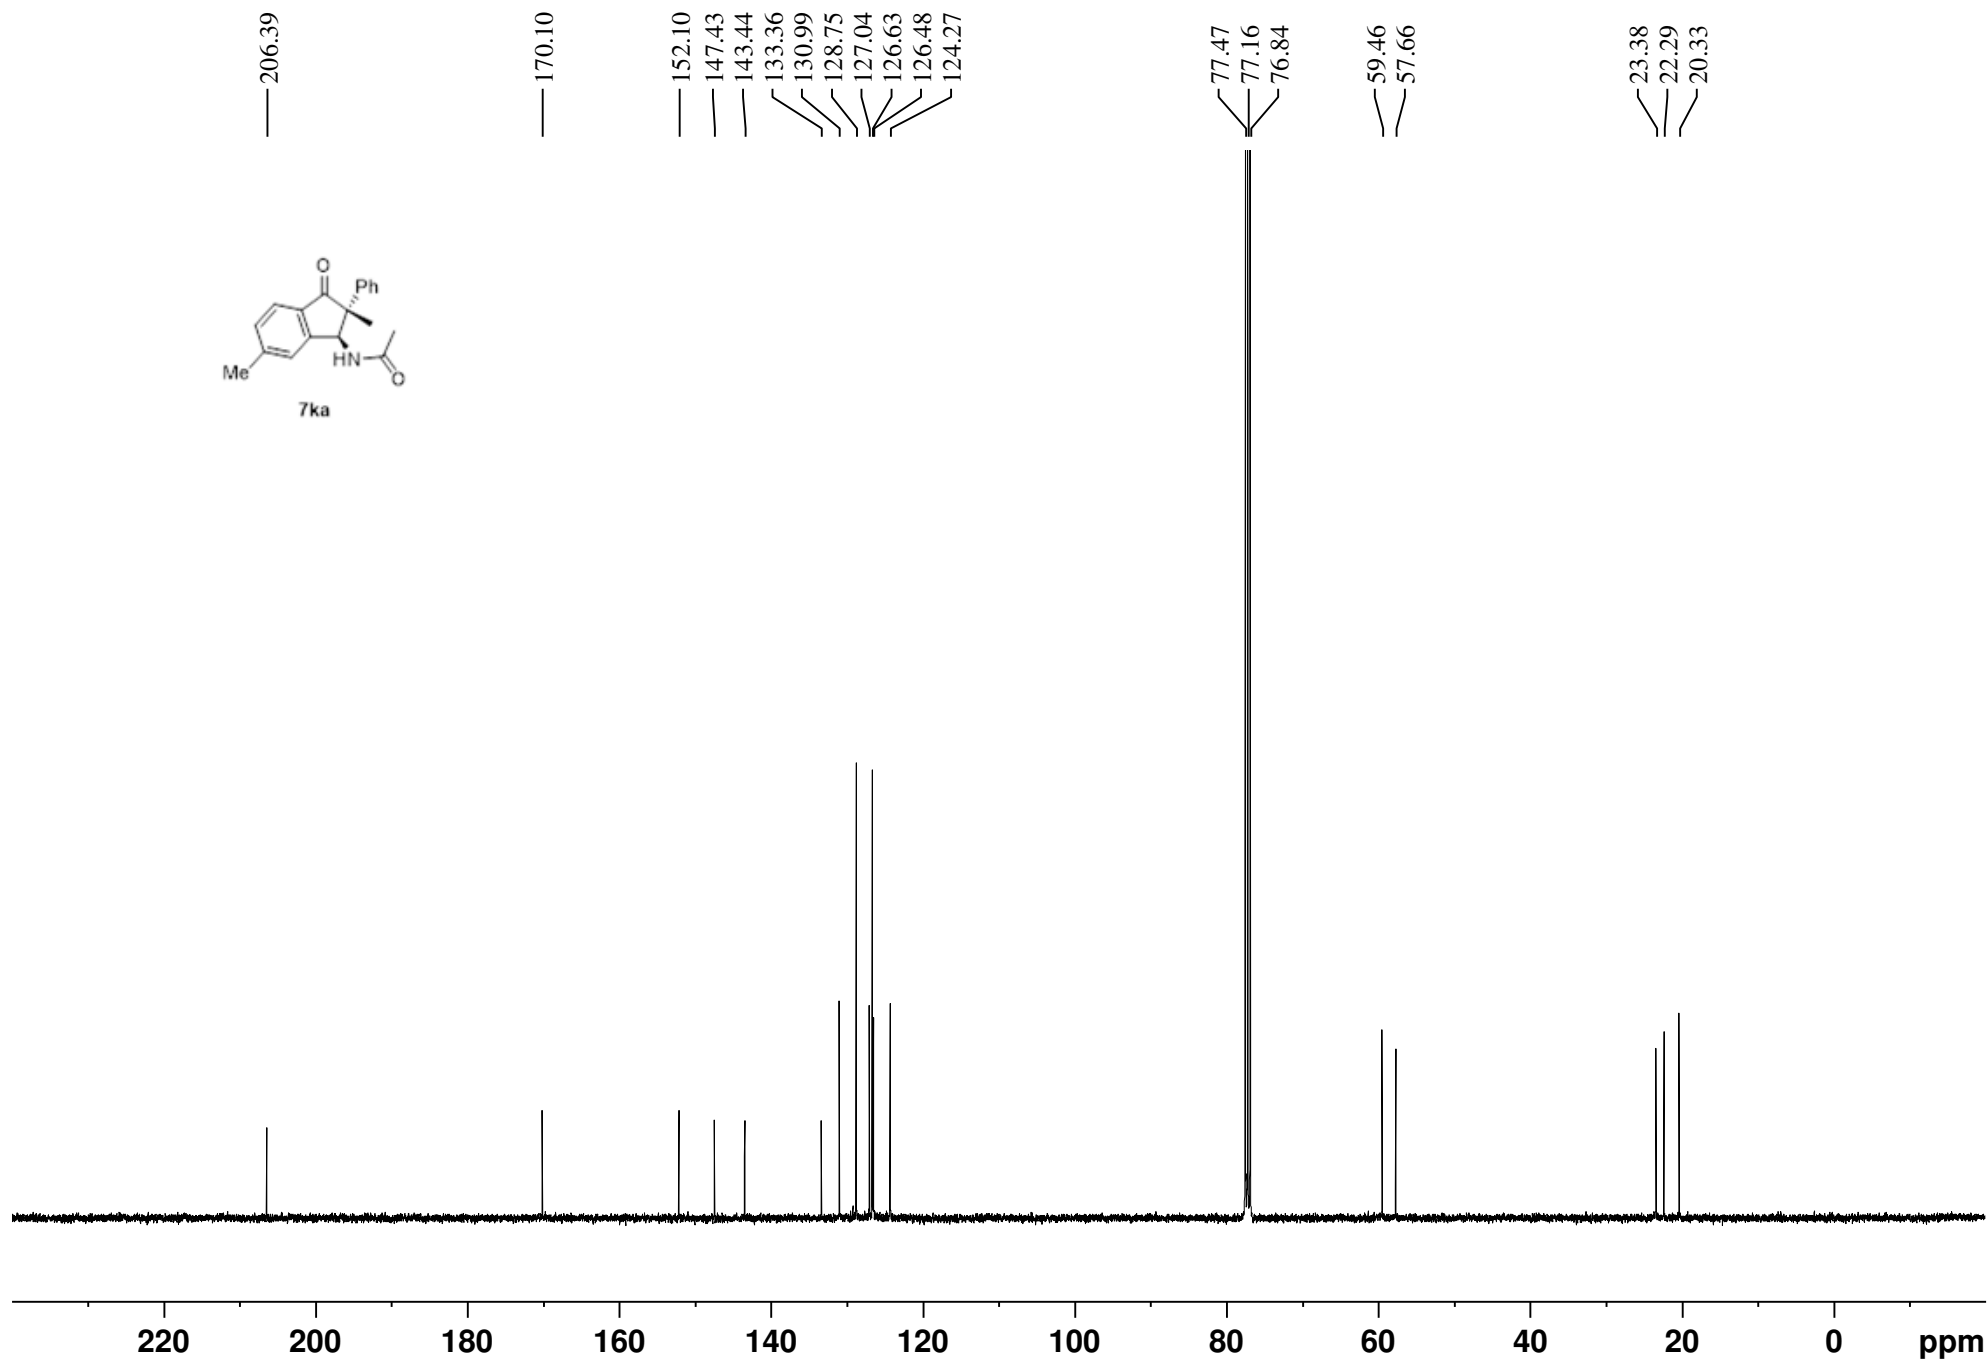

**<sup>1</sup>H NMR (400 MHz, CDCl<sub>3</sub>)**

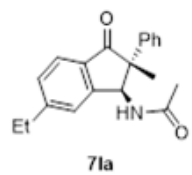

7.759  
7.738  
7.393  
7.390  
7.371  
7.352  
7.335  
7.315  
7.310  
7.297  
7.277  
7.262  
7.227  
7.209  
7.191  
5.932  
5.908  
5.827  
5.804

2.778  
2.759  
2.740  
2.721  
2.106  
1.481  
1.295  
1.276  
1.257

— -0.000

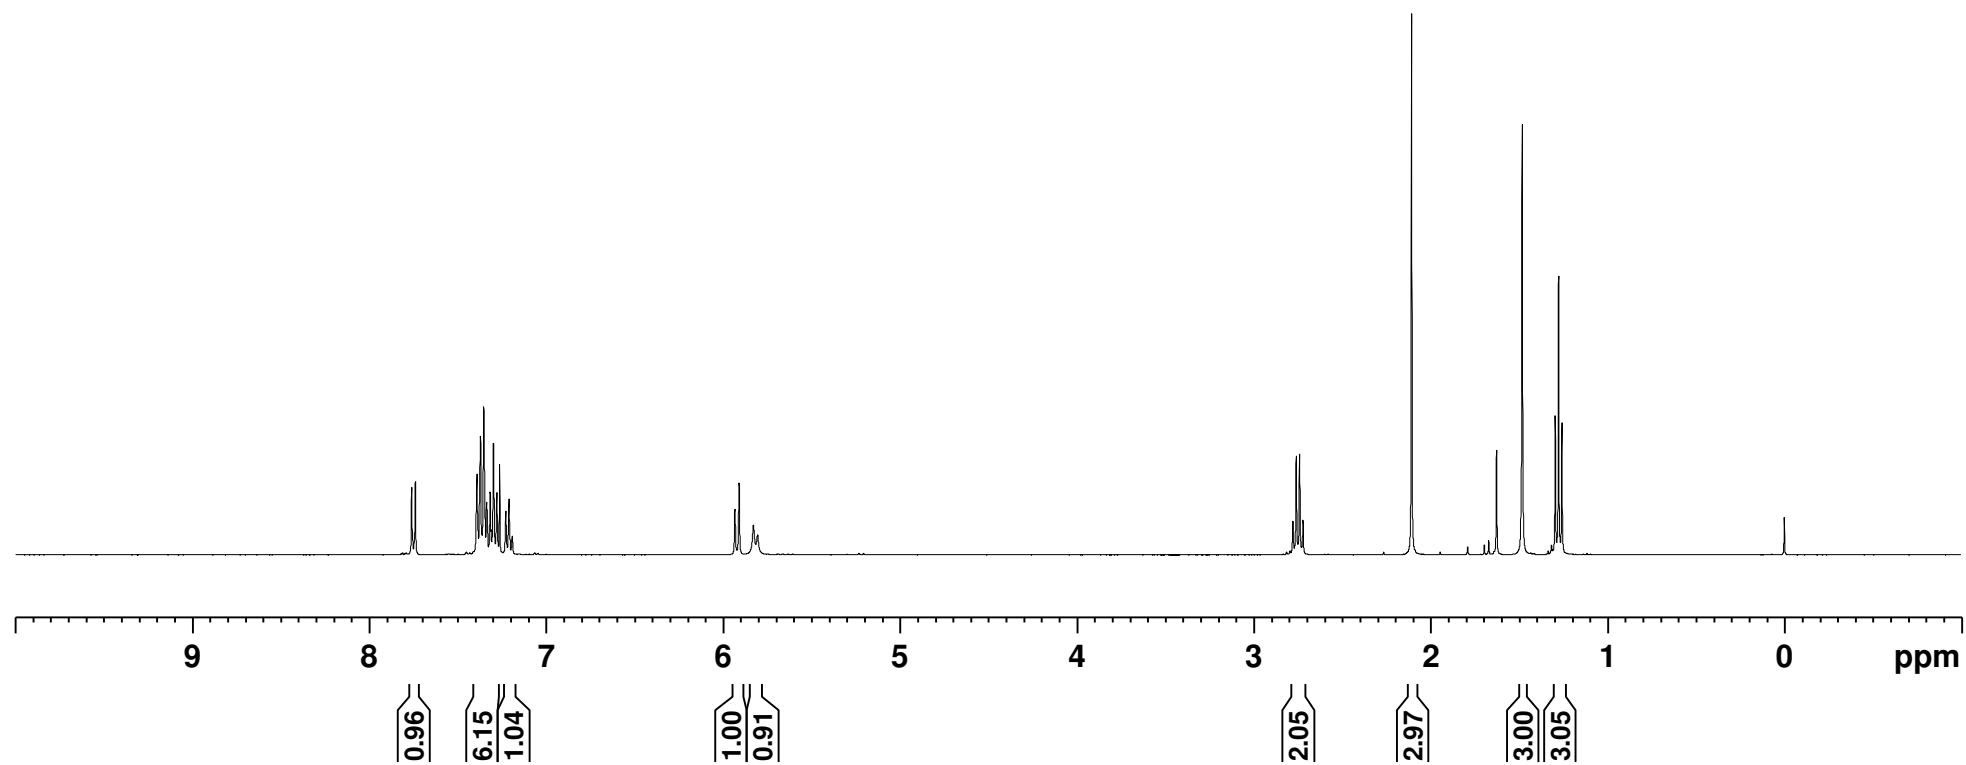



<sup>13</sup>C NMR (100 MHz, CDCl<sub>3</sub>)

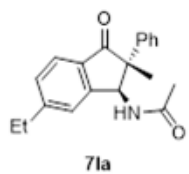

— 206.57

— 170.22

— 153.58

— 152.19

— 143.50

— 133.51

— 129.83

— 128.68

— 126.97

— 126.58

— 125.26

— 124.26

— 77.48

— 77.16

— 76.84

— 59.49

— 57.68

— 29.53

— 23.22

— 20.23

— 15.35

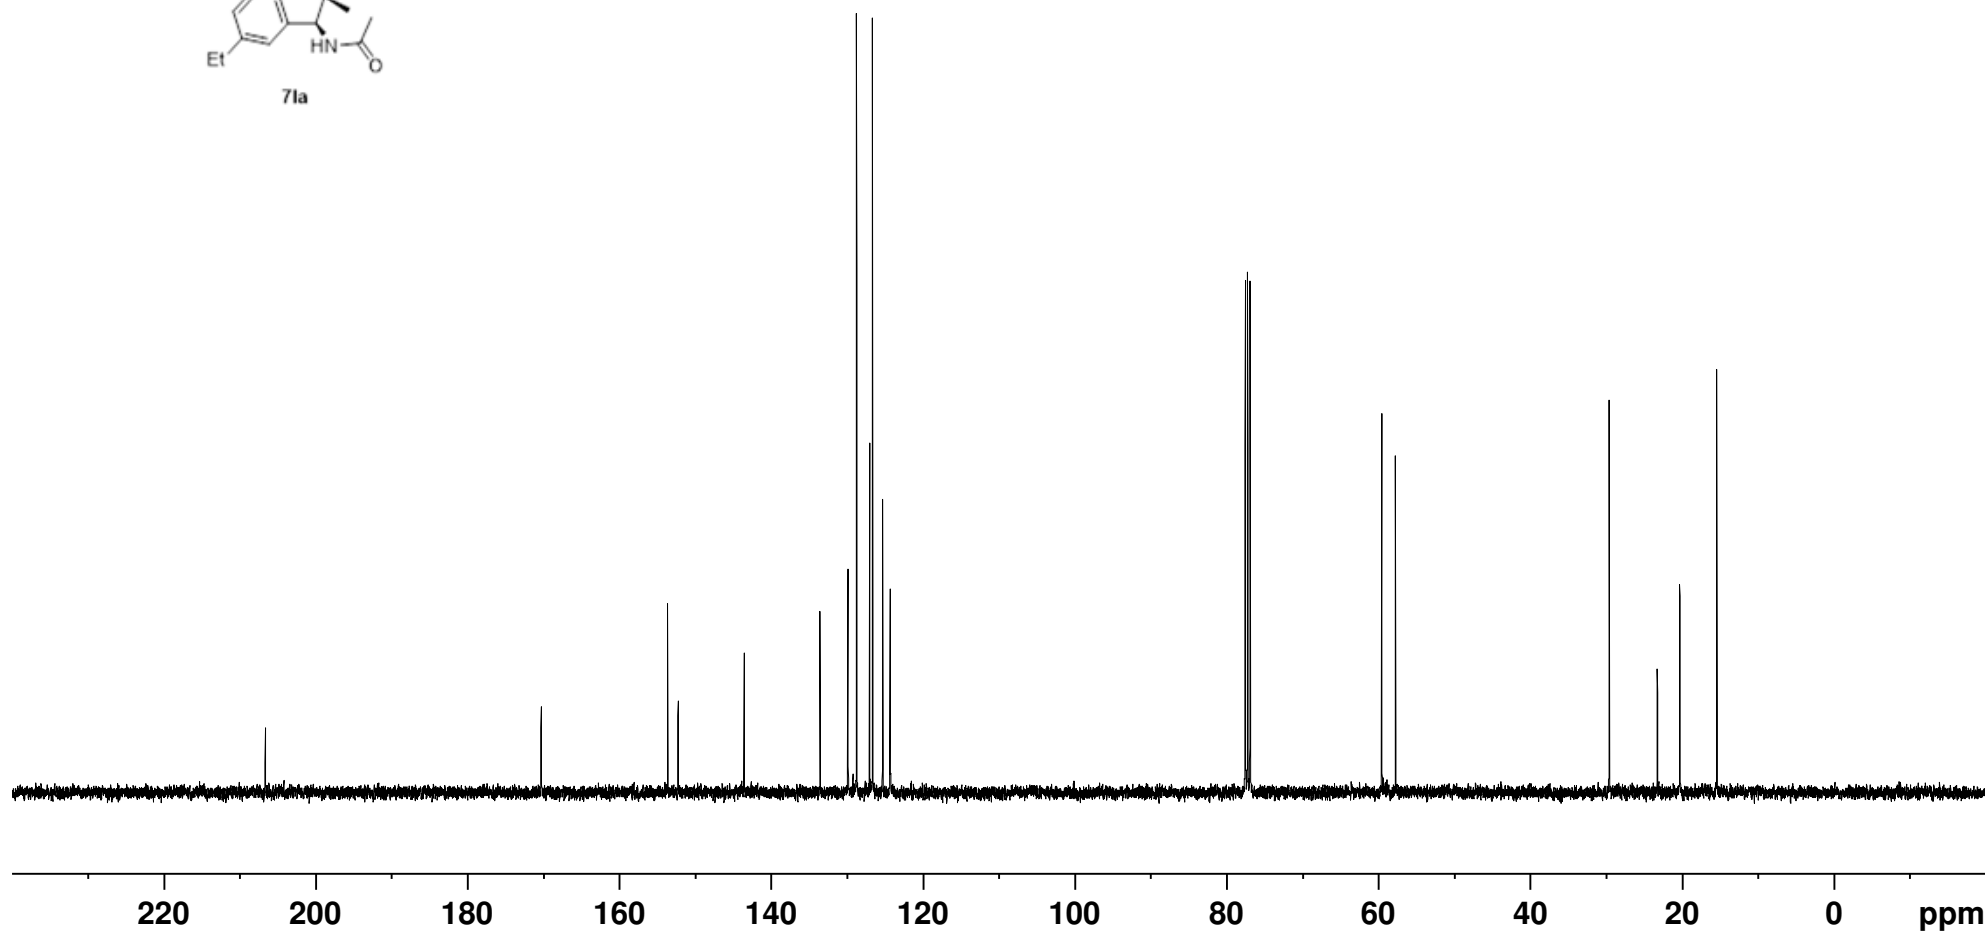

$^1\text{H}$  NMR (400 MHz,  $\text{CDCl}_3$ )

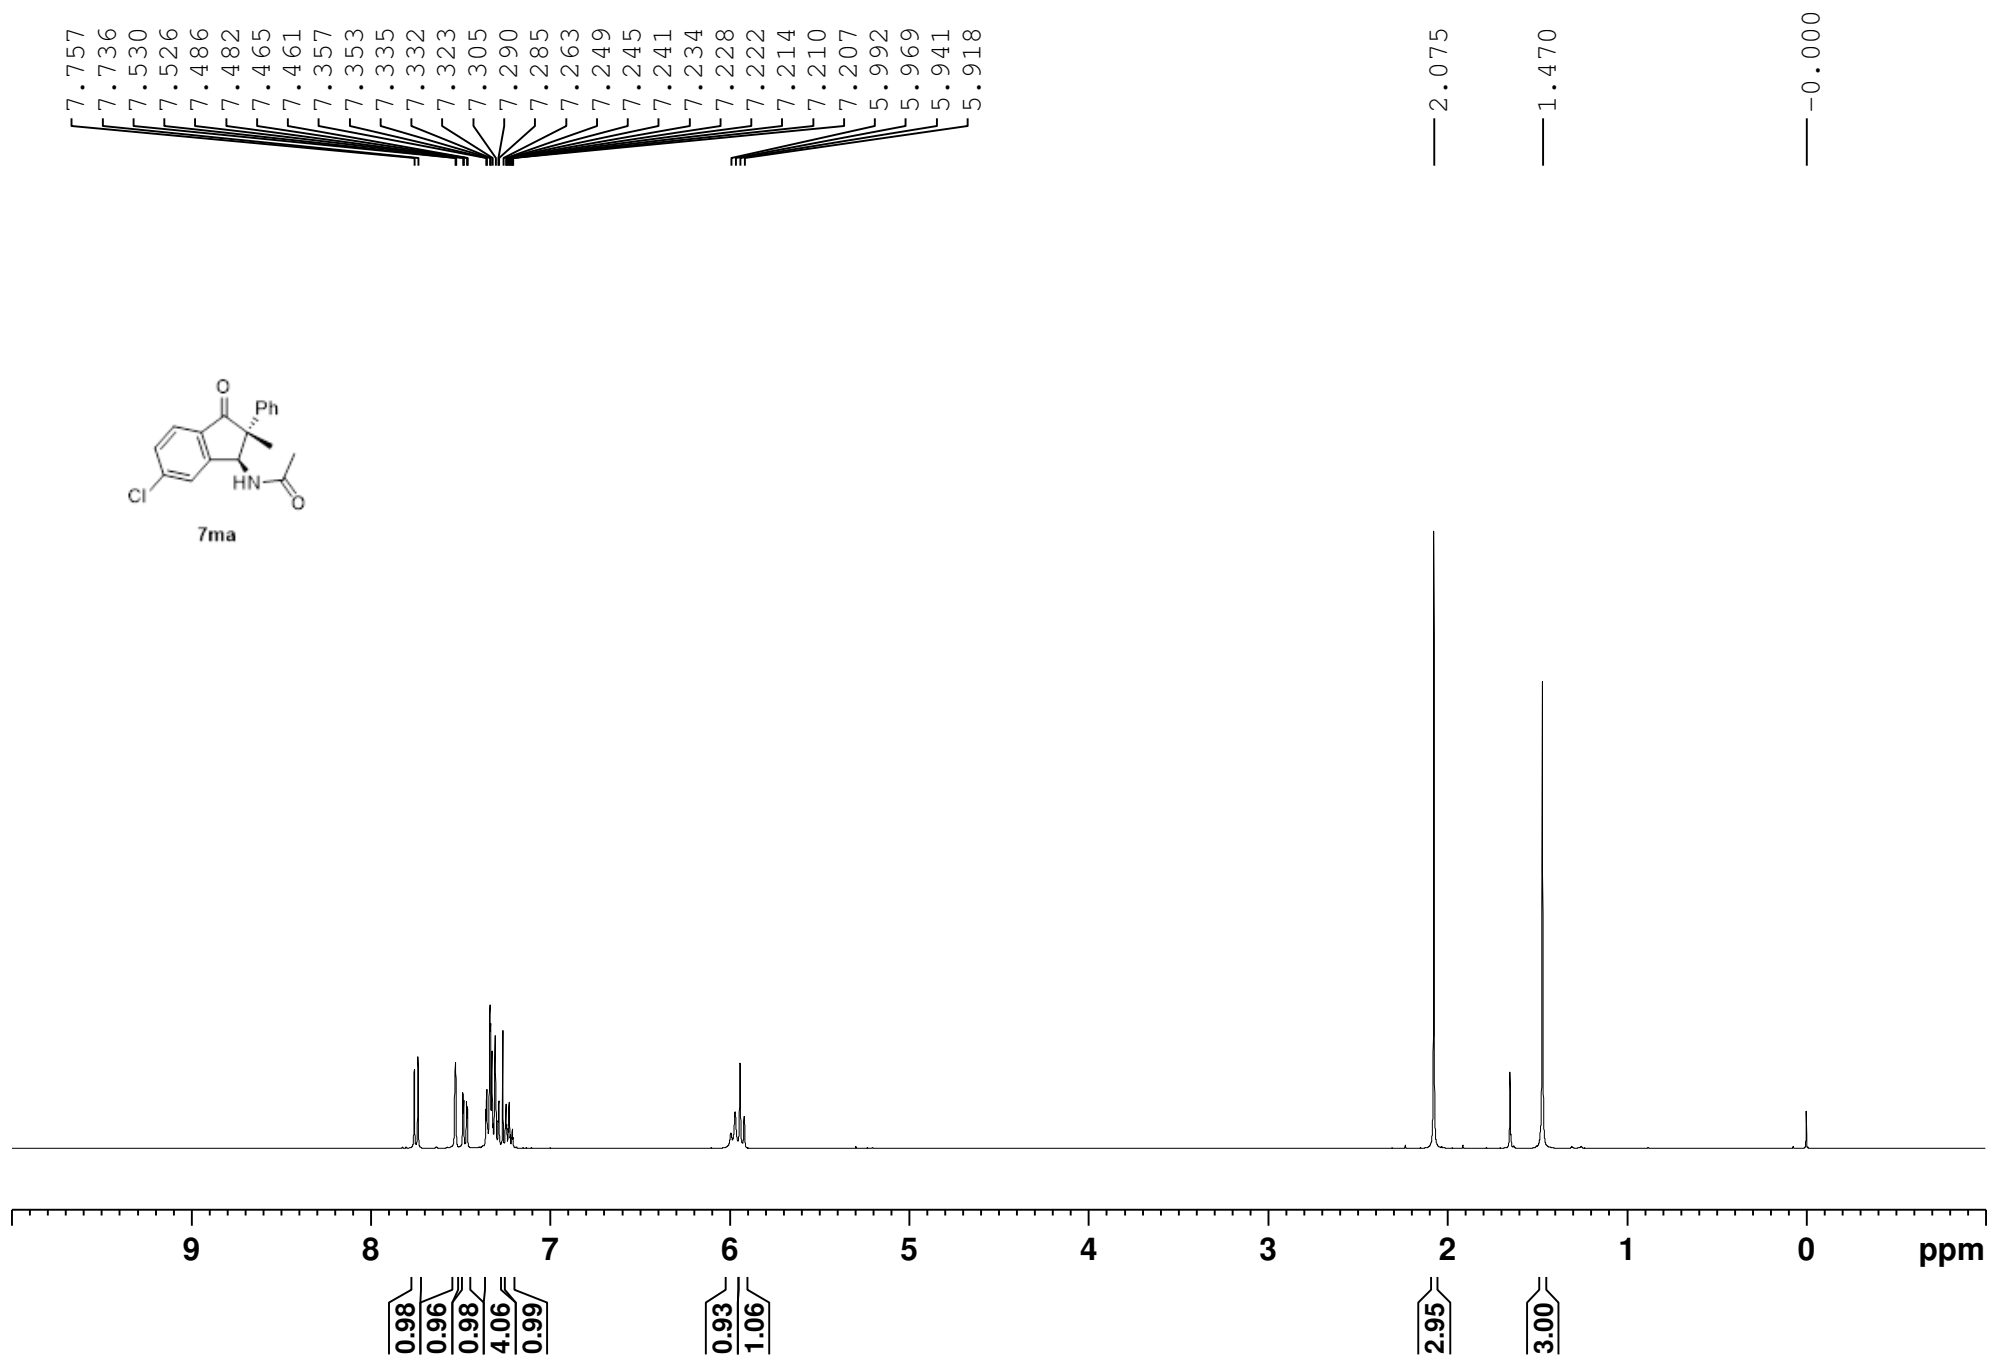

<sup>13</sup>C NMR (100 MHz, CDCl<sub>3</sub>)

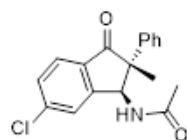

7ma

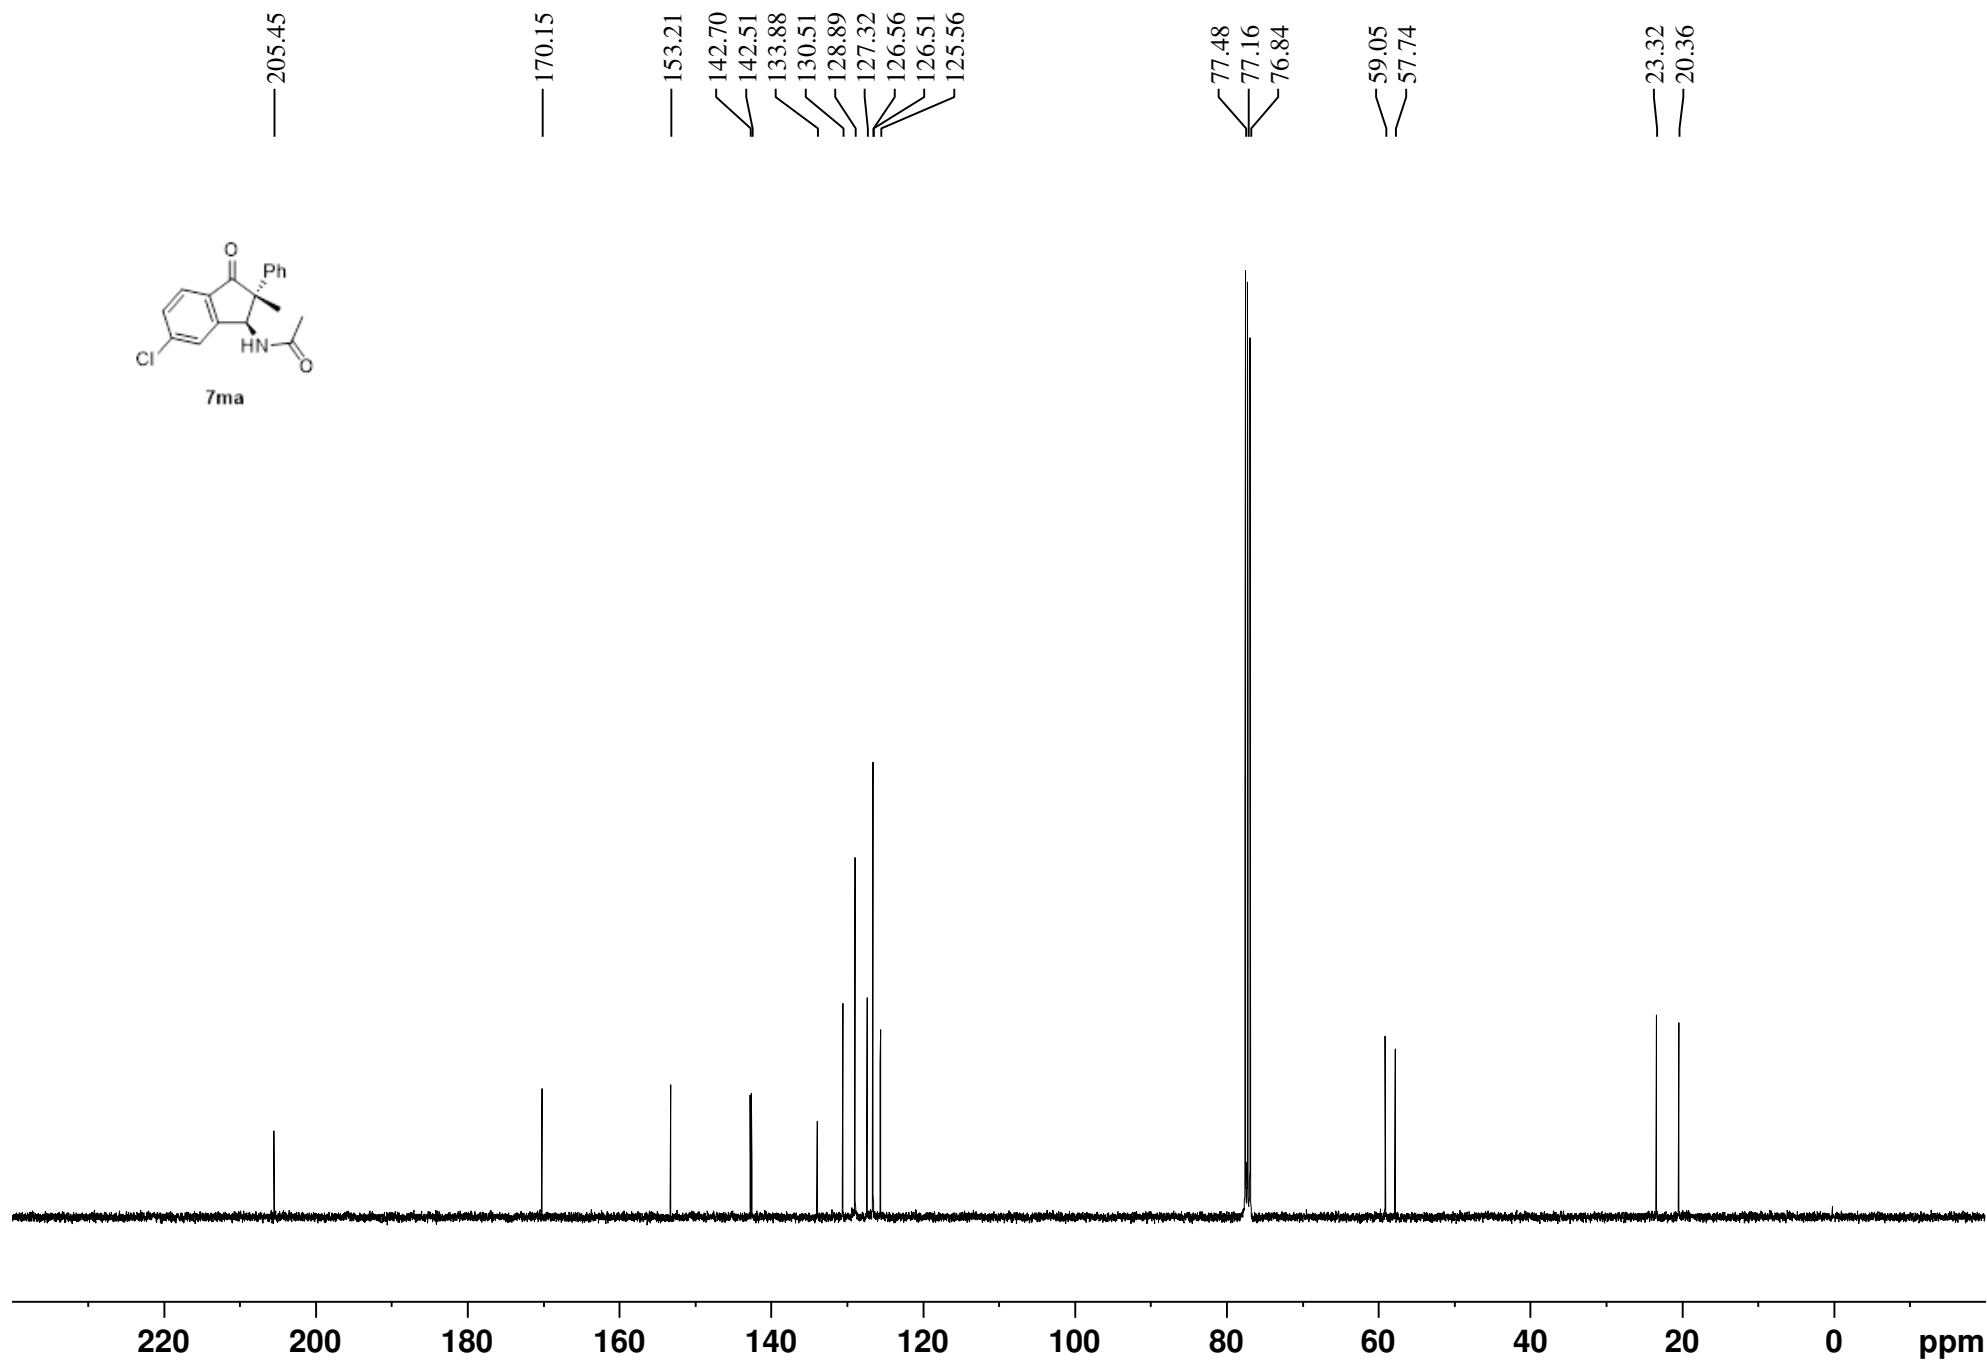

**$^1\text{H}$  NMR (400 MHz,  $\text{CDCl}_3$ )**

7.711  
7.710  
7.693  
7.672  
7.653  
7.649  
7.632  
7.629  
7.361  
7.357  
7.339  
7.326  
7.308  
7.304  
7.292  
7.288  
7.263  
7.251  
7.247  
7.243  
7.235  
7.230  
7.224  
7.216  
7.212  
7.208  
5.964  
5.941  
5.931  
5.907

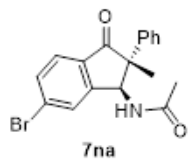

— 2.090

— 1.475

— -0.000

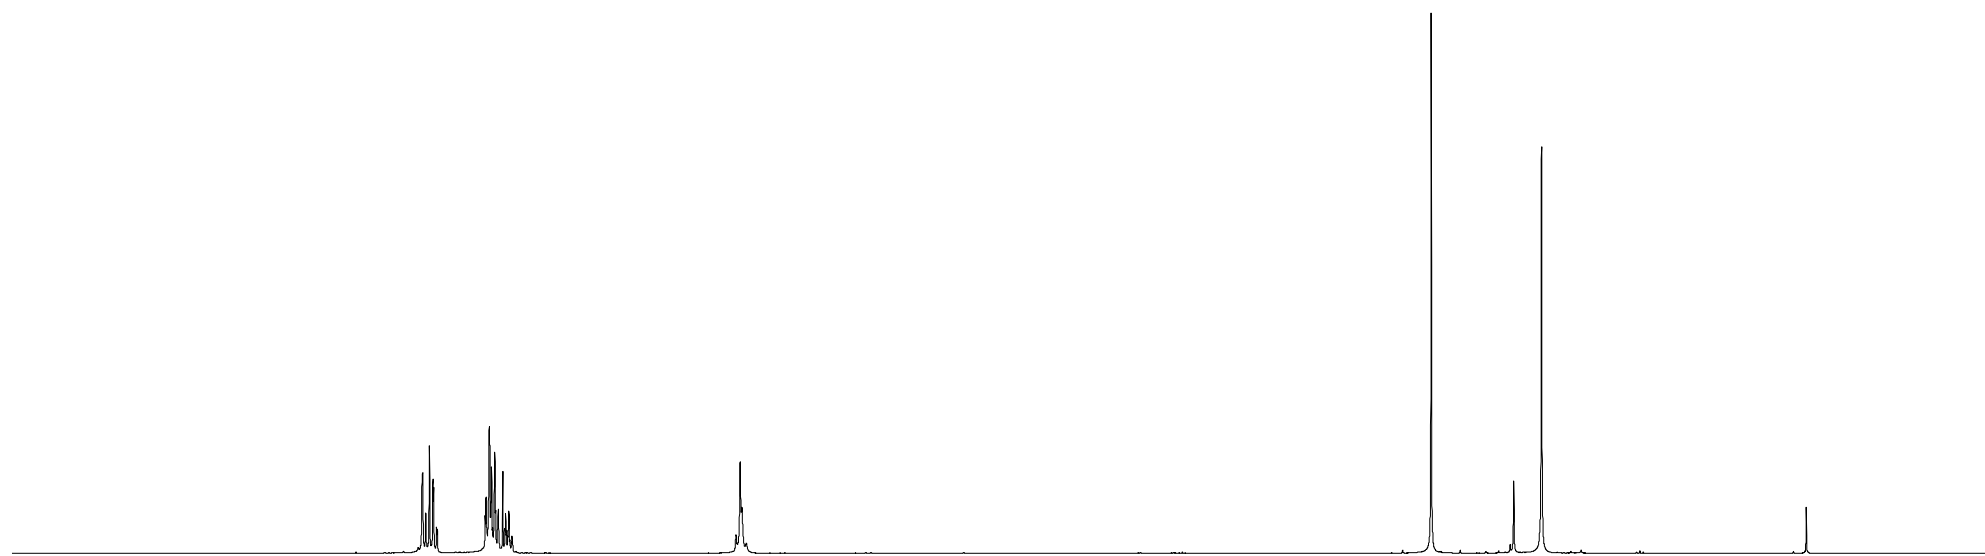

9 8 7 6 5 4 3 2 1 0 ppm

3.00

4.12

0.98

1.98

2.95

3.00

<sup>13</sup>C NMR (150 MHz, CDCl<sub>3</sub>)

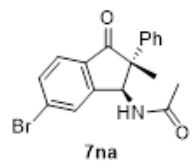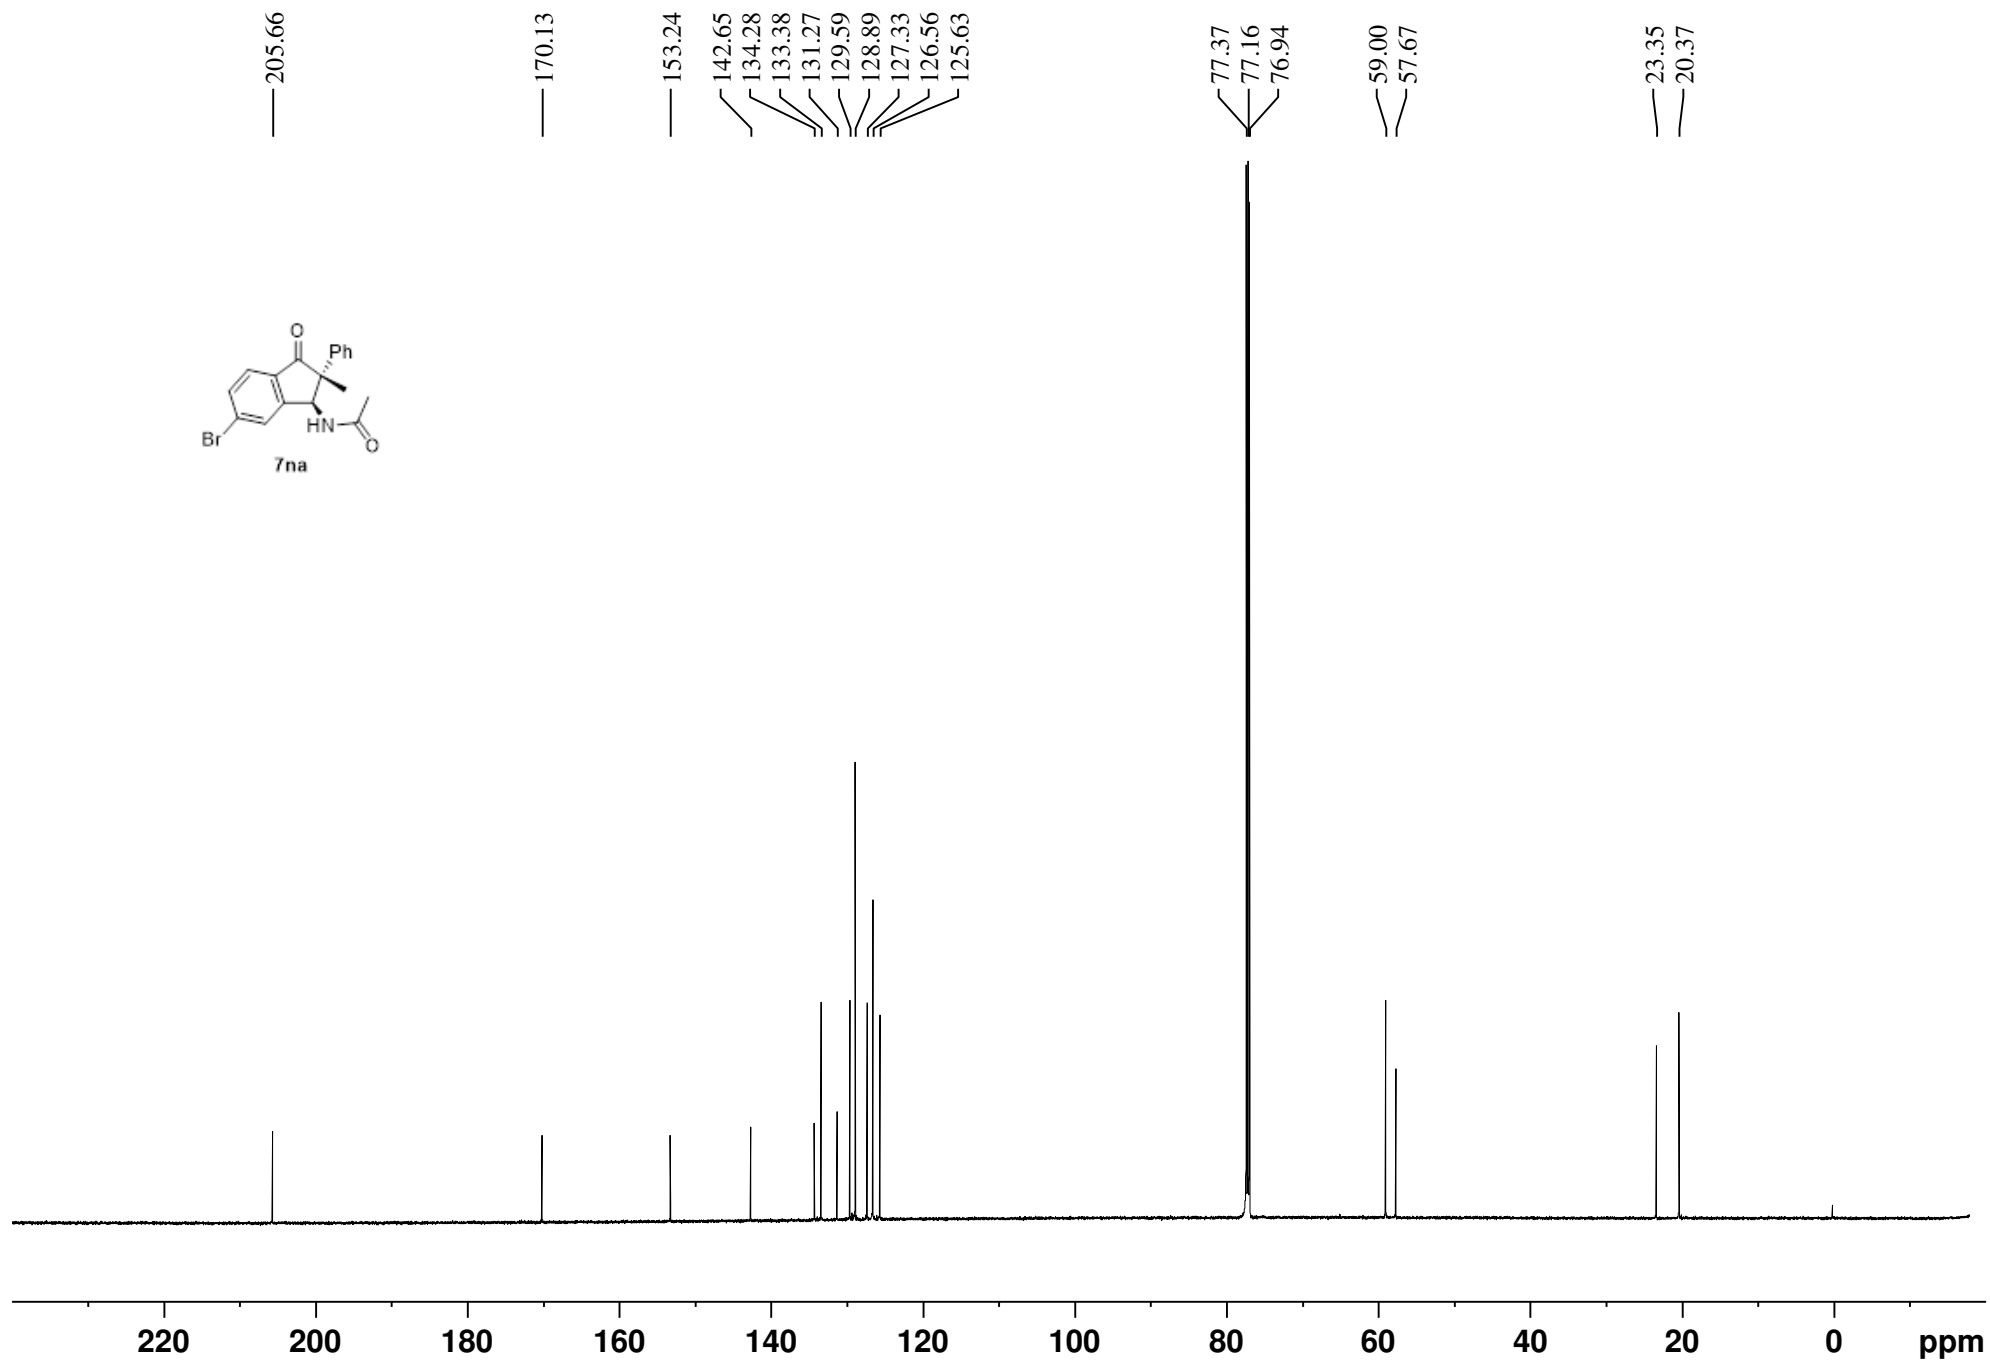

**<sup>1</sup>H NMR (600 MHz, CDCl<sub>3</sub>)**

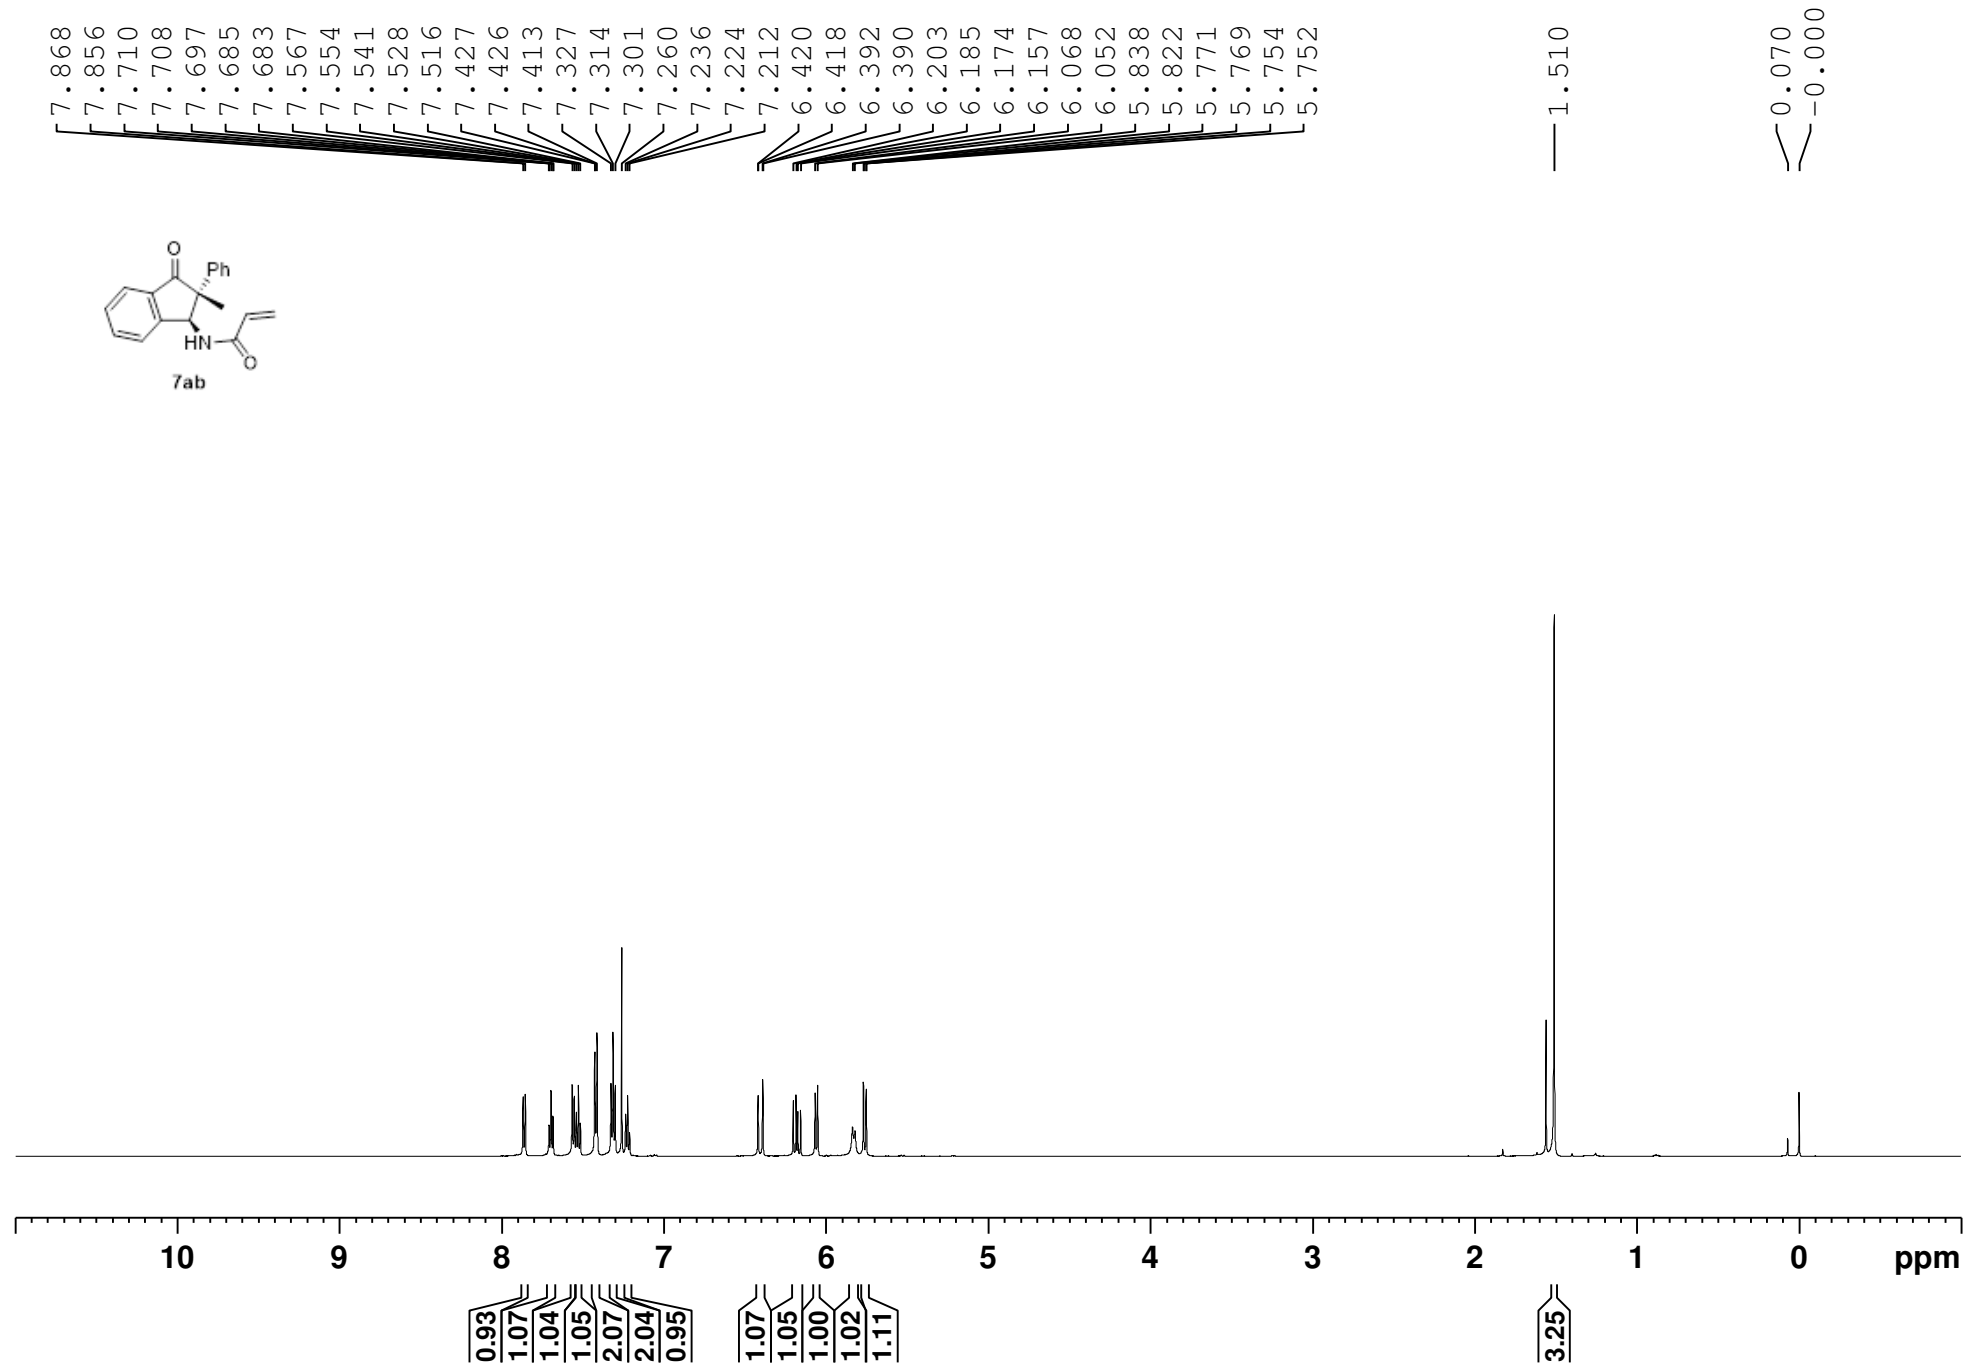

**<sup>13</sup>C NMR (100 MHz, CDCl<sub>3</sub>)**

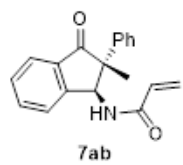

— 207.08

— 165.74

— 151.46

143.19

135.84

135.42

130.13

129.55

128.69

127.61

127.03

126.51

126.28

124.14

77.47

77.16

76.84

59.45

57.61

— 20.22

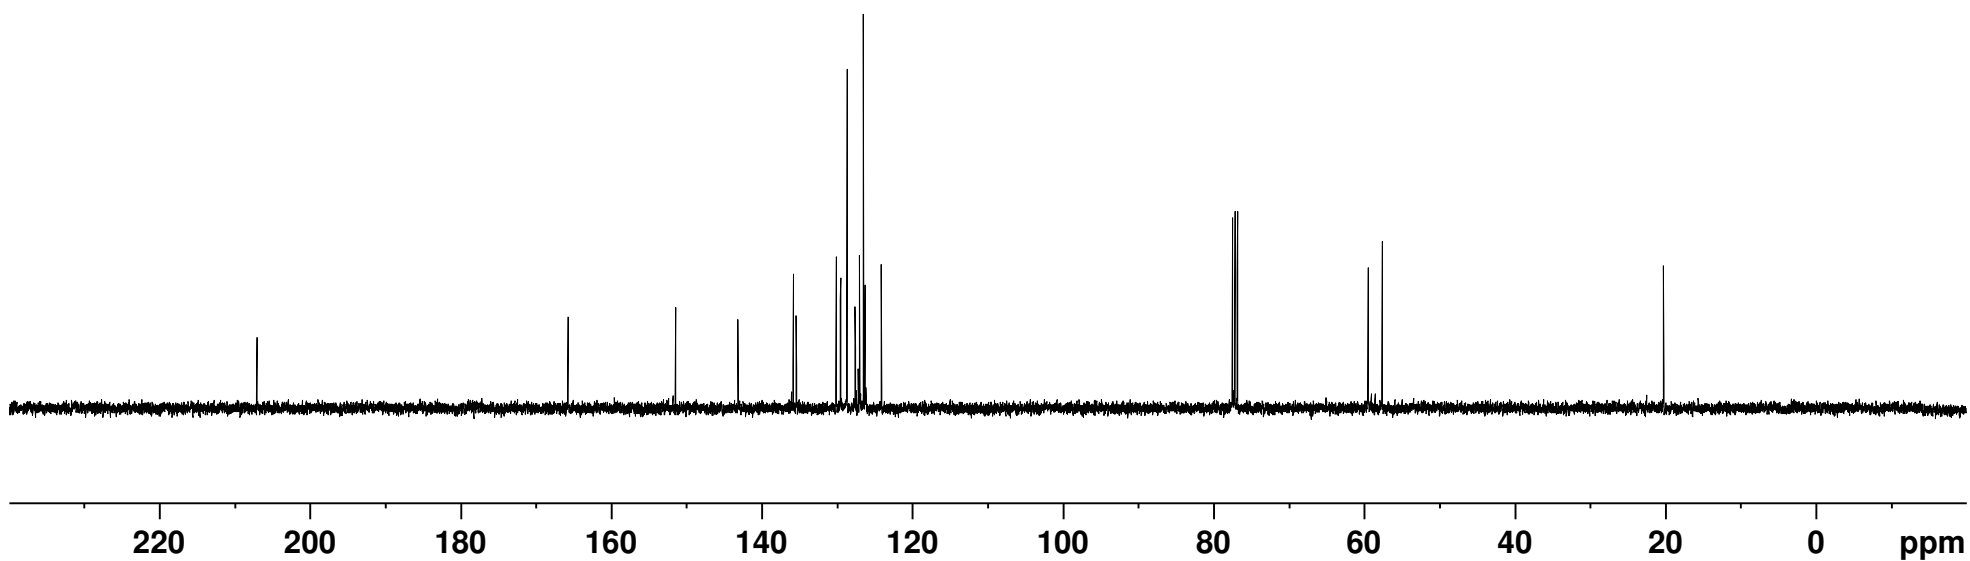

<sup>1</sup>H NMR (600 MHz, CDCl<sub>3</sub>)

7.864  
7.851  
7.817  
7.804  
7.701  
7.688  
7.676  
7.595  
7.582  
7.548  
7.536  
7.523  
7.511  
7.459  
7.447  
7.434  
7.332  
7.319  
7.306  
7.259  
7.243  
7.231  
7.219  
6.526  
6.511  
6.172  
6.156

— 1.567

< 0.075  
< -0.000

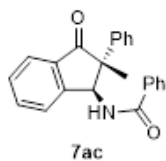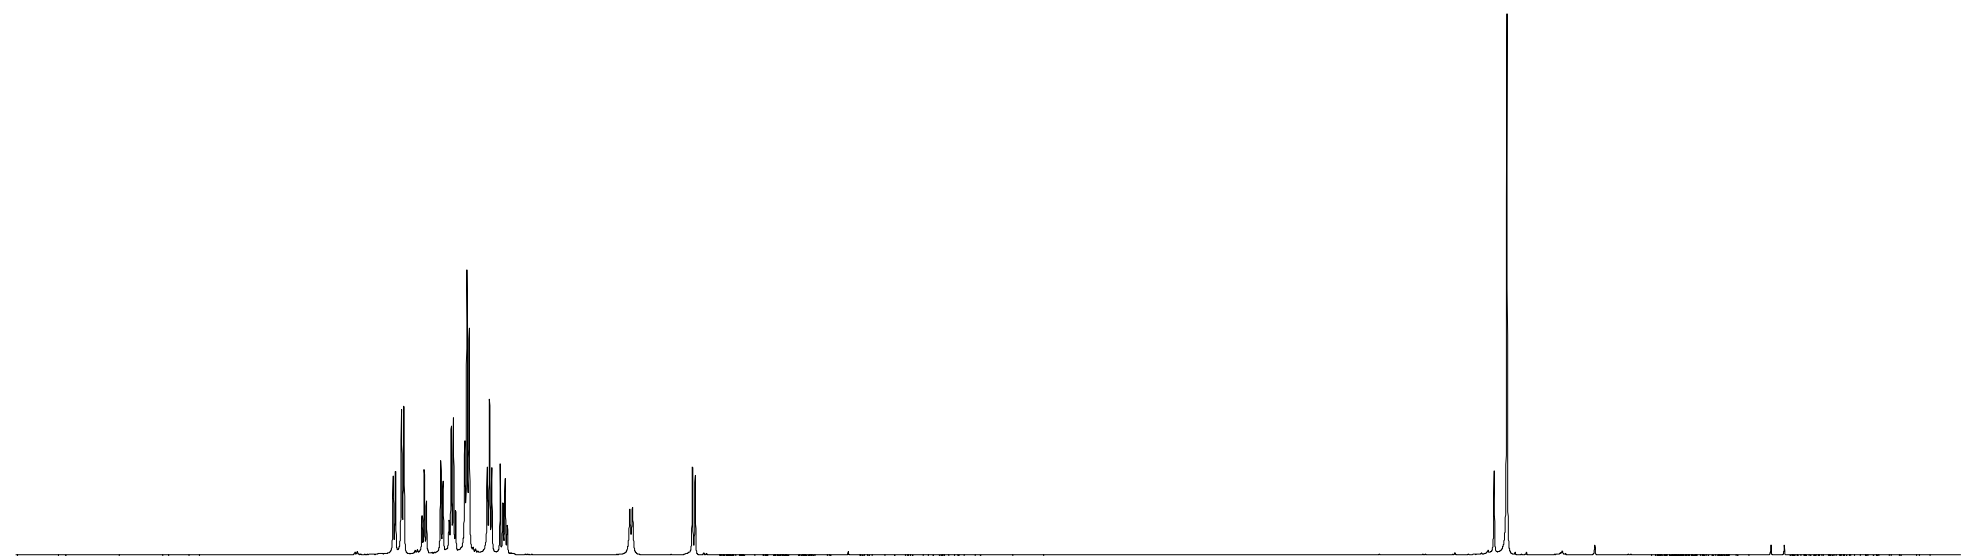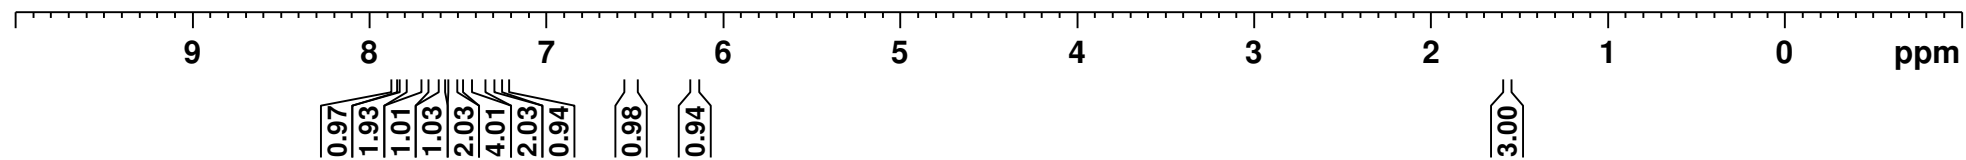



**<sup>13</sup>C NMR (150 MHz, CDCl<sub>3</sub>)**

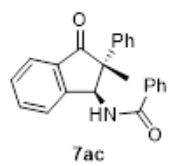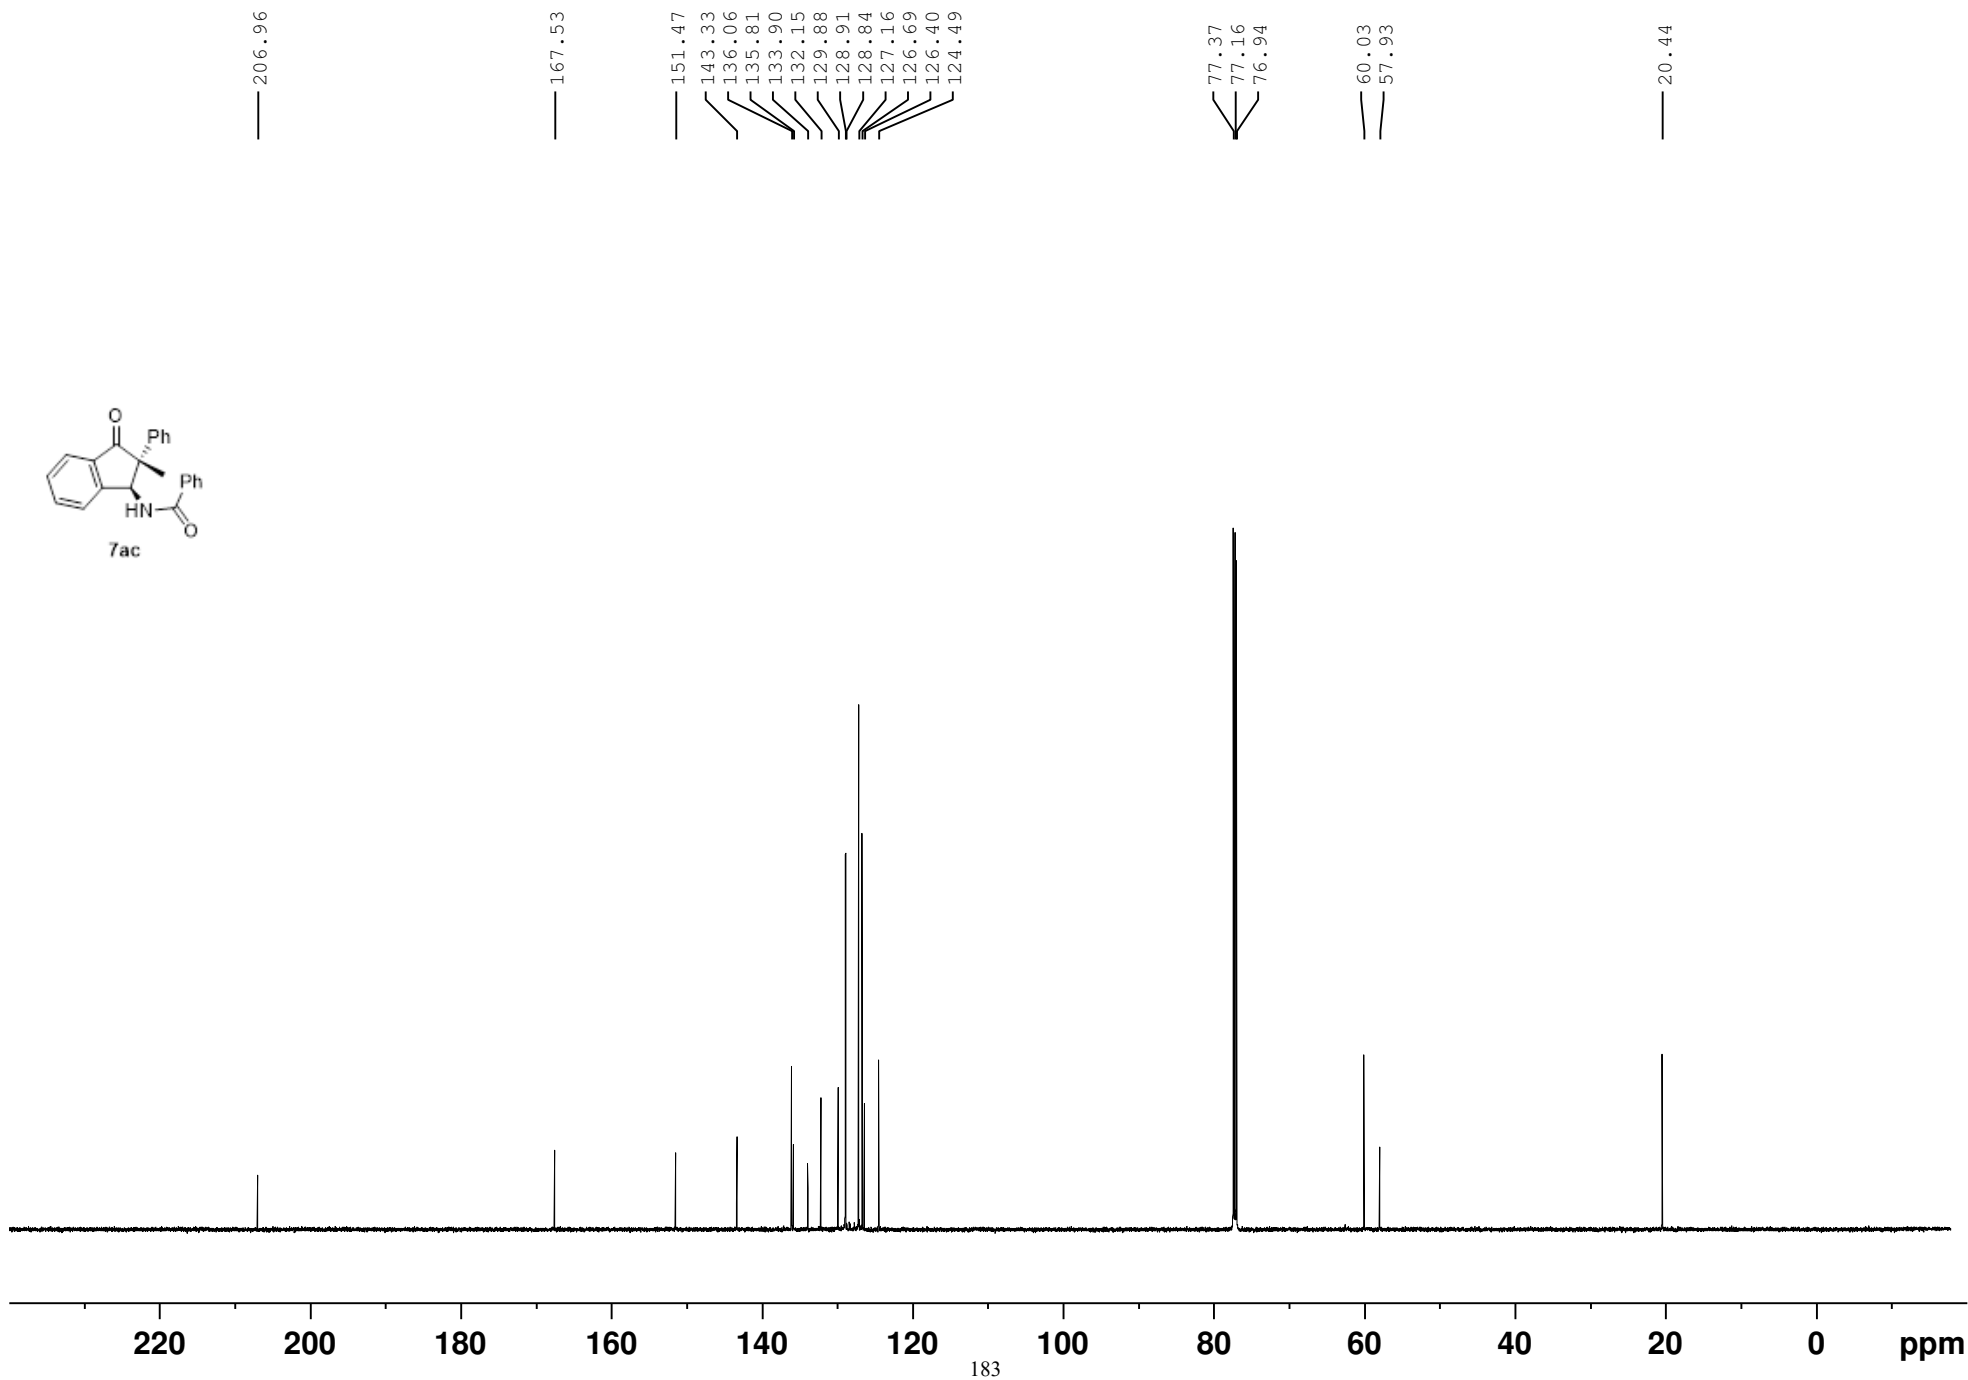

<sup>1</sup>H NMR (600 MHz, CDCl<sub>3</sub>)

7.953  
7.940  
7.735  
7.723  
7.710  
7.637  
7.624  
7.584  
7.572  
7.560  
7.433  
7.421  
7.409  
7.302  
7.294  
7.290  
7.282  
7.277  
7.269  
7.262  
7.215  
7.202  
7.135  
7.123  
5.903  
5.887  
5.792  
5.777

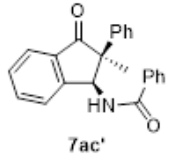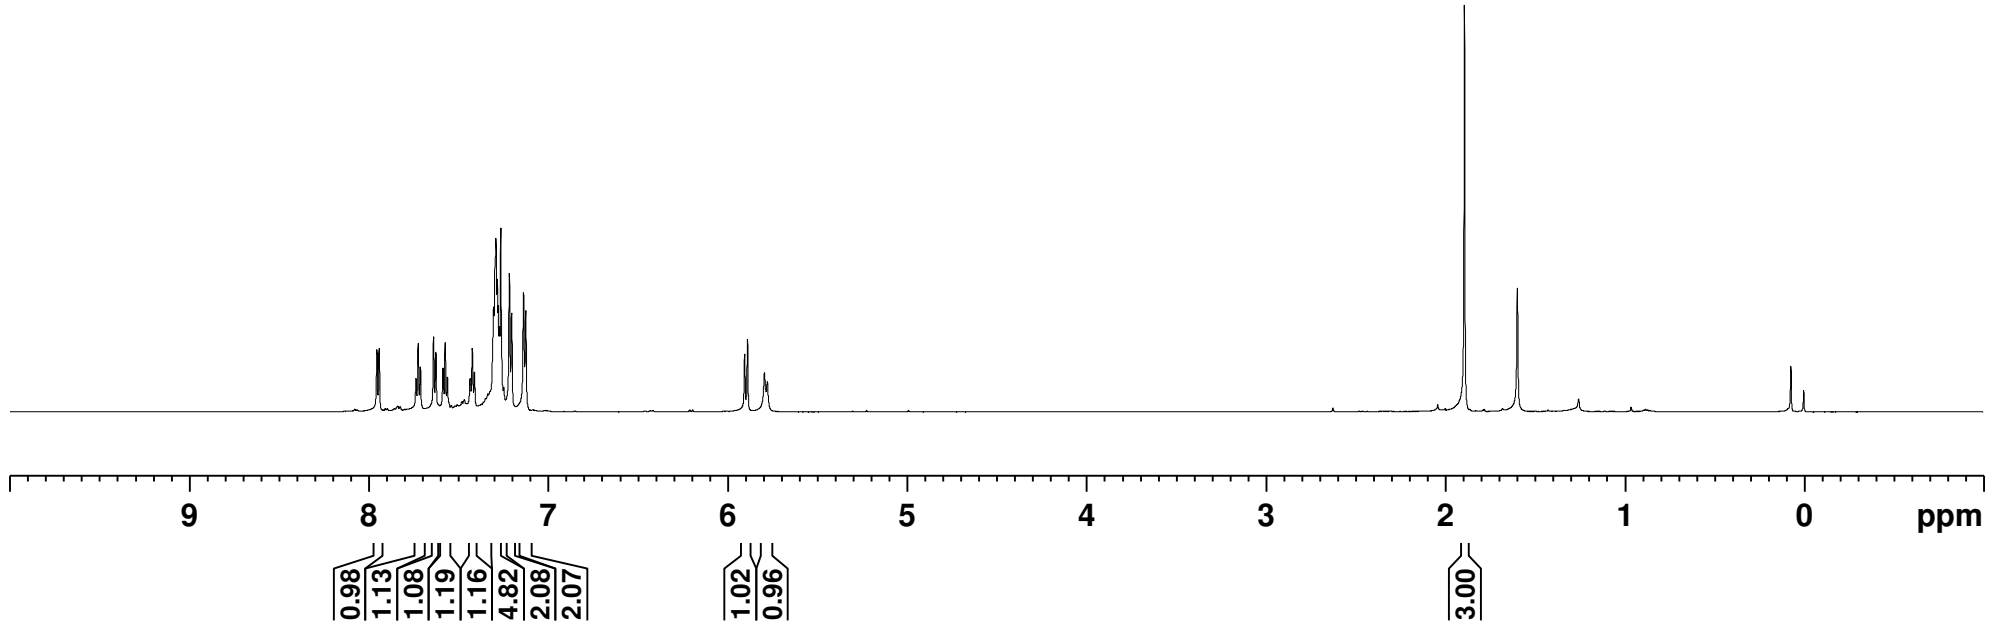

<sup>13</sup>C NMR (150 MHz, CDCl<sub>3</sub>)

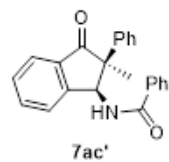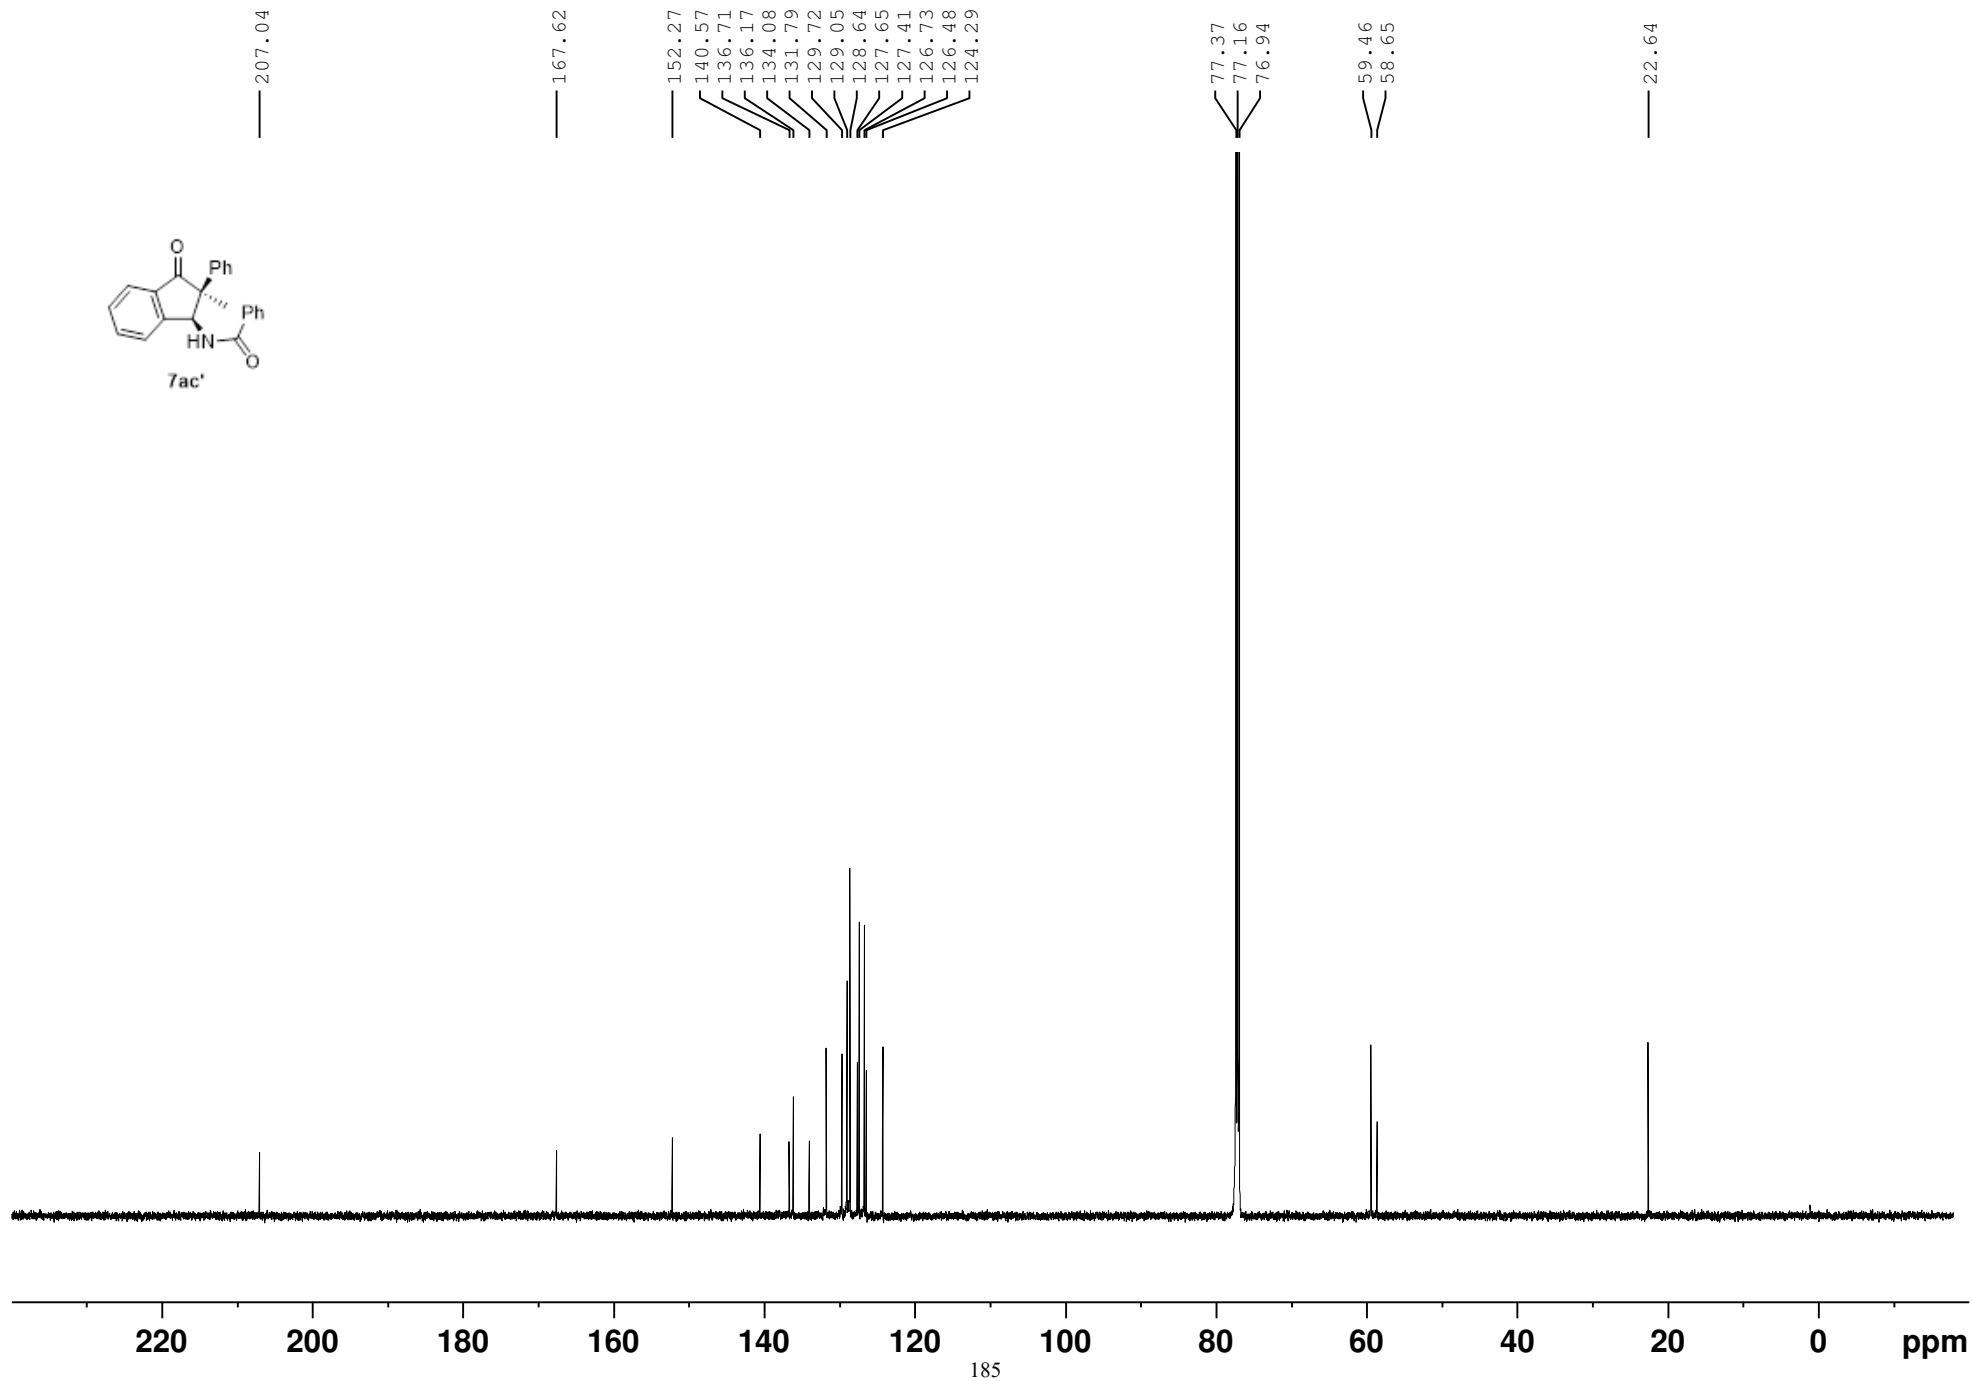

$^1\text{H}$  NMR (600 MHz,  $\text{CDCl}_3$ )

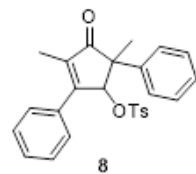

7.370  
7.358  
7.346  
7.334  
7.311  
7.298  
7.286  
7.284  
7.259  
7.244  
7.232  
7.209  
7.196  
7.063  
7.049  
6.076  
6.074

— 2.382  
∨ 1.957  
— 1.955  
— 1.595

∨ 0.070  
∨ -0.000

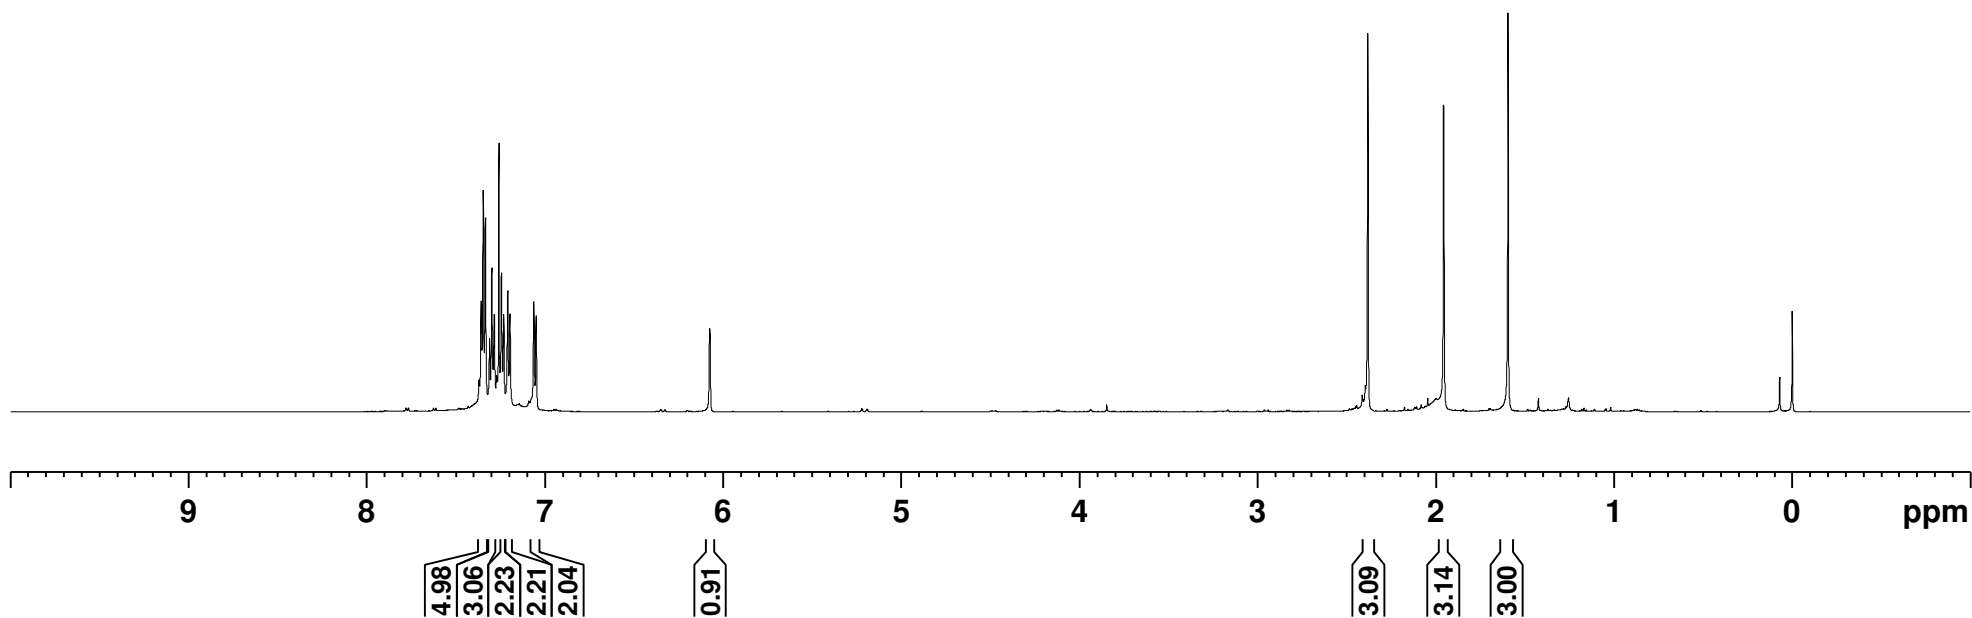

<sup>13</sup>C NMR (150 MHz, CDCl<sub>3</sub>)

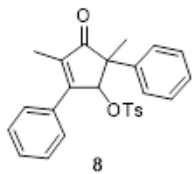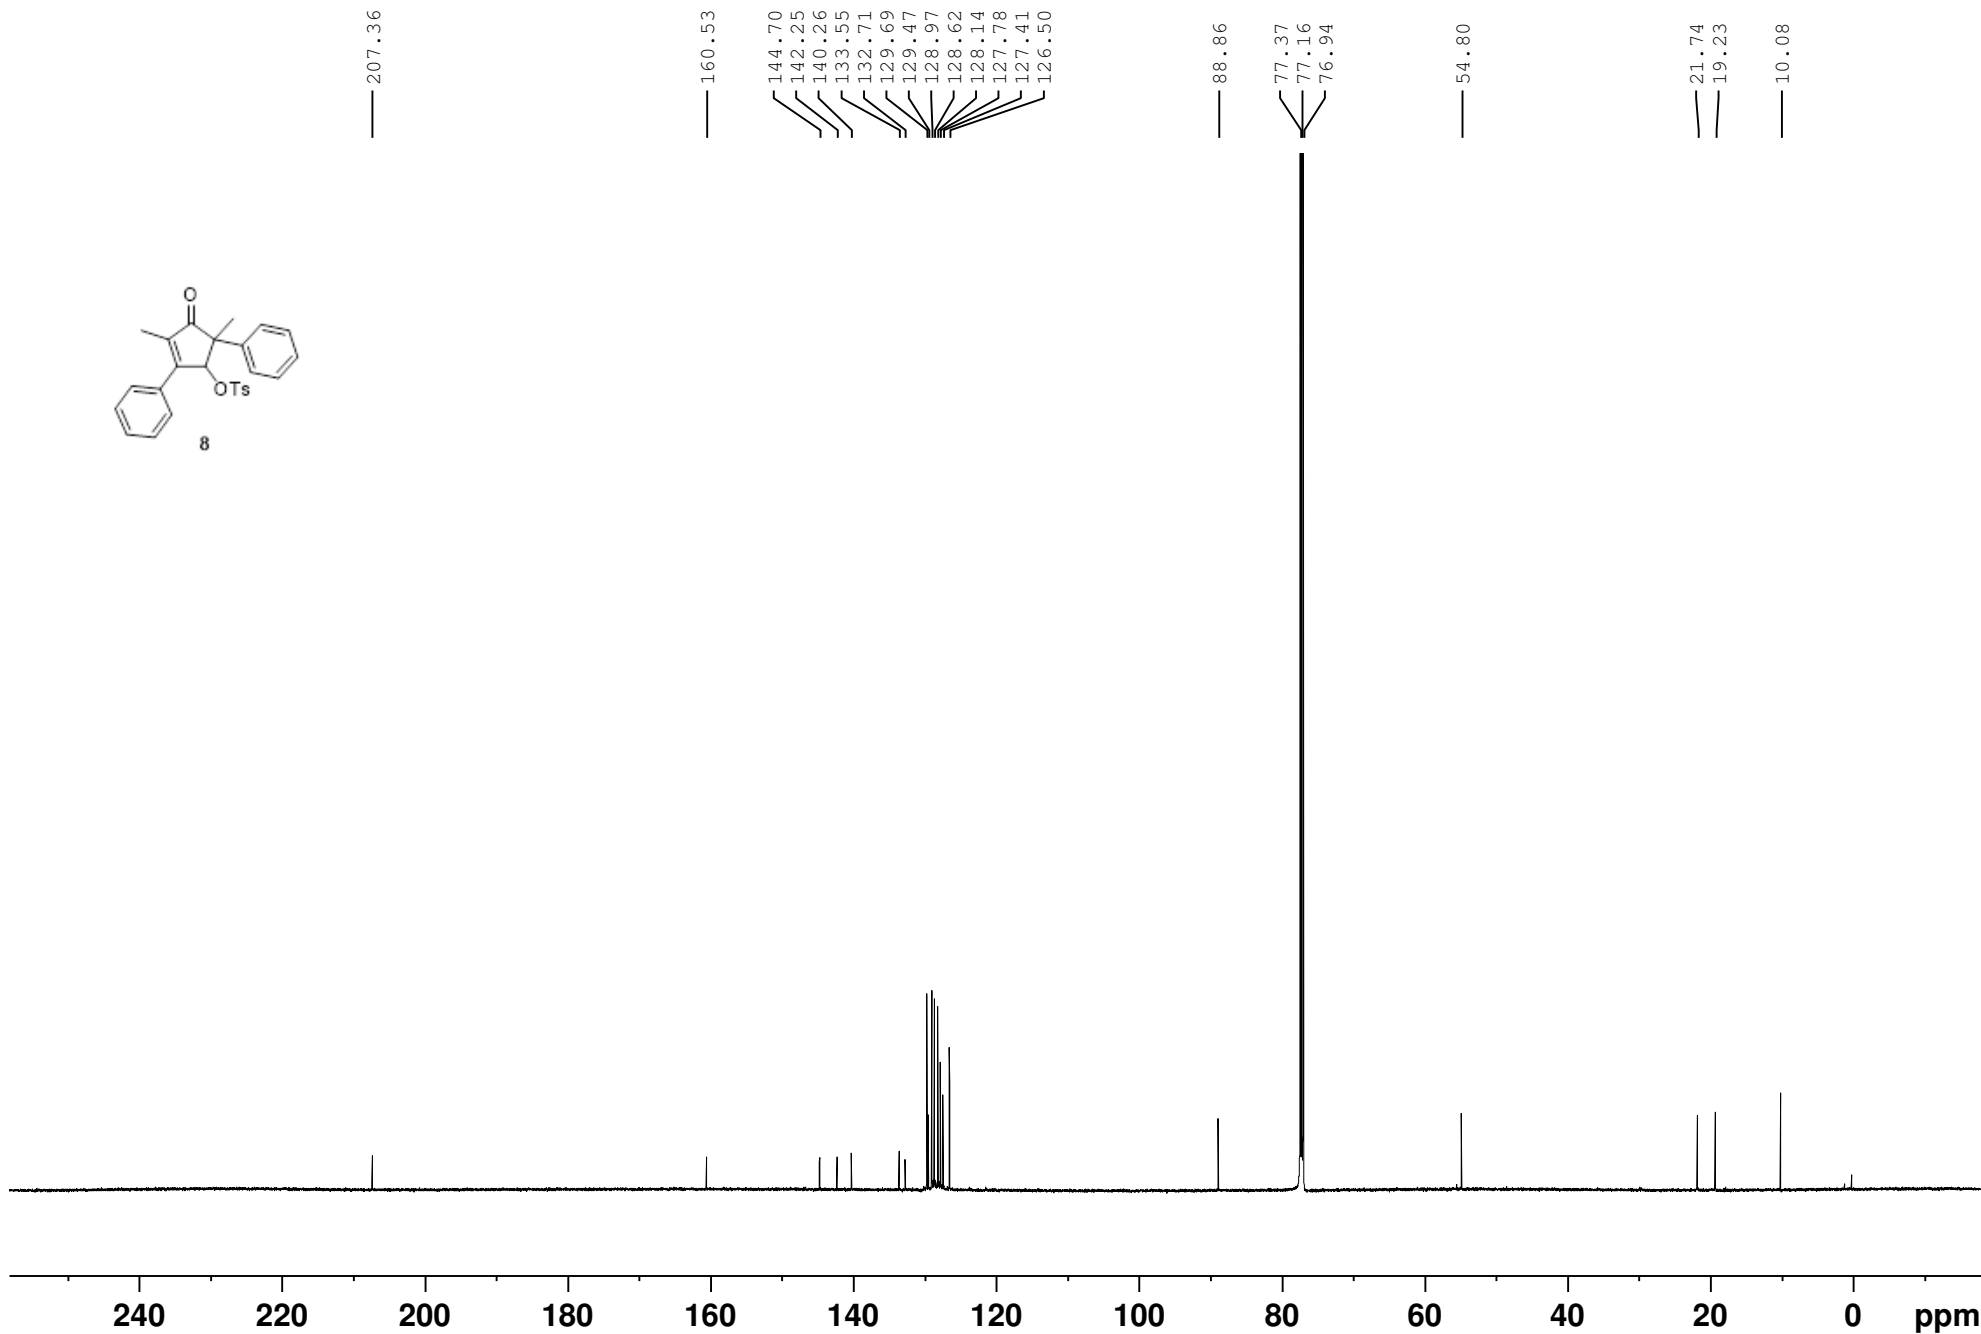

Supplement: d4cc06597b2.pdf [file d4cc06597b2.pdf]
